# Supplementary material for: Synergism of Pro-neurogenic miRNAs&nbsp;Provides a More Effective Strategy to Target Glioma Stem Cells
Source: Research Square preprint supplement (doi:10.21203/rs.3.rs-125940/v1), 2020-12-15
Supplement: Supplementary file 1 [file 1cb7529f2971302e4b8b9d0d.xlsx]

## Sheet: DOWN OVERLAP 3 CELLS
Ensembl ID	Gene Symbol	L2FC_1919	L2FC_3565	L2FC_BE2C	DOWN_1919	DOWN_3565	DOWN_BE2C	Gene Type	miR-124	miR-128	miR-137
ENSG00000003989	SLC7A2	-0.736752	-1.72213	-0.978886	1	1	1	protein_coding	1	0	1
ENSG00000004700	RECQL	-1.00802	-1.23971	-1.35537	1	1	1	protein_coding	0	0	1
ENSG00000004975	DVL2	-0.707898	-0.775529	-0.833091	1	1	1	protein_coding	0	1	1
ENSG00000005022	SLC25A5	-1.19963	-1.79685	-0.939502	1	1	1	protein_coding	0	0	1
ENSG00000006459	KDM7A	-1.41327	-1.55695	-1.18273	1	1	1	protein_coding	0	0	1
ENSG00000011198	ABHD5	-1.22894	-1.34898	-0.878808	1	1	1	protein_coding	1	1	1
ENSG00000014138	POLA2	-0.983637	-1.08442	-0.565662	1	1	1	protein_coding	0	0	0
ENSG00000014164	ZC3H3	-0.524552	-0.597808	-0.518873	1	1	1	protein_coding	0	0	1
ENSG00000034510	TMSB10	-0.699983	-0.908606	-0.645793	1	1	1	protein_coding	0	1	0
ENSG00000035499	DEPDC1B	-0.659128	-0.823672	-0.606799	1	1	1	protein_coding	0	1	0
ENSG00000053254	FOXN3	-1.0512	-1.6968	-0.854532	1	1	1	protein_coding	0	1	1
ENSG00000055070	SZRD1	-1.84481	-2.242	-1.89309	1	1	1	protein_coding	0	1	0
ENSG00000055483	USP36	-0.786534	-0.559616	-0.557906	1	1	1	protein_coding	0	0	1
ENSG00000057757	PITHD1	-0.941279	-1.29222	-0.873309	1	1	1	protein_coding	0	1	0
ENSG00000058262	SEC61A1	-0.853434	-1.4461	-1.44532	1	1	1	protein_coding	0	1	0
ENSG00000060237	WNK1	-0.592458	-0.881664	-0.77935	1	1	1	protein_coding	1	1	0
ENSG00000064393	HIPK2	-1.08786	-1.53603	-0.859114	1	1	1	protein_coding	1	1	0
ENSG00000065615	CYB5R4	-0.784032	-0.542053	-0.72248	1	1	1	protein_coding	0	0	1
ENSG00000065978	YBX1	-0.576818	-0.989405	-0.580336	1	1	1	protein_coding	0	0	1
ENSG00000066322	ELOVL1	-0.900045	-1.05352	-0.913269	1	1	1	protein_coding	0	0	1
ENSG00000070831	CDC42	-1.39314	-1.28969	-0.990413	1	1	1	protein_coding	0	0	1
ENSG00000071794	HLTF	-0.901153	-1.63225	-0.890495	1	1	1	protein_coding	0	0	1
ENSG00000075303	SLC25A40	-0.895641	-0.945766	-0.502964	1	1	1	protein_coding	0	0	0
ENSG00000075539	FRYL	-0.632112	-1.00718	-0.508777	1	1	1	protein_coding	0	1	0
ENSG00000077463	SIRT6	-0.829393	-0.841492	-0.669638	1	1	1	protein_coding	0	0	1
ENSG00000077942	FBLN1	-0.545002	-0.791943	-0.92061	1	1	1	protein_coding	0	0	0
ENSG00000078246	TULP3	-1.58521	-1.39567	-1.54617	1	1	1	protein_coding	0	0	1
ENSG00000085231	AK6	-1.01039	-1.13311	-0.852817	1	1	1	protein_coding	0	0	0
ENSG00000086062	B4GALT1	-1.10432	-1.13346	-1.76646	1	1	1	protein_coding	1	0	0
ENSG00000089195	TRMT6	-0.699407	-0.750017	-0.516918	1	1	1	protein_coding	1	0	1
ENSG00000092036	HAUS4	-0.516673	-0.687798	-0.523659	1	1	1	protein_coding	0	0	0
ENSG00000092094	OSGEP	-0.875002	-0.558034	-0.540493	1	1	1	protein_coding	0	0	1
ENSG00000092621	PHGDH	-1.69255	-2.66256	-2.05201	1	1	1	protein_coding	0	1	1
ENSG00000092758	COL9A3	-1.05791	-1.49826	-1.57863	1	1	1	protein_coding	0	0	0
ENSG00000099284	H2AFY2	-0.928745	-0.900718	-0.507678	1	1	1	protein_coding	0	0	0
ENSG00000099942	CRKL	-0.954329	-1.26238	-0.55539	1	1	1	protein_coding	1	1	1
ENSG00000100422	CERK	-0.705594	-1.31082	-1.33911	1	1	1	protein_coding	0	0	1
ENSG00000100596	SPTLC2	-0.543564	-1.16923	-0.715498	1	1	1	protein_coding	1	1	1
ENSG00000100784	RPS6KA5	-0.963826	-1.58285	-0.649126	1	1	1	protein_coding	0	1	0
ENSG00000100823	APEX1	-0.557968	-0.739278	-0.562187	1	1	1	protein_coding	0	1	0
ENSG00000101189	MRGBP	-1.12062	-0.881904	-0.870637	1	1	1	protein_coding	0	0	0
ENSG00000101224	CDC25B	-0.565654	-0.571072	-0.803065	1	1	1	protein_coding	0	0	0
ENSG00000101544	ADNP2	-0.517803	-0.709787	-0.879259	1	1	1	protein_coding	1	0	0
ENSG00000101888	NXT2	-1.52717	-2.15379	-1.39775	1	1	1	protein_coding	1	1	1
ENSG00000103202	NME4	-0.552988	-1.58501	-0.662236	1	1	1	protein_coding	1	0	0
ENSG00000104081	BMF	-0.751676	-0.970656	-1.12086	1	1	1	protein_coding	1	0	0
ENSG00000104341	LAPTM4B	-1.32625	-1.69007	-2.23699	1	1	1	protein_coding	0	1	1
ENSG00000104375	STK3	-1.53846	-1.80617	-1.13538	1	1	1	protein_coding	0	0	1
ENSG00000105221	AKT2	-1.18337	-1.08324	-1.05799	1	1	1	protein_coding	1	0	1
ENSG00000105281	SLC1A5	-1.09589	-1.4555	-0.959697	1	1	1	protein_coding	0	0	1
ENSG00000105894	PTN	-0.921139	-2.22548	-1.1496	1	1	1	protein_coding	0	0	1
ENSG00000105948	TTC26	-0.769714	-1.07729	-0.588154	1	1	1	protein_coding	1	0	1
ENSG00000106003	LFNG	-0.888037	-1.11712	-1.50859	1	1	1	protein_coding	0	0	0
ENSG00000106780	MEGF9	-0.770231	-1.6392	-0.653191	1	1	1	protein_coding	0	0	1
ENSG00000108179	PPIF	-0.678154	-0.851772	-0.7483	1	1	1	protein_coding	1	1	0
ENSG00000108406	DHX40	-0.63562	-1.00836	-0.800544	1	1	1	protein_coding	0	0	1
ENSG00000109458	GAB1	-1.02105	-0.728896	-1.42948	1	1	1	protein_coding	0	1	0
ENSG00000109861	CTSC	-1.2028	-1.28613	-0.796895	1	1	1	protein_coding	0	0	0
ENSG00000110057	UNC93B1	-0.592453	-1.22568	-0.98947	1	1	1	protein_coding	0	0	1
ENSG00000110492	MDK	-0.864547	-1.05971	-0.717638	1	1	1	protein_coding	0	0	0
ENSG00000110700	RPS13	-1.11795	-1.51771	-0.614727	1	1	1	protein_coding	0	0	1
ENSG00000110900	TSPAN11	-0.833812	-1.2507	-1.96627	1	1	1	protein_coding	0	0	0
ENSG00000112062	MAPK14	-0.642409	-0.850848	-0.897205	1	1	1	protein_coding	1	1	0
ENSG00000112110	MRPL18	-0.664943	-1.29495	-0.732164	1	1	1	protein_coding	0	0	1
ENSG00000112149	CD83	-2.09131	-2.20957	-2.55895	1	1	1	protein_coding	0	0	1
ENSG00000112531	QKI	-1.1776	-2.23172	-1.16295	1	1	1	protein_coding	1	1	1
ENSG00000112851	ERBIN	-0.777395	-1.03248	-0.98631	1	1	1	protein_coding	0	0	0
ENSG00000113300	CNOT6	-0.889612	-1.09683	-0.926279	1	1	1	protein_coding	0	1	0
ENSG00000113368	LMNB1	-1.9868	-1.89373	-1.63555	1	1	1	protein_coding	0	1	1
ENSG00000113595	TRIM23	-0.723598	-1.14198	-0.699145	1	1	1	protein_coding	0	1	1
ENSG00000114786	ABHD14A-ACY1	-0.891297	-0.559907	-1.38807	1	1	1	protein_coding	0	0	0
ENSG00000114999	TTL	-1.02018	-0.934442	-0.552162	1	1	1	protein_coding	1	0	1
ENSG00000115159	GPD2	-1.64245	-1.48105	-1.30545	1	1	1	protein_coding	1	1	1
ENSG00000115641	FHL2	-1.03164	-0.520726	-0.712859	1	1	1	protein_coding	0	0	0
ENSG00000116157	GPX7	-1.86824	-2.12623	-1.66898	1	1	1	protein_coding	0	0	1
ENSG00000116670	MAD2L2	-1.2266	-1.88856	-1.28663	1	1	1	protein_coding	0	0	0
ENSG00000116747	TROVE2	-0.847069	-1.32079	-1.2897	1	1	1	protein_coding	0	0	0
ENSG00000117174	ZNHIT6	-1.35775	-1.36385	-1.17465	1	1	1	protein_coding	1	0	1
ENSG00000117298	ECE1	-1.23457	-0.934739	-1.13143	1	1	1	protein_coding	1	1	0
ENSG00000117500	TMED5	-1.02977	-1.44332	-0.680199	1	1	1	protein_coding	0	1	1
ENSG00000117650	NEK2	-1.1448	-1.15863	-0.871126	1	1	1	protein_coding	0	1	1
ENSG00000118242	MREG	-0.504449	-1.04125	-0.616463	1	1	1	protein_coding	0	0	0
ENSG00000118418	HMGN3	-0.67829	-1.10259	-1.0594	1	1	1	protein_coding	0	0	0
ENSG00000119139	TJP2	-0.970248	-0.706051	-1.23726	1	1	1	protein_coding	1	0	1
ENSG00000119328	FAM206A	-0.820439	-1.24363	-0.987114	1	1	1	protein_coding	0	0	0
ENSG00000119541	VPS4B	-0.847609	-0.64741	-0.959268	1	1	1	protein_coding	1	1	0
ENSG00000119711	ALDH6A1	-0.565029	-0.532107	-0.7262	1	1	1	protein_coding	1	0	0
ENSG00000119812	FAM98A	-0.580615	-0.834908	-0.912436	1	1	1	protein_coding	0	0	1
ENSG00000119977	TCTN3	-0.563364	-0.878061	-0.785493	1	1	1	protein_coding	0	0	1
ENSG00000120162	MOB3B	-1.34516	-1.25384	-1.1584	1	1	1	protein_coding	0	0	0
ENSG00000120253	NUP43	-0.52949	-0.691187	-0.619554	1	1	1	protein_coding	0	0	1
ENSG00000120727	PAIP2	-1.63881	-1.99253	-1.39136	1	1	1	protein_coding	0	1	0
ENSG00000120742	SERP1	-0.584388	-0.902436	-0.600737	1	1	1	protein_coding	1	0	1
ENSG00000120875	DUSP4	-1.25996	-0.687214	-0.832547	1	1	1	protein_coding	0	0	1
ENSG00000123159	GIPC1	-0.989421	-1.50817	-0.71002	1	1	1	protein_coding	0	0	1
ENSG00000124098	FAM210B	-0.813334	-1.12291	-0.701101	1	1	1	protein_coding	0	0	0
ENSG00000124767	GLO1	-0.64791	-1.13048	-0.709441	1	1	1	protein_coding	0	0	1
ENSG00000124920	MYRF	-0.966214	-0.554194	-0.971851	1	1	1	protein_coding	1	0	0
ENSG00000125656	CLPP	-0.946265	-1.89461	-1.11802	1	1	1	protein_coding	0	1	0
ENSG00000126603	GLIS2	-1.80249	-1.91281	-0.770616	1	1	1	protein_coding	1	0	1
ENSG00000128408	RIBC2	-1.08681	-0.700478	-1.09692	1	1	1	protein_coding	0	0	0
ENSG00000128791	TWSG1	-0.881155	-1.12131	-1.09783	1	1	1	protein_coding	1	0	1
ENSG00000129235	TXNDC17	-0.627598	-1.26494	-0.927296	1	1	1	protein_coding	0	0	1
ENSG00000130707	ASS1	-1.26328	-0.545412	-0.558889	1	1	1	protein_coding	0	0	0
ENSG00000131174	COX7B	-0.520154	-1.41963	-0.665725	1	1	1	protein_coding	0	1	1
ENSG00000131844	MCCC2	-0.649144	-0.681218	-0.862494	1	1	1	protein_coding	0	0	0
ENSG00000132294	EFR3A	-0.871261	-0.922104	-0.992168	1	1	1	protein_coding	0	1	1
ENSG00000132475	H3F3B	-0.885352	-1.03743	-0.708855	1	1	1	protein_coding	0	1	1
ENSG00000133103	COG6	-0.788192	-1.06756	-0.939104	1	1	1	protein_coding	0	0	0
ENSG00000134247	PTGFRN	-1.00486	-1.61624	-1.10787	1	1	1	protein_coding	0	1	1
ENSG00000134291	TMEM106C	-0.752951	-0.61532	-0.567852	1	1	1	protein_coding	0	0	0
ENSG00000134317	GRHL1	-0.865323	-0.842252	-0.794635	1	1	1	protein_coding	0	0	0
ENSG00000134698	AGO4	-1.11767	-0.904494	-0.646854	1	1	1	protein_coding	0	0	0
ENSG00000135093	USP30	-0.735638	-0.504687	-0.763307	1	1	1	protein_coding	1	0	1
ENSG00000135097	MSI1	-1.06652	-1.68727	-1.33992	1	1	1	protein_coding	0	1	1
ENSG00000135108	FBXO21	-0.679631	-0.604744	-1.018	1	1	1	protein_coding	0	1	0
ENSG00000135250	SRPK2	-0.595571	-0.86229	-0.530349	1	1	1	protein_coding	0	1	0
ENSG00000135617	PRADC1	-1.30543	-1.38193	-1.17238	1	1	1	protein_coding	0	0	0
ENSG00000135776	ABCB10	-0.629269	-2.03115	-1.53184	1	1	1	protein_coding	0	0	0
ENSG00000136044	APPL2	-1.86017	-1.40327	-1.65026	1	1	1	protein_coding	0	0	1
ENSG00000138386	NAB1	-1.07771	-1.01707	-1.21366	1	1	1	protein_coding	0	0	1
ENSG00000138434	ITPRID2	-0.593994	-0.523434	-0.945532	1	1	1	protein_coding	0	0	0
ENSG00000138439	FAM117B	-1.00753	-1.24836	-0.698864	1	1	1	protein_coding	0	0	1
ENSG00000139218	SCAF11	-0.63553	-0.658358	-0.572502	1	1	1	protein_coding	0	0	0
ENSG00000139433	GLTP	-0.653827	-0.62187	-0.935237	1	1	1	protein_coding	1	1	0
ENSG00000139880	CDH24	-0.962434	-0.723953	-0.929218	1	1	1	protein_coding	0	1	0
ENSG00000139921	TMX1	-1.20627	-1.20813	-1.29661	1	1	1	protein_coding	0	1	1
ENSG00000140262	TCF12	-0.588445	-1.17683	-0.545334	1	1	1	protein_coding	0	0	1
ENSG00000140564	FURIN	-1.12933	-0.853622	-0.636899	1	1	1	protein_coding	1	1	1
ENSG00000141179	PCTP	-1.24604	-0.97939	-1.29949	1	1	1	protein_coding	0	0	1
ENSG00000141349	G6PC3	-0.804231	-1.33251	-1.40783	1	1	1	protein_coding	0	1	0
ENSG00000141380	SS18	-1.92396	-1.73545	-1.60338	1	1	1	protein_coding	0	1	1
ENSG00000142327	RNPEPL1	-0.80779	-1.28694	-0.548584	1	1	1	protein_coding	1	1	0
ENSG00000142676	RPL11	-1.15726	-1.53639	-0.745368	1	1	1	protein_coding	0	0	1
ENSG00000143416	SELENBP1	-0.516752	-0.605099	-0.801879	1	1	1	protein_coding	0	0	0
ENSG00000143476	DTL	-1.09039	-1.18376	-0.660753	1	1	1	protein_coding	0	0	1
ENSG00000144455	SUMF1	-0.652376	-0.517512	-1.37754	1	1	1	protein_coding	1	0	0
ENSG00000146556	WASH2P	-0.668568	-0.624029	-0.591012	1	1	1	transcribed_unprocessed_pseudogene	0	0	0
ENSG00000146648	EGFR	-1.3754	-1.83236	-1.45109	1	1	1	protein_coding	0	1	1
ENSG00000147536	GINS4	-0.641617	-0.640805	-0.552715	1	1	1	protein_coding	0	0	0
ENSG00000147862	NFIB	-0.748522	-0.918442	-0.840744	1	1	1	protein_coding	1	1	1
ENSG00000148153	INIP	-0.727698	-0.76126	-0.518547	1	1	1	protein_coding	0	0	0
ENSG00000148411	NACC2	-1.22153	-0.938275	-0.566307	1	1	1	protein_coding	1	1	1
ENSG00000149679	CABLES2	-1.6682	-0.882452	-1.25153	1	1	1	protein_coding	0	1	1
ENSG00000149923	PPP4C	-0.559587	-0.807776	-0.721502	1	1	1	protein_coding	0	1	0
ENSG00000150433	TMEM218	-0.922029	-1.02926	-0.894535	1	1	1	protein_coding	0	0	1
ENSG00000151576	QTRT2	-0.577031	-0.853237	-0.512067	1	1	1	protein_coding	0	0	0
ENSG00000153006	SREK1IP1	-0.772528	-1.14072	-0.881825	1	1	1	protein_coding	1	0	0
ENSG00000153944	MSI2	-0.944338	-1.30284	-1.23712	1	1	1	protein_coding	0	1	1
ENSG00000154059	IMPACT	-0.57508	-1.01122	-0.851211	1	1	1	protein_coding	1	0	1
ENSG00000154153	RETREG1	-0.61379	-0.930692	-1.18045	1	1	1	protein_coding	0	0	0
ENSG00000154511	FAM69A	-0.687813	-0.915535	-0.602515	1	1	1	protein_coding	0	0	0
ENSG00000154920	EME1	-0.695633	-0.930359	-0.598831	1	1	1	protein_coding	0	0	0
ENSG00000156162	DPY19L4	-0.961413	-0.806721	-0.801429	1	1	1	protein_coding	1	0	0
ENSG00000156374	PCGF6	-0.626336	-1.11448	-0.599816	1	1	1	protein_coding	0	0	1
ENSG00000156398	SFXN2	-1.24948	-0.699826	-0.772323	1	1	1	protein_coding	0	1	0
ENSG00000156531	PHF6	-1.27525	-1.63102	-1.3647	1	1	1	protein_coding	1	1	0
ENSG00000157191	NECAP2	-0.548804	-0.857551	-0.554069	1	1	1	protein_coding	1	0	0
ENSG00000158402	CDC25C	-0.554518	-0.742523	-0.812673	1	1	1	protein_coding	0	0	0
ENSG00000159423	ALDH4A1	-1.26501	-1.16819	-1.1977	1	1	1	protein_coding	0	1	0
ENSG00000160014	CALM3	-0.970541	-0.965104	-0.901606	1	1	1	protein_coding	0	0	1
ENSG00000160216	AGPAT3	-0.875011	-0.911877	-0.640642	1	1	1	protein_coding	0	1	1
ENSG00000160563	MED27	-0.86257	-1.34952	-0.890445	1	1	1	protein_coding	0	0	1
ENSG00000161642	ZNF385A	-2.86959	-2.91739	-2.62028	1	1	1	protein_coding	0	1	1
ENSG00000161920	MED11	-1.82221	-2.55241	-1.1588	1	1	1	protein_coding	0	0	1
ENSG00000162437	RAVER2	-0.980371	-0.7201	-0.662224	1	1	1	protein_coding	1	0	1
ENSG00000162734	PEA15	-1.2358	-1.57032	-0.881371	1	1	1	protein_coding	0	0	0
ENSG00000162738	VANGL2	-0.966735	-1.32146	-1.12262	1	1	1	protein_coding	1	1	0
ENSG00000162878	PKDCC	-0.710491	-0.612484	-0.746121	1	1	1	protein_coding	0	0	1
ENSG00000163389	POGLUT1	-0.629842	-0.574901	-0.938468	1	1	1	protein_coding	1	1	0
ENSG00000163605	PPP4R2	-0.55369	-0.900022	-0.68263	1	1	1	protein_coding	0	1	1
ENSG00000163682	RPL9	-0.898597	-1.24827	-0.583954	1	1	1	protein_coding	0	0	1
ENSG00000163785	RYK	-1.49	-1.15738	-1.01402	1	1	1	protein_coding	1	0	1
ENSG00000163788	SNRK	-0.738152	-0.729951	-0.773716	1	1	1	protein_coding	0	0	0
ENSG00000163807	KIAA1143	-1.26166	-1.56832	-0.658991	1	1	1	protein_coding	0	0	0
ENSG00000163832	ELP6	-0.811377	-1.49718	-1.10467	1	1	1	protein_coding	0	0	0
ENSG00000163884	KLF15	-1.26632	-1.31383	-1.01782	1	1	1	protein_coding	1	0	1
ENSG00000164300	SERINC5	-0.576349	-0.639676	-0.555769	1	1	1	protein_coding	0	0	0
ENSG00000164332	UBLCP1	-0.602331	-0.62117	-0.659354	1	1	1	protein_coding	0	0	1
ENSG00000164649	CDCA7L	-0.620174	-1.22348	-0.671925	1	1	1	protein_coding	0	0	1
ENSG00000165355	FBXO33	-1.04776	-1.18847	-1.06907	1	1	1	protein_coding	0	1	1
ENSG00000165795	NDRG2	-1.02324	-0.768773	-1.23342	1	1	1	protein_coding	0	0	0
ENSG00000165895	ARHGAP42	-0.893624	-1.98766	-1.39956	1	1	1	protein_coding	0	0	1
ENSG00000166224	SGPL1	-1.27437	-1.47257	-1.51109	1	1	1	protein_coding	1	0	1
ENSG00000166272	WBP1L	-1.40095	-1.12863	-1.21255	1	1	1	protein_coding	0	1	0
ENSG00000166402	TUB	-0.856844	-1.28686	-0.859427	1	1	1	protein_coding	1	1	0
ENSG00000166483	WEE1	-0.775638	-0.514221	-1.01641	1	1	1	protein_coding	0	1	0
ENSG00000166681	BEX3	-0.657042	-1.365	-1.32025	1	1	1	protein_coding	0	0	0
ENSG00000166831	RBPMS2	-1.53479	-2.29453	-2.50671	1	1	1	protein_coding	0	1	0
ENSG00000166913	YWHAB	-0.635894	-0.708524	-0.778932	1	1	1	protein_coding	0	1	0
ENSG00000167085	PHB	-0.607788	-1.31413	-0.88122	1	1	1	protein_coding	0	1	0
ENSG00000167220	HDHD2	-0.633466	-1.41146	-0.762364	1	1	1	protein_coding	0	0	0
ENSG00000167397	VKORC1	-0.788218	-1.14332	-0.810177	1	1	1	protein_coding	0	0	1
ENSG00000167771	RCOR2	-0.991708	-1.27889	-0.87085	1	1	1	protein_coding	0	0	1
ENSG00000168214	RBPJ	-1.36708	-1.32191	-1.135	1	1	1	protein_coding	0	0	1
ENSG00000168283	BMI1	-1.07381	-0.750491	-0.798292	1	1	1	protein_coding	0	1	0
ENSG00000168710	AHCYL1	-1.02098	-1.67121	-0.911555	1	1	1	protein_coding	0	0	1
ENSG00000169299	PGM2	-0.710281	-1.19103	-0.763207	1	1	1	protein_coding	0	0	0
ENSG00000169764	UGP2	-0.890058	-0.677941	-0.756955	1	1	1	protein_coding	0	0	1
ENSG00000170185	USP38	-0.680118	-0.70061	-0.536566	1	1	1	protein_coding	1	0	1
ENSG00000171016	PYGO1	-1.05946	-0.711593	-0.647511	1	1	1	protein_coding	0	0	1
ENSG00000171320	ESCO2	-1.60385	-1.83274	-1.59022	1	1	1	protein_coding	0	0	1
ENSG00000171604	CXXC5	-1.0152	-0.569462	-0.503082	1	1	1	protein_coding	0	0	0
ENSG00000171792	RHNO1	-1.14259	-0.958687	-0.728745	1	1	1	protein_coding	0	0	0
ENSG00000172057	ORMDL3	-1.07546	-0.837259	-0.772474	1	1	1	protein_coding	0	0	0
ENSG00000172409	CLP1	-0.96937	-1.5112	-0.984974	1	1	1	protein_coding	0	0	0
ENSG00000173153	ESRRA	-1.41255	-1.63372	-0.8974	1	1	1	protein_coding	0	0	1
ENSG00000173457	PPP1R14B	-1.21535	-1.66392	-1.24465	1	1	1	protein_coding	0	0	1
ENSG00000174080	CTSF	-0.944879	-1.09856	-0.84149	1	1	1	protein_coding	0	0	1
ENSG00000175215	CTDSP2	-1.0624	-0.916742	-1.24268	1	1	1	protein_coding	1	1	1
ENSG00000175322	ZNF519	-0.934616	-0.693386	-0.623752	1	1	1	protein_coding	0	0	0
ENSG00000175348	TMEM9B	-1.29549	-1.30925	-0.77158	1	1	1	protein_coding	0	0	0
ENSG00000176087	SLC35A4	-0.849492	-0.867261	-1.0259	1	1	1	protein_coding	1	0	1
ENSG00000176490	DIRAS1	-0.82202	-1.53441	-0.76562	1	1	1	protein_coding	0	1	1
ENSG00000176834	VSIG10	-1.21393	-0.66483	-0.749895	1	1	1	protein_coding	1	0	1
ENSG00000177108	ZDHHC22	-0.760339	-1.04492	-0.879942	1	1	1	protein_coding	0	0	0
ENSG00000177889	UBE2N	-0.70471	-1.22172	-0.813943	1	1	1	protein_coding	0	1	0
ENSG00000178966	RMI1	-0.77177	-0.694857	-0.648957	1	1	1	protein_coding	0	0	0
ENSG00000180182	MED14	-0.616505	-1.0437	-0.901571	1	1	1	protein_coding	0	1	1
ENSG00000180198	RCC1	-0.973818	-1.44849	-0.881293	1	1	1	protein_coding	0	0	1
ENSG00000182004	SNRPE	-1.5067	-1.50483	-1.2057	1	1	1	protein_coding	0	0	1
ENSG00000182307	C8orf33	-0.570531	-1.11345	-0.918121	1	1	1	protein_coding	0	0	0
ENSG00000182580	EPHB3	-0.786943	-0.951801	-0.745262	1	1	1	protein_coding	0	0	0
ENSG00000182963	GJC1	-1.30635	-0.584353	-0.635423	1	1	1	protein_coding	1	0	1
ENSG00000183943	PRKX	-0.821461	-1.49133	-1.24739	1	1	1	protein_coding	0	1	0
ENSG00000184489	PTP4A3	-1.74146	-3.11516	-0.605667	1	1	1	protein_coding	0	0	0
ENSG00000184743	ATL3	-1.14955	-0.929567	-0.725364	1	1	1	protein_coding	1	1	0
ENSG00000185432	METTL7A	-0.928821	-1.26792	-0.939024	1	1	1	protein_coding	0	0	0
ENSG00000187098	MITF	-1.35728	-2.49849	-1.4607	1	1	1	protein_coding	1	0	1
ENSG00000187741	FANCA	-0.761519	-0.82033	-0.538839	1	1	1	protein_coding	0	0	0
ENSG00000188428	BLOC1S5	-1.39171	-1.83769	-1.32449	1	1	1	protein_coding	0	1	0
ENSG00000189067	LITAF	-0.746548	-1.32957	-1.74095	1	1	1	protein_coding	1	0	0
ENSG00000189362	NEMP2	-0.964297	-1.27886	-1.04927	1	1	1	protein_coding	0	0	0
ENSG00000196387	ZNF140	-0.879507	-0.619689	-0.62955	1	1	1	protein_coding	0	0	0
ENSG00000196628	TCF4	-0.978707	-0.961386	-1.09951	1	1	1	protein_coding	1	1	1
ENSG00000196865	NHLRC2	-0.588866	-1.05642	-0.550876	1	1	1	protein_coding	1	0	1
ENSG00000197122	SRC	-1.15521	-1.16363	-0.872695	1	1	1	protein_coding	0	0	1
ENSG00000197182	MIRLET7BHG	-0.967893	-1.13314	-0.549068	1	1	1	lincRNA	0	0	0
ENSG00000198087	CD2AP	-0.973781	-0.760743	-1.4131	1	1	1	protein_coding	0	1	1
ENSG00000198363	ASPH	-1.36769	-1.76212	-1.32621	1	1	1	protein_coding	0	0	1
ENSG00000198538	ZNF28	-1.05235	-1.53775	-0.717418	1	1	1	protein_coding	0	0	0
ENSG00000198964	SGMS1	-0.803887	-0.673814	-0.765866	1	1	1	protein_coding	1	1	0
ENSG00000205208	C4orf46	-1.14363	-0.797741	-0.523287	1	1	1	protein_coding	1	0	0
ENSG00000213047	DENND1B	-1.1981	-0.649425	-0.877439	1	1	1	protein_coding	0	0	0
ENSG00000214357	NEURL1B	-1.03786	-0.905667	-0.890998	1	1	1	protein_coding	1	1	1
ENSG00000219545	UMAD1	-1.55811	-2.54355	-1.69592	1	1	1	protein_coding	0	0	0
ENSG00000224940	PRRT4	-1.42837	-1.3855	-0.831776	1	1	1	protein_coding	0	0	0
ENSG00000225733	FGD5-AS1	-0.887268	-0.803299	-0.604234	1	1	1	antisense	0	0	0
ENSG00000236609	ZNF853	-0.757502	-1.60636	-0.699302	1	1	1	protein_coding	0	0	0
ENSG00000237550	RPL9P9	-0.892332	-1.14076	-0.606935	1	1	1	transcribed_processed_pseudogene	0	0	0
ENSG00000242259	C22orf39	-0.695731	-1.09422	-0.7617	1	1	1	protein_coding	0	0	0
ENSG00000249915	PDCD6	-0.896478	-1.01595	-0.624444	1	1	1	protein_coding	1	0	1
ENSG00000257103	LSM14A	-0.501846	-0.933529	-0.619217	1	1	1	protein_coding	0	0	0
ENSG00000261526	AC012615.1	-0.600864	-0.959972	-0.512708	1	1	1	lincRNA	0	0	0
ENSG00000265972	TXNIP	-1.49366	-0.607961	-0.617633	1	1	1	protein_coding	0	1	0
ENSG00000267673	FDX2	-0.593878	-0.782665	-0.86053	1	1	1	protein_coding	0	0	0
ENSG00000272742	AC135457.1	-1.55631	-1.96507	-1.0721	1	1	1	antisense	0	0	0
ENSG00000274180	NATD1	-1.25829	-1.62552	-1.20037	1	1	1	protein_coding	0	0	0
ENSG00000284024	HSPA14	-0.723196	-0.85581	-0.623483	1	1	1	protein_coding	0	0	0

## Sheet: DOWN OVERLAP 2 CELLS
Ensembl ID	Gene Symbol	L2FC_1919	L2FC_3565	L2FC_BE2C	DOWN_1919	DOWN_3565	DOWN_BE2C	Gene Type	miR-124	miR-128	miR-137
ENSG00000003989	SLC7A2	-0.736752	-1.72213	-0.978886	1	1	1	protein_coding	1	0	1
ENSG00000004700	RECQL	-1.00802	-1.23971	-1.35537	1	1	1	protein_coding	0	0	1
ENSG00000004975	DVL2	-0.707898	-0.775529	-0.833091	1	1	1	protein_coding	0	1	1
ENSG00000005022	SLC25A5	-1.19963	-1.79685	-0.939502	1	1	1	protein_coding	0	0	1
ENSG00000006459	KDM7A	-1.41327	-1.55695	-1.18273	1	1	1	protein_coding	0	0	1
ENSG00000011198	ABHD5	-1.22894	-1.34898	-0.878808	1	1	1	protein_coding	1	1	1
ENSG00000014138	POLA2	-0.983637	-1.08442	-0.565662	1	1	1	protein_coding	0	0	0
ENSG00000014164	ZC3H3	-0.524552	-0.597808	-0.518873	1	1	1	protein_coding	0	0	1
ENSG00000034510	TMSB10	-0.699983	-0.908606	-0.645793	1	1	1	protein_coding	0	1	0
ENSG00000035499	DEPDC1B	-0.659128	-0.823672	-0.606799	1	1	1	protein_coding	0	1	0
ENSG00000053254	FOXN3	-1.0512	-1.6968	-0.854532	1	1	1	protein_coding	0	1	1
ENSG00000055070	SZRD1	-1.84481	-2.242	-1.89309	1	1	1	protein_coding	0	1	0
ENSG00000055483	USP36	-0.786534	-0.559616	-0.557906	1	1	1	protein_coding	0	0	1
ENSG00000057757	PITHD1	-0.941279	-1.29222	-0.873309	1	1	1	protein_coding	0	1	0
ENSG00000058262	SEC61A1	-0.853434	-1.4461	-1.44532	1	1	1	protein_coding	0	1	0
ENSG00000060237	WNK1	-0.592458	-0.881664	-0.77935	1	1	1	protein_coding	1	1	0
ENSG00000064393	HIPK2	-1.08786	-1.53603	-0.859114	1	1	1	protein_coding	1	1	0
ENSG00000065615	CYB5R4	-0.784032	-0.542053	-0.72248	1	1	1	protein_coding	0	0	1
ENSG00000065978	YBX1	-0.576818	-0.989405	-0.580336	1	1	1	protein_coding	0	0	1
ENSG00000066322	ELOVL1	-0.900045	-1.05352	-0.913269	1	1	1	protein_coding	0	0	1
ENSG00000070831	CDC42	-1.39314	-1.28969	-0.990413	1	1	1	protein_coding	0	0	1
ENSG00000071794	HLTF	-0.901153	-1.63225	-0.890495	1	1	1	protein_coding	0	0	1
ENSG00000075303	SLC25A40	-0.895641	-0.945766	-0.502964	1	1	1	protein_coding	0	0	0
ENSG00000075539	FRYL	-0.632112	-1.00718	-0.508777	1	1	1	protein_coding	0	1	0
ENSG00000077463	SIRT6	-0.829393	-0.841492	-0.669638	1	1	1	protein_coding	0	0	1
ENSG00000077942	FBLN1	-0.545002	-0.791943	-0.92061	1	1	1	protein_coding	0	0	0
ENSG00000078246	TULP3	-1.58521	-1.39567	-1.54617	1	1	1	protein_coding	0	0	1
ENSG00000085231	AK6	-1.01039	-1.13311	-0.852817	1	1	1	protein_coding	0	0	0
ENSG00000086062	B4GALT1	-1.10432	-1.13346	-1.76646	1	1	1	protein_coding	1	0	0
ENSG00000089195	TRMT6	-0.699407	-0.750017	-0.516918	1	1	1	protein_coding	1	0	1
ENSG00000092036	HAUS4	-0.516673	-0.687798	-0.523659	1	1	1	protein_coding	0	0	0
ENSG00000092094	OSGEP	-0.875002	-0.558034	-0.540493	1	1	1	protein_coding	0	0	1
ENSG00000092621	PHGDH	-1.69255	-2.66256	-2.05201	1	1	1	protein_coding	0	1	1
ENSG00000092758	COL9A3	-1.05791	-1.49826	-1.57863	1	1	1	protein_coding	0	0	0
ENSG00000099284	H2AFY2	-0.928745	-0.900718	-0.507678	1	1	1	protein_coding	0	0	0
ENSG00000099942	CRKL	-0.954329	-1.26238	-0.55539	1	1	1	protein_coding	1	1	1
ENSG00000100422	CERK	-0.705594	-1.31082	-1.33911	1	1	1	protein_coding	0	0	1
ENSG00000100596	SPTLC2	-0.543564	-1.16923	-0.715498	1	1	1	protein_coding	1	1	1
ENSG00000100784	RPS6KA5	-0.963826	-1.58285	-0.649126	1	1	1	protein_coding	0	1	0
ENSG00000100823	APEX1	-0.557968	-0.739278	-0.562187	1	1	1	protein_coding	0	1	0
ENSG00000101189	MRGBP	-1.12062	-0.881904	-0.870637	1	1	1	protein_coding	0	0	0
ENSG00000101224	CDC25B	-0.565654	-0.571072	-0.803065	1	1	1	protein_coding	0	0	0
ENSG00000101544	ADNP2	-0.517803	-0.709787	-0.879259	1	1	1	protein_coding	1	0	0
ENSG00000101888	NXT2	-1.52717	-2.15379	-1.39775	1	1	1	protein_coding	1	1	1
ENSG00000103202	NME4	-0.552988	-1.58501	-0.662236	1	1	1	protein_coding	1	0	0
ENSG00000104081	BMF	-0.751676	-0.970656	-1.12086	1	1	1	protein_coding	1	0	0
ENSG00000104341	LAPTM4B	-1.32625	-1.69007	-2.23699	1	1	1	protein_coding	0	1	1
ENSG00000104375	STK3	-1.53846	-1.80617	-1.13538	1	1	1	protein_coding	0	0	1
ENSG00000105221	AKT2	-1.18337	-1.08324	-1.05799	1	1	1	protein_coding	1	0	1
ENSG00000105281	SLC1A5	-1.09589	-1.4555	-0.959697	1	1	1	protein_coding	0	0	1
ENSG00000105894	PTN	-0.921139	-2.22548	-1.1496	1	1	1	protein_coding	0	0	1
ENSG00000105948	TTC26	-0.769714	-1.07729	-0.588154	1	1	1	protein_coding	1	0	1
ENSG00000106003	LFNG	-0.888037	-1.11712	-1.50859	1	1	1	protein_coding	0	0	0
ENSG00000106780	MEGF9	-0.770231	-1.6392	-0.653191	1	1	1	protein_coding	0	0	1
ENSG00000108179	PPIF	-0.678154	-0.851772	-0.7483	1	1	1	protein_coding	1	1	0
ENSG00000108406	DHX40	-0.63562	-1.00836	-0.800544	1	1	1	protein_coding	0	0	1
ENSG00000109458	GAB1	-1.02105	-0.728896	-1.42948	1	1	1	protein_coding	0	1	0
ENSG00000109861	CTSC	-1.2028	-1.28613	-0.796895	1	1	1	protein_coding	0	0	0
ENSG00000110057	UNC93B1	-0.592453	-1.22568	-0.98947	1	1	1	protein_coding	0	0	1
ENSG00000110492	MDK	-0.864547	-1.05971	-0.717638	1	1	1	protein_coding	0	0	0
ENSG00000110700	RPS13	-1.11795	-1.51771	-0.614727	1	1	1	protein_coding	0	0	1
ENSG00000110900	TSPAN11	-0.833812	-1.2507	-1.96627	1	1	1	protein_coding	0	0	0
ENSG00000112062	MAPK14	-0.642409	-0.850848	-0.897205	1	1	1	protein_coding	1	1	0
ENSG00000112110	MRPL18	-0.664943	-1.29495	-0.732164	1	1	1	protein_coding	0	0	1
ENSG00000112149	CD83	-2.09131	-2.20957	-2.55895	1	1	1	protein_coding	0	0	1
ENSG00000112531	QKI	-1.1776	-2.23172	-1.16295	1	1	1	protein_coding	1	1	1
ENSG00000112851	ERBIN	-0.777395	-1.03248	-0.98631	1	1	1	protein_coding	0	0	0
ENSG00000113300	CNOT6	-0.889612	-1.09683	-0.926279	1	1	1	protein_coding	0	1	0
ENSG00000113368	LMNB1	-1.9868	-1.89373	-1.63555	1	1	1	protein_coding	0	1	1
ENSG00000113595	TRIM23	-0.723598	-1.14198	-0.699145	1	1	1	protein_coding	0	1	1
ENSG00000114786	ABHD14A-ACY1	-0.891297	-0.559907	-1.38807	1	1	1	protein_coding	0	0	0
ENSG00000114999	TTL	-1.02018	-0.934442	-0.552162	1	1	1	protein_coding	1	0	1
ENSG00000115159	GPD2	-1.64245	-1.48105	-1.30545	1	1	1	protein_coding	1	1	1
ENSG00000115641	FHL2	-1.03164	-0.520726	-0.712859	1	1	1	protein_coding	0	0	0
ENSG00000116157	GPX7	-1.86824	-2.12623	-1.66898	1	1	1	protein_coding	0	0	1
ENSG00000116670	MAD2L2	-1.2266	-1.88856	-1.28663	1	1	1	protein_coding	0	0	0
ENSG00000116747	TROVE2	-0.847069	-1.32079	-1.2897	1	1	1	protein_coding	0	0	0
ENSG00000117174	ZNHIT6	-1.35775	-1.36385	-1.17465	1	1	1	protein_coding	1	0	1
ENSG00000117298	ECE1	-1.23457	-0.934739	-1.13143	1	1	1	protein_coding	1	1	0
ENSG00000117500	TMED5	-1.02977	-1.44332	-0.680199	1	1	1	protein_coding	0	1	1
ENSG00000117650	NEK2	-1.1448	-1.15863	-0.871126	1	1	1	protein_coding	0	1	1
ENSG00000118242	MREG	-0.504449	-1.04125	-0.616463	1	1	1	protein_coding	0	0	0
ENSG00000118418	HMGN3	-0.67829	-1.10259	-1.0594	1	1	1	protein_coding	0	0	0
ENSG00000119139	TJP2	-0.970248	-0.706051	-1.23726	1	1	1	protein_coding	1	0	1
ENSG00000119328	FAM206A	-0.820439	-1.24363	-0.987114	1	1	1	protein_coding	0	0	0
ENSG00000119541	VPS4B	-0.847609	-0.64741	-0.959268	1	1	1	protein_coding	1	1	0
ENSG00000119711	ALDH6A1	-0.565029	-0.532107	-0.7262	1	1	1	protein_coding	1	0	0
ENSG00000119812	FAM98A	-0.580615	-0.834908	-0.912436	1	1	1	protein_coding	0	0	1
ENSG00000119977	TCTN3	-0.563364	-0.878061	-0.785493	1	1	1	protein_coding	0	0	1
ENSG00000120162	MOB3B	-1.34516	-1.25384	-1.1584	1	1	1	protein_coding	0	0	0
ENSG00000120253	NUP43	-0.52949	-0.691187	-0.619554	1	1	1	protein_coding	0	0	1
ENSG00000120727	PAIP2	-1.63881	-1.99253	-1.39136	1	1	1	protein_coding	0	1	0
ENSG00000120742	SERP1	-0.584388	-0.902436	-0.600737	1	1	1	protein_coding	1	0	1
ENSG00000120875	DUSP4	-1.25996	-0.687214	-0.832547	1	1	1	protein_coding	0	0	1
ENSG00000123159	GIPC1	-0.989421	-1.50817	-0.71002	1	1	1	protein_coding	0	0	1
ENSG00000124098	FAM210B	-0.813334	-1.12291	-0.701101	1	1	1	protein_coding	0	0	0
ENSG00000124767	GLO1	-0.64791	-1.13048	-0.709441	1	1	1	protein_coding	0	0	1
ENSG00000124920	MYRF	-0.966214	-0.554194	-0.971851	1	1	1	protein_coding	1	0	0
ENSG00000125656	CLPP	-0.946265	-1.89461	-1.11802	1	1	1	protein_coding	0	1	0
ENSG00000126603	GLIS2	-1.80249	-1.91281	-0.770616	1	1	1	protein_coding	1	0	1
ENSG00000128408	RIBC2	-1.08681	-0.700478	-1.09692	1	1	1	protein_coding	0	0	0
ENSG00000128791	TWSG1	-0.881155	-1.12131	-1.09783	1	1	1	protein_coding	1	0	1
ENSG00000129235	TXNDC17	-0.627598	-1.26494	-0.927296	1	1	1	protein_coding	0	0	1
ENSG00000130707	ASS1	-1.26328	-0.545412	-0.558889	1	1	1	protein_coding	0	0	0
ENSG00000131174	COX7B	-0.520154	-1.41963	-0.665725	1	1	1	protein_coding	0	1	1
ENSG00000131844	MCCC2	-0.649144	-0.681218	-0.862494	1	1	1	protein_coding	0	0	0
ENSG00000132294	EFR3A	-0.871261	-0.922104	-0.992168	1	1	1	protein_coding	0	1	1
ENSG00000132475	H3F3B	-0.885352	-1.03743	-0.708855	1	1	1	protein_coding	0	1	1
ENSG00000133103	COG6	-0.788192	-1.06756	-0.939104	1	1	1	protein_coding	0	0	0
ENSG00000134247	PTGFRN	-1.00486	-1.61624	-1.10787	1	1	1	protein_coding	0	1	1
ENSG00000134291	TMEM106C	-0.752951	-0.61532	-0.567852	1	1	1	protein_coding	0	0	0
ENSG00000134317	GRHL1	-0.865323	-0.842252	-0.794635	1	1	1	protein_coding	0	0	0
ENSG00000134698	AGO4	-1.11767	-0.904494	-0.646854	1	1	1	protein_coding	0	0	0
ENSG00000135093	USP30	-0.735638	-0.504687	-0.763307	1	1	1	protein_coding	1	0	1
ENSG00000135097	MSI1	-1.06652	-1.68727	-1.33992	1	1	1	protein_coding	0	1	1
ENSG00000135108	FBXO21	-0.679631	-0.604744	-1.018	1	1	1	protein_coding	0	1	0
ENSG00000135250	SRPK2	-0.595571	-0.86229	-0.530349	1	1	1	protein_coding	0	1	0
ENSG00000135617	PRADC1	-1.30543	-1.38193	-1.17238	1	1	1	protein_coding	0	0	0
ENSG00000135776	ABCB10	-0.629269	-2.03115	-1.53184	1	1	1	protein_coding	0	0	0
ENSG00000136044	APPL2	-1.86017	-1.40327	-1.65026	1	1	1	protein_coding	0	0	1
ENSG00000138386	NAB1	-1.07771	-1.01707	-1.21366	1	1	1	protein_coding	0	0	1
ENSG00000138434	ITPRID2	-0.593994	-0.523434	-0.945532	1	1	1	protein_coding	0	0	0
ENSG00000138439	FAM117B	-1.00753	-1.24836	-0.698864	1	1	1	protein_coding	0	0	1
ENSG00000139218	SCAF11	-0.63553	-0.658358	-0.572502	1	1	1	protein_coding	0	0	0
ENSG00000139433	GLTP	-0.653827	-0.62187	-0.935237	1	1	1	protein_coding	1	1	0
ENSG00000139880	CDH24	-0.962434	-0.723953	-0.929218	1	1	1	protein_coding	0	1	0
ENSG00000139921	TMX1	-1.20627	-1.20813	-1.29661	1	1	1	protein_coding	0	1	1
ENSG00000140262	TCF12	-0.588445	-1.17683	-0.545334	1	1	1	protein_coding	0	0	1
ENSG00000140564	FURIN	-1.12933	-0.853622	-0.636899	1	1	1	protein_coding	1	1	1
ENSG00000141179	PCTP	-1.24604	-0.97939	-1.29949	1	1	1	protein_coding	0	0	1
ENSG00000141349	G6PC3	-0.804231	-1.33251	-1.40783	1	1	1	protein_coding	0	1	0
ENSG00000141380	SS18	-1.92396	-1.73545	-1.60338	1	1	1	protein_coding	0	1	1
ENSG00000142327	RNPEPL1	-0.80779	-1.28694	-0.548584	1	1	1	protein_coding	1	1	0
ENSG00000142676	RPL11	-1.15726	-1.53639	-0.745368	1	1	1	protein_coding	0	0	1
ENSG00000143416	SELENBP1	-0.516752	-0.605099	-0.801879	1	1	1	protein_coding	0	0	0
ENSG00000143476	DTL	-1.09039	-1.18376	-0.660753	1	1	1	protein_coding	0	0	1
ENSG00000144455	SUMF1	-0.652376	-0.517512	-1.37754	1	1	1	protein_coding	1	0	0
ENSG00000146556	WASH2P	-0.668568	-0.624029	-0.591012	1	1	1	transcribed_unprocessed_pseudogene	0	0	0
ENSG00000146648	EGFR	-1.3754	-1.83236	-1.45109	1	1	1	protein_coding	0	1	1
ENSG00000147536	GINS4	-0.641617	-0.640805	-0.552715	1	1	1	protein_coding	0	0	0
ENSG00000147862	NFIB	-0.748522	-0.918442	-0.840744	1	1	1	protein_coding	1	1	1
ENSG00000148153	INIP	-0.727698	-0.76126	-0.518547	1	1	1	protein_coding	0	0	0
ENSG00000148411	NACC2	-1.22153	-0.938275	-0.566307	1	1	1	protein_coding	1	1	1
ENSG00000149679	CABLES2	-1.6682	-0.882452	-1.25153	1	1	1	protein_coding	0	1	1
ENSG00000149923	PPP4C	-0.559587	-0.807776	-0.721502	1	1	1	protein_coding	0	1	0
ENSG00000150433	TMEM218	-0.922029	-1.02926	-0.894535	1	1	1	protein_coding	0	0	1
ENSG00000151576	QTRT2	-0.577031	-0.853237	-0.512067	1	1	1	protein_coding	0	0	0
ENSG00000153006	SREK1IP1	-0.772528	-1.14072	-0.881825	1	1	1	protein_coding	1	0	0
ENSG00000153944	MSI2	-0.944338	-1.30284	-1.23712	1	1	1	protein_coding	0	1	1
ENSG00000154059	IMPACT	-0.57508	-1.01122	-0.851211	1	1	1	protein_coding	1	0	1
ENSG00000154153	RETREG1	-0.61379	-0.930692	-1.18045	1	1	1	protein_coding	0	0	0
ENSG00000154511	FAM69A	-0.687813	-0.915535	-0.602515	1	1	1	protein_coding	0	0	0
ENSG00000154920	EME1	-0.695633	-0.930359	-0.598831	1	1	1	protein_coding	0	0	0
ENSG00000156162	DPY19L4	-0.961413	-0.806721	-0.801429	1	1	1	protein_coding	1	0	0
ENSG00000156374	PCGF6	-0.626336	-1.11448	-0.599816	1	1	1	protein_coding	0	0	1
ENSG00000156398	SFXN2	-1.24948	-0.699826	-0.772323	1	1	1	protein_coding	0	1	0
ENSG00000156531	PHF6	-1.27525	-1.63102	-1.3647	1	1	1	protein_coding	1	1	0
ENSG00000157191	NECAP2	-0.548804	-0.857551	-0.554069	1	1	1	protein_coding	1	0	0
ENSG00000158402	CDC25C	-0.554518	-0.742523	-0.812673	1	1	1	protein_coding	0	0	0
ENSG00000159423	ALDH4A1	-1.26501	-1.16819	-1.1977	1	1	1	protein_coding	0	1	0
ENSG00000160014	CALM3	-0.970541	-0.965104	-0.901606	1	1	1	protein_coding	0	0	1
ENSG00000160216	AGPAT3	-0.875011	-0.911877	-0.640642	1	1	1	protein_coding	0	1	1
ENSG00000160563	MED27	-0.86257	-1.34952	-0.890445	1	1	1	protein_coding	0	0	1
ENSG00000161642	ZNF385A	-2.86959	-2.91739	-2.62028	1	1	1	protein_coding	0	1	1
ENSG00000161920	MED11	-1.82221	-2.55241	-1.1588	1	1	1	protein_coding	0	0	1
ENSG00000162437	RAVER2	-0.980371	-0.7201	-0.662224	1	1	1	protein_coding	1	0	1
ENSG00000162734	PEA15	-1.2358	-1.57032	-0.881371	1	1	1	protein_coding	0	0	0
ENSG00000162738	VANGL2	-0.966735	-1.32146	-1.12262	1	1	1	protein_coding	1	1	0
ENSG00000162878	PKDCC	-0.710491	-0.612484	-0.746121	1	1	1	protein_coding	0	0	1
ENSG00000163389	POGLUT1	-0.629842	-0.574901	-0.938468	1	1	1	protein_coding	1	1	0
ENSG00000163605	PPP4R2	-0.55369	-0.900022	-0.68263	1	1	1	protein_coding	0	1	1
ENSG00000163682	RPL9	-0.898597	-1.24827	-0.583954	1	1	1	protein_coding	0	0	1
ENSG00000163785	RYK	-1.49	-1.15738	-1.01402	1	1	1	protein_coding	1	0	1
ENSG00000163788	SNRK	-0.738152	-0.729951	-0.773716	1	1	1	protein_coding	0	0	0
ENSG00000163807	KIAA1143	-1.26166	-1.56832	-0.658991	1	1	1	protein_coding	0	0	0
ENSG00000163832	ELP6	-0.811377	-1.49718	-1.10467	1	1	1	protein_coding	0	0	0
ENSG00000163884	KLF15	-1.26632	-1.31383	-1.01782	1	1	1	protein_coding	1	0	1
ENSG00000164300	SERINC5	-0.576349	-0.639676	-0.555769	1	1	1	protein_coding	0	0	0
ENSG00000164332	UBLCP1	-0.602331	-0.62117	-0.659354	1	1	1	protein_coding	0	0	1
ENSG00000164649	CDCA7L	-0.620174	-1.22348	-0.671925	1	1	1	protein_coding	0	0	1
ENSG00000165355	FBXO33	-1.04776	-1.18847	-1.06907	1	1	1	protein_coding	0	1	1
ENSG00000165795	NDRG2	-1.02324	-0.768773	-1.23342	1	1	1	protein_coding	0	0	0
ENSG00000165895	ARHGAP42	-0.893624	-1.98766	-1.39956	1	1	1	protein_coding	0	0	1
ENSG00000166224	SGPL1	-1.27437	-1.47257	-1.51109	1	1	1	protein_coding	1	0	1
ENSG00000166272	WBP1L	-1.40095	-1.12863	-1.21255	1	1	1	protein_coding	0	1	0
ENSG00000166402	TUB	-0.856844	-1.28686	-0.859427	1	1	1	protein_coding	1	1	0
ENSG00000166483	WEE1	-0.775638	-0.514221	-1.01641	1	1	1	protein_coding	0	1	0
ENSG00000166681	BEX3	-0.657042	-1.365	-1.32025	1	1	1	protein_coding	0	0	0
ENSG00000166831	RBPMS2	-1.53479	-2.29453	-2.50671	1	1	1	protein_coding	0	1	0
ENSG00000166913	YWHAB	-0.635894	-0.708524	-0.778932	1	1	1	protein_coding	0	1	0
ENSG00000167085	PHB	-0.607788	-1.31413	-0.88122	1	1	1	protein_coding	0	1	0
ENSG00000167220	HDHD2	-0.633466	-1.41146	-0.762364	1	1	1	protein_coding	0	0	0
ENSG00000167397	VKORC1	-0.788218	-1.14332	-0.810177	1	1	1	protein_coding	0	0	1
ENSG00000167771	RCOR2	-0.991708	-1.27889	-0.87085	1	1	1	protein_coding	0	0	1
ENSG00000168214	RBPJ	-1.36708	-1.32191	-1.135	1	1	1	protein_coding	0	0	1
ENSG00000168283	BMI1	-1.07381	-0.750491	-0.798292	1	1	1	protein_coding	0	1	0
ENSG00000168710	AHCYL1	-1.02098	-1.67121	-0.911555	1	1	1	protein_coding	0	0	1
ENSG00000169299	PGM2	-0.710281	-1.19103	-0.763207	1	1	1	protein_coding	0	0	0
ENSG00000169764	UGP2	-0.890058	-0.677941	-0.756955	1	1	1	protein_coding	0	0	1
ENSG00000170185	USP38	-0.680118	-0.70061	-0.536566	1	1	1	protein_coding	1	0	1
ENSG00000171016	PYGO1	-1.05946	-0.711593	-0.647511	1	1	1	protein_coding	0	0	1
ENSG00000171320	ESCO2	-1.60385	-1.83274	-1.59022	1	1	1	protein_coding	0	0	1
ENSG00000171604	CXXC5	-1.0152	-0.569462	-0.503082	1	1	1	protein_coding	0	0	0
ENSG00000171792	RHNO1	-1.14259	-0.958687	-0.728745	1	1	1	protein_coding	0	0	0
ENSG00000172057	ORMDL3	-1.07546	-0.837259	-0.772474	1	1	1	protein_coding	0	0	0
ENSG00000172409	CLP1	-0.96937	-1.5112	-0.984974	1	1	1	protein_coding	0	0	0
ENSG00000173153	ESRRA	-1.41255	-1.63372	-0.8974	1	1	1	protein_coding	0	0	1
ENSG00000173457	PPP1R14B	-1.21535	-1.66392	-1.24465	1	1	1	protein_coding	0	0	1
ENSG00000174080	CTSF	-0.944879	-1.09856	-0.84149	1	1	1	protein_coding	0	0	1
ENSG00000175215	CTDSP2	-1.0624	-0.916742	-1.24268	1	1	1	protein_coding	1	1	1
ENSG00000175322	ZNF519	-0.934616	-0.693386	-0.623752	1	1	1	protein_coding	0	0	0
ENSG00000175348	TMEM9B	-1.29549	-1.30925	-0.77158	1	1	1	protein_coding	0	0	0
ENSG00000176087	SLC35A4	-0.849492	-0.867261	-1.0259	1	1	1	protein_coding	1	0	1
ENSG00000176490	DIRAS1	-0.82202	-1.53441	-0.76562	1	1	1	protein_coding	0	1	1
ENSG00000176834	VSIG10	-1.21393	-0.66483	-0.749895	1	1	1	protein_coding	1	0	1
ENSG00000177108	ZDHHC22	-0.760339	-1.04492	-0.879942	1	1	1	protein_coding	0	0	0
ENSG00000177889	UBE2N	-0.70471	-1.22172	-0.813943	1	1	1	protein_coding	0	1	0
ENSG00000178966	RMI1	-0.77177	-0.694857	-0.648957	1	1	1	protein_coding	0	0	0
ENSG00000180182	MED14	-0.616505	-1.0437	-0.901571	1	1	1	protein_coding	0	1	1
ENSG00000180198	RCC1	-0.973818	-1.44849	-0.881293	1	1	1	protein_coding	0	0	1
ENSG00000182004	SNRPE	-1.5067	-1.50483	-1.2057	1	1	1	protein_coding	0	0	1
ENSG00000182307	C8orf33	-0.570531	-1.11345	-0.918121	1	1	1	protein_coding	0	0	0
ENSG00000182580	EPHB3	-0.786943	-0.951801	-0.745262	1	1	1	protein_coding	0	0	0
ENSG00000182963	GJC1	-1.30635	-0.584353	-0.635423	1	1	1	protein_coding	1	0	1
ENSG00000183943	PRKX	-0.821461	-1.49133	-1.24739	1	1	1	protein_coding	0	1	0
ENSG00000184489	PTP4A3	-1.74146	-3.11516	-0.605667	1	1	1	protein_coding	0	0	0
ENSG00000184743	ATL3	-1.14955	-0.929567	-0.725364	1	1	1	protein_coding	1	1	0
ENSG00000185432	METTL7A	-0.928821	-1.26792	-0.939024	1	1	1	protein_coding	0	0	0
ENSG00000187098	MITF	-1.35728	-2.49849	-1.4607	1	1	1	protein_coding	1	0	1
ENSG00000187741	FANCA	-0.761519	-0.82033	-0.538839	1	1	1	protein_coding	0	0	0
ENSG00000188428	BLOC1S5	-1.39171	-1.83769	-1.32449	1	1	1	protein_coding	0	1	0
ENSG00000189067	LITAF	-0.746548	-1.32957	-1.74095	1	1	1	protein_coding	1	0	0
ENSG00000189362	NEMP2	-0.964297	-1.27886	-1.04927	1	1	1	protein_coding	0	0	0
ENSG00000196387	ZNF140	-0.879507	-0.619689	-0.62955	1	1	1	protein_coding	0	0	0
ENSG00000196628	TCF4	-0.978707	-0.961386	-1.09951	1	1	1	protein_coding	1	1	1
ENSG00000196865	NHLRC2	-0.588866	-1.05642	-0.550876	1	1	1	protein_coding	1	0	1
ENSG00000197122	SRC	-1.15521	-1.16363	-0.872695	1	1	1	protein_coding	0	0	1
ENSG00000197182	MIRLET7BHG	-0.967893	-1.13314	-0.549068	1	1	1	lincRNA	0	0	0
ENSG00000198087	CD2AP	-0.973781	-0.760743	-1.4131	1	1	1	protein_coding	0	1	1
ENSG00000198363	ASPH	-1.36769	-1.76212	-1.32621	1	1	1	protein_coding	0	0	1
ENSG00000198538	ZNF28	-1.05235	-1.53775	-0.717418	1	1	1	protein_coding	0	0	0
ENSG00000198964	SGMS1	-0.803887	-0.673814	-0.765866	1	1	1	protein_coding	1	1	0
ENSG00000205208	C4orf46	-1.14363	-0.797741	-0.523287	1	1	1	protein_coding	1	0	0
ENSG00000213047	DENND1B	-1.1981	-0.649425	-0.877439	1	1	1	protein_coding	0	0	0
ENSG00000214357	NEURL1B	-1.03786	-0.905667	-0.890998	1	1	1	protein_coding	1	1	1
ENSG00000219545	UMAD1	-1.55811	-2.54355	-1.69592	1	1	1	protein_coding	0	0	0
ENSG00000224940	PRRT4	-1.42837	-1.3855	-0.831776	1	1	1	protein_coding	0	0	0
ENSG00000225733	FGD5-AS1	-0.887268	-0.803299	-0.604234	1	1	1	antisense	0	0	0
ENSG00000236609	ZNF853	-0.757502	-1.60636	-0.699302	1	1	1	protein_coding	0	0	0
ENSG00000237550	RPL9P9	-0.892332	-1.14076	-0.606935	1	1	1	transcribed_processed_pseudogene	0	0	0
ENSG00000242259	C22orf39	-0.695731	-1.09422	-0.7617	1	1	1	protein_coding	0	0	0
ENSG00000249915	PDCD6	-0.896478	-1.01595	-0.624444	1	1	1	protein_coding	1	0	1
ENSG00000257103	LSM14A	-0.501846	-0.933529	-0.619217	1	1	1	protein_coding	0	0	0
ENSG00000261526	AC012615.1	-0.600864	-0.959972	-0.512708	1	1	1	lincRNA	0	0	0
ENSG00000265972	TXNIP	-1.49366	-0.607961	-0.617633	1	1	1	protein_coding	0	1	0
ENSG00000267673	FDX2	-0.593878	-0.782665	-0.86053	1	1	1	protein_coding	0	0	0
ENSG00000272742	AC135457.1	-1.55631	-1.96507	-1.0721	1	1	1	antisense	0	0	0
ENSG00000274180	NATD1	-1.25829	-1.62552	-1.20037	1	1	1	protein_coding	0	0	0
ENSG00000284024	HSPA14	-0.723196	-0.85581	-0.623483	1	1	1	protein_coding	0	0	0
ENSG00000011347	SYT7	0	-1.49715	-0.714509	0	1	1	protein_coding	0	0	1
ENSG00000018625	ATP1A2	-3.78892	-3.71532	0	1	1	0	protein_coding	0	0	0
ENSG00000056998	GYG2	-0.819106	-1.34825	0	1	1	0	protein_coding	0	0	0
ENSG00000078900	TP73	-1.1362	0	-0.873517	1	0	1	protein_coding	0	0	0
ENSG00000079215	SLC1A3	-0.583997	-2.06713	0	1	1	0	protein_coding	0	0	0
ENSG00000088881	EBF4	-0.634736	-0.679405	0	1	1	0	protein_coding	0	0	0
ENSG00000100196	KDELR3	-0.910653	-1.60533	0	1	1	0	protein_coding	0	0	1
ENSG00000105711	SCN1B	-2.0394	-2.5398	0	1	1	0	protein_coding	0	0	1
ENSG00000106624	AEBP1	0	-0.556666	-0.686843	0	1	1	protein_coding	0	0	0
ENSG00000106868	SUSD1	0	-0.510331	-1.01384	0	1	1	protein_coding	0	0	0
ENSG00000112559	MDFI	-1.65719	-2.39927	0	1	1	0	protein_coding	0	1	0
ENSG00000114378	HYAL1	0	-1.43909	-1.98505	0	1	1	protein_coding	0	0	0
ENSG00000126882	FAM78A	-0.78881	-1.07239	0	1	1	0	protein_coding	1	1	1
ENSG00000134817	APLNR	0	-2.69229	-1.58974	0	1	1	protein_coding	0	1	0
ENSG00000136205	TNS3	-0.631927	-1.56854	0	1	1	0	protein_coding	0	0	0
ENSG00000145365	TIFA	-0.897151	0	-1.46711	1	0	1	protein_coding	0	0	0
ENSG00000148204	CRB2	0	-1.05751	-1.11642	0	1	1	protein_coding	0	0	0
ENSG00000148400	NOTCH1	-0.759178	-0.588503	0	1	1	0	protein_coding	0	0	0
ENSG00000161896	IP6K3	-1.01525	-0.814256	0	1	1	0	protein_coding	0	0	0
ENSG00000162068	NTN3	0	-1.61667	-1.17029	0	1	1	protein_coding	0	0	0
ENSG00000163453	IGFBP7	-0.925363	0	-1.05038	1	0	1	protein_coding	0	0	0
ENSG00000164591	MYOZ3	0	-0.947286	-1.23314	0	1	1	protein_coding	0	0	0
ENSG00000166289	PLEKHF1	-0.766273	-0.673332	0	1	1	0	protein_coding	0	0	0
ENSG00000166682	TMPRSS5	-0.728233	-0.835848	0	1	1	0	protein_coding	0	0	0
ENSG00000167992	VWCE	-1.18809	-0.753058	0	1	1	0	protein_coding	0	0	0
ENSG00000172889	EGFL7	-0.591536	-1.56906	0	1	1	0	protein_coding	0	0	0
ENSG00000173442	EHBP1L1	-1.75419	-1.02298	0	1	1	0	protein_coding	0	0	1
ENSG00000180139	ACTA2-AS1	-2.78827	-1.10722	0	1	1	0	antisense	0	0	0
ENSG00000180884	ZNF792	0	-0.94328	-0.774066	0	1	1	protein_coding	0	0	0
ENSG00000182247	UBE2E2	-1.08744	-1.8204	0	1	1	0	protein_coding	0	1	0
ENSG00000188338	SLC38A3	-1.30775	-1.84744	0	1	1	0	protein_coding	0	0	0
ENSG00000198959	TGM2	0	-1.97501	-1.27624	0	1	1	protein_coding	0	0	0
ENSG00000232093	DCST1-AS1	-1.20212	-1.12561	0	1	1	0	antisense	0	0	0
ENSG00000235893	BX284632.1	-0.934779	-0.951675	0	1	1	0	processed_pseudogene	0	0	0
ENSG00000241697	TMEFF1	0	-1.00076	-0.819488	0	1	1	protein_coding	0	1	0
ENSG00000241978	AKAP2	-2.08094	-1.11344	0	1	1	0	protein_coding	0	0	0
ENSG00000248643	RBM14-RBM4	0	-0.757928	-0.516886	0	1	1	protein_coding	0	0	0
ENSG00000260293	AC106820.4	0	-0.899374	-0.796139	0	1	1	sense_intronic	0	0	0
ENSG00000267500	ZNF887P	-1.54307	0	-0.572279	1	0	1	transcribed_unprocessed_pseudogene	0	0	0
ENSG00000275437	AL121832.3	-1.19719	-0.934471	0	1	1	0	sense_intronic	0	0	0
ENSG00000277801	AL138478.1	-1.59735	-5.79254	0	1	1	0	lincRNA	0	0	0
ENSG00000279595	AC126335.2	-0.926779	0	-0.701057	1	0	1	TEC	0	0	0
ENSG00000280123	AC023632.6	0	-0.89331	-1.12489	0	1	1	TEC	0	0	0
ENSG00000282933	RHOXF1P3	0	-0.751355	-0.642001	0	1	1	transcribed_unprocessed_pseudogene	0	0	0
ENSG00000076770	MBNL3	-0.727717	0	-0.82853	1	0	1	protein_coding	1	0	0
ENSG00000100427	MLC1	-0.580792	-1.04134	0	1	1	0	protein_coding	0	0	1
ENSG00000105697	HAMP	0	-1.31214	-1.27382	0	1	1	protein_coding	0	0	0
ENSG00000107562	CXCL12	0	-1.70678	-2.97535	0	1	1	protein_coding	0	0	1
ENSG00000130304	SLC27A1	-0.668529	-0.753053	0	1	1	0	protein_coding	1	0	0
ENSG00000134668	SPOCD1	-1.09217	-0.858469	0	1	1	0	protein_coding	0	0	0
ENSG00000144452	ABCA12	-1.40498	0	-0.904264	1	0	1	protein_coding	0	1	0
ENSG00000146950	SHROOM2	-1.79745	-1.05965	0	1	1	0	protein_coding	0	0	1
ENSG00000162511	LAPTM5	-0.974043	-1.05576	0	1	1	0	protein_coding	0	0	1
ENSG00000166578	IQCD	-0.69966	-2.57916	0	1	1	0	protein_coding	0	0	0
ENSG00000167034	NKX3-1	-1.16768	0	-1.13137	1	0	1	protein_coding	0	0	0
ENSG00000167244	IGF2	-1.53627	0	-0.792726	1	0	1	protein_coding	0	0	0
ENSG00000168477	TNXB	-1.01754	-0.693436	0	1	1	0	protein_coding	0	0	0
ENSG00000168938	PPIC	-0.511414	-0.529302	0	1	1	0	protein_coding	0	0	1
ENSG00000175899	A2M	-0.778757	-1.73255	0	1	1	0	protein_coding	0	0	0
ENSG00000184160	ADRA2C	0	-0.778866	-0.509624	0	1	1	protein_coding	0	0	0
ENSG00000186998	EMID1	-1.00439	-1.50077	0	1	1	0	protein_coding	0	0	0
ENSG00000223839	FAM95B1	-1.41745	0	-1.91096	1	0	1	lincRNA	0	0	0
ENSG00000260807	AC009041.2	-1.25031	-2.59946	0	1	1	0	lincRNA	0	0	0
ENSG00000004455	AK2	-0.718707	-1.67996	-0.424278	1	1	0	protein_coding	1	1	0
ENSG00000004487	KDM1A	-0.49359	-0.95879	-0.629217	0	1	1	protein_coding	0	0	1
ENSG00000005513	SOX8	-1.09907	-3.59023	0	1	1	0	protein_coding	1	0	0
ENSG00000010292	NCAPD2	-0.335765	-0.816074	-0.721457	0	1	1	protein_coding	0	0	0
ENSG00000010704	HFE	-0.798079	-0.761257	0	1	1	0	protein_coding	0	0	0
ENSG00000011332	DPF1	0	-0.510139	-0.511886	0	1	1	protein_coding	0	0	0
ENSG00000012171	SEMA3B	-1.31138	-0.824945	0	1	1	0	protein_coding	0	0	0
ENSG00000013297	CLDN11	0	-2.71756	-1.36985	0	1	1	protein_coding	0	0	1
ENSG00000015475	BID	-0.563803	-1.13177	-0.397023	1	1	0	protein_coding	1	0	0
ENSG00000023608	SNAPC1	-0.570311	-1.29262	0	1	1	0	protein_coding	0	0	1
ENSG00000048392	RRM2B	-1.05335	-1.58499	-0.395729	1	1	0	protein_coding	1	0	1
ENSG00000053371	AKR7A2	-0.241312	-0.562232	-0.774295	0	1	1	protein_coding	0	0	0
ENSG00000054965	FAM168A	-0.736858	-1.23704	-0.273747	1	1	0	protein_coding	0	0	1
ENSG00000054967	RELT	-0.67207	-0.909568	-0.282049	1	1	0	protein_coding	0	0	0
ENSG00000058804	NDC1	-0.539463	-0.912871	-0.390572	1	1	0	protein_coding	0	0	0
ENSG00000060138	YBX3	-0.571049	-1.02576	0	1	1	0	protein_coding	0	0	0
ENSG00000060762	MPC1	0	-0.656836	-0.652983	0	1	1	protein_coding	0	0	0
ENSG00000063176	SPHK2	-0.931025	-0.888743	-0.423519	1	1	0	protein_coding	0	0	1
ENSG00000063660	GPC1	0.160578	-0.501975	-0.588267	0	1	1	protein_coding	1	0	0
ENSG00000063978	RNF4	-0.934891	-0.978101	-0.311775	1	1	0	protein_coding	0	0	1
ENSG00000064042	LIMCH1	-0.514831	-0.433841	-0.693033	1	0	1	protein_coding	1	0	1
ENSG00000064666	CNN2	-1.40962	-2.46847	0	1	1	0	protein_coding	0	0	1
ENSG00000065054	SLC9A3R2	-0.584772	-0.761487	0	1	1	0	protein_coding	0	0	1
ENSG00000065485	PDIA5	-0.341575	-1.19597	-1.17258	0	1	1	protein_coding	0	1	0
ENSG00000065717	TLE2	-0.713631	-1.13269	0	1	1	0	protein_coding	0	0	0
ENSG00000065911	MTHFD2	-0.576867	-1.2896	-0.42213	1	1	0	protein_coding	0	0	1
ENSG00000065989	PDE4A	-0.555371	-0.670094	0	1	1	0	protein_coding	1	0	1
ENSG00000066230	SLC9A3	-0.510713	-0.53237	0	1	1	0	protein_coding	0	0	0
ENSG00000066855	MTFR1	-0.690988	-1.24447	-0.497403	1	1	0	protein_coding	0	0	1
ENSG00000067842	ATP2B3	0	-1.53652	-1.08195	0	1	1	protein_coding	0	0	0
ENSG00000067955	CBFB	-1.01906	-0.724908	-0.495892	1	1	0	protein_coding	1	1	0
ENSG00000068489	PRR11	0	-1.13426	-0.760461	0	1	1	protein_coding	0	0	1
ENSG00000068912	ERLEC1	0	-0.503403	-0.589983	0	1	1	protein_coding	0	0	0
ENSG00000069509	FUNDC1	-0.604417	-0.631553	-0.486701	1	1	0	protein_coding	0	0	1
ENSG00000069974	RAB27A	-0.718488	0	-0.665759	1	0	1	protein_coding	1	1	0
ENSG00000070614	NDST1	-0.671615	-0.339563	-0.60497	1	0	1	protein_coding	1	1	1
ENSG00000070731	ST6GALNAC2	-2.58966	-1.69159	0	1	1	0	protein_coding	0	0	0
ENSG00000071051	NCK2	-0.715974	-0.216155	-0.756677	1	0	1	protein_coding	0	0	1
ENSG00000071564	TCF3	-0.25263	-1.19296	-0.543162	0	1	1	protein_coding	1	0	1
ENSG00000072135	PTPN18	-0.525451	-0.357462	-0.641855	1	0	1	protein_coding	0	0	0
ENSG00000072401	UBE2D1	0	-0.935309	-0.62062	0	1	1	protein_coding	0	1	0
ENSG00000074657	ZNF532	-0.722905	-0.863787	-0.355795	1	1	0	protein_coding	0	0	0
ENSG00000075223	SEMA3C	0	-2.71627	-0.503201	0	1	1	protein_coding	0	0	0
ENSG00000078549	ADCYAP1R1	0	-0.665866	-1.27485	0	1	1	protein_coding	0	0	0
ENSG00000080644	CHRNA3	-1.23814	-0.879746	-0.429668	1	1	0	protein_coding	0	0	0
ENSG00000084628	NKAIN1	0	-1.41993	-0.670345	0	1	1	protein_coding	0	0	1
ENSG00000084693	AGBL5	-0.578021	-0.644864	-0.225069	1	1	0	protein_coding	0	0	0
ENSG00000085185	BCORL1	-0.639386	-0.692238	-0.429506	1	1	0	protein_coding	0	1	1
ENSG00000085840	ORC1	-0.513592	-0.72338	-0.293543	1	1	0	protein_coding	0	0	0
ENSG00000087510	TFAP2C	-1.1223	-0.799924	0	1	1	0	protein_coding	0	0	0
ENSG00000088836	SLC4A11	-0.739799	-0.99409	0	1	1	0	protein_coding	0	0	0
ENSG00000088882	CPXM1	0	-0.674067	-0.848857	0	1	1	protein_coding	0	0	0
ENSG00000089050	RBBP9	-0.828266	-0.393617	-0.606614	1	0	1	protein_coding	0	0	1
ENSG00000089157	RPLP0	-0.526357	-0.728669	-0.180437	1	1	0	protein_coding	0	0	0
ENSG00000090487	SPG21	-0.489943	-0.778106	-0.556973	0	1	1	protein_coding	0	0	0
ENSG00000091039	OSBPL8	-0.798402	-0.501871	-0.255168	1	1	0	protein_coding	1	0	1
ENSG00000092853	CLSPN	-0.533537	-0.510625	-0.477007	1	1	0	protein_coding	0	0	1
ENSG00000093009	CDC45	-0.866673	-0.563092	0	1	1	0	protein_coding	0	0	0
ENSG00000095002	MSH2	-0.568327	-0.4075	-0.810795	1	0	1	protein_coding	0	0	1
ENSG00000099250	NRP1	0	-1.09453	-0.67348	0	1	1	protein_coding	1	0	1
ENSG00000099617	EFNA2	-1.20798	-2.19146	0	1	1	0	protein_coding	0	1	1
ENSG00000099822	HCN2	-1.66266	-2.57997	0	1	1	0	protein_coding	0	0	1
ENSG00000099869	IGF2-AS	-2.17426	0	-1.21014	1	0	1	antisense	0	0	0
ENSG00000099899	TRMT2A	-0.474733	-1.00303	-0.553826	0	1	1	protein_coding	0	1	0
ENSG00000099901	RANBP1	-0.405914	-1.0035	-0.505162	0	1	1	protein_coding	0	0	1
ENSG00000099958	DERL3	-0.630347	-0.629618	0	1	1	0	protein_coding	0	0	0
ENSG00000100129	EIF3L	-0.631669	-0.774852	-0.296091	1	1	0	protein_coding	0	0	0
ENSG00000100162	CENPM	-0.879996	-1.01062	-0.419126	1	1	0	protein_coding	0	0	0
ENSG00000100285	NEFH	-0.850461	-1.15895	0	1	1	0	protein_coding	0	0	1
ENSG00000100292	HMOX1	-1.42692	-1.57204	0	1	1	0	protein_coding	0	0	0
ENSG00000100316	RPL3	-0.67233	-0.981405	-0.421418	1	1	0	protein_coding	0	0	0
ENSG00000100336	APOL4	-0.903868	-0.919396	0	1	1	0	protein_coding	0	0	0
ENSG00000100379	KCTD17	0	-0.740611	-0.738694	0	1	1	protein_coding	0	0	0
ENSG00000100380	ST13	-0.777892	-0.881065	-0.440883	1	1	0	protein_coding	0	0	1
ENSG00000100445	SDR39U1	-0.415936	-0.569251	-0.87576	0	1	1	protein_coding	0	0	1
ENSG00000100802	C14orf93	-0.515841	-0.831174	-0.355429	1	1	0	protein_coding	0	0	0
ENSG00000100814	CCNB1IP1	-0.615603	-0.806657	0	1	1	0	protein_coding	0	0	0
ENSG00000101104	PABPC1L	-0.530633	0	-0.696666	1	0	1	protein_coding	0	0	0
ENSG00000101190	TCFL5	-1.06344	-1.01835	0	1	1	0	protein_coding	0	0	1
ENSG00000101412	E2F1	-0.707798	-1.13278	-0.114004	1	1	0	protein_coding	0	0	0
ENSG00000102699	PARP4	-0.528393	0	-0.729713	1	0	1	protein_coding	0	0	0
ENSG00000103365	GGA2	-0.542264	-0.778703	-0.424955	1	1	0	protein_coding	1	1	0
ENSG00000103995	CEP152	-0.60999	0	-0.58758	1	0	1	protein_coding	0	0	0
ENSG00000104267	CA2	-0.844583	-3.01342	0	1	1	0	protein_coding	0	0	0
ENSG00000104343	UBE2W	0	-0.589216	-0.500187	0	1	1	protein_coding	1	1	0
ENSG00000104870	FCGRT	0	-0.533304	-0.862085	0	1	1	protein_coding	0	0	0
ENSG00000104886	PLEKHJ1	-0.345109	-0.700959	-0.52643	0	1	1	protein_coding	0	0	0
ENSG00000105011	ASF1B	-0.996013	-0.629832	-0.484992	1	1	0	protein_coding	0	0	0
ENSG00000105088	OLFM2	-0.881349	-2.29538	0	1	1	0	protein_coding	0	0	0
ENSG00000105173	CCNE1	-0.301014	-0.711216	-0.620548	0	1	1	protein_coding	0	0	0
ENSG00000105707	HPN	-3.26596	-2.45297	0	1	1	0	protein_coding	0	0	0
ENSG00000106004	HOXA5	-1.21952	-0.684999	0	1	1	0	protein_coding	1	1	0
ENSG00000106333	PCOLCE	-0.215349	-1.15817	-0.604009	0	1	1	protein_coding	0	0	0
ENSG00000107796	ACTA2	-1.30958	-1.33427	-0.451405	1	1	0	protein_coding	0	1	0
ENSG00000107821	KAZALD1	-0.538994	-0.602583	0	1	1	0	protein_coding	0	0	0
ENSG00000108107	RPL28	-0.93647	-1.00642	-0.450782	1	1	0	protein_coding	0	0	0
ENSG00000108349	CASC3	-0.221958	-0.836129	-1.02763	0	1	1	protein_coding	1	1	0
ENSG00000108468	CBX1	-0.540772	-0.491526	-0.769121	1	0	1	protein_coding	0	0	0
ENSG00000108733	PEX12	-0.610122	-1.22316	0	1	1	0	protein_coding	0	0	0
ENSG00000108786	HSD17B1	-0.680411	-0.519277	0	1	1	0	protein_coding	0	0	0
ENSG00000108821	COL1A1	-1.29264	0	-0.742035	1	0	1	protein_coding	0	0	0
ENSG00000108854	SMURF2	-0.579911	0	-0.5241	1	0	1	protein_coding	1	1	1
ENSG00000109062	SLC9A3R1	-0.753224	-0.570475	0	1	1	0	protein_coding	0	0	0
ENSG00000109689	STIM2	-1.13086	-0.503266	-0.335402	1	1	0	protein_coding	0	1	0
ENSG00000109738	GLRB	-0.552532	-0.566556	0	1	1	0	protein_coding	0	0	0
ENSG00000110090	CPT1A	0.278029	-0.719795	-0.664599	0	1	1	protein_coding	1	0	0
ENSG00000110422	HIPK3	-0.632728	-0.580216	0	1	1	0	protein_coding	1	1	0
ENSG00000110880	CORO1C	-0.50605	-0.57248	-0.37739	1	1	0	protein_coding	0	1	0
ENSG00000111077	TNS2	-1.36623	0	-1.46305	1	0	1	protein_coding	0	0	0
ENSG00000112144	ICK	-0.602506	-0.891172	0	1	1	0	protein_coding	0	0	1
ENSG00000112208	BAG2	-0.512172	-0.903019	-0.358365	1	1	0	protein_coding	0	1	1
ENSG00000112242	E2F3	-0.592666	-0.625177	-0.184397	1	1	0	protein_coding	1	1	0
ENSG00000112319	EYA4	-0.616109	-0.353684	-0.554985	1	0	1	protein_coding	1	1	0
ENSG00000112561	TFEB	0	-1.5927	-0.705371	0	1	1	protein_coding	1	1	0
ENSG00000112855	HARS2	-0.337228	-0.503613	-0.546009	0	1	1	protein_coding	0	0	0
ENSG00000113658	SMAD5	-0.667258	-1.01711	-0.35111	1	1	0	protein_coding	1	1	0
ENSG00000113758	DBN1	-0.536767	0	-0.804297	1	0	1	protein_coding	0	0	1
ENSG00000114115	RBP1	-0.798032	-1.439	-0.426516	1	1	0	protein_coding	0	0	0
ENSG00000114268	PFKFB4	-0.703429	-0.372918	-0.973186	1	0	1	protein_coding	0	0	0
ENSG00000114850	SSR3	-0.293987	-0.737059	-0.597304	0	1	1	protein_coding	0	0	1
ENSG00000115461	IGFBP5	-0.533765	-1.30846	-0.464334	1	1	0	protein_coding	0	0	1
ENSG00000115687	PASK	-0.73199	-0.768563	-0.447769	1	1	0	protein_coding	0	0	0
ENSG00000115738	ID2	-0.542583	-0.676911	-0.207706	1	1	0	protein_coding	0	0	0
ENSG00000116205	TCEANC2	-0.600777	-0.854776	-0.492964	1	1	0	protein_coding	0	0	0
ENSG00000116874	WARS2	0	-1.23349	-0.771896	0	1	1	protein_coding	0	0	0
ENSG00000117133	RPF1	0	-0.561428	-0.520318	0	1	1	protein_coding	0	0	0
ENSG00000117318	ID3	-0.962307	-3.68991	-0.264626	1	1	0	protein_coding	0	1	0
ENSG00000117505	DR1	-0.920392	-0.937775	-0.256448	1	1	0	protein_coding	0	0	1
ENSG00000118513	MYB	-1.24327	-1.11996	0	1	1	0	protein_coding	1	0	0
ENSG00000118816	CCNI	-0.709709	-0.594878	-0.415967	1	1	0	protein_coding	0	0	1
ENSG00000119630	PGF	-1.70022	-1.65205	0	1	1	0	protein_coding	0	0	0
ENSG00000119638	NEK9	-0.215245	-0.52853	-0.557626	0	1	1	protein_coding	1	0	0
ENSG00000119661	DNAL1	-0.414672	-0.847627	-0.571382	0	1	1	protein_coding	0	0	1
ENSG00000119688	ABCD4	-0.628644	-0.199393	-0.530563	1	0	1	protein_coding	0	0	0
ENSG00000119927	GPAM	-0.487279	-1.30914	-0.859208	0	1	1	protein_coding	1	1	1
ENSG00000120656	TAF12	-0.811268	-1.33425	0	1	1	0	protein_coding	0	0	1
ENSG00000120693	SMAD9	-0.759426	-0.571108	0	1	1	0	protein_coding	0	1	0
ENSG00000120699	EXOSC8	-0.314327	-0.64734	-0.65095	0	1	1	protein_coding	0	0	1
ENSG00000120738	EGR1	-1.45604	-2.91104	0.401194	1	1	0	protein_coding	1	0	0
ENSG00000120802	TMPO	-0.81859	-0.612513	-0.4912	1	1	0	protein_coding	0	0	1
ENSG00000120913	PDLIM2	0	-0.835916	-0.608075	0	1	1	protein_coding	0	1	0
ENSG00000121542	SEC22A	-0.601311	-0.464701	-0.530788	1	0	1	protein_coding	0	1	0
ENSG00000121578	B4GALT4	-0.497865	-0.502311	-0.611714	0	1	1	protein_coding	0	0	0
ENSG00000123219	CENPK	-0.8042	-0.500241	0	1	1	0	protein_coding	0	0	0
ENSG00000123485	HJURP	-0.5048	-0.698237	-0.262207	1	1	0	protein_coding	0	0	0
ENSG00000125089	SH3TC1	-2.37359	0	-0.608923	1	0	1	protein_coding	0	0	0
ENSG00000125772	GPCPD1	-0.684895	0	-0.518831	1	0	1	protein_coding	0	0	1
ENSG00000125945	ZNF436	-0.757333	-2.56467	0	1	1	0	protein_coding	0	0	0
ENSG00000125967	NECAB3	-0.604367	-0.971996	0	1	1	0	protein_coding	0	0	1
ENSG00000126215	XRCC3	-0.670482	-0.599316	-0.240369	1	1	0	protein_coding	0	0	0
ENSG00000126790	L3HYPDH	-0.784286	-1.13648	0	1	1	0	protein_coding	0	0	0
ENSG00000126878	AIF1L	-0.701306	-1.97547	0	1	1	0	protein_coding	1	0	0
ENSG00000127334	DYRK2	-0.649941	-0.651909	-0.19832	1	1	0	protein_coding	1	0	0
ENSG00000127337	YEATS4	0	-0.727254	-0.625889	0	1	1	protein_coding	0	0	1
ENSG00000128050	PAICS	-0.2098	-1.05486	-0.509303	0	1	1	protein_coding	0	0	0
ENSG00000128268	MGAT3	0	-2.06867	-0.701049	0	1	1	protein_coding	0	0	0
ENSG00000128591	FLNC	0	-1.3062	-0.663428	0	1	1	protein_coding	0	0	0
ENSG00000129474	AJUBA	-1.21555	-0.652617	0	1	1	0	protein_coding	0	0	1
ENSG00000129493	HEATR5A	-0.226825	-0.799504	-0.589875	0	1	1	protein_coding	0	0	0
ENSG00000130005	GAMT	-0.474217	-0.719697	-0.646803	0	1	1	protein_coding	0	0	0
ENSG00000130066	SAT1	-0.692891	-1.23362	0	1	1	0	protein_coding	0	0	0
ENSG00000130592	LSP1	-1.12695	-3.05132	0	1	1	0	protein_coding	0	0	0
ENSG00000130741	EIF2S3	-0.700832	-0.629819	-0.496917	1	1	0	protein_coding	0	0	1
ENSG00000130818	ZNF426	0	-0.820332	-0.542143	0	1	1	protein_coding	0	0	0
ENSG00000130844	ZNF331	-1.81632	-0.735858	0	1	1	0	protein_coding	0	0	0
ENSG00000131323	TRAF3	0.310354	-1.1038	-0.900687	0	1	1	protein_coding	1	1	1
ENSG00000131470	PSMC3IP	-1.19278	-0.911255	-0.336501	1	1	0	protein_coding	0	0	1
ENSG00000131747	TOP2A	-0.548289	-0.544423	-0.455047	1	1	0	protein_coding	0	0	0
ENSG00000132003	ZSWIM4	-1.09684	-0.944695	0	1	1	0	protein_coding	0	0	1
ENSG00000132170	PPARG	0	-0.759725	-0.767942	0	1	1	protein_coding	0	1	0
ENSG00000132207	SLX1A	-0.509265	-0.506758	0	1	1	0	protein_coding	0	0	0
ENSG00000132680	KHDC4	-0.519594	-0.627394	-0.165273	1	1	0	protein_coding	0	0	0
ENSG00000133065	SLC41A1	-0.528987	-0.9872	-0.414294	1	1	0	protein_coding	0	0	1
ENSG00000133119	RFC3	0	-0.618449	-0.504661	0	1	1	protein_coding	0	0	1
ENSG00000133195	SLC39A11	0	-1.03081	-0.670312	0	1	1	protein_coding	0	1	0
ENSG00000134419	RPS15A	-0.500091	-0.698373	-0.167976	1	1	0	protein_coding	0	0	0
ENSG00000134686	PHC2	-0.369489	-0.622563	-0.537593	0	1	1	protein_coding	0	0	0
ENSG00000134986	NREP	-1.30101	0.280481	-0.622536	1	0	1	protein_coding	0	1	1
ENSG00000135341	MAP3K7	-0.612363	-0.585017	-0.382991	1	1	0	protein_coding	0	0	0
ENSG00000135437	RDH5	-2.08543	-1.60386	0	1	1	0	protein_coding	0	0	0
ENSG00000135486	HNRNPA1	-0.667313	-0.773345	-0.388621	1	1	0	protein_coding	0	0	0
ENSG00000135824	RGS8	0	-2.17878	-2.20521	0	1	1	protein_coding	0	0	0
ENSG00000136122	BORA	0	-0.619499	-0.661375	0	1	1	protein_coding	0	0	0
ENSG00000136261	BZW2	-0.407082	-1.01502	-0.803448	0	1	1	protein_coding	0	0	0
ENSG00000136425	CIB2	-0.630916	-0.486473	-0.783631	1	0	1	protein_coding	0	0	0
ENSG00000136451	VEZF1	-0.670902	-0.735618	-0.473295	1	1	0	protein_coding	0	0	0
ENSG00000136485	DCAF7	-0.3322	-0.622127	-0.611885	0	1	1	protein_coding	1	1	0
ENSG00000136492	BRIP1	-1.45911	-0.493857	-0.575774	1	0	1	protein_coding	0	0	0
ENSG00000136603	SKIL	-0.567594	-0.519167	0	1	1	0	protein_coding	0	0	1
ENSG00000136859	ANGPTL2	0.304591	-1.20929	-0.842069	0	1	1	protein_coding	0	0	1
ENSG00000136943	CTSV	-1.11204	-0.412567	-1.0369	1	0	1	protein_coding	0	0	0
ENSG00000136997	MYC	0.211426	-0.99279	-0.760195	0	1	1	protein_coding	0	0	0
ENSG00000137070	IL11RA	0	-0.973473	-0.844826	0	1	1	protein_coding	0	0	0
ENSG00000137331	IER3	-0.792338	-0.564586	0	1	1	0	protein_coding	0	0	0
ENSG00000137710	RDX	-0.347031	-1.31697	-0.525388	0	1	1	protein_coding	0	0	0
ENSG00000137726	FXYD6	-0.891713	-0.461267	-1.431	1	0	1	protein_coding	0	0	1
ENSG00000137834	SMAD6	-1.02968	-1.31292	0	1	1	0	protein_coding	0	0	0
ENSG00000138036	DYNC2LI1	-0.505753	-0.488589	-0.714351	1	0	1	protein_coding	0	0	0
ENSG00000138080	EMILIN1	-0.583286	-1.80554	-0.406287	1	1	0	protein_coding	0	0	0
ENSG00000138166	DUSP5	-1.66958	-1.27394	0	1	1	0	protein_coding	0	1	1
ENSG00000138346	DNA2	-0.781318	-0.4999	-0.617235	1	0	1	protein_coding	0	0	0
ENSG00000138606	SHF	-1.02331	0	-0.719457	1	0	1	protein_coding	0	0	0
ENSG00000138613	APH1B	0	-0.693658	-1.08417	0	1	1	protein_coding	1	0	0
ENSG00000138658	ZGRF1	-0.801161	-0.775786	-0.417562	1	1	0	protein_coding	0	0	0
ENSG00000138767	CNOT6L	-1.0027	-0.757649	-0.464777	1	1	0	protein_coding	0	0	0
ENSG00000139438	FAM222A	0	-0.561618	-1.02299	0	1	1	protein_coding	0	1	0
ENSG00000139636	LMBR1L	-0.845456	0	-0.841439	1	0	1	protein_coding	0	1	1
ENSG00000139800	ZIC5	-0.608078	-0.742382	0	1	1	0	protein_coding	0	0	0
ENSG00000139910	NOVA1	-0.608028	-0.365676	-0.87058	1	0	1	protein_coding	0	1	0
ENSG00000139946	PELI2	-0.890327	0	-0.568657	1	0	1	protein_coding	0	1	0
ENSG00000140043	PTGR2	-0.661172	-0.864055	-0.317578	1	1	0	protein_coding	0	0	0
ENSG00000140044	JDP2	-0.768647	-0.944796	0	1	1	0	protein_coding	0	0	1
ENSG00000140525	FANCI	-0.792977	-0.547097	-0.355723	1	1	0	protein_coding	0	0	0
ENSG00000140534	TICRR	-1.16358	-0.340205	-0.501347	1	0	1	protein_coding	0	0	0
ENSG00000140931	CMTM3	-0.68879	-0.388865	-1.28568	1	0	1	protein_coding	0	0	0
ENSG00000140937	CDH11	0	-1.98301	-1.9031	0	1	1	protein_coding	0	1	1
ENSG00000140983	RHOT2	-0.343367	-0.634344	-0.545184	0	1	1	protein_coding	0	0	0
ENSG00000141314	RHBDL3	-1.30807	-1.17538	0	1	1	0	protein_coding	0	0	0
ENSG00000141401	IMPA2	-1.36176	-1.15811	0	1	1	0	protein_coding	0	0	1
ENSG00000142347	MYO1F	-1.61327	-0.923334	0	1	1	0	protein_coding	0	0	0
ENSG00000142494	SLC47A1	-1.00348	-0.99952	0	1	1	0	protein_coding	0	0	1
ENSG00000142541	RPL13A	-0.694384	-0.857368	-0.305502	1	1	0	protein_coding	0	0	0
ENSG00000142619	PADI3	-2.43453	-0.739726	0	1	1	0	protein_coding	0	0	0
ENSG00000142945	KIF2C	-0.515769	-0.504509	-0.301406	1	1	0	protein_coding	0	0	0
ENSG00000142961	MOB3C	-0.901375	-0.692841	0	1	1	0	protein_coding	0	0	0
ENSG00000143494	VASH2	-1.59662	-0.881254	0	1	1	0	protein_coding	0	1	1
ENSG00000143970	ASXL2	-0.697013	-0.836967	-0.379695	1	1	0	protein_coding	1	0	1
ENSG00000144228	SPOPL	-1.31275	-1.30614	0	1	1	0	protein_coding	1	1	0
ENSG00000144426	NBEAL1	-0.579518	-0.906947	0	1	1	0	protein_coding	0	1	1
ENSG00000144596	GRIP2	-0.863033	-0.714429	0	1	1	0	protein_coding	0	0	0
ENSG00000144677	CTDSPL	-2.52622	-1.51716	0	1	1	0	protein_coding	1	1	1
ENSG00000144747	TMF1	-0.61036	-1.17779	0	1	1	0	protein_coding	0	0	1
ENSG00000144802	NFKBIZ	-1.21274	0	-0.741546	1	0	1	protein_coding	1	0	0
ENSG00000145029	NICN1	-0.703436	-1.08729	0	1	1	0	protein_coding	0	0	0
ENSG00000145040	UCN2	-1.88713	-0.828033	0	1	1	0	protein_coding	0	0	0
ENSG00000145284	SCD5	0	-0.634403	-0.960434	0	1	1	protein_coding	0	0	1
ENSG00000145391	SETD7	-0.501056	-0.965195	-0.39435	1	1	0	protein_coding	0	1	1
ENSG00000145592	RPL37	-0.606862	-0.873304	-0.35411	1	1	0	protein_coding	0	0	0
ENSG00000145604	SKP2	0	-0.656197	-1.09558	0	1	1	protein_coding	0	0	0
ENSG00000146425	DYNLT1	-0.176966	-0.644569	-0.928906	0	1	1	protein_coding	0	0	0
ENSG00000147164	SNX12	0	-0.689109	-0.532086	0	1	1	protein_coding	0	1	0
ENSG00000147649	MTDH	0.166266	-0.786471	-0.701715	0	1	1	protein_coding	1	1	1
ENSG00000147852	VLDLR	-0.792974	0	-1.10774	1	0	1	protein_coding	1	0	0
ENSG00000148334	PTGES2	-0.371802	-1.02868	-0.518177	0	1	1	protein_coding	0	0	1
ENSG00000149260	CAPN5	0	-0.681718	-1.02968	0	1	1	protein_coding	0	0	0
ENSG00000149346	SLX4IP	-0.979082	-0.423738	-0.628003	1	0	1	protein_coding	0	0	0
ENSG00000149823	VPS51	-0.519233	-0.771472	-0.167997	1	1	0	protein_coding	0	0	0
ENSG00000151233	GXYLT1	-0.459267	-0.946788	-0.964565	0	1	1	protein_coding	1	1	1
ENSG00000151468	CCDC3	0	-1.54991	-1.41292	0	1	1	protein_coding	0	0	0
ENSG00000151692	RNF144A	-1.00849	-0.46946	-1.39202	1	0	1	protein_coding	1	1	0
ENSG00000152409	JMY	-0.565388	-0.508308	0	1	1	0	protein_coding	0	0	1
ENSG00000152455	SUV39H2	-0.695397	-0.719719	-0.460917	1	1	0	protein_coding	1	0	0
ENSG00000152518	ZFP36L2	-0.38878	-1.60783	-0.803872	0	1	1	protein_coding	1	1	1
ENSG00000152700	SAR1B	-0.953342	-0.995305	0	1	1	0	protein_coding	1	0	1
ENSG00000153904	DDAH1	0.365063	-0.591742	-0.886027	0	1	1	protein_coding	0	1	0
ENSG00000154102	C16orf74	-0.666631	-1.35715	0	1	1	0	protein_coding	0	0	0
ENSG00000154124	OTULIN	-0.804044	-0.929081	-0.310627	1	1	0	protein_coding	0	0	0
ENSG00000154429	CCSAP	-0.967837	-0.553867	-0.452923	1	1	0	protein_coding	0	0	0
ENSG00000154553	PDLIM3	-0.884417	0	-0.509534	1	0	1	protein_coding	0	0	1
ENSG00000154639	CXADR	-0.878756	0.253929	-0.834465	1	0	1	protein_coding	1	1	1
ENSG00000154654	NCAM2	0	-1.74293	-0.824514	0	1	1	protein_coding	1	0	0
ENSG00000155090	KLF10	-0.574654	-0.781597	0	1	1	0	protein_coding	0	0	0
ENSG00000155463	OXA1L	-0.602417	-1.06944	-0.396952	1	1	0	protein_coding	0	0	0
ENSG00000155744	FAM126B	-0.822703	-0.412467	-0.546704	1	0	1	protein_coding	0	1	1
ENSG00000155850	SLC26A2	-0.993046	-0.243643	-0.599068	1	0	1	protein_coding	1	0	1
ENSG00000156381	ANKRD9	-0.549012	-0.6336	0	1	1	0	protein_coding	0	0	0
ENSG00000156521	TYSND1	-0.629691	-0.917901	0.259789	1	1	0	protein_coding	0	0	0
ENSG00000157107	FCHO2	-0.549101	0	-0.553454	1	0	1	protein_coding	1	0	0
ENSG00000157657	ZNF618	-0.831578	0	-0.801585	1	0	1	protein_coding	1	1	0
ENSG00000157978	LDLRAP1	-0.561512	0	-0.923383	1	0	1	protein_coding	1	0	0
ENSG00000158246	TENT5B	-1.29422	-1.94913	0	1	1	0	protein_coding	0	0	0
ENSG00000158863	FAM160B2	-0.439835	-0.562375	-0.583826	0	1	1	protein_coding	0	0	0
ENSG00000159023	EPB41	-1.14869	-0.972089	-0.295997	1	1	0	protein_coding	0	1	0
ENSG00000159147	DONSON	-0.580755	-0.851895	0	1	1	0	protein_coding	0	0	0
ENSG00000159388	BTG2	-0.513375	-0.825554	0	1	1	0	protein_coding	1	1	0
ENSG00000159459	UBR1	0	-0.553931	-0.630561	0	1	1	protein_coding	0	1	0
ENSG00000159792	PSKH1	0	-0.598961	-1.04966	0	1	1	protein_coding	0	0	0
ENSG00000160097	FNDC5	-2.5423	0	-1.38681	1	0	1	protein_coding	0	0	0
ENSG00000160325	CACFD1	-1.04891	0	-0.953192	1	0	1	protein_coding	1	0	0
ENSG00000160685	ZBTB7B	-0.619866	-1.13978	0.497487	1	1	0	protein_coding	1	0	0
ENSG00000160688	FLAD1	-0.470925	-1.13713	-0.902056	0	1	1	protein_coding	0	0	0
ENSG00000160781	PAQR6	-0.915451	-0.547328	0	1	1	0	protein_coding	0	0	0
ENSG00000160957	RECQL4	-0.859125	-0.710162	-0.365429	1	1	0	protein_coding	0	0	0
ENSG00000161021	MAML1	-0.53755	-0.654568	-0.380395	1	1	0	protein_coding	1	0	1
ENSG00000161888	SPC24	-0.686058	-0.777583	-0.27436	1	1	0	protein_coding	0	0	0
ENSG00000161996	WDR90	-0.604892	-0.518587	-0.292216	1	1	0	protein_coding	0	0	0
ENSG00000162032	SPSB3	-0.658094	-0.472488	-0.560017	1	0	1	protein_coding	0	0	0
ENSG00000162062	TEDC2	-0.581563	-0.561641	0	1	1	0	protein_coding	0	0	0
ENSG00000162430	SELENON	0	-0.506748	-0.561493	0	1	1	protein_coding	0	0	0
ENSG00000162522	KIAA1522	-0.541032	0	-0.776652	1	0	1	protein_coding	0	0	0
ENSG00000163064	EN1	-0.617827	-1.34679	0	1	1	0	protein_coding	0	1	0
ENSG00000163597	SNHG16	-0.74728	-1.06607	-0.258571	1	1	0	processed_transcript	0	0	0
ENSG00000163683	SMIM14	-0.847432	-1.28423	0	1	1	0	protein_coding	0	1	0
ENSG00000163848	ZNF148	-0.776782	-0.909328	-0.417705	1	1	0	protein_coding	1	0	1
ENSG00000164292	RHOBTB3	-0.393974	-0.70859	-0.686932	0	1	1	protein_coding	0	0	0
ENSG00000164318	EGFLAM	0	-0.54391	-0.552499	0	1	1	protein_coding	0	0	0
ENSG00000164683	HEY1	-0.802468	-0.969468	0.408068	1	1	0	protein_coding	0	0	0
ENSG00000164850	GPER1	-1.62835	0	-1.96423	1	0	1	protein_coding	0	0	0
ENSG00000164904	ALDH7A1	-0.342276	-0.707824	-0.598864	0	1	1	protein_coding	0	0	0
ENSG00000164929	BAALC	0	-1.58444	-0.558728	0	1	1	protein_coding	0	0	0
ENSG00000165185	KIAA1958	-0.707862	-1.78221	-0.269419	1	1	0	protein_coding	1	0	1
ENSG00000165195	PIGA	0	-0.587282	-0.750775	0	1	1	protein_coding	0	0	0
ENSG00000165406	43898	-0.806069	-0.403092	-0.86683	1	0	1	protein_coding	1	1	1
ENSG00000165449	SLC16A9	0	-0.506917	-1.03874	0	1	1	protein_coding	0	0	1
ENSG00000165480	SKA3	-0.657295	-0.569547	-0.326844	1	1	0	protein_coding	0	0	0
ENSG00000165490	DDIAS	-0.640199	-0.842045	-0.263741	1	1	0	protein_coding	0	0	0
ENSG00000165716	FAM69B	0	-0.771983	-0.532442	0	1	1	protein_coding	0	0	0
ENSG00000165879	FRAT1	-1.81466	-1.33823	0	1	1	0	protein_coding	0	0	0
ENSG00000165891	E2F7	-0.846287	-0.439938	-1.69346	1	0	1	protein_coding	0	1	1
ENSG00000165915	SLC39A13	-0.721072	-0.398959	-1.09569	1	0	1	protein_coding	0	1	0
ENSG00000166452	AKIP1	-0.6796	-0.509844	0	1	1	0	protein_coding	0	0	0
ENSG00000166575	TMEM135	-0.733789	-0.485839	-0.535534	1	0	1	protein_coding	0	0	0
ENSG00000166803	PCLAF	-0.762643	-0.698879	-0.251203	1	1	0	protein_coding	0	0	0
ENSG00000166822	TMEM170A	-0.508745	-0.60327	0	1	1	0	protein_coding	0	1	0
ENSG00000166886	NAB2	-1.11948	-1.50448	0.25857	1	1	0	protein_coding	0	0	1
ENSG00000166965	RCCD1	-0.547162	-0.540524	0	1	1	0	protein_coding	0	0	0
ENSG00000166987	MBD6	-0.599989	0.258016	-0.615607	1	0	1	protein_coding	0	0	1
ENSG00000167513	CDT1	-0.818075	-1.14207	-0.232581	1	1	0	protein_coding	0	0	0
ENSG00000167536	DHRS13	-0.643132	-0.557821	0	1	1	0	protein_coding	0	0	0
ENSG00000167549	CORO6	0	-1.54029	-0.784673	0	1	1	protein_coding	0	0	0
ENSG00000167670	CHAF1A	-0.71095	-0.631595	-0.286219	1	1	0	protein_coding	0	0	0
ENSG00000167695	FAM57A	-0.445841	-0.570503	-0.603205	0	1	1	protein_coding	0	0	0
ENSG00000167703	SLC43A2	-1.13913	-0.714962	-0.484408	1	1	0	protein_coding	0	0	1
ENSG00000167964	RAB26	-1.12992	-1.41012	0	1	1	0	protein_coding	0	0	0
ENSG00000168209	DDIT4	-0.64964	-2.36781	0	1	1	0	protein_coding	0	0	0
ENSG00000168268	NT5DC2	-0.86766	-0.390654	-0.589685	1	0	1	protein_coding	0	0	1
ENSG00000168411	RFWD3	-0.507157	-0.668773	-0.477222	1	1	0	protein_coding	0	0	0
ENSG00000168496	FEN1	-0.554947	-0.578013	-0.381875	1	1	0	protein_coding	0	0	0
ENSG00000168615	ADAM9	0	-0.633325	-0.647804	0	1	1	protein_coding	0	0	1
ENSG00000168672	FAM84B	-0.6125	-1.49703	0	1	1	0	protein_coding	0	1	0
ENSG00000168807	SNTB2	-0.889346	-0.629535	0.244488	1	1	0	protein_coding	1	0	0
ENSG00000168916	ZNF608	-0.976959	-0.506595	-0.360333	1	1	0	protein_coding	1	1	0
ENSG00000168993	CPLX1	0	-1.59788	-1.06309	0	1	1	protein_coding	0	0	1
ENSG00000169100	SLC25A6	-0.722802	-0.790437	-0.194067	1	1	0	protein_coding	0	0	0
ENSG00000169783	LINGO1	-0.882484	-1.53478	0	1	1	0	protein_coding	0	0	0
ENSG00000169813	HNRNPF	-0.571279	-0.897769	-0.436248	1	1	0	protein_coding	0	1	0
ENSG00000170439	METTL7B	-2.15271	-1.57476	0	1	1	0	protein_coding	0	0	0
ENSG00000170464	DNAJC18	-0.450296	-0.945971	-0.566026	0	1	1	protein_coding	0	0	0
ENSG00000171119	NRTN	0	-3.57278	-1.85677	0	1	1	protein_coding	0	0	0
ENSG00000171425	ZNF581	-0.568616	-0.770504	-0.304712	1	1	0	protein_coding	0	0	0
ENSG00000171848	RRM2	-0.289385	-0.593891	-0.559085	0	1	1	protein_coding	0	0	0
ENSG00000171903	CYP4F11	-1.21405	-1.24011	0	1	1	0	protein_coding	0	0	0
ENSG00000172081	MOB3A	-0.935564	-0.798992	0	1	1	0	protein_coding	0	0	0
ENSG00000172172	MRPL13	-0.202704	-0.630475	-0.693878	0	1	1	protein_coding	0	0	0
ENSG00000172466	ZNF24	-0.252239	-1.10777	-0.514969	0	1	1	protein_coding	0	1	1
ENSG00000172638	EFEMP2	0	-1.0927	-0.747659	0	1	1	protein_coding	0	0	1
ENSG00000172795	DCP2	0	-1.20582	-0.703183	0	1	1	protein_coding	0	1	0
ENSG00000172819	RARG	0	-0.981393	-0.835141	0	1	1	protein_coding	1	0	0
ENSG00000173281	PPP1R3B	0	-0.543302	-0.603947	0	1	1	protein_coding	1	0	0
ENSG00000173511	VEGFB	0	-1.1968	-0.610375	0	1	1	protein_coding	0	0	0
ENSG00000173531	MST1	-0.53218	-0.564531	0	1	1	0	protein_coding	0	0	0
ENSG00000173918	C1QTNF1	-1.01994	-1.44609	0	1	1	0	protein_coding	0	0	0
ENSG00000174371	EXO1	-0.467274	-0.829253	-0.518828	0	1	1	protein_coding	0	0	1
ENSG00000174748	RPL15	-0.521515	-0.745728	-0.310909	1	1	0	protein_coding	0	0	1
ENSG00000175130	MARCKSL1	-0.542796	-0.274138	-0.681004	1	0	1	protein_coding	0	0	0
ENSG00000175305	CCNE2	-1.34031	-0.687472	-0.224918	1	1	0	protein_coding	0	0	0
ENSG00000175324	LSM1	-0.530924	-0.772653	-0.483236	1	1	0	protein_coding	0	0	0
ENSG00000175600	SUGCT	0	-0.787307	-0.733583	0	1	1	protein_coding	0	0	0
ENSG00000175785	PRIMA1	0	-1.78987	-1.33502	0	1	1	protein_coding	0	0	0
ENSG00000176046	NUPR1	-0.914521	-1.86723	0	1	1	0	protein_coding	0	0	0
ENSG00000176261	ZBTB8OS	0	-0.95556	-0.640478	0	1	1	protein_coding	0	0	0
ENSG00000176485	PLA2G16	-0.431194	-1.54238	-0.573226	0	1	1	protein_coding	0	0	0
ENSG00000177042	TMEM80	-0.85118	0	-0.62797	1	0	1	protein_coding	0	0	0
ENSG00000177374	HIC1	-0.875412	-2.3786	0	1	1	0	protein_coding	1	1	1
ENSG00000177410	ZFAS1	-0.58182	-1.0216	-0.297663	1	1	0	antisense	0	0	0
ENSG00000177602	HASPIN	-0.560385	-0.774514	0	1	1	0	protein_coding	0	0	0
ENSG00000177822	AC098864.1	0	-0.559756	-0.545762	0	1	1	antisense	0	0	0
ENSG00000178691	SUZ12	-0.506523	-0.651093	-0.478563	1	1	0	protein_coding	0	1	1
ENSG00000179119	SPTY2D1	0	-0.994648	-0.900052	0	1	1	protein_coding	1	1	1
ENSG00000179348	GATA2	-0.885495	-0.786466	-0.232991	1	1	0	protein_coding	0	1	0
ENSG00000179387	ELMOD2	-0.743198	-0.477941	-1.1286	1	0	1	protein_coding	0	0	1
ENSG00000179409	GEMIN4	-0.821561	-1.04993	-0.487374	1	1	0	protein_coding	0	0	1
ENSG00000179604	CDC42EP4	-0.600667	-0.801861	-0.217388	1	1	0	protein_coding	0	0	0
ENSG00000179772	FOXS1	-1.7892	-1.13756	0	1	1	0	protein_coding	0	0	0
ENSG00000180370	PAK2	0	-0.75535	-0.666512	0	1	1	protein_coding	0	0	1
ENSG00000180773	SLC36A4	-0.419928	-0.764943	-0.67921	0	1	1	protein_coding	0	0	1
ENSG00000180921	FAM83H	-2.42612	-2.60751	0	1	1	0	protein_coding	0	0	0
ENSG00000181826	RELL1	0	-1.29672	-1.36572	0	1	1	protein_coding	0	0	1
ENSG00000182022	CHST15	-0.453936	-1.79224	-0.71755	0	1	1	protein_coding	0	0	0
ENSG00000182103	FAM181B	0	-1.23393	-0.624217	0	1	1	protein_coding	0	0	0
ENSG00000182173	TSEN54	-0.551771	-0.663905	-0.252	1	1	0	protein_coding	0	0	0
ENSG00000182185	RAD51B	0	-0.520403	-0.72674	0	1	1	protein_coding	0	0	0
ENSG00000182534	MXRA7	-0.922888	-0.374836	-0.626298	1	0	1	protein_coding	0	0	1
ENSG00000182934	SRPRA	-0.484739	-0.636859	-0.597737	0	1	1	protein_coding	0	0	0
ENSG00000183092	BEGAIN	0	-0.863964	-0.502661	0	1	1	protein_coding	0	0	0
ENSG00000183160	TMEM119	0	-1.90811	-1.17461	0	1	1	protein_coding	0	0	0
ENSG00000183283	DAZAP2	-0.627521	-0.491055	-0.899637	1	0	1	protein_coding	0	1	0
ENSG00000184182	UBE2F	0	-0.689302	-0.589781	0	1	1	protein_coding	0	1	1
ENSG00000184432	COPB2	0	-0.610055	-0.509515	0	1	1	protein_coding	0	0	0
ENSG00000184557	SOCS3	0.451406	-1.97118	-1.59253	0	1	1	protein_coding	0	0	0
ENSG00000184792	OSBP2	-0.504393	0.483695	-0.669003	1	0	1	protein_coding	1	0	1
ENSG00000184992	BRI3BP	-0.697041	-0.771649	-0.299514	1	1	0	protein_coding	0	0	0
ENSG00000185236	RAB11B	-0.824274	-0.420378	-0.519439	1	0	1	protein_coding	0	0	1
ENSG00000185591	SP1	-1.28713	-1.23819	-0.322389	1	1	0	protein_coding	1	1	1
ENSG00000185650	ZFP36L1	-0.778624	-0.742362	0	1	1	0	protein_coding	1	1	0
ENSG00000185684	EP400P1	-0.527956	-0.527163	-0.370129	1	1	0	transcribed_unprocessed_pseudogene	0	0	0
ENSG00000185818	NAT8L	-0.669532	-1.55669	-0.323853	1	1	0	protein_coding	1	0	1
ENSG00000186063	AIDA	-0.740238	-0.644532	0	1	1	0	protein_coding	1	0	0
ENSG00000186298	PPP1CC	0	-1.23104	-0.6879	0	1	1	protein_coding	0	1	0
ENSG00000186638	KIF24	-0.866452	0	-0.62634	1	0	1	protein_coding	0	0	0
ENSG00000186918	ZNF395	-0.689315	0	-0.826821	1	0	1	protein_coding	0	1	0
ENSG00000186951	PPARA	0	-0.695762	-1.14586	0	1	1	protein_coding	0	0	1
ENSG00000187049	TMEM216	0	-0.668927	-0.52739	0	1	1	protein_coding	0	0	0
ENSG00000187257	RSBN1L	-0.667397	-0.595875	-0.303851	1	1	0	protein_coding	0	1	0
ENSG00000187735	TCEA1	-0.300067	-0.710582	-0.504168	0	1	1	protein_coding	0	0	0
ENSG00000188707	ZBED6CL	0	-4.15811	-0.736455	0	1	1	protein_coding	0	0	0
ENSG00000188848	BEND4	0	-1.77672	-0.836826	0	1	1	protein_coding	0	1	0
ENSG00000189057	FAM111B	-0.793984	-0.445146	-0.523164	1	0	1	protein_coding	0	0	0
ENSG00000196517	SLC6A9	-1.34003	-1.94806	0	1	1	0	protein_coding	0	0	1
ENSG00000196576	PLXNB2	-0.692967	-0.458926	-0.561621	1	0	1	protein_coding	1	0	1
ENSG00000196584	XRCC2	-0.863048	-0.421814	-0.584166	1	0	1	protein_coding	0	0	0
ENSG00000196655	TRAPPC4	0	-0.878114	-0.571321	0	1	1	protein_coding	0	0	0
ENSG00000197006	METTL9	-1.07358	-0.718741	-0.268818	1	1	0	protein_coding	0	0	1
ENSG00000197119	SLC25A29	-0.783736	-0.428561	-0.631222	1	0	1	protein_coding	0	0	0
ENSG00000197275	RAD54B	0	-0.843985	-0.729551	0	1	1	protein_coding	0	0	0
ENSG00000197332	AC008543.1	-1.87959	-0.783733	0	1	1	0	lincRNA	0	0	0
ENSG00000197417	SHPK	0	-0.888077	-0.547664	0	1	1	protein_coding	0	0	0
ENSG00000197429	IPP	-0.38137	-0.555153	-0.532657	0	1	1	protein_coding	0	0	0
ENSG00000197879	MYO1C	0	-0.620667	-0.520352	0	1	1	protein_coding	1	0	1
ENSG00000197958	RPL12	-0.60787	-0.738985	-0.226508	1	1	0	protein_coding	0	0	0
ENSG00000198015	MRPL42	-0.306713	-0.737128	-0.568219	0	1	1	protein_coding	0	0	0
ENSG00000198189	HSD17B11	0	-0.740708	-0.515182	0	1	1	protein_coding	0	0	0
ENSG00000198604	BAZ1A	-0.213092	-1.07406	-0.604177	0	1	1	protein_coding	0	0	1
ENSG00000198740	ZNF652	-1.08348	-0.604961	-0.281549	1	1	0	protein_coding	1	1	0
ENSG00000198753	PLXNB3	0	-0.690729	-0.767639	0	1	1	protein_coding	0	0	0
ENSG00000203546	AL139353.1	0	-0.611288	-0.534284	0	1	1	protein_coding	0	0	0
ENSG00000203761	MSTO2P	-0.587682	-0.580403	-0.484138	1	1	0	unprocessed_pseudogene	0	0	0
ENSG00000203880	PCMTD2	-0.64432	0	-0.626461	1	0	1	protein_coding	0	0	0
ENSG00000204387	C6orf48	-0.51467	-0.7675	0	1	1	0	protein_coding	0	0	0
ENSG00000204439	C6orf47	-0.553204	-0.563334	-0.42797	1	1	0	protein_coding	0	0	1
ENSG00000205464	ATP6AP1L	-0.785605	-0.624063	0	1	1	0	protein_coding	0	0	0
ENSG00000205476	CCDC85C	-0.585437	-0.430642	-0.97561	1	0	1	protein_coding	0	1	1
ENSG00000205544	TMEM256	0	-0.908365	-0.601608	0	1	1	protein_coding	0	0	0
ENSG00000205581	HMGN1	-0.626439	-0.308297	-0.502037	1	0	1	protein_coding	0	0	0
ENSG00000205683	DPF3	0	-0.905559	-0.653484	0	1	1	protein_coding	0	0	1
ENSG00000210082	MT-RNR2	-0.800632	0.300223	-0.700911	1	0	1	Mt_rRNA	0	0	0
ENSG00000211460	TSN	-0.615281	0	-0.642827	1	0	1	protein_coding	1	0	1
ENSG00000213694	S1PR3	0	-1.07884	-0.642704	0	1	1	protein_coding	0	0	0
ENSG00000213809	KLRK1	-1.59957	-0.901564	0	1	1	0	protein_coding	0	0	0
ENSG00000214135	AC132008.2	-0.474925	-0.629515	-0.51996	0	1	1	transcribed_unprocessed_pseudogene	0	0	0
ENSG00000214826	DDX12P	-0.643639	-0.531528	0	1	1	0	unprocessed_pseudogene	0	0	0
ENSG00000221829	FANCG	-0.820738	-0.692261	-0.330387	1	1	0	protein_coding	0	0	0
ENSG00000224281	SLC25A5-AS1	0	-0.902692	-0.811211	0	1	1	processed_transcript	0	0	0
ENSG00000224389	C4B	-1.23353	-1.35109	0	1	1	0	protein_coding	0	0	0
ENSG00000224578	HNRNPA1P48	-0.82248	-1.26288	0	1	1	0	protein_coding	0	0	0
ENSG00000225968	ELFN1	0	-1.1181	-0.998081	0	1	1	protein_coding	0	0	0
ENSG00000226174	TEX22	-0.814027	0	-0.820023	1	0	1	protein_coding	0	0	0
ENSG00000227036	LINC00511	0.335283	-0.712904	-0.544275	0	1	1	processed_transcript	0	0	0
ENSG00000229186	ADAM1A	-7.56645	0	-1.97936	1	0	1	unitary_pseudogene	0	0	0
ENSG00000229544	NKX1-2	-1.58053	-1.78933	0	1	1	0	protein_coding	0	0	0
ENSG00000230551	AC021078.1	-0.814258	-0.82476	0	1	1	0	processed_transcript	0	0	0
ENSG00000232149	FERP1	-1.5304	0	-2.83816	1	0	1	processed_pseudogene	0	0	0
ENSG00000232388	SMIM26	-0.661572	-0.976072	-0.47453	1	1	0	protein_coding	0	0	0
ENSG00000232630	PRPS1P2	-1.43838	0	-1.27602	1	0	1	processed_pseudogene	0	0	0
ENSG00000235609	AF127577.4	0	-1.79851	-0.805101	0	1	1	lincRNA	0	0	0
ENSG00000236901	MIR600HG	-0.616619	-0.715811	-0.383837	1	1	0	sense_intronic	0	0	0
ENSG00000237441	RGL2	-0.585427	-0.76004	-0.462445	1	1	0	protein_coding	0	1	0
ENSG00000239922	AC092958.1	-0.721929	-0.511671	0	1	1	0	lincRNA	0	0	0
ENSG00000245532	NEAT1	-0.596604	-1.05252	0.120823	1	1	0	lincRNA	1	0	0
ENSG00000247556	OIP5-AS1	-1.3892	-1.44782	-0.476389	1	1	0	processed_transcript	0	0	0
ENSG00000249087	ZNF436-AS1	-1.30428	-2.4909	0	1	1	0	antisense	0	0	0
ENSG00000249709	ZNF564	-0.684529	-0.576075	0	1	1	0	protein_coding	0	0	0
ENSG00000251002	AC244502.1	-2.26873	-1.8016	0	1	1	0	processed_transcript	0	0	0
ENSG00000251562	MALAT1	-0.743002	-1.61894	0.185561	1	1	0	lincRNA	0	0	0
ENSG00000253854	AC010834.3	-1.98904	-1.12898	0	1	1	0	antisense	0	0	0
ENSG00000255690	TRIL	-1.14986	-0.694984	0	1	1	0	protein_coding	0	0	0
ENSG00000255819	KLRC4-KLRK1	-0.703415	-0.840031	0	1	1	0	protein_coding	0	0	0
ENSG00000255857	PXN-AS1	-0.637628	-0.867154	0	1	1	0	antisense	0	0	0
ENSG00000256663	AC112777.1	-0.954043	-0.500782	0	1	1	0	processed_pseudogene	0	0	0
ENSG00000257093	KIAA1147	0	-0.575745	-0.592591	0	1	1	protein_coding	1	1	1
ENSG00000257267	ZNF271P	0	-0.591471	-0.670561	0	1	1	transcribed_unitary_pseudogene	0	0	0
ENSG00000257354	AC048341.1	-1.44145	-0.773246	0	1	1	0	lincRNA	0	0	0
ENSG00000261135	AL137802.2	-1.06512	-0.977519	0	1	1	0	lincRNA	0	0	0
ENSG00000261326	LINC01355	-0.927006	-1.23691	0	1	1	0	lincRNA	0	0	0
ENSG00000261716	HIST2H2BC	-0.693981	-0.789615	0	1	1	0	transcribed_unprocessed_pseudogene	0	0	0
ENSG00000262179	MYMX	-2.72831	-1.59532	0	1	1	0	protein_coding	0	0	0
ENSG00000262814	MRPL12	-0.30529	-1.37245	-0.70322	0	1	1	protein_coding	0	0	0
ENSG00000263020	AL662899.2	-1.57134	-1.39672	0	1	1	0	protein_coding	0	0	0
ENSG00000265194	AL359922.2	0	-1.03063	-0.878577	0	1	1	antisense	0	0	0
ENSG00000265818	EEF1E1-BLOC1S5	0	-2.65402	-2.57048	0	1	1	protein_coding	0	0	0
ENSG00000266074	BAHCC1	-0.727749	0	-0.529963	1	0	1	protein_coding	0	0	0
ENSG00000270885	RASL10B	-0.765898	-1.36682	0.268875	1	1	0	protein_coding	0	0	0
ENSG00000273373	AL355488.1	-0.887668	-1.09951	0	1	1	0	antisense	0	0	0
ENSG00000273599	AL731571.1	-0.938225	0	-0.722334	1	0	1	antisense	0	0	0
ENSG00000274021	AC024909.2	-1.27696	-0.528729	0	1	1	0	antisense	0	0	0
ENSG00000275719	AC008622.2	0	-1.63208	-0.997932	0	1	1	antisense	0	0	0
ENSG00000275993	SIK1B	-1.31739	-0.958343	0	1	1	0	protein_coding	0	0	0
ENSG00000277128	AL589743.4	-0.857053	-1.28933	0	1	1	0	lincRNA	0	0	0
ENSG00000278129	ZNF8	-0.507415	-0.502884	0.342017	1	1	0	protein_coding	0	0	0
ENSG00000279192	PWAR5	-2.14919	-0.813693	-0.428044	1	1	0	TEC	0	0	0
ENSG00000279407	AC007191.1	-0.874841	-0.553309	0	1	1	0	TEC	0	0	0
ENSG00000280018	CU634019.6	-0.626218	-0.526437	0	1	1	0	lincRNA	0	0	0
ENSG00000284491	THSD8	-0.625964	-0.76383	-0.343288	1	1	0	protein_coding	0	0	0
ENSG00000284981	AC093668.3	-1.05946	0	-1.09006	1	0	1	protein_coding	0	0	0

## Sheet: UP OVERLAP 3 CELLS
Ensembl ID	Gene Symbol	L2FC_1919	L2FC_3565	L2FC_BE2C	UP_1919	UP_3565	UP_BE2C	Gene Type
ENSG00000229953	AL590666.2	0.953796	0.933769	0.628617	1	1	1	antisense
ENSG00000255737	AGAP2-AS1	1.13366	0.781704	0.731731	1	1	1	antisense
ENSG00000272405	AL365181.3	0.685533	0.837748	0.630131	1	1	1	antisense
ENSG00000280798	LINC00294	0.500598	0.679179	0.738948	1	1	1	lincRNA
ENSG00000284879	AC133644.3	1.58069	0.75157	1.40073	1	1	1	processed_transcript
ENSG00000003249	DBNDD1	1.1688	0.64908	0.54576	1	1	1	protein_coding
ENSG00000004660	CAMKK1	0.804181	1.23908	0.66342	1	1	1	protein_coding
ENSG00000005238	FAM214B	0.644954	1.36684	1.04235	1	1	1	protein_coding
ENSG00000008853	RHOBTB2	0.83356	1.95032	0.518281	1	1	1	protein_coding
ENSG00000010404	IDS	1.27847	1.22276	0.637042	1	1	1	protein_coding
ENSG00000011021	CLCN6	0.579384	1.19493	0.664037	1	1	1	protein_coding
ENSG00000014914	MTMR11	0.643843	1.2378	0.933124	1	1	1	protein_coding
ENSG00000015592	STMN4	7.22508	6.75954	1.83876	1	1	1	protein_coding
ENSG00000047634	SCML1	0.984789	0.577839	1.17692	1	1	1	protein_coding
ENSG00000048342	CC2D2A	0.631938	1.0219	0.569849	1	1	1	protein_coding
ENSG00000052802	MSMO1	0.771825	0.98748	1.65821	1	1	1	protein_coding
ENSG00000054356	PTPRN	2.08185	2.2791	0.822466	1	1	1	protein_coding
ENSG00000059804	SLC2A3	0.897773	0.644408	1.55505	1	1	1	protein_coding
ENSG00000062282	DGAT2	0.626313	1.11107	1.16605	1	1	1	protein_coding
ENSG00000065970	FOXJ2	0.748158	0.751392	0.523328	1	1	1	protein_coding
ENSG00000067113	PLPP1	0.660178	1.00569	0.796383	1	1	1	protein_coding
ENSG00000075420	FNDC3B	0.585727	0.77035	0.549803	1	1	1	protein_coding
ENSG00000075945	KIFAP3	0.904332	0.747793	0.549052	1	1	1	protein_coding
ENSG00000080200	CRYBG3	0.739796	1.50605	0.530911	1	1	1	protein_coding
ENSG00000081181	ARG2	1.70992	3.32306	1.13421	1	1	1	protein_coding
ENSG00000081320	STK17B	1.30097	0.661182	0.811046	1	1	1	protein_coding
ENSG00000084444	FAM234B	1.15706	0.93184	0.775216	1	1	1	protein_coding
ENSG00000084731	KIF3C	0.721613	1.34167	0.684792	1	1	1	protein_coding
ENSG00000084764	MAPRE3	0.959143	1.08692	0.874796	1	1	1	protein_coding
ENSG00000085978	ATG16L1	0.63636	0.691474	0.554358	1	1	1	protein_coding
ENSG00000086730	LAT2	1.60994	2.53238	0.970051	1	1	1	protein_coding
ENSG00000087074	PPP1R15A	0.889957	1.99248	0.643765	1	1	1	protein_coding
ENSG00000087085	ACHE	1.08355	0.843979	1.38408	1	1	1	protein_coding
ENSG00000088367	EPB41L1	0.968764	0.623909	0.63378	1	1	1	protein_coding
ENSG00000092871	RFFL	0.866873	0.738717	0.761611	1	1	1	protein_coding
ENSG00000100320	RBFOX2	0.945899	1.13512	0.514711	1	1	1	protein_coding
ENSG00000100505	TRIM9	1.67266	0.717916	0.54867	1	1	1	protein_coding
ENSG00000100916	BRMS1L	0.947023	1.43672	0.666936	1	1	1	protein_coding
ENSG00000101255	TRIB3	1.34236	0.538375	0.819044	1	1	1	protein_coding
ENSG00000101350	KIF3B	0.630721	0.907977	0.613106	1	1	1	protein_coding
ENSG00000102098	SCML2	1.49109	1.43683	1.07881	1	1	1	protein_coding
ENSG00000102230	PCYT1B	0.69805	1.13204	0.930767	1	1	1	protein_coding
ENSG00000102781	KATNAL1	1.42873	1.56971	1.19421	1	1	1	protein_coding
ENSG00000102981	PARD6A	0.892674	2.18854	0.969408	1	1	1	protein_coding
ENSG00000104549	SQLE	0.604119	0.733865	0.59101	1	1	1	protein_coding
ENSG00000104643	MTMR9	0.934834	0.910526	0.532439	1	1	1	protein_coding
ENSG00000105514	RAB3D	0.655977	0.860443	0.867646	1	1	1	protein_coding
ENSG00000105855	ITGB8	1.5395	1.31059	1.31776	1	1	1	protein_coding
ENSG00000106366	SERPINE1	2.41025	1.25457	1.68297	1	1	1	protein_coding
ENSG00000106367	AP1S1	0.614806	0.680999	0.51154	1	1	1	protein_coding
ENSG00000106565	TMEM176B	1.34723	2.44877	0.952255	1	1	1	protein_coding
ENSG00000106948	AKNA	0.571769	1.39186	1.38068	1	1	1	protein_coding
ENSG00000107758	PPP3CB	0.534942	0.916421	0.730661	1	1	1	protein_coding
ENSG00000107819	SFXN3	0.945775	1.83886	0.625336	1	1	1	protein_coding
ENSG00000108861	DUSP3	1.61568	1.34156	0.575994	1	1	1	protein_coding
ENSG00000109436	TBC1D9	1.33491	2.03153	0.989453	1	1	1	protein_coding
ENSG00000109572	CLCN3	0.818584	0.988723	0.504818	1	1	1	protein_coding
ENSG00000110921	MVK	0.597728	1.18094	0.672347	1	1	1	protein_coding
ENSG00000111269	CREBL2	1.24288	0.771531	0.821221	1	1	1	protein_coding
ENSG00000111412	C12orf49	0.658987	0.543028	0.830381	1	1	1	protein_coding
ENSG00000112679	DUSP22	0.587145	0.951825	0.510043	1	1	1	protein_coding
ENSG00000112972	HMGCS1	1.13632	0.665779	1.42644	1	1	1	protein_coding
ENSG00000113070	HBEGF	0.769233	1.52012	0.61758	1	1	1	protein_coding
ENSG00000113161	HMGCR	0.830173	0.949088	0.770483	1	1	1	protein_coding
ENSG00000114544	SLC41A3	0.95	1.19519	0.872404	1	1	1	protein_coding
ENSG00000114739	ACVR2B	0.68308	1.57603	0.57741	1	1	1	protein_coding
ENSG00000115216	NRBP1	0.715434	0.950725	0.731042	1	1	1	protein_coding
ENSG00000116117	PARD3B	1.60898	0.688212	0.90201	1	1	1	protein_coding
ENSG00000116133	DHCR24	0.621855	0.750712	0.860683	1	1	1	protein_coding
ENSG00000116260	QSOX1	0.61409	0.671998	0.757576	1	1	1	protein_coding
ENSG00000116604	MEF2D	0.788392	0.856328	0.828176	1	1	1	protein_coding
ENSG00000116741	RGS2	1.07828	1.08144	0.663828	1	1	1	protein_coding
ENSG00000117335	CD46	1.6757	0.895377	0.770804	1	1	1	protein_coding
ENSG00000118257	NRP2	0.720628	1.00359	0.676991	1	1	1	protein_coding
ENSG00000118407	FILIP1	2.78314	3.60928	1.06673	1	1	1	protein_coding
ENSG00000119729	RHOQ	0.763211	0.72565	0.634877	1	1	1	protein_coding
ENSG00000121671	CRY2	1.1123	1.98535	0.521661	1	1	1	protein_coding
ENSG00000122042	UBL3	0.511366	0.646277	0.502473	1	1	1	protein_coding
ENSG00000123091	RNF11	0.926043	0.635141	1.88726	1	1	1	protein_coding
ENSG00000124574	ABCC10	0.590058	1.09668	0.568517	1	1	1	protein_coding
ENSG00000124788	ATXN1	0.8263	0.931594	0.542287	1	1	1	protein_coding
ENSG00000125355	TMEM255A	1.11922	2.56317	1.24997	1	1	1	protein_coding
ENSG00000125744	RTN2	0.906882	1.67648	0.540183	1	1	1	protein_coding
ENSG00000125864	BFSP1	1.23617	1.80877	1.25182	1	1	1	protein_coding
ENSG00000128245	YWHAH	0.979905	1.31797	0.73986	1	1	1	protein_coding
ENSG00000128266	GNAZ	1.27579	0.6375	0.523933	1	1	1	protein_coding
ENSG00000129226	CD68	1.00724	0.809747	1.07648	1	1	1	protein_coding
ENSG00000129355	CDKN2D	1.06501	1.00543	1.4983	1	1	1	protein_coding
ENSG00000130150	MOSPD2	1.03102	0.510544	0.857764	1	1	1	protein_coding
ENSG00000130779	CLIP1	0.796104	0.674592	0.839356	1	1	1	protein_coding
ENSG00000131725	WDR44	0.586808	0.558311	0.599139	1	1	1	protein_coding
ENSG00000132510	KDM6B	0.765351	0.551427	0.692093	1	1	1	protein_coding
ENSG00000132718	SYT11	1.37843	1.88834	0.653781	1	1	1	protein_coding
ENSG00000134109	EDEM1	0.863071	0.777583	0.870497	1	1	1	protein_coding
ENSG00000134508	CABLES1	0.798506	1.03911	0.895494	1	1	1	protein_coding
ENSG00000135090	TAOK3	0.560216	0.658194	0.685347	1	1	1	protein_coding
ENSG00000135439	AGAP2	2.19445	0.863962	0.832119	1	1	1	protein_coding
ENSG00000135519	KCNH3	1.29704	0.628929	1.25811	1	1	1	protein_coding
ENSG00000135905	DOCK10	1.10257	1.89087	0.633137	1	1	1	protein_coding
ENSG00000136052	SLC41A2	0.809123	0.626085	0.586178	1	1	1	protein_coding
ENSG00000136274	NACAD	2.64638	2.38586	0.814088	1	1	1	protein_coding
ENSG00000136531	SCN2A	0.999723	1.44452	0.789727	1	1	1	protein_coding
ENSG00000137261	KIAA0319	1.33049	2.45593	1.50138	1	1	1	protein_coding
ENSG00000139132	FGD4	0.668442	0.776951	0.805475	1	1	1	protein_coding
ENSG00000141012	GALNS	0.72434	0.811623	0.508013	1	1	1	protein_coding
ENSG00000141503	MINK1	0.552547	0.915202	0.741814	1	1	1	protein_coding
ENSG00000143164	DCAF6	1.50815	0.595789	1.2029	1	1	1	protein_coding
ENSG00000143375	CGN	1.15043	1.11667	0.784216	1	1	1	protein_coding
ENSG00000143473	KCNH1	1.60514	1.80992	2.51709	1	1	1	protein_coding
ENSG00000144655	CSRNP1	0.78937	1.56838	0.709369	1	1	1	protein_coding
ENSG00000144815	NXPE3	0.940239	0.555837	0.976489	1	1	1	protein_coding
ENSG00000145246	ATP10D	0.730988	1.23601	0.702523	1	1	1	protein_coding
ENSG00000146216	TTBK1	5.52734	1.72133	1.05247	1	1	1	protein_coding
ENSG00000146376	ARHGAP18	1.40192	1.97795	0.745364	1	1	1	protein_coding
ENSG00000151012	SLC7A11	0.695727	0.834909	1.78064	1	1	1	protein_coding
ENSG00000151320	AKAP6	1.12376	1.4101	0.868776	1	1	1	protein_coding
ENSG00000152061	RABGAP1L	1.04331	1.01036	0.559606	1	1	1	protein_coding
ENSG00000152332	UHMK1	0.757724	0.604928	0.870149	1	1	1	protein_coding
ENSG00000154928	EPHB1	1.89923	0.746476	1.3156	1	1	1	protein_coding
ENSG00000155099	PIP4P2	0.69443	1.04669	0.887877	1	1	1	protein_coding
ENSG00000155849	ELMO1	1.07838	2.31099	0.586494	1	1	1	protein_coding
ENSG00000155970	MICU3	0.722677	1.15601	1.29698	1	1	1	protein_coding
ENSG00000155980	KIF5A	1.06293	1.80049	0.770917	1	1	1	protein_coding
ENSG00000157224	CLDN12	1.17953	1.98376	0.64634	1	1	1	protein_coding
ENSG00000157600	TMEM164	0.513517	0.884071	0.553927	1	1	1	protein_coding
ENSG00000158109	TPRG1L	0.942177	2.26697	0.581842	1	1	1	protein_coding
ENSG00000158158	CNNM4	0.813127	0.651233	0.79614	1	1	1	protein_coding
ENSG00000158792	SPATA2L	0.901148	0.667844	0.866441	1	1	1	protein_coding
ENSG00000158856	DMTN	1.66077	0.745598	0.908962	1	1	1	protein_coding
ENSG00000159409	CELF3	3.31423	2.2769	0.874344	1	1	1	protein_coding
ENSG00000159733	ZFYVE28	0.92685	0.671151	1.25957	1	1	1	protein_coding
ENSG00000160190	SLC37A1	1.00042	2.62871	0.635205	1	1	1	protein_coding
ENSG00000160408	ST6GALNAC6	0.551705	0.538257	0.608949	1	1	1	protein_coding
ENSG00000161082	CELF5	2.57985	3.17064	1.98012	1	1	1	protein_coding
ENSG00000161677	JOSD2	0.605125	0.849332	0.537822	1	1	1	protein_coding
ENSG00000162188	GNG3	2.12641	4.55009	1.059	1	1	1	protein_coding
ENSG00000163273	NPPC	2.78077	1.76797	2.42544	1	1	1	protein_coding
ENSG00000163297	ANTXR2	0.614739	1.03789	0.915132	1	1	1	protein_coding
ENSG00000163577	EIF5A2	0.90599	0.519758	0.847385	1	1	1	protein_coding
ENSG00000163820	FYCO1	0.65836	0.513644	0.849659	1	1	1	protein_coding
ENSG00000164307	ERAP1	0.608406	1.11305	0.607788	1	1	1	protein_coding
ENSG00000164970	FAM219A	0.937992	1.03947	0.583948	1	1	1	protein_coding
ENSG00000165105	RASEF	1.05442	0.895882	0.700543	1	1	1	protein_coding
ENSG00000165233	CARD19	0.699934	0.682061	0.647333	1	1	1	protein_coding
ENSG00000165434	PGM2L1	0.957236	3.1634	1.44314	1	1	1	protein_coding
ENSG00000166401	SERPINB8	0.741037	3.36017	1.19627	1	1	1	protein_coding
ENSG00000166924	NYAP1	2.6873	1.0999	1.1235	1	1	1	protein_coding
ENSG00000166963	MAP1A	1.34091	0.808748	0.537624	1	1	1	protein_coding
ENSG00000167037	SGSM1	1.50001	2.33543	0.635625	1	1	1	protein_coding
ENSG00000167550	RHEBL1	0.807867	0.942896	1.12149	1	1	1	protein_coding
ENSG00000167702	KIFC2	0.831632	1.22848	1.24243	1	1	1	protein_coding
ENSG00000167778	SPRYD3	0.956929	1.04842	1.2053	1	1	1	protein_coding
ENSG00000167861	HID1	1.87966	1.07539	0.958073	1	1	1	protein_coding
ENSG00000168000	BSCL2	2.59948	4.27725	1.09792	1	1	1	protein_coding
ENSG00000168280	KIF5C	1.6761	1.03474	0.841402	1	1	1	protein_coding
ENSG00000169220	RGS14	1.68422	2.4282	0.857444	1	1	1	protein_coding
ENSG00000169991	IFFO2	0.772128	1.08996	1.41272	1	1	1	protein_coding
ENSG00000171533	MAP6	3.46045	2.38973	1.19136	1	1	1	protein_coding
ENSG00000171621	SPSB1	0.603994	1.01357	0.75633	1	1	1	protein_coding
ENSG00000171735	CAMTA1	0.752379	0.780966	0.515793	1	1	1	protein_coding
ENSG00000171877	FRMD5	1.10497	0.861294	0.588128	1	1	1	protein_coding
ENSG00000173801	JUP	0.968164	2.06915	0.76455	1	1	1	protein_coding
ENSG00000174839	DENND6A	0.801131	0.93611	0.759775	1	1	1	protein_coding
ENSG00000174996	KLC2	0.662211	1.21487	0.801685	1	1	1	protein_coding
ENSG00000175662	TOM1L2	0.551266	0.804566	0.681731	1	1	1	protein_coding
ENSG00000175764	TTLL11	0.994038	0.861576	0.595949	1	1	1	protein_coding
ENSG00000176049	JAKMIP2	1.10519	0.823687	0.558537	1	1	1	protein_coding
ENSG00000176055	MBLAC2	0.777037	0.544436	0.694829	1	1	1	protein_coding
ENSG00000177868	SVBP	0.510982	0.885274	0.8953	1	1	1	protein_coding
ENSG00000177875	CCDC184	2.62178	1.08904	0.973633	1	1	1	protein_coding
ENSG00000178764	ZHX2	0.536067	1.42562	1.04607	1	1	1	protein_coding
ENSG00000184545	DUSP8	0.732268	2.58955	0.640376	1	1	1	protein_coding
ENSG00000185621	LMLN	0.660772	0.788531	0.699822	1	1	1	protein_coding
ENSG00000186106	ANKRD46	0.874764	1.0911	0.771683	1	1	1	protein_coding
ENSG00000186340	THBS2	1.34786	1.47835	1.03652	1	1	1	protein_coding
ENSG00000186480	INSIG1	0.955783	0.828336	1.9191	1	1	1	protein_coding
ENSG00000186577	SMIM29	0.875794	0.853628	0.985066	1	1	1	protein_coding
ENSG00000186648	CARMIL3	1.39351	0.657091	0.534607	1	1	1	protein_coding
ENSG00000186806	VSIG10L	0.766875	0.700786	0.771487	1	1	1	protein_coding
ENSG00000187742	SECISBP2	1.33737	0.803257	0.598304	1	1	1	protein_coding
ENSG00000196172	ZNF681	0.969965	1.26256	0.537552	1	1	1	protein_coding
ENSG00000196542	SPTSSB	2.17103	4.68706	2.34041	1	1	1	protein_coding
ENSG00000196569	LAMA2	0.928745	1.86364	1.76625	1	1	1	protein_coding
ENSG00000197535	MYO5A	0.933196	0.82085	0.8779	1	1	1	protein_coding
ENSG00000197885	NKIRAS1	1.05892	0.580332	0.628513	1	1	1	protein_coding
ENSG00000198855	FICD	0.734003	0.707398	0.670851	1	1	1	protein_coding
ENSG00000204962	PCDHA8	2.60858	1.71717	1.01208	1	1	1	protein_coding
ENSG00000213719	CLIC1	0.754909	0.894953	0.858244	1	1	1	protein_coding
ENSG00000214575	CPEB1	1.1259	1.43466	0.66452	1	1	1	protein_coding
ENSG00000232434	AJM1	0.524885	1.20079	1.16656	1	1	1	protein_coding
ENSG00000243232	PCDHAC2	0.952401	1.4457	0.852249	1	1	1	protein_coding
ENSG00000256500	AL139300.1	0.85353	0.745978	0.542006	1	1	1	protein_coding
ENSG00000284308	C2orf81	0.707162	0.606183	0.567494	1	1	1	protein_coding
ENSG00000171084	FAM86JP	1.34448	1.13616	0.882261	1	1	1	transcribed_unprocessed_pseudogene

## Sheet: UP OVERLAP 2 CELLS
Ensembl ID	Gene Symbol	L2FC_1919	L2FC_3565	L2FC_BE2C	UP_1919	UP_3565	UP_BE2C	Gene Type
ENSG00000229953	AL590666.2	0.953796	0.933769	0.628617	1	1	1	antisense
ENSG00000255737	AGAP2-AS1	1.13366	0.781704	0.731731	1	1	1	antisense
ENSG00000272405	AL365181.3	0.685533	0.837748	0.630131	1	1	1	antisense
ENSG00000255495	AC145124.1	0.773602	2.12772	0	1	1	0	antisense
ENSG00000258377	AL139099.1	0	0.724092	0.614288	0	1	1	antisense
ENSG00000260630	SNAI3-AS1	0	1.19882	0.656546	0	1	1	antisense
ENSG00000117242	PINK1-AS	0.752346	1.04177	0	1	1	0	antisense
ENSG00000175147	TMEM51-AS1	1.28562	2.34196	0	1	1	0	antisense
ENSG00000242539	AC007620.2	0.736096	0	1.27411	1	0	1	antisense
ENSG00000248049	UBA6-AS1	0.646628	0.76104	0	1	1	0	antisense
ENSG00000260196	AC124798.1	0.500815	0	0.740151	1	0	1	antisense
ENSG00000268895	A1BG-AS1	0.4945	0.520145	0.507519	0	1	1	antisense
ENSG00000271122	AC018647.2	0.624488	0.507016	0	1	1	0	antisense
ENSG00000271474	AC106881.1	1.66327	0.8784	-0.326567	1	1	0	antisense
ENSG00000277449	CEBPB-AS1	0	0.964231	0.931721	0	1	1	antisense
ENSG00000233384	AC096537.1	1.14722	1.00139	0	1	1	0	bidirectional_promoter_lncRNA
ENSG00000280798	LINC00294	0.500598	0.679179	0.738948	1	1	1	lincRNA
ENSG00000259518	LINC01583	0	5.15166	1.73886	0	1	1	lincRNA
ENSG00000249306	LINC01411	1.5712	1.11332	0	1	1	0	lincRNA
ENSG00000188185	LINC00265	0.44162	0.855426	0.577735	0	1	1	lincRNA
ENSG00000225783	MIAT	1.40742	1.33271	-0.229643	1	1	0	lincRNA
ENSG00000226137	BAIAP2-DT	0	0.522227	0.910391	0	1	1	lincRNA
ENSG00000229891	LINC01315	0.572333	0.938594	0	1	1	0	lincRNA
ENSG00000243701	DUBR	0.775195	1.1139	0	1	1	0	lincRNA
ENSG00000244041	LINC01011	0	0.841249	1.09521	0	1	1	lincRNA
ENSG00000248161	AC098487.1	1.34394	1.56938	0	1	1	0	lincRNA
ENSG00000249846	LINC02021	0	1.40193	1.53036	0	1	1	lincRNA
ENSG00000254139	AC104051.2	1.07867	6.40419	0	1	1	0	lincRNA
ENSG00000272068	AL365181.2	0	0.589515	0.577016	0	1	1	lincRNA
ENSG00000280303	ERICD	1.00039	1.85059	0	1	1	0	lincRNA
ENSG00000213713	PIGCP1	0	0.802523	0.797285	0	1	1	processed_pseudogene
ENSG00000174028	FAM3C2	1.37341	0	0.819956	1	0	1	processed_pseudogene
ENSG00000284879	AC133644.3	1.58069	0.75157	1.40073	1	1	1	processed_transcript
ENSG00000237943	PRKCQ-AS1	0.530584	1.00895	0	1	1	0	processed_transcript
ENSG00000228794	LINC01128	0.81682	0.472439	0.517817	1	0	1	processed_transcript
ENSG00000003249	DBNDD1	1.1688	0.64908	0.54576	1	1	1	protein_coding
ENSG00000004660	CAMKK1	0.804181	1.23908	0.66342	1	1	1	protein_coding
ENSG00000005238	FAM214B	0.644954	1.36684	1.04235	1	1	1	protein_coding
ENSG00000008853	RHOBTB2	0.83356	1.95032	0.518281	1	1	1	protein_coding
ENSG00000010404	IDS	1.27847	1.22276	0.637042	1	1	1	protein_coding
ENSG00000011021	CLCN6	0.579384	1.19493	0.664037	1	1	1	protein_coding
ENSG00000014914	MTMR11	0.643843	1.2378	0.933124	1	1	1	protein_coding
ENSG00000015592	STMN4	7.22508	6.75954	1.83876	1	1	1	protein_coding
ENSG00000047634	SCML1	0.984789	0.577839	1.17692	1	1	1	protein_coding
ENSG00000048342	CC2D2A	0.631938	1.0219	0.569849	1	1	1	protein_coding
ENSG00000052802	MSMO1	0.771825	0.98748	1.65821	1	1	1	protein_coding
ENSG00000054356	PTPRN	2.08185	2.2791	0.822466	1	1	1	protein_coding
ENSG00000059804	SLC2A3	0.897773	0.644408	1.55505	1	1	1	protein_coding
ENSG00000062282	DGAT2	0.626313	1.11107	1.16605	1	1	1	protein_coding
ENSG00000065970	FOXJ2	0.748158	0.751392	0.523328	1	1	1	protein_coding
ENSG00000067113	PLPP1	0.660178	1.00569	0.796383	1	1	1	protein_coding
ENSG00000075420	FNDC3B	0.585727	0.77035	0.549803	1	1	1	protein_coding
ENSG00000075945	KIFAP3	0.904332	0.747793	0.549052	1	1	1	protein_coding
ENSG00000080200	CRYBG3	0.739796	1.50605	0.530911	1	1	1	protein_coding
ENSG00000081181	ARG2	1.70992	3.32306	1.13421	1	1	1	protein_coding
ENSG00000081320	STK17B	1.30097	0.661182	0.811046	1	1	1	protein_coding
ENSG00000084444	FAM234B	1.15706	0.93184	0.775216	1	1	1	protein_coding
ENSG00000084731	KIF3C	0.721613	1.34167	0.684792	1	1	1	protein_coding
ENSG00000084764	MAPRE3	0.959143	1.08692	0.874796	1	1	1	protein_coding
ENSG00000085978	ATG16L1	0.63636	0.691474	0.554358	1	1	1	protein_coding
ENSG00000086730	LAT2	1.60994	2.53238	0.970051	1	1	1	protein_coding
ENSG00000087074	PPP1R15A	0.889957	1.99248	0.643765	1	1	1	protein_coding
ENSG00000087085	ACHE	1.08355	0.843979	1.38408	1	1	1	protein_coding
ENSG00000088367	EPB41L1	0.968764	0.623909	0.63378	1	1	1	protein_coding
ENSG00000092871	RFFL	0.866873	0.738717	0.761611	1	1	1	protein_coding
ENSG00000100320	RBFOX2	0.945899	1.13512	0.514711	1	1	1	protein_coding
ENSG00000100505	TRIM9	1.67266	0.717916	0.54867	1	1	1	protein_coding
ENSG00000100916	BRMS1L	0.947023	1.43672	0.666936	1	1	1	protein_coding
ENSG00000101255	TRIB3	1.34236	0.538375	0.819044	1	1	1	protein_coding
ENSG00000101350	KIF3B	0.630721	0.907977	0.613106	1	1	1	protein_coding
ENSG00000102098	SCML2	1.49109	1.43683	1.07881	1	1	1	protein_coding
ENSG00000102230	PCYT1B	0.69805	1.13204	0.930767	1	1	1	protein_coding
ENSG00000102781	KATNAL1	1.42873	1.56971	1.19421	1	1	1	protein_coding
ENSG00000102981	PARD6A	0.892674	2.18854	0.969408	1	1	1	protein_coding
ENSG00000104549	SQLE	0.604119	0.733865	0.59101	1	1	1	protein_coding
ENSG00000104643	MTMR9	0.934834	0.910526	0.532439	1	1	1	protein_coding
ENSG00000105514	RAB3D	0.655977	0.860443	0.867646	1	1	1	protein_coding
ENSG00000105855	ITGB8	1.5395	1.31059	1.31776	1	1	1	protein_coding
ENSG00000106366	SERPINE1	2.41025	1.25457	1.68297	1	1	1	protein_coding
ENSG00000106367	AP1S1	0.614806	0.680999	0.51154	1	1	1	protein_coding
ENSG00000106565	TMEM176B	1.34723	2.44877	0.952255	1	1	1	protein_coding
ENSG00000106948	AKNA	0.571769	1.39186	1.38068	1	1	1	protein_coding
ENSG00000107758	PPP3CB	0.534942	0.916421	0.730661	1	1	1	protein_coding
ENSG00000107819	SFXN3	0.945775	1.83886	0.625336	1	1	1	protein_coding
ENSG00000108861	DUSP3	1.61568	1.34156	0.575994	1	1	1	protein_coding
ENSG00000109436	TBC1D9	1.33491	2.03153	0.989453	1	1	1	protein_coding
ENSG00000109572	CLCN3	0.818584	0.988723	0.504818	1	1	1	protein_coding
ENSG00000110921	MVK	0.597728	1.18094	0.672347	1	1	1	protein_coding
ENSG00000111269	CREBL2	1.24288	0.771531	0.821221	1	1	1	protein_coding
ENSG00000111412	C12orf49	0.658987	0.543028	0.830381	1	1	1	protein_coding
ENSG00000112679	DUSP22	0.587145	0.951825	0.510043	1	1	1	protein_coding
ENSG00000112972	HMGCS1	1.13632	0.665779	1.42644	1	1	1	protein_coding
ENSG00000113070	HBEGF	0.769233	1.52012	0.61758	1	1	1	protein_coding
ENSG00000113161	HMGCR	0.830173	0.949088	0.770483	1	1	1	protein_coding
ENSG00000114544	SLC41A3	0.95	1.19519	0.872404	1	1	1	protein_coding
ENSG00000114739	ACVR2B	0.68308	1.57603	0.57741	1	1	1	protein_coding
ENSG00000115216	NRBP1	0.715434	0.950725	0.731042	1	1	1	protein_coding
ENSG00000116117	PARD3B	1.60898	0.688212	0.90201	1	1	1	protein_coding
ENSG00000116133	DHCR24	0.621855	0.750712	0.860683	1	1	1	protein_coding
ENSG00000116260	QSOX1	0.61409	0.671998	0.757576	1	1	1	protein_coding
ENSG00000116604	MEF2D	0.788392	0.856328	0.828176	1	1	1	protein_coding
ENSG00000116741	RGS2	1.07828	1.08144	0.663828	1	1	1	protein_coding
ENSG00000117335	CD46	1.6757	0.895377	0.770804	1	1	1	protein_coding
ENSG00000118257	NRP2	0.720628	1.00359	0.676991	1	1	1	protein_coding
ENSG00000118407	FILIP1	2.78314	3.60928	1.06673	1	1	1	protein_coding
ENSG00000119729	RHOQ	0.763211	0.72565	0.634877	1	1	1	protein_coding
ENSG00000121671	CRY2	1.1123	1.98535	0.521661	1	1	1	protein_coding
ENSG00000122042	UBL3	0.511366	0.646277	0.502473	1	1	1	protein_coding
ENSG00000123091	RNF11	0.926043	0.635141	1.88726	1	1	1	protein_coding
ENSG00000124574	ABCC10	0.590058	1.09668	0.568517	1	1	1	protein_coding
ENSG00000124788	ATXN1	0.8263	0.931594	0.542287	1	1	1	protein_coding
ENSG00000125355	TMEM255A	1.11922	2.56317	1.24997	1	1	1	protein_coding
ENSG00000125744	RTN2	0.906882	1.67648	0.540183	1	1	1	protein_coding
ENSG00000125864	BFSP1	1.23617	1.80877	1.25182	1	1	1	protein_coding
ENSG00000128245	YWHAH	0.979905	1.31797	0.73986	1	1	1	protein_coding
ENSG00000128266	GNAZ	1.27579	0.6375	0.523933	1	1	1	protein_coding
ENSG00000129226	CD68	1.00724	0.809747	1.07648	1	1	1	protein_coding
ENSG00000129355	CDKN2D	1.06501	1.00543	1.4983	1	1	1	protein_coding
ENSG00000130150	MOSPD2	1.03102	0.510544	0.857764	1	1	1	protein_coding
ENSG00000130779	CLIP1	0.796104	0.674592	0.839356	1	1	1	protein_coding
ENSG00000131725	WDR44	0.586808	0.558311	0.599139	1	1	1	protein_coding
ENSG00000132510	KDM6B	0.765351	0.551427	0.692093	1	1	1	protein_coding
ENSG00000132718	SYT11	1.37843	1.88834	0.653781	1	1	1	protein_coding
ENSG00000134109	EDEM1	0.863071	0.777583	0.870497	1	1	1	protein_coding
ENSG00000134508	CABLES1	0.798506	1.03911	0.895494	1	1	1	protein_coding
ENSG00000135090	TAOK3	0.560216	0.658194	0.685347	1	1	1	protein_coding
ENSG00000135439	AGAP2	2.19445	0.863962	0.832119	1	1	1	protein_coding
ENSG00000135519	KCNH3	1.29704	0.628929	1.25811	1	1	1	protein_coding
ENSG00000135905	DOCK10	1.10257	1.89087	0.633137	1	1	1	protein_coding
ENSG00000136052	SLC41A2	0.809123	0.626085	0.586178	1	1	1	protein_coding
ENSG00000136274	NACAD	2.64638	2.38586	0.814088	1	1	1	protein_coding
ENSG00000136531	SCN2A	0.999723	1.44452	0.789727	1	1	1	protein_coding
ENSG00000137261	KIAA0319	1.33049	2.45593	1.50138	1	1	1	protein_coding
ENSG00000139132	FGD4	0.668442	0.776951	0.805475	1	1	1	protein_coding
ENSG00000141012	GALNS	0.72434	0.811623	0.508013	1	1	1	protein_coding
ENSG00000141503	MINK1	0.552547	0.915202	0.741814	1	1	1	protein_coding
ENSG00000143164	DCAF6	1.50815	0.595789	1.2029	1	1	1	protein_coding
ENSG00000143375	CGN	1.15043	1.11667	0.784216	1	1	1	protein_coding
ENSG00000143473	KCNH1	1.60514	1.80992	2.51709	1	1	1	protein_coding
ENSG00000144655	CSRNP1	0.78937	1.56838	0.709369	1	1	1	protein_coding
ENSG00000144815	NXPE3	0.940239	0.555837	0.976489	1	1	1	protein_coding
ENSG00000145246	ATP10D	0.730988	1.23601	0.702523	1	1	1	protein_coding
ENSG00000146216	TTBK1	5.52734	1.72133	1.05247	1	1	1	protein_coding
ENSG00000146376	ARHGAP18	1.40192	1.97795	0.745364	1	1	1	protein_coding
ENSG00000151012	SLC7A11	0.695727	0.834909	1.78064	1	1	1	protein_coding
ENSG00000151320	AKAP6	1.12376	1.4101	0.868776	1	1	1	protein_coding
ENSG00000152061	RABGAP1L	1.04331	1.01036	0.559606	1	1	1	protein_coding
ENSG00000152332	UHMK1	0.757724	0.604928	0.870149	1	1	1	protein_coding
ENSG00000154928	EPHB1	1.89923	0.746476	1.3156	1	1	1	protein_coding
ENSG00000155099	PIP4P2	0.69443	1.04669	0.887877	1	1	1	protein_coding
ENSG00000155849	ELMO1	1.07838	2.31099	0.586494	1	1	1	protein_coding
ENSG00000155970	MICU3	0.722677	1.15601	1.29698	1	1	1	protein_coding
ENSG00000155980	KIF5A	1.06293	1.80049	0.770917	1	1	1	protein_coding
ENSG00000157224	CLDN12	1.17953	1.98376	0.64634	1	1	1	protein_coding
ENSG00000157600	TMEM164	0.513517	0.884071	0.553927	1	1	1	protein_coding
ENSG00000158109	TPRG1L	0.942177	2.26697	0.581842	1	1	1	protein_coding
ENSG00000158158	CNNM4	0.813127	0.651233	0.79614	1	1	1	protein_coding
ENSG00000158792	SPATA2L	0.901148	0.667844	0.866441	1	1	1	protein_coding
ENSG00000158856	DMTN	1.66077	0.745598	0.908962	1	1	1	protein_coding
ENSG00000159409	CELF3	3.31423	2.2769	0.874344	1	1	1	protein_coding
ENSG00000159733	ZFYVE28	0.92685	0.671151	1.25957	1	1	1	protein_coding
ENSG00000160190	SLC37A1	1.00042	2.62871	0.635205	1	1	1	protein_coding
ENSG00000160408	ST6GALNAC6	0.551705	0.538257	0.608949	1	1	1	protein_coding
ENSG00000161082	CELF5	2.57985	3.17064	1.98012	1	1	1	protein_coding
ENSG00000161677	JOSD2	0.605125	0.849332	0.537822	1	1	1	protein_coding
ENSG00000162188	GNG3	2.12641	4.55009	1.059	1	1	1	protein_coding
ENSG00000163273	NPPC	2.78077	1.76797	2.42544	1	1	1	protein_coding
ENSG00000163297	ANTXR2	0.614739	1.03789	0.915132	1	1	1	protein_coding
ENSG00000163577	EIF5A2	0.90599	0.519758	0.847385	1	1	1	protein_coding
ENSG00000163820	FYCO1	0.65836	0.513644	0.849659	1	1	1	protein_coding
ENSG00000164307	ERAP1	0.608406	1.11305	0.607788	1	1	1	protein_coding
ENSG00000164970	FAM219A	0.937992	1.03947	0.583948	1	1	1	protein_coding
ENSG00000165105	RASEF	1.05442	0.895882	0.700543	1	1	1	protein_coding
ENSG00000165233	CARD19	0.699934	0.682061	0.647333	1	1	1	protein_coding
ENSG00000165434	PGM2L1	0.957236	3.1634	1.44314	1	1	1	protein_coding
ENSG00000166401	SERPINB8	0.741037	3.36017	1.19627	1	1	1	protein_coding
ENSG00000166924	NYAP1	2.6873	1.0999	1.1235	1	1	1	protein_coding
ENSG00000166963	MAP1A	1.34091	0.808748	0.537624	1	1	1	protein_coding
ENSG00000167037	SGSM1	1.50001	2.33543	0.635625	1	1	1	protein_coding
ENSG00000167550	RHEBL1	0.807867	0.942896	1.12149	1	1	1	protein_coding
ENSG00000167702	KIFC2	0.831632	1.22848	1.24243	1	1	1	protein_coding
ENSG00000167778	SPRYD3	0.956929	1.04842	1.2053	1	1	1	protein_coding
ENSG00000167861	HID1	1.87966	1.07539	0.958073	1	1	1	protein_coding
ENSG00000168000	BSCL2	2.59948	4.27725	1.09792	1	1	1	protein_coding
ENSG00000168280	KIF5C	1.6761	1.03474	0.841402	1	1	1	protein_coding
ENSG00000169220	RGS14	1.68422	2.4282	0.857444	1	1	1	protein_coding
ENSG00000169991	IFFO2	0.772128	1.08996	1.41272	1	1	1	protein_coding
ENSG00000171533	MAP6	3.46045	2.38973	1.19136	1	1	1	protein_coding
ENSG00000171621	SPSB1	0.603994	1.01357	0.75633	1	1	1	protein_coding
ENSG00000171735	CAMTA1	0.752379	0.780966	0.515793	1	1	1	protein_coding
ENSG00000171877	FRMD5	1.10497	0.861294	0.588128	1	1	1	protein_coding
ENSG00000173801	JUP	0.968164	2.06915	0.76455	1	1	1	protein_coding
ENSG00000174839	DENND6A	0.801131	0.93611	0.759775	1	1	1	protein_coding
ENSG00000174996	KLC2	0.662211	1.21487	0.801685	1	1	1	protein_coding
ENSG00000175662	TOM1L2	0.551266	0.804566	0.681731	1	1	1	protein_coding
ENSG00000175764	TTLL11	0.994038	0.861576	0.595949	1	1	1	protein_coding
ENSG00000176049	JAKMIP2	1.10519	0.823687	0.558537	1	1	1	protein_coding
ENSG00000176055	MBLAC2	0.777037	0.544436	0.694829	1	1	1	protein_coding
ENSG00000177868	SVBP	0.510982	0.885274	0.8953	1	1	1	protein_coding
ENSG00000177875	CCDC184	2.62178	1.08904	0.973633	1	1	1	protein_coding
ENSG00000178764	ZHX2	0.536067	1.42562	1.04607	1	1	1	protein_coding
ENSG00000184545	DUSP8	0.732268	2.58955	0.640376	1	1	1	protein_coding
ENSG00000185621	LMLN	0.660772	0.788531	0.699822	1	1	1	protein_coding
ENSG00000186106	ANKRD46	0.874764	1.0911	0.771683	1	1	1	protein_coding
ENSG00000186340	THBS2	1.34786	1.47835	1.03652	1	1	1	protein_coding
ENSG00000186480	INSIG1	0.955783	0.828336	1.9191	1	1	1	protein_coding
ENSG00000186577	SMIM29	0.875794	0.853628	0.985066	1	1	1	protein_coding
ENSG00000186648	CARMIL3	1.39351	0.657091	0.534607	1	1	1	protein_coding
ENSG00000186806	VSIG10L	0.766875	0.700786	0.771487	1	1	1	protein_coding
ENSG00000187742	SECISBP2	1.33737	0.803257	0.598304	1	1	1	protein_coding
ENSG00000196172	ZNF681	0.969965	1.26256	0.537552	1	1	1	protein_coding
ENSG00000196542	SPTSSB	2.17103	4.68706	2.34041	1	1	1	protein_coding
ENSG00000196569	LAMA2	0.928745	1.86364	1.76625	1	1	1	protein_coding
ENSG00000197535	MYO5A	0.933196	0.82085	0.8779	1	1	1	protein_coding
ENSG00000197885	NKIRAS1	1.05892	0.580332	0.628513	1	1	1	protein_coding
ENSG00000198855	FICD	0.734003	0.707398	0.670851	1	1	1	protein_coding
ENSG00000204962	PCDHA8	2.60858	1.71717	1.01208	1	1	1	protein_coding
ENSG00000213719	CLIC1	0.754909	0.894953	0.858244	1	1	1	protein_coding
ENSG00000214575	CPEB1	1.1259	1.43466	0.66452	1	1	1	protein_coding
ENSG00000232434	AJM1	0.524885	1.20079	1.16656	1	1	1	protein_coding
ENSG00000243232	PCDHAC2	0.952401	1.4457	0.852249	1	1	1	protein_coding
ENSG00000256500	AL139300.1	0.85353	0.745978	0.542006	1	1	1	protein_coding
ENSG00000284308	C2orf81	0.707162	0.606183	0.567494	1	1	1	protein_coding
ENSG00000053747	LAMA3	0	1.92931	1.43188	0	1	1	protein_coding
ENSG00000085491	SLC25A24	1.31537	1.003	0	1	1	0	protein_coding
ENSG00000102271	KLHL4	0.619264	2.09517	0	1	1	0	protein_coding
ENSG00000103154	NECAB2	0.64272	0.548411	0	1	1	0	protein_coding
ENSG00000104324	CPQ	0.719257	0.67774	0	1	1	0	protein_coding
ENSG00000113361	CDH6	1.95408	1.88467	0	1	1	0	protein_coding
ENSG00000119946	CNNM1	0.744567	1.13577	0	1	1	0	protein_coding
ENSG00000141338	ABCA8	0.606333	1.92913	0	1	1	0	protein_coding
ENSG00000153956	CACNA2D1	0	0.956876	0.770973	0	1	1	protein_coding
ENSG00000166317	SYNPO2L	1.56834	3.36749	0	1	1	0	protein_coding
ENSG00000167880	EVPL	0	2.39856	1.47991	0	1	1	protein_coding
ENSG00000167995	BEST1	0	0.729172	0.710699	0	1	1	protein_coding
ENSG00000169432	SCN9A	0	1.28923	1.07237	0	1	1	protein_coding
ENSG00000169908	TM4SF1	1.39368	1.20252	0	1	1	0	protein_coding
ENSG00000173705	SUSD5	1.20026	1.42599	0	1	1	0	protein_coding
ENSG00000176472	ZNF575	0	1.19515	2.17733	0	1	1	protein_coding
ENSG00000181652	ATG9B	0	0.918693	0.659688	0	1	1	protein_coding
ENSG00000186472	PCLO	0	2.89366	0.5774	0	1	1	protein_coding
ENSG00000262621	AC025283.2	1.05987	6.41823	0	1	1	0	protein_coding
ENSG00000274349	ZNF658	0.585894	0.7377	0	1	1	0	protein_coding
ENSG00000002746	HECW1	1.70821	1.81291	0	1	1	0	protein_coding
ENSG00000007516	BAIAP3	0.81996	2.35003	0	1	1	0	protein_coding
ENSG00000008513	ST3GAL1	0.58629	1.86881	0	1	1	0	protein_coding
ENSG00000077264	PAK3	0	1.52623	0.765903	0	1	1	protein_coding
ENSG00000091137	SLC26A4	1.10922	1.293	0	1	1	0	protein_coding
ENSG00000092051	JPH4	0	2.11345	0.559682	0	1	1	protein_coding
ENSG00000092054	MYH7	1.78893	0.869478	0	1	1	0	protein_coding
ENSG00000100078	PLA2G3	1.34586	1.57815	0	1	1	0	protein_coding
ENSG00000101670	LIPG	1.04332	2.19252	0	1	1	0	protein_coding
ENSG00000101695	RNF125	0.799666	2.111	0	1	1	0	protein_coding
ENSG00000102048	ASB9	0.983023	1.31765	0	1	1	0	protein_coding
ENSG00000111834	RSPH4A	0	2.43722	1.05769	0	1	1	protein_coding
ENSG00000111981	ULBP1	1.06055	0.803938	0	1	1	0	protein_coding
ENSG00000112530	PACRG	2.67621	1.81061	0	1	1	0	protein_coding
ENSG00000114529	C3orf52	1.58348	1.89003	0	1	1	0	protein_coding
ENSG00000115423	DNAH6	1.35165	0.920663	0	1	1	0	protein_coding
ENSG00000115594	IL1R1	0.534843	1.33879	0	1	1	0	protein_coding
ENSG00000115828	QPCT	0	1.64226	0.780973	0	1	1	protein_coding
ENSG00000118971	CCND2	0.622136	0.810643	0	1	1	0	protein_coding
ENSG00000119714	GPR68	0	2.87361	0.70511	0	1	1	protein_coding
ENSG00000126106	TMEM53	0.569529	0.708836	0	1	1	0	protein_coding
ENSG00000129990	SYT5	0	2.85086	1.02293	0	1	1	protein_coding
ENSG00000130176	CNN1	2.61562	4.38347	0	1	1	0	protein_coding
ENSG00000131015	ULBP2	1.4527	0	1.247	1	0	1	protein_coding
ENSG00000134070	IRAK2	0.953312	1.51986	0	1	1	0	protein_coding
ENSG00000135549	PKIB	0.993963	1.11789	0	1	1	0	protein_coding
ENSG00000136546	SCN7A	0	3.65415	2.19773	0	1	1	protein_coding
ENSG00000136999	NOV	0.631259	2.54142	0	1	1	0	protein_coding
ENSG00000137843	PAK6	1.70046	1.91302	0	1	1	0	protein_coding
ENSG00000138623	SEMA7A	0	0.718118	1.27192	0	1	1	protein_coding
ENSG00000142197	DOP1B	0.563258	0.512324	0	1	1	0	protein_coding
ENSG00000142871	CYR61	0.975232	0.598316	0	1	1	0	protein_coding
ENSG00000143127	ITGA10	1.8293	1.38107	0	1	1	0	protein_coding
ENSG00000146555	SDK1	0.870058	0.566178	0	1	1	0	protein_coding
ENSG00000149575	SCN2B	1.20281	1.04244	0	1	1	0	protein_coding
ENSG00000151023	ENKUR	0.931908	0.67547	0	1	1	0	protein_coding
ENSG00000153012	LGI2	0.795424	3.95614	0	1	1	0	protein_coding
ENSG00000154127	UBASH3B	0.761582	0.824781	0	1	1	0	protein_coding
ENSG00000158555	GDPD5	0	0.651384	0.623471	0	1	1	protein_coding
ENSG00000158816	VWA5B1	1.70954	1.80604	0	1	1	0	protein_coding
ENSG00000158887	MPZ	0	3.51466	1.12153	0	1	1	protein_coding
ENSG00000160188	RSPH1	1.13738	1.9312	0	1	1	0	protein_coding
ENSG00000160712	IL6R	1.31174	2.26995	0	1	1	0	protein_coding
ENSG00000162976	PQLC3	1.02286	0.874113	0	1	1	0	protein_coding
ENSG00000164220	F2RL2	2.56092	6.27984	0	1	1	0	protein_coding
ENSG00000164855	TMEM184A	0.936466	1.64572	0	1	1	0	protein_coding
ENSG00000166501	PRKCB	0.974128	2.12612	0	1	1	0	protein_coding
ENSG00000166900	STX3	0.894702	2.44357	0	1	1	0	protein_coding
ENSG00000167103	PIP5KL1	1.40615	1.73802	0	1	1	0	protein_coding
ENSG00000168646	AXIN2	0.951947	0.561613	0	1	1	0	protein_coding
ENSG00000169760	NLGN1	2.65289	0.732165	0	1	1	0	protein_coding
ENSG00000170006	TMEM154	0.595881	3.73565	0	1	1	0	protein_coding
ENSG00000171450	CDK5R2	0	1.57956	0.692091	0	1	1	protein_coding
ENSG00000173947	PIFO	0.77993	1.8016	0	1	1	0	protein_coding
ENSG00000174500	GCSAM	0.954645	1.96253	0	1	1	0	protein_coding
ENSG00000174521	TTC9B	0	3.35931	1.63878	0	1	1	protein_coding
ENSG00000174607	UGT8	0.933678	0.584241	0	1	1	0	protein_coding
ENSG00000175077	RTP1	2.99639	0	0.684049	1	0	1	protein_coding
ENSG00000176383	B3GNT4	1.21234	0	0.964553	1	0	1	protein_coding
ENSG00000178796	RIIAD1	0	2.64555	0.677523	0	1	1	protein_coding
ENSG00000179292	TMEM151A	0	2.84011	0.665261	0	1	1	protein_coding
ENSG00000186792	HYAL3	0	1.18094	0.917546	0	1	1	protein_coding
ENSG00000196371	FUT4	1.34636	0	0.662583	1	0	1	protein_coding
ENSG00000197106	SLC6A17	0	2.89509	0.664661	0	1	1	protein_coding
ENSG00000197769	MAP1LC3C	1.06754	2.87153	0	1	1	0	protein_coding
ENSG00000204347	BTBD17	1.94596	1.7256	0	1	1	0	protein_coding
ENSG00000204396	VWA7	0	2.79473	1.72478	0	1	1	protein_coding
ENSG00000205277	MUC12	0.973897	0.732226	0	1	1	0	protein_coding
ENSG00000213654	GPSM3	1.5569	1.18885	0	1	1	0	protein_coding
ENSG00000214562	NUTM2D	0	1.4149	0.639701	0	1	1	protein_coding
ENSG00000248383	PCDHAC1	0	1.81804	0.700511	0	1	1	protein_coding
ENSG00000266094	RASSF5	0.818096	1.10111	0	1	1	0	protein_coding
ENSG00000267909	CCDC177	4.06969	4.05526	0	1	1	0	protein_coding
ENSG00000274750	HIST1H3E	0	2.08054	0.644911	0	1	1	protein_coding
ENSG00000001461	NIPAL3	0.545581	0.810982	0	1	1	0	protein_coding
ENSG00000001630	CYP51A1	0.522435	0	0.68035	1	0	1	protein_coding
ENSG00000002586	CD99	0.503305	0.556779	0	1	1	0	protein_coding
ENSG00000004139	SARM1	0.678503	0.593523	0.21926	1	1	0	protein_coding
ENSG00000006327	TNFRSF12A	0.835765	-0.295655	1.8118	1	0	1	protein_coding
ENSG00000006756	ARSD	0	1.66251	0.715631	0	1	1	protein_coding
ENSG00000007168	PAFAH1B1	1.23964	0.584413	0.317364	1	1	0	protein_coding
ENSG00000007944	MYLIP	0	1.22003	0.544794	0	1	1	protein_coding
ENSG00000008056	SYN1	1.3781	0.460961	0.73862	1	0	1	protein_coding
ENSG00000008735	MAPK8IP2	0.913991	2.18097	0	1	1	0	protein_coding
ENSG00000010270	STARD3NL	0.647615	0.633743	0.395236	1	1	0	protein_coding
ENSG00000012232	EXTL3	0.649206	1.2368	0.206879	1	1	0	protein_coding
ENSG00000013016	EHD3	1.48449	0	0.640793	1	0	1	protein_coding
ENSG00000013288	MAN2B2	0.86456	0.783488	0	1	1	0	protein_coding
ENSG00000019485	PRDM11	0.554194	1.60591	0	1	1	0	protein_coding
ENSG00000023191	RNH1	0.517779	0	0.644518	1	0	1	protein_coding
ENSG00000024422	EHD2	0.584935	0.784161	0.472593	1	1	0	protein_coding
ENSG00000026508	CD44	0.827574	0.756757	0.301917	1	1	0	protein_coding
ENSG00000026652	AGPAT4	0.322546	1.61924	0.806743	0	1	1	protein_coding
ENSG00000028203	VEZT	0.533726	0.521512	0.225107	1	1	0	protein_coding
ENSG00000029153	ARNTL2	0.529461	1.06195	0	1	1	0	protein_coding
ENSG00000034152	MAP2K3	0.503957	0.703396	0.44764	1	1	0	protein_coding
ENSG00000035862	TIMP2	0.781897	0.854699	-0.170724	1	1	0	protein_coding
ENSG00000039139	DNAH5	1.40038	1.40881	0	1	1	0	protein_coding
ENSG00000040608	RTN4R	0	0.85045	0.515307	0	1	1	protein_coding
ENSG00000041353	RAB27B	0	6.37737	1.59961	0	1	1	protein_coding
ENSG00000047597	XK	1.41677	3.00254	0	1	1	0	protein_coding
ENSG00000048140	TSPAN17	0.410935	0.576342	0.76267	0	1	1	protein_coding
ENSG00000049192	ADAMTS6	0	1.16769	1.43755	0	1	1	protein_coding
ENSG00000049246	PER3	0.607782	0	0.709512	1	0	1	protein_coding
ENSG00000050438	SLC4A8	1.69192	1.19501	0.378995	1	1	0	protein_coding
ENSG00000053108	FSTL4	0	3.89829	1.01675	0	1	1	protein_coding
ENSG00000054392	HHAT	0	1.99584	0.989317	0	1	1	protein_coding
ENSG00000055163	CYFIP2	0.721116	0.450018	0.933093	1	0	1	protein_coding
ENSG00000058091	CDK14	1.40186	0.838523	0	1	1	0	protein_coding
ENSG00000058866	DGKG	0.877545	1.80813	0.489135	1	1	0	protein_coding
ENSG00000059915	PSD	1.72083	0	0.599723	1	0	1	protein_coding
ENSG00000063180	CA11	0.457584	1.39656	1.34168	0	1	1	protein_coding
ENSG00000064225	ST3GAL6	1.03006	1.74557	-0.170785	1	1	0	protein_coding
ENSG00000064651	SLC12A2	0.577152	0.929203	-0.391573	1	1	0	protein_coding
ENSG00000065833	ME1	0.694636	0	0.737389	1	0	1	protein_coding
ENSG00000066117	SMARCD1	0.837396	0.688299	-0.13951	1	1	0	protein_coding
ENSG00000066933	MYO9A	0.503716	0.618647	0.488194	1	1	0	protein_coding
ENSG00000067064	IDI1	0.574459	0.464217	0.630772	1	0	1	protein_coding
ENSG00000067082	KLF6	0.50836	1.27312	0.149434	1	1	0	protein_coding
ENSG00000067606	PRKCZ	0.875616	0	1.06312	1	0	1	protein_coding
ENSG00000068305	MEF2A	0.51742	0.854538	-0.168781	1	1	0	protein_coding
ENSG00000068323	TFE3	0.358511	0.720626	1.1046	0	1	1	protein_coding
ENSG00000068971	PPP2R5B	0.637573	0.965531	0.44123	1	1	0	protein_coding
ENSG00000070778	PTPN21	0	1.28948	0.516403	0	1	1	protein_coding
ENSG00000071242	RPS6KA2	0.516909	0.907997	-0.415259	1	1	0	protein_coding
ENSG00000072201	LNX1	0.887148	1.26107	0	1	1	0	protein_coding
ENSG00000072832	CRMP1	0.830889	0.830981	0.109981	1	1	0	protein_coding
ENSG00000073792	IGF2BP2	0.609153	0.663452	0	1	1	0	protein_coding
ENSG00000073849	ST6GAL1	0	1.79245	0.618362	0	1	1	protein_coding
ENSG00000073910	FRY	0.652109	0.96754	0.197335	1	1	0	protein_coding
ENSG00000076067	RBMS2	0.801523	0.524536	0	1	1	0	protein_coding
ENSG00000076641	PAG1	0.669157	1.65656	-0.293852	1	1	0	protein_coding
ENSG00000078177	N4BP2	0.919283	0.852584	0	1	1	0	protein_coding
ENSG00000079150	FKBP7	0.700952	0.522957	0	1	1	0	protein_coding
ENSG00000079459	FDFT1	0.539211	0	1.18292	1	0	1	protein_coding
ENSG00000080166	DCT	2.68722	1.68124	0	1	1	0	protein_coding
ENSG00000082458	DLG3	0.906127	0.733042	0	1	1	0	protein_coding
ENSG00000082641	NFE2L1	0.694373	0.644182	0.266218	1	1	0	protein_coding
ENSG00000082805	ERC1	0.64912	1.11044	0.405632	1	1	0	protein_coding
ENSG00000084710	EFR3B	0.849838	1.04062	0	1	1	0	protein_coding
ENSG00000085433	WDR47	0.721938	0.403856	0.806095	1	0	1	protein_coding
ENSG00000086015	MAST2	0.528619	0.529248	0.26362	1	1	0	protein_coding
ENSG00000086289	EPDR1	0.574805	0.540552	0	1	1	0	protein_coding
ENSG00000088992	TESC	1.3924	2.1501	0	1	1	0	protein_coding
ENSG00000089169	RPH3A	2.75441	2.10378	-0.431921	1	1	0	protein_coding
ENSG00000089693	MLF2	0.696577	0	0.536559	1	0	1	protein_coding
ENSG00000090006	LTBP4	0.633814	0	0.573672	1	0	1	protein_coding
ENSG00000090013	BLVRB	0.877408	0	2.36208	1	0	1	protein_coding
ENSG00000091409	ITGA6	0.416937	1.01048	1.02384	0	1	1	protein_coding
ENSG00000091428	RAPGEF4	0.930006	0.562564	0	1	1	0	protein_coding
ENSG00000091592	NLRP1	1.51456	0.4861	0.829003	1	0	1	protein_coding
ENSG00000092964	DPYSL2	0.562952	1.19065	0.117671	1	1	0	protein_coding
ENSG00000094631	HDAC6	0.409052	0.70069	0.572482	0	1	1	protein_coding
ENSG00000095370	SH2D3C	4.35151	2.75178	0.480321	1	1	0	protein_coding
ENSG00000097021	ACOT7	0.610637	0.609639	0.318751	1	1	0	protein_coding
ENSG00000099194	SCD	0.814164	-0.365778	0.707472	1	0	1	protein_coding
ENSG00000099785	43892	0.646935	0	0.714771	1	0	1	protein_coding
ENSG00000100100	PIK3IP1	0.510785	0.768696	0.35155	1	1	0	protein_coding
ENSG00000100228	RAB36	0.35228	0.759666	0.533016	0	1	1	protein_coding
ENSG00000100307	CBX7	0	0.795049	0.767701	0	1	1	protein_coding
ENSG00000100364	KIAA0930	0.616723	0.475748	0.669697	1	0	1	protein_coding
ENSG00000100376	FAM118A	0.687988	0.778147	0.182141	1	1	0	protein_coding
ENSG00000100647	SUSD6	0.618269	0.656606	0	1	1	0	protein_coding
ENSG00000100697	DICER1	0.530936	1.04538	0.136711	1	1	0	protein_coding
ENSG00000101096	NFATC2	1.70001	2.17913	0	1	1	0	protein_coding
ENSG00000101311	FERMT1	0.58377	1.16443	0	1	1	0	protein_coding
ENSG00000101974	ATP11C	0.559416	0.552045	0.484861	1	1	0	protein_coding
ENSG00000102003	SYP	1.68854	0.946159	0.29418	1	1	0	protein_coding
ENSG00000102096	PIM2	0.606252	0	0.766984	1	0	1	protein_coding
ENSG00000102316	MAGED2	0.574159	0.533246	0	1	1	0	protein_coding
ENSG00000102359	SRPX2	0.96041	3.43077	0	1	1	0	protein_coding
ENSG00000102780	DGKH	0	0.600689	0.789141	0	1	1	protein_coding
ENSG00000102996	MMP15	0	0.88464	0.621654	0	1	1	protein_coding
ENSG00000103034	NDRG4	0.783114	0.670167	0.348437	1	1	0	protein_coding
ENSG00000103145	HCFC1R1	0.578784	0.331136	0.693378	1	0	1	protein_coding
ENSG00000103187	COTL1	0.555044	0	0.649201	1	0	1	protein_coding
ENSG00000103647	CORO2B	0.848294	0.338252	0.905667	1	0	1	protein_coding
ENSG00000103888	CEMIP	1.80246	3.17579	0	1	1	0	protein_coding
ENSG00000104112	SCG3	1.07165	2.3205	-0.244488	1	1	0	protein_coding
ENSG00000104231	ZFAND1	0.58919	0	0.502333	1	0	1	protein_coding
ENSG00000104327	CALB1	0.744653	3.927	0	1	1	0	protein_coding
ENSG00000104415	WISP1	1.02144	7.76394	0	1	1	0	protein_coding
ENSG00000104419	NDRG1	0.727918	4.0691	0	1	1	0	protein_coding
ENSG00000104490	NCALD	0.572431	0.733575	0.247287	1	1	0	protein_coding
ENSG00000104946	TBC1D17	0.309821	0.690134	0.728402	0	1	1	protein_coding
ENSG00000104998	IL27RA	0.837855	0	1.16574	1	0	1	protein_coding
ENSG00000105223	PLD3	0.905226	0.460269	0.501781	1	0	1	protein_coding
ENSG00000105245	NUMBL	0.739808	0	0.683676	1	0	1	protein_coding
ENSG00000105254	TBCB	0.553279	0.508482	0.377135	1	1	0	protein_coding
ENSG00000105290	APLP1	0.800202	1.02063	0.225386	1	1	0	protein_coding
ENSG00000105409	ATP1A3	1.3819	0.742727	-0.20317	1	1	0	protein_coding
ENSG00000105499	PLA2G4C	0	1.85202	1.07086	0	1	1	protein_coding
ENSG00000105649	RAB3A	0.990976	0	1.84661	1	0	1	protein_coding
ENSG00000105963	ADAP1	1.36801	0	0.516943	1	0	1	protein_coding
ENSG00000106069	CHN2	1.32801	2.43615	0	1	1	0	protein_coding
ENSG00000106089	STX1A	-0.356845	0.922405	0.573053	0	1	1	protein_coding
ENSG00000106701	FSD1L	0	0.632894	0.699639	0	1	1	protein_coding
ENSG00000106772	PRUNE2	1.22009	1.4516	0.195029	1	1	0	protein_coding
ENSG00000107105	ELAVL2	0	2.42245	0.643016	0	1	1	protein_coding
ENSG00000107282	APBA1	0.928318	1.80689	-0.191362	1	1	0	protein_coding
ENSG00000107338	SHB	0	0.984989	0.543713	0	1	1	protein_coding
ENSG00000107438	PDLIM1	0.581071	0.51015	0	1	1	0	protein_coding
ENSG00000107560	RAB11FIP2	0.572664	0.790339	0.404052	1	1	0	protein_coding
ENSG00000107611	CUBN	0.588481	0	1.66642	1	0	1	protein_coding
ENSG00000107614	TRDMT1	0	0.605462	0.70816	0	1	1	protein_coding
ENSG00000109089	CDR2L	0.992145	0.365556	0.76972	1	0	1	protein_coding
ENSG00000109171	SLAIN2	0.302398	0.551995	0.940671	0	1	1	protein_coding
ENSG00000109265	KIAA1211	0.612804	0.511257	0	1	1	0	protein_coding
ENSG00000109654	TRIM2	0.988562	0.735629	0.206523	1	1	0	protein_coding
ENSG00000109929	SC5D	1.44491	0.520499	0.404342	1	1	0	protein_coding
ENSG00000110427	KIAA1549L	0.814455	1.40481	0	1	1	0	protein_coding
ENSG00000110888	CAPRIN2	0	0.884279	0.529935	0	1	1	protein_coding
ENSG00000111224	PARP11	1.11994	0.840099	0	1	1	0	protein_coding
ENSG00000111261	MANSC1	0.528081	1.22242	0.348064	1	1	0	protein_coding
ENSG00000111371	SLC38A1	0.758884	0.659437	0.191476	1	1	0	protein_coding
ENSG00000111670	GNPTAB	0.710103	0.804937	0.253419	1	1	0	protein_coding
ENSG00000111859	NEDD9	0.946901	1.10239	0	1	1	0	protein_coding
ENSG00000111885	MAN1A1	0.811673	1.67681	-0.331785	1	1	0	protein_coding
ENSG00000112033	PPARD	0.570035	0	0.624619	1	0	1	protein_coding
ENSG00000112290	WASF1	0.720636	0.56114	0.387596	1	1	0	protein_coding
ENSG00000112378	PERP	2.10964	0.990362	0	1	1	0	protein_coding
ENSG00000112511	PHF1	0.421042	0.712339	0.667036	0	1	1	protein_coding
ENSG00000112539	C6orf118	1.13263	0.559477	0	1	1	0	protein_coding
ENSG00000112763	BTN2A1	0	0.634823	0.73687	0	1	1	protein_coding
ENSG00000113108	APBB3	0	0.941245	0.952915	0	1	1	protein_coding
ENSG00000113263	ITK	2.11785	1.44492	0	1	1	0	protein_coding
ENSG00000114450	GNB4	0.639273	0.367294	0.717706	1	0	1	protein_coding
ENSG00000114670	NEK11	0	1.02902	1.01664	0	1	1	protein_coding
ENSG00000115295	CLIP4	0	2.2866	0.606355	0	1	1	protein_coding
ENSG00000115318	LOXL3	0.960273	0.926549	-0.326949	1	1	0	protein_coding
ENSG00000115325	DOK1	0.562118	0.506459	0	1	1	0	protein_coding
ENSG00000115520	COQ10B	0.619988	0	0.80854	1	0	1	protein_coding
ENSG00000115935	WIPF1	0.775671	0.902876	-0.378112	1	1	0	protein_coding
ENSG00000115993	TRAK2	0.882296	1.13786	0.394683	1	1	0	protein_coding
ENSG00000116138	DNAJC16	0.505715	0.866633	0.365181	1	1	0	protein_coding
ENSG00000116675	DNAJC6	2.12066	1.89725	0.483405	1	1	0	protein_coding
ENSG00000116985	BMP8B	0	0.685506	0.766347	0	1	1	protein_coding
ENSG00000117020	AKT3	1.13503	0	0.592184	1	0	1	protein_coding
ENSG00000117151	CTBS	0.80777	0	0.558034	1	0	1	protein_coding
ENSG00000117586	TNFSF4	0	2.49372	1.47967	0	1	1	protein_coding
ENSG00000117758	STX12	0.607006	0.565376	0.431176	1	1	0	protein_coding
ENSG00000118200	CAMSAP2	0.643309	0.47633	0.530003	1	0	1	protein_coding
ENSG00000118263	KLF7	0.605344	0.758164	0.404666	1	1	0	protein_coding
ENSG00000118680	MYL12B	0.583411	0.575773	0	1	1	0	protein_coding
ENSG00000118762	PKD2	0.739459	1.20803	0.222112	1	1	0	protein_coding
ENSG00000118777	ABCG2	1.0712	2.46338	0	1	1	0	protein_coding
ENSG00000118785	SPP1	1.00724	3.41468	0	1	1	0	protein_coding
ENSG00000118894	EEF2KMT	0.835158	0	0.55939	1	0	1	protein_coding
ENSG00000118960	HS1BP3	0.547749	0.607263	0	1	1	0	protein_coding
ENSG00000118985	ELL2	0	1.0909	0.585214	0	1	1	protein_coding
ENSG00000119782	FKBP1B	1.76319	0	0.716702	1	0	1	protein_coding
ENSG00000119899	SLC17A5	0.885372	0	0.750109	1	0	1	protein_coding
ENSG00000120129	DUSP1	0.648333	0.570733	0.380763	1	1	0	protein_coding
ENSG00000120306	CYSTM1	1.14928	0.313278	0.676701	1	0	1	protein_coding
ENSG00000120324	PCDHB10	0.716409	1.00937	0	1	1	0	protein_coding
ENSG00000120437	ACAT2	0.691297	0.356644	0.561233	1	0	1	protein_coding
ENSG00000120690	ELF1	-0.407981	0.722858	0.513703	0	1	1	protein_coding
ENSG00000120860	WASHC3	0.622816	0.557789	0	1	1	0	protein_coding
ENSG00000120899	PTK2B	1.37994	1.10393	0	1	1	0	protein_coding
ENSG00000122507	BBS9	0.67112	0.645392	0	1	1	0	protein_coding
ENSG00000122644	ARL4A	-0.400508	0.631653	0.8614	0	1	1	protein_coding
ENSG00000122694	GLIPR2	0.863553	0.709988	0	1	1	0	protein_coding
ENSG00000122861	PLAU	0.505597	1.1477	0	1	1	0	protein_coding
ENSG00000123095	BHLHE41	0	2.29338	1.6056	0	1	1	protein_coding
ENSG00000123191	ATP7B	0.566957	0.607114	0	1	1	0	protein_coding
ENSG00000123240	OPTN	0.987897	1.75325	0	1	1	0	protein_coding
ENSG00000123609	NMI	0	1.53899	0.947861	0	1	1	protein_coding
ENSG00000123700	KCNJ2	0.543059	0.686698	0	1	1	0	protein_coding
ENSG00000123989	CHPF	0.611367	-0.438867	0.858132	1	0	1	protein_coding
ENSG00000124208	TMEM189-UBE2V1	0.711752	0	5.5608	1	0	1	protein_coding
ENSG00000124313	IQSEC2	0.379065	0.864464	0.956853	0	1	1	protein_coding
ENSG00000124479	NDP	1.13547	1.13671	0	1	1	0	protein_coding
ENSG00000124731	TREM1	1.07535	5.73271	0	1	1	0	protein_coding
ENSG00000125505	MBOAT7	0.461311	0.730977	1.05965	0	1	1	protein_coding
ENSG00000125814	NAPB	0	0.598513	0.651325	0	1	1	protein_coding
ENSG00000125868	DSTN	0.664902	0.727587	0	1	1	0	protein_coding
ENSG00000126247	CAPNS1	0.556543	0.630121	0.179071	1	1	0	protein_coding
ENSG00000126903	SLC10A3	0	0.927085	0.600776	0	1	1	protein_coding
ENSG00000127561	SYNGR3	2.19656	2.32865	0	1	1	0	protein_coding
ENSG00000127585	FBXL16	3.86555	0	0.571638	1	0	1	protein_coding
ENSG00000127863	TNFRSF19	0	1.50044	0.648163	0	1	1	protein_coding
ENSG00000127951	FGL2	1.94048	3.40337	0	1	1	0	protein_coding
ENSG00000127955	GNAI1	0.818206	0.614365	0	1	1	0	protein_coding
ENSG00000128274	A4GALT	1.83237	0.650122	0	1	1	0	protein_coding
ENSG00000128285	MCHR1	0.481072	2.26623	0.554294	0	1	1	protein_coding
ENSG00000128512	DOCK4	0.821331	0.290042	0.553213	1	0	1	protein_coding
ENSG00000128564	VGF	1.90381	0	0.650381	1	0	1	protein_coding
ENSG00000128567	PODXL	0.229185	0.640289	0.735131	0	1	1	protein_coding
ENSG00000128590	DNAJB9	0.37606	0.556743	0.605929	0	1	1	protein_coding
ENSG00000128594	LRRC4	0	0.772998	0.549738	0	1	1	protein_coding
ENSG00000129422	MTUS1	0.586478	1.29136	-0.205982	1	1	0	protein_coding
ENSG00000129521	EGLN3	1.10988	1.73194	0	1	1	0	protein_coding
ENSG00000129625	REEP5	0.95909	0.388609	0.608624	1	0	1	protein_coding
ENSG00000129667	RHBDF2	0	1.83559	0.797256	0	1	1	protein_coding
ENSG00000130021	PUDP	1.32774	1.15629	0	1	1	0	protein_coding
ENSG00000130147	SH3BP4	0.226363	0.691506	0.730976	0	1	1	protein_coding
ENSG00000130294	KIF1A	1.23908	0.71094	0.298667	1	1	0	protein_coding
ENSG00000130477	UNC13A	0.686053	0.321054	0.57793	1	0	1	protein_coding
ENSG00000130589	HELZ2	0.250616	0.707862	0.526189	0	1	1	protein_coding
ENSG00000131018	SYNE1	0.550788	1.26886	0	1	1	0	protein_coding
ENSG00000131069	ACSS2	0	0.766994	0.581407	0	1	1	protein_coding
ENSG00000131386	GALNT15	2.51419	2.40445	0	1	1	0	protein_coding
ENSG00000131408	NR1H2	0.536602	0	0.648676	1	0	1	protein_coding
ENSG00000131409	LRRC4B	1.19755	0	1.33826	1	0	1	protein_coding
ENSG00000131650	KREMEN2	1.17572	0	0.864488	1	0	1	protein_coding
ENSG00000131711	MAP1B	1.23085	0.969322	0.412486	1	1	0	protein_coding
ENSG00000131773	KHDRBS3	1.39162	2.04929	0	1	1	0	protein_coding
ENSG00000132196	HSD17B7	0.389426	0.596234	1.24894	0	1	1	protein_coding
ENSG00000132205	EMILIN2	1.7332	1.32388	0.439897	1	1	0	protein_coding
ENSG00000132535	DLG4	0.566845	0	1.06066	1	0	1	protein_coding
ENSG00000132622	HSPA12B	1.61129	1.73364	0	1	1	0	protein_coding
ENSG00000132825	PPP1R3D	0	0.708626	0.807076	0	1	1	protein_coding
ENSG00000133069	TMCC2	0.871677	0	0.802977	1	0	1	protein_coding
ENSG00000133083	DCLK1	0.599022	1.85785	0.27676	1	1	0	protein_coding
ENSG00000133121	STARD13	1.7656	0.562362	0.331775	1	1	0	protein_coding
ENSG00000133169	BEX1	1.08718	1.64605	0	1	1	0	protein_coding
ENSG00000133703	KRAS	0.520788	0.525156	0.225386	1	1	0	protein_coding
ENSG00000134326	CMPK2	0	1.46488	0.757148	0	1	1	protein_coding
ENSG00000134352	IL6ST	0.542427	0.503888	0.425049	1	1	0	protein_coding
ENSG00000134444	RELCH	0.560656	0.660908	0	1	1	0	protein_coding
ENSG00000134490	TMEM241	0.860154	0	0.5396	1	0	1	protein_coding
ENSG00000134769	DTNA	0	1.14664	1.7826	0	1	1	protein_coding
ENSG00000134852	CLOCK	0.201133	0.677226	0.849013	0	1	1	protein_coding
ENSG00000135046	ANXA1	1.26717	1.19396	0	1	1	0	protein_coding
ENSG00000135048	CEMIP2	0.555624	2.20713	0.460907	1	1	0	protein_coding
ENSG00000135070	ISCA1	1.24923	0.724536	0.15976	1	1	0	protein_coding
ENSG00000135083	CCNJL	0.556534	0.524656	0	1	1	0	protein_coding
ENSG00000135116	HRK	1.37957	4.81783	0	1	1	0	protein_coding
ENSG00000135454	B4GALNT1	0.955	0.265786	0.634203	1	0	1	protein_coding
ENSG00000135502	SLC26A10	0	0.584939	0.762537	0	1	1	protein_coding
ENSG00000135622	SEMA4F	0.67346	1.33272	0	1	1	0	protein_coding
ENSG00000135709	KIAA0513	0.621245	0.378567	1.01069	1	0	1	protein_coding
ENSG00000135916	ITM2C	0.521252	0.85955	0	1	1	0	protein_coding
ENSG00000136048	DRAM1	0	0.631099	1.69804	0	1	1	protein_coding
ENSG00000136367	ZFHX2	0	1.25204	1.02876	0	1	1	protein_coding
ENSG00000136869	TLR4	0	3.58689	0.711101	0	1	1	protein_coding
ENSG00000137142	IGFBPL1	2.09193	1.28687	-0.342179	1	1	0	protein_coding
ENSG00000137193	PIM1	0.613668	0	0.637311	1	0	1	protein_coding
ENSG00000137267	TUBB2A	1.12587	0.666854	0.461855	1	1	0	protein_coding
ENSG00000137274	BPHL	1.52132	0.544127	0.260037	1	1	0	protein_coding
ENSG00000137449	CPEB2	0.372253	0.517519	1.03946	0	1	1	protein_coding
ENSG00000137764	MAP2K5	0.888954	1.19018	0.278763	1	1	0	protein_coding
ENSG00000137842	TMEM62	0.782667	0.530826	0.392514	1	1	0	protein_coding
ENSG00000137996	RTCA	0.612049	0.890317	0.457003	1	1	0	protein_coding
ENSG00000138030	KHK	0.877775	0	1.01086	1	0	1	protein_coding
ENSG00000138111	MFSD13A	0.660038	0.606384	0	1	1	0	protein_coding
ENSG00000138119	MYOF	1.10531	1.19457	0	1	1	0	protein_coding
ENSG00000138411	HECW2	0.737509	2.47863	0	1	1	0	protein_coding
ENSG00000138413	IDH1	0.572763	0	0.735154	1	0	1	protein_coding
ENSG00000138459	SLC35A5	1.11836	0.618226	0.266039	1	1	0	protein_coding
ENSG00000138642	HERC6	0.516457	1.96111	0	1	1	0	protein_coding
ENSG00000138660	AP1AR	0.660904	0.560144	0.31666	1	1	0	protein_coding
ENSG00000138685	FGF2	0.63143	0.185754	0.550155	1	0	1	protein_coding
ENSG00000138686	BBS7	0.653067	0.5436	0.452641	1	1	0	protein_coding
ENSG00000138798	EGF	1.35488	1.267	0	1	1	0	protein_coding
ENSG00000139641	ESYT1	0.499773	1.27024	0.6007	0	1	1	protein_coding
ENSG00000139719	VPS33A	0.549149	0.751557	0.175615	1	1	0	protein_coding
ENSG00000139971	ARMH4	0.964135	2.09293	0	1	1	0	protein_coding
ENSG00000140367	UBE2Q2	0	0.614221	0.690101	0	1	1	protein_coding
ENSG00000140479	PCSK6	1.11342	0.988711	0	1	1	0	protein_coding
ENSG00000140743	CDR2	0.852426	0.684762	0	1	1	0	protein_coding
ENSG00000140859	KIFC3	0.475614	1.55737	0.735628	0	1	1	protein_coding
ENSG00000141298	SSH2	0.31043	0.740696	0.67649	0	1	1	protein_coding
ENSG00000141480	ARRB2	0.581929	0	0.563425	1	0	1	protein_coding
ENSG00000141542	RAB40B	0.665207	0.581219	0.449603	1	1	0	protein_coding
ENSG00000142330	CAPN10	0.409091	0.648965	0.532015	0	1	1	protein_coding
ENSG00000142408	CACNG8	1.36895	0	0.956725	1	0	1	protein_coding
ENSG00000143067	ZNF697	1.28938	0.965649	0	1	1	0	protein_coding
ENSG00000143162	CREG1	0.514181	0.636268	0.309457	1	1	0	protein_coding
ENSG00000143195	ILDR2	1.19877	1.06117	0	1	1	0	protein_coding
ENSG00000143318	CASQ1	1.09139	2.08276	0	1	1	0	protein_coding
ENSG00000143630	HCN3	0.483198	0.586789	0.686974	0	1	1	protein_coding
ENSG00000143669	LYST	0.487558	0.519369	0.789211	0	1	1	protein_coding
ENSG00000143786	CNIH3	0.917266	1.55382	0	1	1	0	protein_coding
ENSG00000143816	WNT9A	1.07951	2.07241	0	1	1	0	protein_coding
ENSG00000143862	ARL8A	0.674412	0.191179	0.504164	1	0	1	protein_coding
ENSG00000144583	43894	0	1.62085	0.991898	0	1	1	protein_coding
ENSG00000144834	TAGLN3	1.22096	0	1.2052	1	0	1	protein_coding
ENSG00000144959	NCEH1	0	0.526033	0.895878	0	1	1	protein_coding
ENSG00000145012	LPP	0.656009	1.16247	0.499101	1	1	0	protein_coding
ENSG00000145016	RUBCN	1.28307	0.803062	0.442495	1	1	0	protein_coding
ENSG00000145022	TCTA	0.785582	1.11836	0.301105	1	1	0	protein_coding
ENSG00000145390	USP53	0	2.20715	0.891242	0	1	1	protein_coding
ENSG00000145545	SRD5A1	0.807883	1.17446	0.236167	1	1	0	protein_coding
ENSG00000145730	PAM	0.998783	1.03626	0	1	1	0	protein_coding
ENSG00000145860	RNF145	0.748221	0.916321	0.372018	1	1	0	protein_coding
ENSG00000145861	C1QTNF2	1.43397	1.98671	0	1	1	0	protein_coding
ENSG00000145882	PCYOX1L	1.07623	0.789223	0.274886	1	1	0	protein_coding
ENSG00000146242	TPBG	0	1.07318	1.24978	0	1	1	protein_coding
ENSG00000146592	CREB5	0	0.996467	0.647668	0	1	1	protein_coding
ENSG00000147010	SH3KBP1	0.535634	0.725629	0	1	1	0	protein_coding
ENSG00000147041	SYTL5	0.592862	2.53427	0	1	1	0	protein_coding
ENSG00000147082	CCNB3	0.92414	0.567885	0	1	1	0	protein_coding
ENSG00000147231	CXorf57	0.636546	0.819975	0	1	1	0	protein_coding
ENSG00000147324	MFHAS1	0	0.85618	0.517284	0	1	1	protein_coding
ENSG00000147416	ATP6V1B2	0.712426	1.11456	0.151418	1	1	0	protein_coding
ENSG00000147457	CHMP7	0.52015	0.569486	0.143408	1	1	0	protein_coding
ENSG00000147883	CDKN2B	0	2.41238	0.652956	0	1	1	protein_coding
ENSG00000148082	SHC3	0.54058	0.674932	0	1	1	0	protein_coding
ENSG00000148408	CACNA1B	0	1.30896	1.47303	0	1	1	protein_coding
ENSG00000148541	FAM13C	1.06934	1.95204	0	1	1	0	protein_coding
ENSG00000149089	APIP	0.81755	0	0.53728	1	0	1	protein_coding
ENSG00000149177	PTPRJ	0.897848	1.71947	0	1	1	0	protein_coding
ENSG00000149927	DOC2A	0.950718	0	0.687814	1	0	1	protein_coding
ENSG00000150764	DIXDC1	1.40333	0.802926	0.176782	1	1	0	protein_coding
ENSG00000150961	SEC24D	1.14164	0.953277	0.269752	1	1	0	protein_coding
ENSG00000151117	TMEM86A	0.677942	0.857439	0	1	1	0	protein_coding
ENSG00000151150	ANK3	0	2.59606	0.917558	0	1	1	protein_coding
ENSG00000151176	PLBD2	0.729261	0.735602	0.477465	1	1	0	protein_coding
ENSG00000151229	SLC2A13	0.770116	0	0.564918	1	0	1	protein_coding
ENSG00000151743	AMN1	0.98685	0	0.695675	1	0	1	protein_coding
ENSG00000151778	SERP2	0	1.25052	0.661778	0	1	1	protein_coding
ENSG00000152127	MGAT5	0.884742	0.872483	0	1	1	0	protein_coding
ENSG00000152137	HSPB8	0	2.32507	1.5909	0	1	1	protein_coding
ENSG00000152749	GPR180	0.686628	0	0.651945	1	0	1	protein_coding
ENSG00000152894	PTPRK	0.748326	0.678831	-0.199817	1	1	0	protein_coding
ENSG00000153253	SCN3A	4.84699	1.69358	0	1	1	0	protein_coding
ENSG00000153790	C7orf31	0.68512	1.07728	0	1	1	0	protein_coding
ENSG00000154229	PRKCA	0.704526	0.511385	0.434833	1	1	0	protein_coding
ENSG00000154277	UCHL1	0.851511	0.671677	0.330245	1	1	0	protein_coding
ENSG00000154328	NEIL2	0.694392	0.167308	0.944428	1	0	1	protein_coding
ENSG00000154545	MAGED4	1.09818	0.894494	0	1	1	0	protein_coding
ENSG00000154556	SORBS2	1.37669	1.21327	0.412275	1	1	0	protein_coding
ENSG00000155016	CYP2U1	0.628276	0.554365	0	1	1	0	protein_coding
ENSG00000155366	RHOC	0.359744	0.938717	0.529819	0	1	1	protein_coding
ENSG00000155760	FZD7	0	0.504638	0.726378	0	1	1	protein_coding
ENSG00000155961	RAB39B	0.88955	0.764573	0.383672	1	1	0	protein_coding
ENSG00000156050	FAM161B	0	0.868869	0.586668	0	1	1	protein_coding
ENSG00000156052	GNAQ	0.948283	0.527026	0.484846	1	1	0	protein_coding
ENSG00000156103	MMP16	0.875626	0.450439	0.510543	1	0	1	protein_coding
ENSG00000156265	MAP3K7CL	0.660292	2.73057	0	1	1	0	protein_coding
ENSG00000156475	PPP2R2B	0.578806	0.597345	0	1	1	0	protein_coding
ENSG00000156675	RAB11FIP1	0.710851	0.785994	0	1	1	0	protein_coding
ENSG00000157064	NMNAT2	1.34084	2.578	0.145757	1	1	0	protein_coding
ENSG00000157087	ATP2B2	0.598661	0.533279	0	1	1	0	protein_coding
ENSG00000157193	LRP8	0.516017	-0.460306	0.894205	1	0	1	protein_coding
ENSG00000157514	TSC22D3	0.90267	1.34747	0	1	1	0	protein_coding
ENSG00000158023	WDR66	0	1.07919	0.756886	0	1	1	protein_coding
ENSG00000158079	PTPDC1	1.00643	1.02274	0.235502	1	1	0	protein_coding
ENSG00000158290	CUL4B	0.530466	0.672012	0.256782	1	1	0	protein_coding
ENSG00000158406	HIST1H4H	0.679516	1.15448	0	1	1	0	protein_coding
ENSG00000158445	KCNB1	0.524682	0	0.511711	1	0	1	protein_coding
ENSG00000158480	SPATA2	0.365275	0.827391	0.805172	0	1	1	protein_coding
ENSG00000158483	FAM86C1	0.811656	0.660379	0.294138	1	1	0	protein_coding
ENSG00000158710	TAGLN2	0.51401	0.640932	0.167598	1	1	0	protein_coding
ENSG00000158711	ELK4	0	0.55131	0.961068	0	1	1	protein_coding
ENSG00000158966	CACHD1	0.781391	0.573336	0	1	1	0	protein_coding
ENSG00000159167	STC1	-0.293986	4.01124	0.967915	0	1	1	protein_coding
ENSG00000160282	FTCD	0	1.89593	1.61158	0	1	1	protein_coding
ENSG00000160285	LSS	0.463593	1.25632	0.865807	0	1	1	protein_coding
ENSG00000160446	ZDHHC12	0.573345	0.876143	0	1	1	0	protein_coding
ENSG00000160877	NACC1	2.0429	-0.180445	0.698851	1	0	1	protein_coding
ENSG00000161671	EMC10	0.541941	0.733724	0	1	1	0	protein_coding
ENSG00000161914	ZNF653	0	0.544245	0.69059	0	1	1	protein_coding
ENSG00000162636	FAM102B	1.65517	0.62653	0.421574	1	1	0	protein_coding
ENSG00000162946	DISC1	0.667963	0.82647	0	1	1	0	protein_coding
ENSG00000162975	KCNF1	0.836787	0	1.09017	1	0	1	protein_coding
ENSG00000163412	EIF4E3	0	0.608339	1.04071	0	1	1	protein_coding
ENSG00000163513	TGFBR2	0	1.1828	1.8442	0	1	1	protein_coding
ENSG00000163531	NFASC	0.639682	1.35178	0	1	1	0	protein_coding
ENSG00000163637	PRICKLE2	0.786201	0.624651	0	1	1	0	protein_coding
ENSG00000163661	PTX3	1.49203	1.2954	0	1	1	0	protein_coding
ENSG00000163888	CAMK2N2	0.414856	1.24181	0.61653	0	1	1	protein_coding
ENSG00000163898	LIPH	1.68971	5.21013	0	1	1	0	protein_coding
ENSG00000163947	ARHGEF3	0.396517	0.561959	0.728254	0	1	1	protein_coding
ENSG00000163959	SLC51A	0	1.3103	0.949678	0	1	1	protein_coding
ENSG00000164114	MAP9	0.581312	0.681366	0.312099	1	1	0	protein_coding
ENSG00000164171	ITGA2	0.520649	2.40781	0	1	1	0	protein_coding
ENSG00000164199	ADGRV1	0.760996	1.10671	0	1	1	0	protein_coding
ENSG00000164221	CCDC112	0.658072	0.56205	0.45642	1	1	0	protein_coding
ENSG00000164251	F2RL1	2.62551	1.51842	0	1	1	0	protein_coding
ENSG00000164253	WDR41	1.10543	0.532936	0.157191	1	1	0	protein_coding
ENSG00000164506	STXBP5	0.793255	0.766686	0	1	1	0	protein_coding
ENSG00000164659	KIAA1324L	0.523416	0.710372	0	1	1	0	protein_coding
ENSG00000164933	SLC25A32	0.753961	0	0.587802	1	0	1	protein_coding
ENSG00000164949	GEM	0.936104	1.22225	0.48293	1	1	0	protein_coding
ENSG00000164989	CCDC171	0	0.887151	0.889803	0	1	1	protein_coding
ENSG00000165046	LETM2	0.917482	0.854704	0	1	1	0	protein_coding
ENSG00000165071	TMEM71	1.84695	4.95512	0	1	1	0	protein_coding
ENSG00000165312	OTUD1	1.77225	0.569123	0	1	1	0	protein_coding
ENSG00000165661	QSOX2	0.519362	-0.255721	0.569866	1	0	1	protein_coding
ENSG00000165802	NSMF	1.07958	0.349781	0.509235	1	0	1	protein_coding
ENSG00000165806	CASP7	0.96709	1.34348	0	1	1	0	protein_coding
ENSG00000165813	CCDC186	0.990961	1.25735	0.323169	1	1	0	protein_coding
ENSG00000165995	CACNB2	1.09235	0.582305	0	1	1	0	protein_coding
ENSG00000166016	ABTB2	1.09882	1.39783	0	1	1	0	protein_coding
ENSG00000166292	TMEM100	0.643104	1.04212	0	1	1	0	protein_coding
ENSG00000166311	SMPD1	0.522649	1.02636	0	1	1	0	protein_coding
ENSG00000166444	ST5	0.771373	0.630972	0	1	1	0	protein_coding
ENSG00000166548	TK2	0.356106	0.583109	0.668967	0	1	1	protein_coding
ENSG00000166579	NDEL1	0.416873	0.746642	0.655834	0	1	1	protein_coding
ENSG00000166997	CNPY4	0.648721	0.634777	0	1	1	0	protein_coding
ENSG00000167123	CERCAM	0.524908	0.536339	0	1	1	0	protein_coding
ENSG00000167232	ZNF91	0.651668	0.456327	0.703272	1	0	1	protein_coding
ENSG00000167306	MYO5B	0.224629	1.60248	1.14956	0	1	1	protein_coding
ENSG00000167378	IRGQ	0.839429	1.13128	0.265476	1	1	0	protein_coding
ENSG00000167508	MVD	0.797422	0.27556	1.03343	1	0	1	protein_coding
ENSG00000167578	RAB4B	0.698334	0	1.13729	1	0	1	protein_coding
ENSG00000167767	KRT80	0.887471	5.1348	0	1	1	0	protein_coding
ENSG00000168016	TRANK1	0	2.74411	0.522545	0	1	1	protein_coding
ENSG00000168675	LDLRAD4	1.19723	2.85053	-0.490278	1	1	0	protein_coding
ENSG00000168758	SEMA4C	0.367672	0.857138	0.502049	0	1	1	protein_coding
ENSG00000168772	CXXC4	0	1.11152	0.539087	0	1	1	protein_coding
ENSG00000169019	COMMD8	0.566746	0	0.87613	1	0	1	protein_coding
ENSG00000169085	VXN	1.14698	0.6876	0	1	1	0	protein_coding
ENSG00000169116	PARM1	1.93594	2.21274	0.303565	1	1	0	protein_coding
ENSG00000169118	CSNK1G1	0.525059	0.524874	0.385798	1	1	0	protein_coding
ENSG00000169213	RAB3B	1.58223	0.94939	0	1	1	0	protein_coding
ENSG00000169241	SLC50A1	0.684429	0	0.600038	1	0	1	protein_coding
ENSG00000169570	DTWD2	2.44355	1.3168	0	1	1	0	protein_coding
ENSG00000169744	LDB2	1.95697	1.57616	0	1	1	0	protein_coding
ENSG00000169851	PCDH7	0	0.504277	0.963586	0	1	1	protein_coding
ENSG00000170043	TRAPPC1	1.27433	0.627395	0	1	1	0	protein_coding
ENSG00000170340	B3GNT2	1.19374	1.58373	0	1	1	0	protein_coding
ENSG00000170485	NPAS2	1.02438	1.47505	0	1	1	0	protein_coding
ENSG00000170545	SMAGP	0	0.643734	0.525112	0	1	1	protein_coding
ENSG00000170653	ATF7	0.617853	0.868794	0.408997	1	1	0	protein_coding
ENSG00000170776	AKAP13	0.632478	1.12045	0.125941	1	1	0	protein_coding
ENSG00000171094	ALK	1.02488	1.06469	0.402972	1	1	0	protein_coding
ENSG00000171132	PRKCE	0.791019	1.55816	0.36847	1	1	0	protein_coding
ENSG00000171307	ZDHHC16	0.519077	0.619299	0	1	1	0	protein_coding
ENSG00000171365	CLCN5	1.41683	1.66887	-0.29591	1	1	0	protein_coding
ENSG00000171368	TPPP	0.694349	1.1884	0.405969	1	1	0	protein_coding
ENSG00000171617	ENC1	0.417683	0.836888	0.608558	0	1	1	protein_coding
ENSG00000171860	C3AR1	0	7.06459	3.0849	0	1	1	protein_coding
ENSG00000171885	AQP4	1.89066	1.78796	0	1	1	0	protein_coding
ENSG00000171928	TVP23B	0.57673	0	0.670029	1	0	1	protein_coding
ENSG00000171951	SCG2	1.55375	1.8337	0.135051	1	1	0	protein_coding
ENSG00000171992	SYNPO	0.998451	0.992547	-0.170109	1	1	0	protein_coding
ENSG00000172020	GAP43	1.47135	1.12174	0.356811	1	1	0	protein_coding
ENSG00000172071	EIF2AK3	0.728618	1.09295	0.229123	1	1	0	protein_coding
ENSG00000172164	SNTB1	0.928202	1.97324	0	1	1	0	protein_coding
ENSG00000172375	C2CD2L	0.575752	0.323855	0.751212	1	0	1	protein_coding
ENSG00000172893	DHCR7	0.265375	2.079	0.884671	0	1	1	protein_coding
ENSG00000172985	SH3RF3	0.62838	1.12467	0	1	1	0	protein_coding
ENSG00000173166	RAPH1	0.992919	1.09263	0	1	1	0	protein_coding
ENSG00000173744	AGFG1	0.559141	0.503067	0.193285	1	1	0	protein_coding
ENSG00000173805	HAP1	1.92898	0.336704	1.50441	1	0	1	protein_coding
ENSG00000173928	SWSAP1	0	1.28715	0.703539	0	1	1	protein_coding
ENSG00000174010	KLHL15	0.370985	0.682283	0.728783	0	1	1	protein_coding
ENSG00000174151	CYB561D1	0.887268	0.800697	0.429679	1	1	0	protein_coding
ENSG00000174842	GLMN	0.542658	0.535302	0	1	1	0	protein_coding
ENSG00000175040	CHST2	0.502926	0.792317	0	1	1	0	protein_coding
ENSG00000175048	ZDHHC14	0.535035	0.666536	0	1	1	0	protein_coding
ENSG00000175471	MCTP1	1.8557	3.37803	0	1	1	0	protein_coding
ENSG00000175701	MTLN	0.713333	-0.469624	0.646685	1	0	1	protein_coding
ENSG00000175711	B3GNTL1	0.532015	0.618143	0	1	1	0	protein_coding
ENSG00000175806	MSRA	0.593978	0.527505	0	1	1	0	protein_coding
ENSG00000175866	BAIAP2	0.748641	0.775059	0.391754	1	1	0	protein_coding
ENSG00000176182	MYPOP	0.668913	0	0.674246	1	0	1	protein_coding
ENSG00000176597	B3GNT5	0.809446	1.79364	0	1	1	0	protein_coding
ENSG00000177628	GBA	0.699847	0.848164	0	1	1	0	protein_coding
ENSG00000178053	MLF1	0.667964	0	1.02683	1	0	1	protein_coding
ENSG00000178381	ZFAND2A	0.518979	0	0.749018	1	0	1	protein_coding
ENSG00000178585	CTNNBIP1	0	0.891306	0.822548	0	1	1	protein_coding
ENSG00000178662	CSRNP3	0	1.45523	0.857482	0	1	1	protein_coding
ENSG00000178878	APOLD1	2.21409	0.606366	0	1	1	0	protein_coding
ENSG00000179094	PER1	0	0.505247	0.553808	0	1	1	protein_coding
ENSG00000179168	GGN	0	1.10494	1.72967	0	1	1	protein_coding
ENSG00000179431	FJX1	0.674507	0	0.658335	1	0	1	protein_coding
ENSG00000179820	MYADM	0.756094	1.68754	0.189978	1	1	0	protein_coding
ENSG00000180287	PLD5	0.382972	1.99228	0.572137	0	1	1	protein_coding
ENSG00000180776	ZDHHC20	0.602969	0.404502	0.524498	1	0	1	protein_coding
ENSG00000180998	GPR137C	0	1.84064	0.615079	0	1	1	protein_coding
ENSG00000181381	DDX60L	0.51658	2.62434	0	1	1	0	protein_coding
ENSG00000181513	ACBD4	0.532248	0	0.685886	1	0	1	protein_coding
ENSG00000182158	CREB3L2	0.524898	0.536939	-0.210156	1	1	0	protein_coding
ENSG00000182168	UNC5C	2.15247	0.929162	-0.231761	1	1	0	protein_coding
ENSG00000182197	EXT1	0.692134	0.724914	0.203431	1	1	0	protein_coding
ENSG00000182372	CLN8	0	0.557668	0.758764	0	1	1	protein_coding
ENSG00000182400	TRAPPC6B	0.547129	0.741407	0.224431	1	1	0	protein_coding
ENSG00000183044	ABAT	0.889204	0.77711	0.351395	1	1	0	protein_coding
ENSG00000183049	CAMK1D	0.537736	0.510577	0	1	1	0	protein_coding
ENSG00000183779	ZNF703	0	0.65348	0.952508	0	1	1	protein_coding
ENSG00000183826	BTBD9	0.755781	1.13304	0.307913	1	1	0	protein_coding
ENSG00000183828	NUDT14	0.657505	2.74954	0	1	1	0	protein_coding
ENSG00000183833	MAATS1	0.582051	0.620681	0	1	1	0	protein_coding
ENSG00000184349	EFNA5	0.771403	1.02529	0.3693	1	1	0	protein_coding
ENSG00000184584	TMEM173	0.536227	1.25182	0	1	1	0	protein_coding
ENSG00000184828	ZBTB7C	0.733598	1.90757	0	1	1	0	protein_coding
ENSG00000185015	CA13	1.07933	1.79053	0	1	1	0	protein_coding
ENSG00000185033	SEMA4B	0	1.03675	0.52062	0	1	1	protein_coding
ENSG00000185361	TNFAIP8L1	1.22158	0.473756	0.794306	1	0	1	protein_coding
ENSG00000185418	TARSL2	0.883511	0.73066	0.395308	1	1	0	protein_coding
ENSG00000185420	SMYD3	0.957892	0	0.603656	1	0	1	protein_coding
ENSG00000185567	AHNAK2	0	2.53199	0.505737	0	1	1	protein_coding
ENSG00000185634	SHC4	0.919426	1.77294	0	1	1	0	protein_coding
ENSG00000185813	PCYT2	0.883989	0.800423	0.496355	1	1	0	protein_coding
ENSG00000186469	GNG2	0.807137	0.919325	0.345463	1	1	0	protein_coding
ENSG00000186470	BTN3A2	0.616124	0	0.796197	1	0	1	protein_coding
ENSG00000186523	FAM86B1	0.727866	0.781395	0	1	1	0	protein_coding
ENSG00000186868	MAPT	0.838628	-0.250557	0.503037	1	0	1	protein_coding
ENSG00000186889	TMEM17	0.898679	0.922843	0	1	1	0	protein_coding
ENSG00000187068	C3orf70	0.706507	0.864671	0	1	1	0	protein_coding
ENSG00000187867	PALM3	3.67385	2.19427	0	1	1	0	protein_coding
ENSG00000189221	MAOA	1.17082	0	1.04203	1	0	1	protein_coding
ENSG00000189337	KAZN	1.43798	0.804613	0	1	1	0	protein_coding
ENSG00000189367	KIAA0408	0.564419	0.697716	0.187472	1	1	0	protein_coding
ENSG00000189369	GSPT2	0.684778	0.688667	0	1	1	0	protein_coding
ENSG00000189410	SH2D5	1.43326	0	1.01651	1	0	1	protein_coding
ENSG00000196083	IL1RAP	1.14629	2.51315	0	1	1	0	protein_coding
ENSG00000196227	FAM217B	0.826847	0.834371	0.248374	1	1	0	protein_coding
ENSG00000196361	ELAVL3	3.58034	0.924802	0.189372	1	1	0	protein_coding
ENSG00000196368	NUDT11	0.783585	0.232958	0.814467	1	0	1	protein_coding
ENSG00000196378	ZNF34	0.671613	0.676797	0	1	1	0	protein_coding
ENSG00000196693	ZNF33B	0.516765	1.69228	0.192269	1	1	0	protein_coding
ENSG00000196867	ZFP28	0.655422	0.666206	0.343483	1	1	0	protein_coding
ENSG00000197217	ENTPD4	1.15335	0.833302	0.239478	1	1	0	protein_coding
ENSG00000197329	PELI1	0.657984	0.578448	0.262872	1	1	0	protein_coding
ENSG00000197442	MAP3K5	0.780614	1.02238	0	1	1	0	protein_coding
ENSG00000197555	SIPA1L1	0.411973	0.543347	0.512149	0	1	1	protein_coding
ENSG00000197594	ENPP1	1.07965	1.39655	0	1	1	0	protein_coding
ENSG00000197712	FAM114A1	1.40508	0.878326	0	1	1	0	protein_coding
ENSG00000197959	DNM3	1.41677	0.929518	0	1	1	0	protein_coding
ENSG00000197965	MPZL1	0.638825	0.527921	0.280762	1	1	0	protein_coding
ENSG00000198121	LPAR1	0	0.83297	0.787501	0	1	1	protein_coding
ENSG00000198169	ZNF251	0.515045	0.690572	0	1	1	0	protein_coding
ENSG00000198513	ATL1	0.867455	1.71773	0	1	1	0	protein_coding
ENSG00000198689	SLC9A6	0.600788	0.881714	0.343824	1	1	0	protein_coding
ENSG00000198722	UNC13B	0.706545	0.55324	0	1	1	0	protein_coding
ENSG00000198729	PPP1R14C	0.761619	0.953544	0	1	1	0	protein_coding
ENSG00000198825	INPP5F	0.45534	0.612297	0.709922	0	1	1	protein_coding
ENSG00000198910	L1CAM	2.26774	0.793783	0	1	1	0	protein_coding
ENSG00000203879	GDI1	0.664708	0.207124	0.569669	1	0	1	protein_coding
ENSG00000204131	NHSL2	0.985998	1.5903	0.249654	1	1	0	protein_coding
ENSG00000204160	ZDHHC18	0.838872	0.799637	0.255061	1	1	0	protein_coding
ENSG00000204262	COL5A2	1.31986	1.78782	0	1	1	0	protein_coding
ENSG00000204291	COL15A1	2.25662	0.808928	0	1	1	0	protein_coding
ENSG00000204301	NOTCH4	0.856155	1.41373	0	1	1	0	protein_coding
ENSG00000204673	AKT1S1	0.543704	0	0.520775	1	0	1	protein_coding
ENSG00000204815	TTC25	0.933126	0.805214	0	1	1	0	protein_coding
ENSG00000204856	FAM216A	0.818362	-0.283989	0.504814	1	0	1	protein_coding
ENSG00000204963	PCDHA7	1.19943	0.849996	0	1	1	0	protein_coding
ENSG00000204967	PCDHA4	1.21258	1.36742	0	1	1	0	protein_coding
ENSG00000205084	TMEM231	0.777669	0.300165	0.719161	1	0	1	protein_coding
ENSG00000205593	DENND6B	0.554629	1.4827	0	1	1	0	protein_coding
ENSG00000205726	ITSN1	0.539122	0.934894	0.251057	1	1	0	protein_coding
ENSG00000206077	ZDHHC11B	0	0.811085	0.692457	0	1	1	protein_coding
ENSG00000213281	NRAS	1.60124	0.626606	0.11039	1	1	0	protein_coding
ENSG00000213762	ZNF134	0.567311	0.528962	0.335943	1	1	0	protein_coding
ENSG00000214447	FAM187A	1.0128	1.10441	0	1	1	0	protein_coding
ENSG00000216937	CCDC7	0	0.76111	1.06262	0	1	1	protein_coding
ENSG00000221988	PPT2	0.605256	0.82826	0.243031	1	1	0	protein_coding
ENSG00000225663	MCRIP1	0.484471	0.548133	0.50196	0	1	1	protein_coding
ENSG00000228672	PROB1	1.0688	0	0.757339	1	0	1	protein_coding
ENSG00000233024	AC126755.2	0	0.799686	0.964029	0	1	1	protein_coding
ENSG00000235106	BRD3OS	0.398817	0.534579	0.624378	0	1	1	protein_coding
ENSG00000237289	CKMT1B	1.04147	1.94385	0.348587	1	1	0	protein_coding
ENSG00000239282	CASTOR1	0.972744	1.60828	0	1	1	0	protein_coding
ENSG00000240694	PNMA2	0.864898	0.503234	0.391314	1	1	0	protein_coding
ENSG00000240891	PLCXD2	0	0.702383	1.06182	0	1	1	protein_coding
ENSG00000247315	ZCCHC3	0.990258	0.964572	0	1	1	0	protein_coding
ENSG00000253276	CCDC71L	0.658017	0.532331	0.212786	1	1	0	protein_coding
ENSG00000258947	TUBB3	0.777498	0.535014	0.256226	1	1	0	protein_coding
ENSG00000261884	AC040162.1	0	0.746334	0.596021	0	1	1	protein_coding
ENSG00000262576	PCDHGA4	0	0.733465	0.566211	0	1	1	protein_coding
ENSG00000263528	IKBKE	0.844914	1.28257	0	1	1	0	protein_coding
ENSG00000273003	ARL2-SNX15	0	0.657456	0.774919	0	1	1	protein_coding
ENSG00000276180	HIST1H4I	1.07112	0.901491	0	1	1	0	protein_coding
ENSG00000277531	PNMA8C	1.49263	0	1.33421	1	0	1	protein_coding
ENSG00000277586	NEFL	0	1.04088	0.585665	0	1	1	protein_coding
ENSG00000283228	AC068547.1	2.01422	0	0.591744	1	0	1	protein_coding
ENSG00000282164	PEG13	0.729072	3.80384	0	1	1	0	sense_intronic
ENSG00000273311	DGCR11	0.750388	0.610952	0	1	1	0	sense_intronic
ENSG00000260461	AL133355.1	0	0.923288	0.671107	0	1	1	sense_overlapping
ENSG00000280119	AC093642.2	0	1.63964	0.958155	0	1	1	TEC
ENSG00000280202	AC005831.1	1.29658	0.991142	0	1	1	0	TEC
ENSG00000279970	AC023024.2	0.936422	1.27111	0	1	1	0	TEC
ENSG00000279117	AP001972.5	0	0.748221	0.612016	0	1	1	TEC
ENSG00000280088	AC126474.2	0	0.546585	0.552245	0	1	1	TEC
ENSG00000229320	KRT8P12	0.739809	0.628937	0	1	1	0	transcribed_processed_pseudogene
ENSG00000088340	FER1L4	1.77802	0	2.06641	1	0	1	transcribed_unitary_pseudogene
ENSG00000203799	CCDC162P	0.673139	1.83061	0	1	1	0	transcribed_unitary_pseudogene
ENSG00000171084	FAM86JP	1.34448	1.13616	0.882261	1	1	1	transcribed_unprocessed_pseudogene
ENSG00000217801	AL390719.1	0.947508	3.26954	0	1	1	0	transcribed_unprocessed_pseudogene
ENSG00000253540	FAM86HP	0	1.5955	0.994995	0	1	1	transcribed_unprocessed_pseudogene
ENSG00000183604	SMG1P5	0	0.538092	1.03562	0	1	1	transcribed_unprocessed_pseudogene
ENSG00000196922	ZNF252P	0.69789	0.652885	0	1	1	0	transcribed_unprocessed_pseudogene
ENSG00000198416	ZNF658B	1.02099	1.0719	0	1	1	0	transcribed_unprocessed_pseudogene
ENSG00000226287	TMEM191A	1.96581	3.6381	0	1	1	0	transcribed_unprocessed_pseudogene
ENSG00000240024	LINC00888	0.53892	0.940577	0.366934	1	1	0	transcribed_unprocessed_pseudogene
ENSG00000275131	AC241952.1	0.926482	0.713442	0	1	1	0	transcribed_unprocessed_pseudogene
ENSG00000284620	AF228730.5	0.903674	1.88395	0	1	1	0	transcribed_unprocessed_pseudogene
ENSG00000216819	TUBB2BP1	0	1.56261	0.887006	0	1	1	unprocessed_pseudogene

## Sheet: lncRNAs
Ensembl ID	Gene Symbol	DOWN_1919	DOWN_3565	DOWN_BE2C	GENE_TYPE	miR-124	miR-128	miR-137
ENSG00000165406	43898	1	0	1	protein_coding	1	1	1
ENSG00000144452	ABCA12	1	0	1	protein_coding	0	1	0
ENSG00000011198	ABHD5	1	1	1	protein_coding	1	1	1
ENSG00000107796	ACTA2	1	1	0	protein_coding	0	1	0
ENSG00000168615	ADAM9	0	1	1	protein_coding	0	0	1
ENSG00000101544	ADNP2	1	1	1	protein_coding	1	0	0
ENSG00000160216	AGPAT3	1	1	1	protein_coding	0	1	1
ENSG00000168710	AHCYL1	1	1	1	protein_coding	0	0	1
ENSG00000186063	AIDA	1	1	0	protein_coding	1	0	0
ENSG00000126878	AIF1L	1	1	0	protein_coding	1	0	0
ENSG00000129474	AJUBA	1	1	0	protein_coding	0	0	1
ENSG00000004455	AK2	1	1	0	protein_coding	1	1	0
ENSG00000105221	AKT2	1	1	1	protein_coding	1	0	1
ENSG00000159423	ALDH4A1	1	1	1	protein_coding	0	1	0
ENSG00000119711	ALDH6A1	1	1	1	protein_coding	1	0	0
ENSG00000136859	ANGPTL2	0	1	1	protein_coding	0	0	1
ENSG00000100823	APEX1	1	1	1	protein_coding	0	1	0
ENSG00000138613	APH1B	0	1	1	protein_coding	1	0	0
ENSG00000134817	APLNR	0	1	1	protein_coding	0	1	0
ENSG00000136044	APPL2	1	1	1	protein_coding	0	0	1
ENSG00000165895	ARHGAP42	1	1	1	protein_coding	0	0	1
ENSG00000198363	ASPH	1	1	1	protein_coding	0	0	1
ENSG00000143970	ASXL2	1	1	0	protein_coding	1	0	1
ENSG00000184743	ATL3	1	1	1	protein_coding	1	1	0
ENSG00000086062	B4GALT1	1	1	1	protein_coding	1	0	0
ENSG00000112208	BAG2	1	1	0	protein_coding	0	1	1
ENSG00000198604	BAZ1A	0	1	1	protein_coding	0	0	1
ENSG00000085185	BCORL1	1	1	0	protein_coding	0	1	1
ENSG00000188848	BEND4	0	1	1	protein_coding	0	1	0
ENSG00000015475	BID	1	1	0	protein_coding	1	0	0
ENSG00000188428	BLOC1S5	1	1	1	protein_coding	0	1	0
ENSG00000104081	BMF	1	1	1	protein_coding	1	0	0
ENSG00000168283	BMI1	1	1	1	protein_coding	0	1	0
ENSG00000159388	BTG2	1	1	0	protein_coding	1	1	0
ENSG00000205208	C4orf46	1	1	1	protein_coding	1	0	0
ENSG00000204439	C6orf47	1	1	0	protein_coding	0	0	1
ENSG00000149679	CABLES2	1	1	1	protein_coding	0	1	1
ENSG00000160325	CACFD1	1	0	1	protein_coding	1	0	0
ENSG00000160014	CALM3	1	1	1	protein_coding	0	0	1
ENSG00000108349	CASC3	0	1	1	protein_coding	1	1	0
ENSG00000067955	CBFB	1	1	0	protein_coding	1	1	0
ENSG00000205476	CCDC85C	1	0	1	protein_coding	0	1	1
ENSG00000118816	CCNI	1	1	0	protein_coding	0	0	1
ENSG00000198087	CD2AP	1	1	1	protein_coding	0	1	1
ENSG00000112149	CD83	1	1	1	protein_coding	0	0	1
ENSG00000070831	CDC42	1	1	1	protein_coding	0	0	1
ENSG00000164649	CDCA7L	1	1	1	protein_coding	0	0	1
ENSG00000140937	CDH11	0	1	1	protein_coding	0	1	1
ENSG00000139880	CDH24	1	1	1	protein_coding	0	1	0
ENSG00000100422	CERK	1	1	1	protein_coding	0	0	1
ENSG00000013297	CLDN11	0	1	1	protein_coding	0	0	1
ENSG00000125656	CLPP	1	1	1	protein_coding	0	1	0
ENSG00000092853	CLSPN	1	1	0	protein_coding	0	0	1
ENSG00000064666	CNN2	1	1	0	protein_coding	0	0	1
ENSG00000113300	CNOT6	1	1	1	protein_coding	0	1	0
ENSG00000110880	CORO1C	1	1	0	protein_coding	0	1	0
ENSG00000131174	COX7B	1	1	1	protein_coding	0	1	1
ENSG00000168993	CPLX1	0	1	1	protein_coding	0	0	1
ENSG00000110090	CPT1A	0	1	1	protein_coding	1	0	0
ENSG00000099942	CRKL	1	1	1	protein_coding	1	1	1
ENSG00000175215	CTDSP2	1	1	1	protein_coding	1	1	1
ENSG00000144677	CTDSPL	1	1	0	protein_coding	1	1	1
ENSG00000174080	CTSF	1	1	1	protein_coding	0	0	1
ENSG00000154639	CXADR	1	0	1	protein_coding	1	1	1
ENSG00000107562	CXCL12	0	1	1	protein_coding	0	0	1
ENSG00000065615	CYB5R4	1	1	1	protein_coding	0	0	1
ENSG00000183283	DAZAP2	1	0	1	protein_coding	0	1	0
ENSG00000113758	DBN1	1	0	1	protein_coding	0	0	1
ENSG00000136485	DCAF7	0	1	1	protein_coding	1	1	0
ENSG00000172795	DCP2	0	1	1	protein_coding	0	1	0
ENSG00000153904	DDAH1	0	1	1	protein_coding	0	1	0
ENSG00000035499	DEPDC1B	1	1	1	protein_coding	0	1	0
ENSG00000108406	DHX40	1	1	1	protein_coding	0	0	1
ENSG00000176490	DIRAS1	1	1	1	protein_coding	0	1	1
ENSG00000119661	DNAL1	0	1	1	protein_coding	0	0	1
ENSG00000205683	DPF3	0	1	1	protein_coding	0	0	1
ENSG00000156162	DPY19L4	1	1	1	protein_coding	1	0	0
ENSG00000117505	DR1	1	1	0	protein_coding	0	0	1
ENSG00000143476	DTL	1	1	1	protein_coding	0	0	1
ENSG00000120875	DUSP4	1	1	1	protein_coding	0	0	1
ENSG00000138166	DUSP5	1	1	0	protein_coding	0	1	1
ENSG00000004975	DVL2	1	1	1	protein_coding	0	1	1
ENSG00000127334	DYRK2	1	1	0	protein_coding	1	0	0
ENSG00000112242	E2F3	1	1	0	protein_coding	1	1	0
ENSG00000165891	E2F7	1	0	1	protein_coding	0	1	1
ENSG00000117298	ECE1	1	1	1	protein_coding	1	1	0
ENSG00000172638	EFEMP2	0	1	1	protein_coding	0	0	1
ENSG00000099617	EFNA2	1	1	0	protein_coding	0	1	1
ENSG00000132294	EFR3A	1	1	1	protein_coding	0	1	1
ENSG00000146648	EGFR	1	1	1	protein_coding	0	1	1
ENSG00000120738	EGR1	1	1	0	protein_coding	1	0	0
ENSG00000173442	EHBP1L1	1	1	0	protein_coding	0	0	1
ENSG00000130741	EIF2S3	1	1	0	protein_coding	0	0	1
ENSG00000179387	ELMOD2	1	0	1	protein_coding	0	0	1
ENSG00000066322	ELOVL1	1	1	1	protein_coding	0	0	1
ENSG00000163064	EN1	1	1	0	protein_coding	0	1	0
ENSG00000159023	EPB41	1	1	0	protein_coding	0	1	0
ENSG00000171320	ESCO2	1	1	1	protein_coding	0	0	1
ENSG00000173153	ESRRA	1	1	1	protein_coding	0	0	1
ENSG00000174371	EXO1	0	1	1	protein_coding	0	0	1
ENSG00000120699	EXOSC8	0	1	1	protein_coding	0	0	1
ENSG00000112319	EYA4	1	0	1	protein_coding	1	1	0
ENSG00000138439	FAM117B	1	1	1	protein_coding	0	0	1
ENSG00000155744	FAM126B	1	0	1	protein_coding	0	1	1
ENSG00000054965	FAM168A	1	1	0	protein_coding	0	0	1
ENSG00000139438	FAM222A	0	1	1	protein_coding	0	1	0
ENSG00000126882	FAM78A	1	1	0	protein_coding	1	1	1
ENSG00000168672	FAM84B	1	1	0	protein_coding	0	1	0
ENSG00000119812	FAM98A	1	1	1	protein_coding	0	0	1
ENSG00000135108	FBXO21	1	1	1	protein_coding	0	1	0
ENSG00000165355	FBXO33	1	1	1	protein_coding	0	1	1
ENSG00000157107	FCHO2	1	0	1	protein_coding	1	0	0
ENSG00000053254	FOXN3	1	1	1	protein_coding	0	1	1
ENSG00000075539	FRYL	1	1	1	protein_coding	0	1	0
ENSG00000069509	FUNDC1	1	1	0	protein_coding	0	0	1
ENSG00000140564	FURIN	1	1	1	protein_coding	1	1	1
ENSG00000137726	FXYD6	1	0	1	protein_coding	0	0	1
ENSG00000141349	G6PC3	1	1	1	protein_coding	0	1	0
ENSG00000109458	GAB1	1	1	1	protein_coding	0	1	0
ENSG00000179348	GATA2	1	1	0	protein_coding	0	1	0
ENSG00000179409	GEMIN4	1	1	0	protein_coding	0	0	1
ENSG00000103365	GGA2	1	1	0	protein_coding	1	1	0
ENSG00000123159	GIPC1	1	1	1	protein_coding	0	0	1
ENSG00000182963	GJC1	1	1	1	protein_coding	1	0	1
ENSG00000126603	GLIS2	1	1	1	protein_coding	1	0	1
ENSG00000124767	GLO1	1	1	1	protein_coding	0	0	1
ENSG00000139433	GLTP	1	1	1	protein_coding	1	1	0
ENSG00000119927	GPAM	0	1	1	protein_coding	1	1	1
ENSG00000063660	GPC1	0	1	1	protein_coding	1	0	0
ENSG00000125772	GPCPD1	1	0	1	protein_coding	0	0	1
ENSG00000115159	GPD2	1	1	1	protein_coding	1	1	1
ENSG00000116157	GPX7	1	1	1	protein_coding	0	0	1
ENSG00000151233	GXYLT1	0	1	1	protein_coding	1	1	1
ENSG00000132475	H3F3B	1	1	1	protein_coding	0	1	1
ENSG00000099822	HCN2	1	1	0	protein_coding	0	0	1
ENSG00000177374	HIC1	1	1	0	protein_coding	1	1	1
ENSG00000064393	HIPK2	1	1	1	protein_coding	1	1	0
ENSG00000110422	HIPK3	1	1	0	protein_coding	1	1	0
ENSG00000071794	HLTF	1	1	1	protein_coding	0	0	1
ENSG00000169813	HNRNPF	1	1	0	protein_coding	0	1	0
ENSG00000106004	HOXA5	1	1	0	protein_coding	1	1	0
ENSG00000112144	ICK	1	1	0	protein_coding	0	0	1
ENSG00000117318	ID3	1	1	0	protein_coding	0	1	0
ENSG00000115461	IGFBP5	1	1	0	protein_coding	0	0	1
ENSG00000141401	IMPA2	1	1	0	protein_coding	0	0	1
ENSG00000154059	IMPACT	1	1	1	protein_coding	1	0	1
ENSG00000140044	JDP2	1	1	0	protein_coding	0	0	1
ENSG00000152409	JMY	1	1	0	protein_coding	0	0	1
ENSG00000100196	KDELR3	1	1	0	protein_coding	0	0	1
ENSG00000004487	KDM1A	0	1	1	protein_coding	0	0	1
ENSG00000006459	KDM7A	1	1	1	protein_coding	0	0	1
ENSG00000257093	KIAA1147	0	1	1	protein_coding	1	1	1
ENSG00000165185	KIAA1958	1	1	0	protein_coding	1	0	1
ENSG00000163884	KLF15	1	1	1	protein_coding	1	0	1
ENSG00000104341	LAPTM4B	1	1	1	protein_coding	0	1	1
ENSG00000162511	LAPTM5	1	1	0	protein_coding	0	0	1
ENSG00000157978	LDLRAP1	1	0	1	protein_coding	1	0	0
ENSG00000064042	LIMCH1	1	0	1	protein_coding	1	0	1
ENSG00000189067	LITAF	1	1	1	protein_coding	1	0	0
ENSG00000139636	LMBR1L	1	0	1	protein_coding	0	1	1
ENSG00000113368	LMNB1	1	1	1	protein_coding	0	1	1
ENSG00000161021	MAML1	1	1	0	protein_coding	1	0	1
ENSG00000112062	MAPK14	1	1	1	protein_coding	1	1	0
ENSG00000166987	MBD6	1	0	1	protein_coding	0	0	1
ENSG00000076770	MBNL3	1	0	1	protein_coding	1	0	0
ENSG00000112559	MDFI	1	1	0	protein_coding	0	1	0
ENSG00000161920	MED11	1	1	1	protein_coding	0	0	1
ENSG00000180182	MED14	1	1	1	protein_coding	0	1	1
ENSG00000160563	MED27	1	1	1	protein_coding	0	0	1
ENSG00000106780	MEGF9	1	1	1	protein_coding	0	0	1
ENSG00000197006	METTL9	1	1	0	protein_coding	0	0	1
ENSG00000187098	MITF	1	1	1	protein_coding	1	0	1
ENSG00000100427	MLC1	1	1	0	protein_coding	0	0	1
ENSG00000112110	MRPL18	1	1	1	protein_coding	0	0	1
ENSG00000095002	MSH2	1	0	1	protein_coding	0	0	1
ENSG00000135097	MSI1	1	1	1	protein_coding	0	1	1
ENSG00000153944	MSI2	1	1	1	protein_coding	0	1	1
ENSG00000147649	MTDH	0	1	1	protein_coding	1	1	1
ENSG00000066855	MTFR1	1	1	0	protein_coding	0	0	1
ENSG00000065911	MTHFD2	1	1	0	protein_coding	0	0	1
ENSG00000182534	MXRA7	1	0	1	protein_coding	0	0	1
ENSG00000118513	MYB	1	1	0	protein_coding	1	0	0
ENSG00000197879	MYO1C	0	1	1	protein_coding	1	0	1
ENSG00000124920	MYRF	1	1	1	protein_coding	1	0	0
ENSG00000138386	NAB1	1	1	1	protein_coding	0	0	1
ENSG00000166886	NAB2	1	1	0	protein_coding	0	0	1
ENSG00000148411	NACC2	1	1	1	protein_coding	1	1	1
ENSG00000185818	NAT8L	1	1	0	protein_coding	1	0	1
ENSG00000144426	NBEAL1	1	1	0	protein_coding	0	1	1
ENSG00000154654	NCAM2	0	1	1	protein_coding	1	0	0
ENSG00000071051	NCK2	1	0	1	protein_coding	0	0	1
ENSG00000070614	NDST1	1	0	1	protein_coding	1	1	1
ENSG00000125967	NECAB3	1	1	0	protein_coding	0	0	1
ENSG00000157191	NECAP2	1	1	1	protein_coding	1	0	0
ENSG00000100285	NEFH	1	1	0	protein_coding	0	0	1
ENSG00000117650	NEK2	1	1	1	protein_coding	0	1	1
ENSG00000119638	NEK9	0	1	1	protein_coding	1	0	0
ENSG00000214357	NEURL1B	1	1	1	protein_coding	1	1	1
ENSG00000147862	NFIB	1	1	1	protein_coding	1	1	1
ENSG00000144802	NFKBIZ	1	0	1	protein_coding	1	0	0
ENSG00000196865	NHLRC2	1	1	1	protein_coding	1	0	1
ENSG00000084628	NKAIN1	0	1	1	protein_coding	0	0	1
ENSG00000103202	NME4	1	1	1	protein_coding	1	0	0
ENSG00000139910	NOVA1	1	0	1	protein_coding	0	1	0
ENSG00000134986	NREP	1	0	1	protein_coding	0	1	1
ENSG00000099250	NRP1	0	1	1	protein_coding	1	0	1
ENSG00000168268	NT5DC2	1	0	1	protein_coding	0	0	1
ENSG00000120253	NUP43	1	1	1	protein_coding	0	0	1
ENSG00000101888	NXT2	1	1	1	protein_coding	1	1	1
ENSG00000184792	OSBP2	1	0	1	protein_coding	1	0	1
ENSG00000091039	OSBPL8	1	1	0	protein_coding	1	0	1
ENSG00000092094	OSGEP	1	1	1	protein_coding	0	0	1
ENSG00000120727	PAIP2	1	1	1	protein_coding	0	1	0
ENSG00000180370	PAK2	0	1	1	protein_coding	0	0	1
ENSG00000156374	PCGF6	1	1	1	protein_coding	0	0	1
ENSG00000141179	PCTP	1	1	1	protein_coding	0	0	1
ENSG00000249915	PDCD6	1	1	1	protein_coding	1	0	1
ENSG00000065989	PDE4A	1	1	0	protein_coding	1	0	1
ENSG00000065485	PDIA5	0	1	1	protein_coding	0	1	0
ENSG00000120913	PDLIM2	0	1	1	protein_coding	0	1	0
ENSG00000154553	PDLIM3	1	0	1	protein_coding	0	0	1
ENSG00000139946	PELI2	1	0	1	protein_coding	0	1	0
ENSG00000167085	PHB	1	1	1	protein_coding	0	1	0
ENSG00000156531	PHF6	1	1	1	protein_coding	1	1	0
ENSG00000092621	PHGDH	1	1	1	protein_coding	0	1	1
ENSG00000057757	PITHD1	1	1	1	protein_coding	0	1	0
ENSG00000162878	PKDCC	1	1	1	protein_coding	0	0	1
ENSG00000196576	PLXNB2	1	0	1	protein_coding	1	0	1
ENSG00000163389	POGLUT1	1	1	1	protein_coding	1	1	0
ENSG00000186951	PPARA	0	1	1	protein_coding	0	0	1
ENSG00000132170	PPARG	0	1	1	protein_coding	0	1	0
ENSG00000168938	PPIC	1	1	0	protein_coding	0	0	1
ENSG00000108179	PPIF	1	1	1	protein_coding	1	1	0
ENSG00000186298	PPP1CC	0	1	1	protein_coding	0	1	0
ENSG00000173457	PPP1R14B	1	1	1	protein_coding	0	0	1
ENSG00000173281	PPP1R3B	0	1	1	protein_coding	1	0	0
ENSG00000149923	PPP4C	1	1	1	protein_coding	0	1	0
ENSG00000163605	PPP4R2	1	1	1	protein_coding	0	1	1
ENSG00000183943	PRKX	1	1	1	protein_coding	0	1	0
ENSG00000068489	PRR11	0	1	1	protein_coding	0	0	1
ENSG00000131470	PSMC3IP	1	1	0	protein_coding	0	0	1
ENSG00000148334	PTGES2	0	1	1	protein_coding	0	0	1
ENSG00000134247	PTGFRN	1	1	1	protein_coding	0	1	1
ENSG00000105894	PTN	1	1	1	protein_coding	0	0	1
ENSG00000171016	PYGO1	1	1	1	protein_coding	0	0	1
ENSG00000112531	QKI	1	1	1	protein_coding	1	1	1
ENSG00000185236	RAB11B	1	0	1	protein_coding	0	0	1
ENSG00000069974	RAB27A	1	0	1	protein_coding	1	1	0
ENSG00000099901	RANBP1	0	1	1	protein_coding	0	0	1
ENSG00000172819	RARG	0	1	1	protein_coding	1	0	0
ENSG00000162437	RAVER2	1	1	1	protein_coding	1	0	1
ENSG00000089050	RBBP9	1	0	1	protein_coding	0	0	1
ENSG00000168214	RBPJ	1	1	1	protein_coding	0	0	1
ENSG00000166831	RBPMS2	1	1	1	protein_coding	0	1	0
ENSG00000180198	RCC1	1	1	1	protein_coding	0	0	1
ENSG00000167771	RCOR2	1	1	1	protein_coding	0	0	1
ENSG00000004700	RECQL	1	1	1	protein_coding	0	0	1
ENSG00000181826	RELL1	0	1	1	protein_coding	0	0	1
ENSG00000133119	RFC3	0	1	1	protein_coding	0	0	1
ENSG00000237441	RGL2	1	1	0	protein_coding	0	1	0
ENSG00000151692	RNF144A	1	0	1	protein_coding	1	1	0
ENSG00000063978	RNF4	1	1	0	protein_coding	0	0	1
ENSG00000142327	RNPEPL1	1	1	1	protein_coding	1	1	0
ENSG00000142676	RPL11	1	1	1	protein_coding	0	0	1
ENSG00000174748	RPL15	1	1	0	protein_coding	0	0	1
ENSG00000163682	RPL9	1	1	1	protein_coding	0	0	1
ENSG00000110700	RPS13	1	1	1	protein_coding	0	0	1
ENSG00000100784	RPS6KA5	1	1	1	protein_coding	0	1	0
ENSG00000048392	RRM2B	1	1	0	protein_coding	1	0	1
ENSG00000187257	RSBN1L	1	1	0	protein_coding	0	1	0
ENSG00000163785	RYK	1	1	1	protein_coding	1	0	1
ENSG00000152700	SAR1B	1	1	0	protein_coding	1	0	1
ENSG00000145284	SCD5	0	1	1	protein_coding	0	0	1
ENSG00000105711	SCN1B	1	1	0	protein_coding	0	0	1
ENSG00000100445	SDR39U1	0	1	1	protein_coding	0	0	1
ENSG00000121542	SEC22A	1	0	1	protein_coding	0	1	0
ENSG00000058262	SEC61A1	1	1	1	protein_coding	0	1	0
ENSG00000120742	SERP1	1	1	1	protein_coding	1	0	1
ENSG00000145391	SETD7	1	1	0	protein_coding	0	1	1
ENSG00000156398	SFXN2	1	1	1	protein_coding	0	1	0
ENSG00000198964	SGMS1	1	1	1	protein_coding	1	1	0
ENSG00000166224	SGPL1	1	1	1	protein_coding	1	0	1
ENSG00000146950	SHROOM2	1	1	0	protein_coding	0	0	1
ENSG00000077463	SIRT6	1	1	1	protein_coding	0	0	1
ENSG00000136603	SKIL	1	1	0	protein_coding	0	0	1
ENSG00000165449	SLC16A9	0	1	1	protein_coding	0	0	1
ENSG00000105281	SLC1A5	1	1	1	protein_coding	0	0	1
ENSG00000005022	SLC25A5	1	1	1	protein_coding	0	0	1
ENSG00000155850	SLC26A2	1	0	1	protein_coding	1	0	1
ENSG00000130304	SLC27A1	1	1	0	protein_coding	1	0	0
ENSG00000176087	SLC35A4	1	1	1	protein_coding	1	0	1
ENSG00000180773	SLC36A4	0	1	1	protein_coding	0	0	1
ENSG00000133195	SLC39A11	0	1	1	protein_coding	0	1	0
ENSG00000165915	SLC39A13	1	0	1	protein_coding	0	1	0
ENSG00000133065	SLC41A1	1	1	0	protein_coding	0	0	1
ENSG00000167703	SLC43A2	1	1	0	protein_coding	0	0	1
ENSG00000142494	SLC47A1	1	1	0	protein_coding	0	0	1
ENSG00000196517	SLC6A9	1	1	0	protein_coding	0	0	1
ENSG00000003989	SLC7A2	1	1	1	protein_coding	1	0	1
ENSG00000065054	SLC9A3R2	1	1	0	protein_coding	0	0	1
ENSG00000113658	SMAD5	1	1	0	protein_coding	1	1	0
ENSG00000120693	SMAD9	1	1	0	protein_coding	0	1	0
ENSG00000163683	SMIM14	1	1	0	protein_coding	0	1	0
ENSG00000108854	SMURF2	1	0	1	protein_coding	1	1	1
ENSG00000023608	SNAPC1	1	1	0	protein_coding	0	0	1
ENSG00000182004	SNRPE	1	1	1	protein_coding	0	0	1
ENSG00000168807	SNTB2	1	1	0	protein_coding	1	0	0
ENSG00000147164	SNX12	0	1	1	protein_coding	0	1	0
ENSG00000005513	SOX8	1	1	0	protein_coding	1	0	0
ENSG00000185591	SP1	1	1	0	protein_coding	1	1	1
ENSG00000063176	SPHK2	1	1	0	protein_coding	0	0	1
ENSG00000144228	SPOPL	1	1	0	protein_coding	1	1	0
ENSG00000100596	SPTLC2	1	1	1	protein_coding	1	1	1
ENSG00000179119	SPTY2D1	0	1	1	protein_coding	1	1	1
ENSG00000197122	SRC	1	1	1	protein_coding	0	0	1
ENSG00000153006	SREK1IP1	1	1	1	protein_coding	1	0	0
ENSG00000135250	SRPK2	1	1	1	protein_coding	0	1	0
ENSG00000141380	SS18	1	1	1	protein_coding	0	1	1
ENSG00000114850	SSR3	0	1	1	protein_coding	0	0	1
ENSG00000100380	ST13	1	1	0	protein_coding	0	0	1
ENSG00000109689	STIM2	1	1	0	protein_coding	0	1	0
ENSG00000104375	STK3	1	1	1	protein_coding	0	0	1
ENSG00000144455	SUMF1	1	1	1	protein_coding	1	0	0
ENSG00000152455	SUV39H2	1	1	0	protein_coding	1	0	0
ENSG00000178691	SUZ12	1	1	0	protein_coding	0	1	1
ENSG00000011347	SYT7	0	1	1	protein_coding	0	0	1
ENSG00000055070	SZRD1	1	1	1	protein_coding	0	1	0
ENSG00000120656	TAF12	1	1	0	protein_coding	0	0	1
ENSG00000140262	TCF12	1	1	1	protein_coding	0	0	1
ENSG00000071564	TCF3	0	1	1	protein_coding	1	0	1
ENSG00000196628	TCF4	1	1	1	protein_coding	1	1	1
ENSG00000101190	TCFL5	1	1	0	protein_coding	0	0	1
ENSG00000119977	TCTN3	1	1	1	protein_coding	0	0	1
ENSG00000112561	TFEB	0	1	1	protein_coding	1	1	0
ENSG00000119139	TJP2	1	1	1	protein_coding	1	0	1
ENSG00000117500	TMED5	1	1	1	protein_coding	0	1	1
ENSG00000241697	TMEFF1	0	1	1	protein_coding	0	1	0
ENSG00000166822	TMEM170A	1	1	0	protein_coding	0	1	0
ENSG00000150433	TMEM218	1	1	1	protein_coding	0	0	1
ENSG00000144747	TMF1	1	1	0	protein_coding	0	0	1
ENSG00000120802	TMPO	1	1	0	protein_coding	0	0	1
ENSG00000034510	TMSB10	1	1	1	protein_coding	0	1	0
ENSG00000139921	TMX1	1	1	1	protein_coding	0	1	1
ENSG00000131323	TRAF3	0	1	1	protein_coding	1	1	1
ENSG00000113595	TRIM23	1	1	1	protein_coding	0	1	1
ENSG00000099899	TRMT2A	0	1	1	protein_coding	0	1	0
ENSG00000089195	TRMT6	1	1	1	protein_coding	1	0	1
ENSG00000211460	TSN	1	0	1	protein_coding	1	0	1
ENSG00000105948	TTC26	1	1	1	protein_coding	1	0	1
ENSG00000114999	TTL	1	1	1	protein_coding	1	0	1
ENSG00000166402	TUB	1	1	1	protein_coding	1	1	0
ENSG00000078246	TULP3	1	1	1	protein_coding	0	0	1
ENSG00000128791	TWSG1	1	1	1	protein_coding	1	0	1
ENSG00000129235	TXNDC17	1	1	1	protein_coding	0	0	1
ENSG00000265972	TXNIP	1	1	1	protein_coding	0	1	0
ENSG00000072401	UBE2D1	0	1	1	protein_coding	0	1	0
ENSG00000182247	UBE2E2	1	1	0	protein_coding	0	1	0
ENSG00000184182	UBE2F	0	1	1	protein_coding	0	1	1
ENSG00000177889	UBE2N	1	1	1	protein_coding	0	1	0
ENSG00000104343	UBE2W	0	1	1	protein_coding	1	1	0
ENSG00000164332	UBLCP1	1	1	1	protein_coding	0	0	1
ENSG00000159459	UBR1	0	1	1	protein_coding	0	1	0
ENSG00000169764	UGP2	1	1	1	protein_coding	0	0	1
ENSG00000110057	UNC93B1	1	1	1	protein_coding	0	0	1
ENSG00000135093	USP30	1	1	1	protein_coding	1	0	1
ENSG00000055483	USP36	1	1	1	protein_coding	0	0	1
ENSG00000170185	USP38	1	1	1	protein_coding	1	0	1
ENSG00000162738	VANGL2	1	1	1	protein_coding	1	1	0
ENSG00000143494	VASH2	1	1	0	protein_coding	0	1	1
ENSG00000167397	VKORC1	1	1	1	protein_coding	0	0	1
ENSG00000147852	VLDLR	1	0	1	protein_coding	1	0	0
ENSG00000119541	VPS4B	1	1	1	protein_coding	1	1	0
ENSG00000176834	VSIG10	1	1	1	protein_coding	1	0	1
ENSG00000166272	WBP1L	1	1	1	protein_coding	0	1	0
ENSG00000166483	WEE1	1	1	1	protein_coding	0	1	0
ENSG00000060237	WNK1	1	1	1	protein_coding	1	1	0
ENSG00000065978	YBX1	1	1	1	protein_coding	0	0	1
ENSG00000127337	YEATS4	0	1	1	protein_coding	0	0	1
ENSG00000166913	YWHAB	1	1	1	protein_coding	0	1	0
ENSG00000160685	ZBTB7B	1	1	0	protein_coding	1	0	0
ENSG00000014164	ZC3H3	1	1	1	protein_coding	0	0	1
ENSG00000185650	ZFP36L1	1	1	0	protein_coding	1	1	0
ENSG00000152518	ZFP36L2	0	1	1	protein_coding	1	1	1
ENSG00000163848	ZNF148	1	1	0	protein_coding	1	0	1
ENSG00000172466	ZNF24	0	1	1	protein_coding	0	1	1
ENSG00000161642	ZNF385A	1	1	1	protein_coding	0	1	1
ENSG00000186918	ZNF395	1	0	1	protein_coding	0	1	0
ENSG00000168916	ZNF608	1	1	0	protein_coding	1	1	0
ENSG00000157657	ZNF618	1	0	1	protein_coding	1	1	0
ENSG00000198740	ZNF652	1	1	0	protein_coding	1	1	0
ENSG00000117174	ZNHIT6	1	1	1	protein_coding	1	0	1
ENSG00000132003	ZSWIM4	1	1	0	protein_coding	0	0	1
