# Supplementary material for: Synergism of Pro-neurogenic miRNAs&nbsp;Provides a More Effective Strategy to Target Glioma Stem Cells
Source: Research Square preprint supplement (doi:10.21203/rs.3.rs-125940/v1), 2020-12-15
Supplement: Supplementary file 2 [file 253a38b2cf4e06e5ddf19635.xlsx]

## Sheet: Sheet1
GO_VERSION	releases/2018-05-14
NETWORK_NAME	central nervous system
NETWORK_VERSION	dd4974d1f0dc5bb5b8b11b6c657f4cd6c1a65d28
DATE_CREATED	Thu Aug 13 2020 15:50:20 GMT-0500 (Central Daylight Time)
CLUSTER_NAME	CLUSTER_GENES
M1	AK2,APEX1,ATL3,BAG2,BID,C4orf46,CBFB,CDCA7L,CORO1C,COX7B,CRKL,CYB5R4,DEPDC1B,DR1,DTL,E2F7,EIF2S3,ESCO2,EXO1,EXOSC8,GEMIN4,GLO1,HNRNPF,KDM1A,LAPTM4B,LMNB1,MED27,METTL9,MRPL18,MSH2,MTHFD2,MYB,NEK2,NUP43,PCGF6,PDCD6,PHB,PPIF,PPP1CC,PSMC3IP,RANBP1,RCC1,RFC3,RNF4,RPL11,RPL15,RPL9,RPS13,SDR39U1,SFXN2,SLC25A5,SNRPE,SS18,TAF12,TMPO,TRMT6,TSN,TXNDC17,UBE2F,UBE2N,UBLCP1,WEE1,YBX1,YEATS4,YWHAB
M2	ABCA12,ACTA2,AGPAT3,AIF1L,AKT2,ALDH4A1,ANGPTL2,APH1B,APLNR,ARHGAP42,ASPH,B4GALT1,BCORL1,BEND4,C6orf47,CACFD1,CDH11,CDH24,CLDN11,CNN2,CPLX1,CPT1A,CTDSPL,CTSF,CXCL12,DBN1,DIRAS1,DPF3,DVL2,ECE1,EFEMP2,EFNA2,EGFR,EHBP1L1,EN1,ESRRA,EYA4,FAM222A,FAM78A,FURIN,FXYD6,GATA2,GIPC1,GJC1,GLIS2,GPC1,HCN2,HIC1,HIPK2,HOXA5,IGFBP5,JDP2,KDELR3,KLF15,LIMCH1,LMBR1L,MBD6,MBNL3,MDFI,MED14,MITF,MLC1,MSI1,MXRA7,MYO1C,MY…
M3	ADAM9,AHCYL1,AIDA,APPL2,ASXL2,BAZ1A,BMI1,CASC3,CD2AP,CNOT6,DAZAP2,DCP2,DHX40,DPY19L4,DYRK2,EFR3A,ELMOD2,FBXO21,FBXO33,FOXN3,FRYL,GPAM,GPCPD1,GXYLT1,H3F3B,HLTF,ICK,IMPACT,JMY,KIAA1147,MAML1,MEGF9,MTDH,NAB1,NHLRC2,NXT2,OSBPL8,PAIP2,PAK2,PRKX,QKI,RBPJ,RECQL,RPS6KA5,RRM2B,RSBN1L,RYK,SERP1,SGMS1,SLC26A2,SMAD5,SMURF2,SNAPC1,SPOPL,SREK1IP1,SRPK2,SSR3,ST13,STIM2,STK3,SUZ12,TCF12,TCFL5,TJP2,TMED5,TMF1,TRI…
CLUSTER_NAME	TERM_NAME	GO_ID	TERM_Q_VALUE	GENE_COUNT	TERM_GENES
M1	histone modification	GO:0016570	0.00821835	8	TAF12,UBE2N,PCGF6,DR1,KDM1A,YEATS4,MYB,PHB
M1	covalent chromatin modification	GO:0016569	0.00821835	8	TAF12,UBE2N,PCGF6,DR1,KDM1A,YEATS4,MYB,PHB
M1	postreplication repair	GO:0006301	0.00821835	3	DTL,MSH2,UBE2N
M1	regulation of protein ubiquitination	GO:0031396	0.0152079	5	PDCD6,UBE2N,KDM1A,RPL11,BAG2
M1	regulation of protein modification by small protein conjugation or removal	GO:1903320	0.0165816	5	PDCD6,UBE2N,KDM1A,RPL11,BAG2
M1	regulation of membrane permeability	GO:0090559	0.0172017	3	LAPTM4B,SLC25A5,PPIF
M1	regulation of ubiquitin-protein transferase activity	GO:0051438	0.0172017	3	BAG2,UBE2N,RPL11
M1	DNA repair	GO:0006281	0.0177105	6	EXO1,UBE2N,APEX1,KDM1A,MSH2,DTL
M1	histone ubiquitination	GO:0016574	0.0177105	3	PCGF6,KDM1A,UBE2N
M1	regulation of DNA metabolic process	GO:0051052	0.0177105	6	ESCO2,UBE2N,NEK2,KDM1A,MSH2,RFC3
M1	positive regulation of protein processing	GO:0010954	0.0177105	2	BAG2,PHB
M1	protein neddylation	GO:0045116	0.0177105	2	UBE2F,RPL11
M1	negative regulation of ubiquitin protein ligase activity	GO:1904667	0.0177105	2	BAG2,RPL11
M1	regulation of histone ubiquitination	GO:0033182	0.0177105	2	KDM1A,UBE2N
M1	DNA recombination	GO:0006310	0.0184671	4	KDM1A,EXO1,UBE2N,MSH2
M1	positive regulation of protein maturation	GO:1903319	0.0184671	2	BAG2,PHB
M1	neural crest cell development	GO:0014032	0.0184671	2	PDCD6,CORO1C
M1	mesenchymal cell development	GO:0014031	0.0184671	2	PDCD6,CORO1C
M1	positive regulation of histone modification	GO:0031058	0.0188293	3	MYB,KDM1A,UBE2N
M1	positive regulation of chromosome organization	GO:2001252	0.0188293	4	MYB,KDM1A,UBE2N,NEK2
M1	stem cell development	GO:0048864	0.0188293	2	PDCD6,CORO1C
M1	neural crest cell differentiation	GO:0014033	0.0188293	2	PDCD6,CORO1C
M1	protein monoubiquitination	GO:0006513	0.0201036	3	PDCD6,DTL,PCGF6
M1	positive regulation of chromatin organization	GO:1905269	0.0204221	3	MYB,KDM1A,UBE2N
M1	regulation of chromosome organization	GO:0033044	0.0204221	5	UBE2N,NEK2,KDM1A,MYB,RNF4
M1	negative regulation of ubiquitin-protein transferase activity	GO:0051444	0.0204221	2	BAG2,RPL11
M1	regulation of ubiquitin protein ligase activity	GO:1904666	0.0227543	2	BAG2,RPL11
M1	protein acetylation	GO:0006473	0.0247019	4	YEATS4,DR1,ESCO2,TAF12
M1	mismatch repair	GO:0006298	0.0247019	2	EXO1,MSH2
M1	apoptotic mitochondrial changes	GO:0008637	0.0301039	3	PPIF,SLC25A5,BID
M1	signal transduction in response to DNA damage	GO:0042770	0.0321815	3	DTL,KDM1A,E2F7
M1	regulation of histone modification	GO:0031056	0.0325921	3	MYB,KDM1A,UBE2N
M1	mitochondrial outer membrane permeabilization involved in programmed cell death	GO:1902686	0.0328992	2	PPIF,SLC25A5
M1	positive regulation of protein ubiquitination	GO:0031398	0.0338651	3	PDCD6,KDM1A,UBE2N
M1	positive regulation of mitochondrial membrane permeability	GO:0035794	0.0348364	2	PPIF,SLC25A5
M1	positive regulation of membrane permeability	GO:1905710	0.0376841	2	PPIF,SLC25A5
M1	regulation of mitochondrion organization	GO:0010821	0.0391008	3	PPIF,SLC25A5,BID
M1	protein acylation	GO:0043543	0.0391008	4	YEATS4,DR1,ESCO2,TAF12
M1	negative regulation of catabolic process	GO:0009895	0.0391008	4	YBX1,LAPTM4B,PHB,RPL11
M1	negative regulation of protein catabolic process	GO:0042177	0.0391008	3	LAPTM4B,PHB,RPL11
M1	positive regulation of protein modification by small protein conjugation or removal	GO:1903322	0.0419588	3	PDCD6,KDM1A,UBE2N
M1	signal transduction by p53 class mediator	GO:0072331	0.0419588	3	RPL11,KDM1A,E2F7
M1	negative regulation of mitochondrion organization	GO:0010823	0.0423265	2	PPIF,SLC25A5
M1	regulation of chromatin organization	GO:1902275	0.0423265	3	MYB,KDM1A,UBE2N
M1	spliceosomal snRNP assembly	GO:0000387	0.0423265	2	SNRPE,GEMIN4
M1	mitochondrial transport	GO:0006839	0.0427527	3	PPIF,MRPL18,SLC25A5
M1	RNA splicing	GO:0008380	0.0427527	4	HNRNPF,SNRPE,GEMIN4,RPS13
M1	mRNA metabolic process	GO:0016071	0.0435765	5	GEMIN4,YBX1,APEX1,SNRPE,TRMT6
M1	regulation of mitochondrial membrane permeability	GO:0046902	0.0447537	2	PPIF,SLC25A5
M1	regulation of release of cytochrome c from mitochondria	GO:0090199	0.0492826	2	PPIF,BID
M1	histone acetylation	GO:0016573	0.0494928	3	YEATS4,DR1,TAF12
M1	DNA biosynthetic process	GO:0071897	0.0494928	3	DTL,RFC3,NEK2
M1	regulation of substrate adhesion-dependent cell spreading	GO:1900024	0.0502504	2	CORO1C,CRKL
M1	internal peptidyl-lysine acetylation	GO:0018393	0.0526948	3	YEATS4,DR1,TAF12
M1	regulation of apoptotic signaling pathway	GO:2001233	0.0532889	4	PPIF,KDM1A,SLC25A5,BID
M1	internal protein amino acid acetylation	GO:0006475	0.0536258	3	YEATS4,DR1,TAF12
M1	peptidyl-lysine acetylation	GO:0018394	0.0541688	3	YEATS4,DR1,TAF12
M1	ribonucleoprotein complex assembly	GO:0022618	0.0550909	3	SNRPE,GEMIN4,RPL11
M1	regulation of protein processing	GO:0070613	0.0580014	2	BAG2,PHB
M1	ribonucleoprotein complex subunit organization	GO:0071826	0.0601595	3	SNRPE,GEMIN4,RPL11
M1	regulation of protein catabolic process	GO:0042176	0.0605869	4	LAPTM4B,DTL,PHB,RPL11
M1	negative regulation of apoptotic signaling pathway	GO:2001234	0.0610432	3	PPIF,KDM1A,SLC25A5
M1	release of cytochrome c from mitochondria	GO:0001836	0.0610432	2	PPIF,BID
M1	regulation of DNA recombination	GO:0000018	0.0610432	2	KDM1A,MSH2
M1	regulation of protein maturation	GO:1903317	0.0610432	2	BAG2,PHB
M1	regulation of mRNA stability	GO:0043488	0.0615366	2	YBX1,APEX1
M1	regulation of signal transduction by p53 class mediator	GO:1901796	0.0615366	2	KDM1A,RPL11
M1	peptidyl-lysine modification	GO:0018205	0.0637894	4	YEATS4,DR1,TAF12,MYB
M1	protein polyubiquitination	GO:0000209	0.0654875	3	CBFB,DTL,UBE2N
M1	protein stabilization	GO:0050821	0.0654875	3	BAG2,PHB,RPL11
M1	demethylation	GO:0070988	0.0680399	2	APEX1,KDM1A
M1	regulation of RNA stability	GO:0043487	0.0680399	2	YBX1,APEX1
M1	regulation of protein binding	GO:0043393	0.0680399	3	KDM1A,BAG2,RPL11
M1	DNA damage response, signal transduction by p53 class mediator	GO:0030330	0.0680399	2	KDM1A,E2F7
M1	mitochondrion organization	GO:0007005	0.0680586	4	PPIF,BID,SLC25A5,PHB
M1	positive regulation of DNA metabolic process	GO:0051054	0.0680586	3	RFC3,UBE2N,NEK2
M1	negative regulation of protein ubiquitination	GO:0031397	0.0680586	2	BAG2,RPL11
M1	stem cell differentiation	GO:0048863	0.0680586	2	PDCD6,CORO1C
M1	histone H3 acetylation	GO:0043966	0.0684577	2	DR1,TAF12
M1	positive regulation of DNA biosynthetic process	GO:2000573	0.0684577	2	NEK2,RFC3
M1	protein dephosphorylation	GO:0006470	0.0685617	3	YWHAB,PPP1CC,UBLCP1
M1	membrane organization	GO:0061024	0.0701841	4	PDCD6,PPIF,SLC25A5,LAPTM4B
M1	regulation of G-protein coupled receptor protein signaling pathway	GO:0008277	0.0714951	2	YWHAB,PHB
M1	negative regulation of cellular catabolic process	GO:0031330	0.0717305	3	YBX1,LAPTM4B,RPL11
M1	regulation of DNA replication	GO:0006275	0.0720518	2	ESCO2,RFC3
M1	negative regulation of cellular protein catabolic process	GO:1903363	0.0720518	2	LAPTM4B,RPL11
M1	negative regulation of protein modification by small protein conjugation or removal	GO:1903321	0.0720518	2	BAG2,RPL11
M1	mitochondrial membrane organization	GO:0007006	0.0754205	2	PPIF,SLC25A5
M1	substrate adhesion-dependent cell spreading	GO:0034446	0.0754205	2	CORO1C,CRKL
M1	negative regulation of intrinsic apoptotic signaling pathway	GO:2001243	0.0805179	2	PPIF,KDM1A
M1	positive regulation of DNA binding transcription factor activity	GO:0051091	0.080998	3	TAF12,KDM1A,UBE2N
M1	negative regulation of transferase activity	GO:0051348	0.0828137	3	CORO1C,BAG2,RPL11
M1	regulation of mRNA catabolic process	GO:0061013	0.0832126	2	YBX1,APEX1
M1	negative regulation of intracellular signal transduction	GO:1902532	0.0858066	4	PDCD6,PPIF,KDM1A,PHB
M1	regulation of cell morphogenesis involved in differentiation	GO:0010769	0.0858066	2	CORO1C,CRKL
M1	ribonucleoprotein complex biogenesis	GO:0022613	0.0887541	3	SNRPE,GEMIN4,RPL11
M1	spindle assembly	GO:0051225	0.090976	2	RCC1,RNF4
M1	negative regulation of protein binding	GO:0032091	0.0965227	2	KDM1A,BAG2
M1	positive regulation of immune effector process	GO:0002699	0.0972512	2	MYB,PHB
M1	double-strand break repair via homologous recombination	GO:0000724	0.0972512	2	KDM1A,UBE2N
M1	recombinational repair	GO:0000725	0.0983568	2	KDM1A,UBE2N
M2	blood vessel development	GO:0001568	0.0130548	9	GATA2,HOXA5,HIPK2,NRP1,ACTA2,PPARG,APLNR,SIRT6,VASH2
M2	pri-miRNA transcription by RNA polymerase II	GO:0061614	0.0130548	4	GATA2,PPARA,PPARG,NFIB
M2	vasculature development	GO:0001944	0.0132654	9	GATA2,HOXA5,HIPK2,NRP1,ACTA2,PPARG,APLNR,SIRT6,VASH2
M2	cardiovascular system development	GO:0072358	0.0132654	9	GATA2,HOXA5,HIPK2,NRP1,ACTA2,PPARG,APLNR,SIRT6,VASH2
M2	angiogenesis	GO:0001525	0.0152079	8	GATA2,HOXA5,HIPK2,NRP1,PPARG,APLNR,SIRT6,VASH2
M2	regulation of angiogenesis	GO:0045765	0.0152079	7	GATA2,HOXA5,HIPK2,PPARG,APLNR,SIRT6,VASH2
M2	regulation of receptor biosynthetic process	GO:0010869	0.0152079	3	PPARA,HOXA5,PPARG
M2	blood vessel morphogenesis	GO:0048514	0.0165816	8	GATA2,HOXA5,HIPK2,NRP1,PPARG,APLNR,SIRT6,VASH2
M2	regulation of vasculature development	GO:1901342	0.0165816	7	GATA2,HOXA5,HIPK2,PPARG,APLNR,SIRT6,VASH2
M2	receptor biosynthetic process	GO:0032800	0.0165816	3	PPARA,HOXA5,PPARG
M2	negative regulation of cholesterol storage	GO:0010887	0.0165816	2	PPARA,PPARG
M2	positive regulation of angiogenesis	GO:0045766	0.0177105	5	GATA2,HIPK2,APLNR,SIRT6,VASH2
M2	negative regulation of erythrocyte differentiation	GO:0045647	0.0177105	2	HOXA5,ZFP36L1
M2	negative regulation of sequestering of triglyceride	GO:0010891	0.0177105	2	PPARA,PPARG
M2	tube morphogenesis	GO:0035239	0.0184671	8	GATA2,HOXA5,HIPK2,NRP1,PPARG,APLNR,SIRT6,VASH2
M2	positive regulation of vasculature development	GO:1904018	0.0184671	5	GATA2,HIPK2,APLNR,SIRT6,VASH2
M2	positive regulation of cell migration	GO:0030335	0.0184671	8	GATA2,MYO1C,IGFBP5,EGFR,AKT2,CXCL12,SRC,NRP1
M2	negative regulation of lipid localization	GO:1905953	0.0184671	3	AKT2,PPARA,PPARG
M2	cellular response to cAMP	GO:0071320	0.0184671	3	IGFBP5,HCN2,ZFP36L1
M2	regulation of epithelial cell proliferation	GO:0050678	0.0184671	6	GATA2,EGFR,ZFP36L1,PPARG,SIRT6,VASH2
M2	negative regulation of receptor biosynthetic process	GO:0010871	0.0184671	2	PPARA,PPARG
M2	positive regulation of cell motility	GO:2000147	0.0188293	8	GATA2,MYO1C,IGFBP5,EGFR,AKT2,CXCL12,SRC,NRP1
M2	receptor metabolic process	GO:0043112	0.0188293	5	ECE1,HOXA5,FURIN,PPARA,PPARG
M2	negative regulation of macrophage derived foam cell differentiation	GO:0010745	0.0188293	2	PPARA,PPARG
M2	positive regulation of cellular component movement	GO:0051272	0.0200576	8	GATA2,MYO1C,IGFBP5,EGFR,AKT2,CXCL12,SRC,NRP1
M2	tube development	GO:0035295	0.0204221	8	GATA2,HOXA5,HIPK2,NRP1,PPARG,APLNR,SIRT6,VASH2
M2	regulation of lipid localization	GO:1905952	0.0204221	4	AKT2,PPARA,ABCA12,PPARG
M2	response to cAMP	GO:0051591	0.0204221	3	IGFBP5,HCN2,ZFP36L1
M2	epithelial cell proliferation	GO:0050673	0.0204221	6	GATA2,EGFR,ZFP36L1,PPARG,SIRT6,VASH2
M2	peptide hormone processing	GO:0016486	0.0204221	2	ECE1,FURIN
M2	negative regulation of pri-miRNA transcription by RNA polymerase II	GO:1902894	0.0204221	2	PPARA,NFIB
M2	regulation of cholesterol storage	GO:0010885	0.0204221	2	PPARA,PPARG
M2	regulation of sequestering of triglyceride	GO:0010889	0.0204221	2	PPARA,PPARG
M2	low-density lipoprotein receptor particle metabolic process	GO:0032799	0.0241822	2	PPARG,FURIN
M2	cholesterol storage	GO:0010878	0.0286394	2	PPARA,PPARG
M2	negative regulation of cell differentiation	GO:0045596	0.0301039	6	GATA2,HOXA5,EGFR,ZFP36L1,PPARA,PPARG
M2	negative regulation of lipid storage	GO:0010888	0.0319645	2	PPARA,PPARG
M2	sequestering of triglyceride	GO:0030730	0.0319645	2	PPARA,PPARG
M2	regulation of endothelial cell proliferation	GO:0001936	0.0338651	4	GATA2,PPARG,VASH2,SIRT6
M2	regulation of gene silencing	GO:0060968	0.0390148	3	PPARG,EGFR,SIRT6
M2	DNA damage response, signal transduction by p53 class mediator resulting in transcription of p21 class mediator	GO:0006978	0.0390148	2	ZNF385A,HIPK2
M2	response to purine-containing compound	GO:0014074	0.0391008	3	IGFBP5,HCN2,ZFP36L1
M2	response to organophosphorus	GO:0046683	0.0391008	3	IGFBP5,HCN2,ZFP36L1
M2	positive regulation of epithelial cell proliferation	GO:0050679	0.0391008	4	GATA2,EGFR,VASH2,SIRT6
M2	endothelial cell proliferation	GO:0001935	0.0391008	4	GATA2,PPARG,VASH2,SIRT6
M2	regulation of macrophage derived foam cell differentiation	GO:0010743	0.0391008	2	PPARA,PPARG
M2	DNA damage response, signal transduction resulting in transcription	GO:0042772	0.0391008	2	ZNF385A,HIPK2
M2	vascular endothelial cell proliferation	GO:0101023	0.0419588	2	PPARG,SIRT6
M2	regulation of vascular endothelial cell proliferation	GO:1905562	0.0419588	2	PPARG,SIRT6
M2	cellular response to hormone stimulus	GO:0032870	0.0423265	6	MED14,EGFR,ZFP36L1,AKT2,PPARA,PPARG
M2	cellular response to insulin stimulus	GO:0032869	0.0426621	3	AKT2,PPARG,ZFP36L1
M2	intrinsic apoptotic signaling pathway in response to DNA damage	GO:0008630	0.043555	3	HIC1,CXCL12,ZNF385A
M2	regulation of lipid transport	GO:0032368	0.044879	3	AKT2,PPARA,ABCA12
M2	protein processing	GO:0016485	0.044879	4	APH1B,ECE1,ASPH,FURIN
M2	heparan sulfate proteoglycan metabolic process	GO:0030201	0.044879	2	GPC1,NDST1
M2	macrophage derived foam cell differentiation	GO:0010742	0.044879	2	PPARA,PPARG
M2	foam cell differentiation	GO:0090077	0.044879	2	PPARA,PPARG
M2	response to insulin	GO:0032868	0.0461622	3	AKT2,PPARG,ZFP36L1
M2	regulation of intracellular transport	GO:0032386	0.046212	5	MYO1C,ZC3H3,MLC1,NEFH,SRC
M2	carbohydrate biosynthetic process	GO:0016051	0.0476833	3	AKT2,B4GALT1,NDST1
M2	positive regulation of endothelial cell proliferation	GO:0001938	0.0492826	3	GATA2,SIRT6,VASH2
M2	negative regulation of intrinsic apoptotic signaling pathway in response to DNA damage	GO:1902230	0.0508816	2	ZNF385A,CXCL12
M2	negative regulation of intrinsic apoptotic signaling pathway	GO:2001243	0.0511377	3	ZNF385A,CXCL12,SRC
M2	cellular response to organic cyclic compound	GO:0071407	0.0526948	6	IGFBP5,MED14,HCN2,EGFR,ZFP36L1,PPARA
M2	monocyte differentiation	GO:0030224	0.0532889	2	PPARG,ZFP36L1
M2	mononuclear cell differentiation	GO:1903131	0.0532889	2	PPARG,ZFP36L1
M2	cellular response to nitrogen compound	GO:1901699	0.0536258	6	IGFBP5,HCN2,EGFR,ZFP36L1,AKT2,PPARG
M2	response to hormone	GO:0009725	0.0540546	6	MED14,EGFR,ZFP36L1,AKT2,PPARA,PPARG
M2	vascular endothelial growth factor signaling pathway	GO:0038084	0.0556574	2	MYO1C,NRP1
M2	regulation of morphogenesis of an epithelium	GO:1905330	0.0610432	2	DVL2,SIRT6
M2	regulation of lipid storage	GO:0010883	0.0610432	2	PPARA,PPARG
M2	regulation of membrane depolarization	GO:0003254	0.0610432	2	SRC,SCN1B
M2	regulation of intrinsic apoptotic signaling pathway in response to DNA damage	GO:1902229	0.0610432	2	ZNF385A,CXCL12
M2	cellular response to organonitrogen compound	GO:0071417	0.0615366	5	IGFBP5,HCN2,ZFP36L1,AKT2,PPARG
M2	regulation of pri-miRNA transcription by RNA polymerase II	GO:1902893	0.0637894	2	PPARA,NFIB
M2	myeloid cell differentiation	GO:0030099	0.0668236	4	GATA2,HOXA5,PPARG,ZFP36L1
M2	cell-cell adhesion	GO:0098609	0.0669987	6	EGFR,PLXNB2,CDH24,CXCL12,PPARA,SRC
M2	cellular polysaccharide biosynthetic process	GO:0033692	0.0680399	2	AKT2,NDST1
M2	protein maturation	GO:0051604	0.0680399	4	APH1B,ECE1,ASPH,FURIN
M2	response to lipid	GO:0033993	0.0680399	6	MED14,EGFR,ZFP36L1,RARG,PPARA,PPARG
M2	regulation of erythrocyte differentiation	GO:0045646	0.0680399	2	HOXA5,ZFP36L1
M2	negative regulation of smooth muscle cell proliferation	GO:0048662	0.0680399	2	IGFBP5,PPARG
M2	cellular carbohydrate biosynthetic process	GO:0034637	0.0684488	2	AKT2,NDST1
M2	regulation of response to DNA damage stimulus	GO:2001020	0.0684488	4	ZNF385A,CXCL12,EGFR,SIRT6
M2	cellular response to peptide hormone stimulus	GO:0071375	0.0684577	3	AKT2,PPARG,ZFP36L1
M2	myeloid leukocyte differentiation	GO:0002573	0.0685617	3	GATA2,PPARG,ZFP36L1
M2	glycoprotein metabolic process	GO:0009100	0.0685617	4	GPC1,B4GALT1,NDST1,NECAB3
M2	intracellular receptor signaling pathway	GO:0030522	0.0685617	4	PPARA,MED14,PPARG,RARG
M2	regulation of gene silencing by miRNA	GO:0060964	0.0690651	2	EGFR,PPARG
M2	regulation of vascular smooth muscle cell proliferation	GO:1904705	0.0690651	2	IGFBP5,PPARG
M2	vascular smooth muscle cell proliferation	GO:1990874	0.0690651	2	IGFBP5,PPARG
M2	regulation of membrane potential	GO:0042391	0.0695127	4	AKT2,SRC,SCN1B,HCN2
M2	lipid localization	GO:0010876	0.0701841	4	AKT2,PPARA,ABCA12,PPARG
M2	mRNA 3'-end processing	GO:0031124	0.0714951	2	ZC3H3,ZFP36L1
M2	negative regulation of protein catabolic process	GO:0042177	0.0717155	3	EGFR,FURIN,HIPK2
M2	regulation of anion transport	GO:0044070	0.0727382	2	AKT2,RAB11B
M2	response to peptide hormone	GO:0043434	0.0727382	3	AKT2,PPARG,ZFP36L1
M2	gene silencing	GO:0016458	0.0727382	3	EGFR,SIRT6,PPARG
M2	regulation of gene silencing by RNA	GO:0060966	0.0727382	2	EGFR,PPARG
M2	regulation of posttranscriptional gene silencing	GO:0060147	0.0727382	2	EGFR,PPARG
M2	transmembrane receptor protein tyrosine kinase signaling pathway	GO:0007169	0.0747395	5	IGFBP5,MYO1C,EGFR,AKT2,NRP1
M2	negative regulation of myeloid cell differentiation	GO:0045638	0.0752201	2	HOXA5,ZFP36L1
M2	lipid storage	GO:0019915	0.0752201	2	PPARA,PPARG
M2	response to retinoic acid	GO:0032526	0.0752201	2	RARG,PPARG
M2	polysaccharide biosynthetic process	GO:0000271	0.0778836	2	AKT2,NDST1
M2	regulation of blood pressure	GO:0008217	0.0778836	2	ECE1,PPARG
M2	intrinsic apoptotic signaling pathway	GO:0097193	0.0778836	4	HIC1,CXCL12,SRC,ZNF385A
M2	cellular polysaccharide metabolic process	GO:0044264	0.0805179	2	AKT2,NDST1
M2	proteoglycan metabolic process	GO:0006029	0.0805179	2	GPC1,NDST1
M2	membrane depolarization	GO:0051899	0.0832126	2	SRC,SCN1B
M2	import into cell	GO:0098657	0.0834192	5	HCN2,LMBR1L,TUB,VLDLR,SRC
M2	regulation of mitochondrial membrane potential	GO:0051881	0.0836394	2	AKT2,SRC
M2	mRNA transport	GO:0051028	0.0836394	2	ZC3H3,ZFP36L1
M2	cellular response to vascular endothelial growth factor stimulus	GO:0035924	0.0836394	2	MYO1C,NRP1
M2	regulation of epithelial cell migration	GO:0010632	0.0836394	4	GATA2,SRC,PPARG,NRP1
M2	zymogen activation	GO:0031638	0.0858066	2	ASPH,FURIN
M2	regulation of JNK cascade	GO:0046328	0.0861763	3	DVL2,EGFR,HIPK2
M2	regulation of intrinsic apoptotic signaling pathway	GO:2001242	0.0861763	3	ZNF385A,CXCL12,SRC
M2	JNK cascade	GO:0007254	0.0921659	3	DVL2,EGFR,HIPK2
M2	polysaccharide metabolic process	GO:0005976	0.0935324	2	AKT2,NDST1
M2	regulation of generation of precursor metabolites and energy	GO:0043467	0.0935324	2	AKT2,PPARA
M2	cellular response to steroid hormone stimulus	GO:0071383	0.0935324	3	PPARA,MED14,ZFP36L1
M2	integrin-mediated signaling pathway	GO:0007229	0.0935324	2	SRC,NRP1
M2	carbohydrate metabolic process	GO:0005975	0.0965227	4	AKT2,PPARA,B4GALT1,NDST1
M2	negative regulation of immune system process	GO:0002683	0.0965227	4	HOXA5,CXCL12,PPARG,ZFP36L1
M2	cellular response to peptide	GO:1901653	0.0972512	3	AKT2,PPARG,ZFP36L1
M2	regulation of gene expression, epigenetic	GO:0040029	0.0972512	3	PPARG,EGFR,SIRT6
M2	erythrocyte differentiation	GO:0030218	0.0972512	2	HOXA5,ZFP36L1
M2	negative regulation of leukocyte cell-cell adhesion	GO:1903038	0.0972512	2	PPARA,CXCL12
M2	positive regulation of epithelial cell migration	GO:0010634	0.0986305	3	GATA2,SRC,NRP1
M2	RNA 3'-end processing	GO:0031123	0.0995815	2	ZC3H3,ZFP36L1
M3	RNA phosphodiester bond hydrolysis, exonucleolytic	GO:0090503	0.0419588	2	CNOT6,DCP2
M3	transforming growth factor beta receptor signaling pathway	GO:0007179	0.0494928	3	ADAM9,TWSG1,SMURF2
M3	cellular response to biotic stimulus	GO:0071216	0.0532889	3	ADAM9,TXNIP,MTDH
M3	epithelial cell differentiation	GO:0030855	0.0535786	4	ADAM9,TXNIP,PRKX,TJP2
M3	fat cell differentiation	GO:0045444	0.0635857	2	OSBPL8,ASXL2
M3	ribonucleoprotein complex assembly	GO:0022618	0.0659047	3	CNOT6,SRPK2,ZNHIT6
M3	cellular response to transforming growth factor beta stimulus	GO:0071560	0.0677673	3	ADAM9,TWSG1,SMURF2
M3	regulation of G2/M transition of mitotic cell cycle	GO:0010389	0.0680399	2	FOXN3,VPS4B
M3	ribonucleoprotein complex subunit organization	GO:0071826	0.0680399	3	CNOT6,SRPK2,ZNHIT6
M3	response to transforming growth factor beta	GO:0071559	0.0680586	3	ADAM9,TWSG1,SMURF2
M3	positive regulation of multi-organism process	GO:0043902	0.0680586	3	SRPK2,VPS4B,SMURF2
M3	keratinocyte differentiation	GO:0030216	0.0684488	2	ADAM9,TXNIP
M3	Notch signaling pathway	GO:0007219	0.0685617	2	MAML1,RBPJ
M3	positive regulation of organelle assembly	GO:1902117	0.0697263	2	CNOT6,VPS4B
M3	regulation of protein ubiquitination	GO:0031396	0.0725548	3	BMI1,SPOPL,UBE2D1
M3	epidermal cell differentiation	GO:0009913	0.0781368	2	ADAM9,TXNIP
M3	positive regulation of viral life cycle	GO:1903902	0.0805179	2	VPS4B,SRPK2
M3	ubiquitin-dependent protein catabolic process	GO:0006511	0.0833323	4	SPOPL,UBE2D1,VPS4B,SMURF2
M3	response to calcium ion	GO:0051592	0.0836394	2	AHCYL1,ADAM9
M3	regulation of cell cycle G2/M phase transition	GO:1902749	0.0836394	2	FOXN3,VPS4B
M3	modification-dependent protein catabolic process	GO:0019941	0.0836394	4	SPOPL,UBE2D1,VPS4B,SMURF2
M3	regulation of protein modification by small protein conjugation or removal	GO:1903320	0.0858066	3	BMI1,SPOPL,UBE2D1
M3	modification-dependent macromolecule catabolic process	GO:0043632	0.0858066	4	SPOPL,UBE2D1,VPS4B,SMURF2
M3	nuclear-transcribed mRNA catabolic process	GO:0000956	0.0858066	2	CNOT6,DCP2
M3	peptidyl-serine phosphorylation	GO:0018105	0.0867842	3	RPS6KA5,PRKX,PAK2
M3	transmembrane receptor protein serine/threonine kinase signaling pathway	GO:0007178	0.0867842	3	ADAM9,TWSG1,SMURF2
M3	regulation of multi-organism process	GO:0043900	0.08875	4	ELMOD2,VPS4B,SRPK2,SMURF2
M3	activation of protein kinase activity	GO:0032147	0.0887541	3	ADAM9,WNK1,PAK2
M3	inorganic anion transmembrane transport	GO:0098661	0.090976	2	SLC26A2,WNK1
M3	G2/M transition of mitotic cell cycle	GO:0000086	0.0938285	2	FOXN3,VPS4B
M3	positive regulation of DNA binding transcription factor activity	GO:0051091	0.0938285	3	MTDH,STK3,RPS6KA5
M3	peptidyl-serine modification	GO:0018209	0.0965227	3	RPS6KA5,PRKX,PAK2
M3	epidermis development	GO:0008544	0.099199	2	ADAM9,TXNIP
M3	epithelium development	GO:0060429	0.0995815	4	ADAM9,TXNIP,PRKX,TJP2
SOURCE	TARGET	WEIGHT
RPL9	RPS13	0.900816
RPL9	RPL11	0.883591
RPL15	RPS13	0.815292
RFC3	MSH2	0.713612
ZNF148	OSBPL8	0.703912
EXOSC8	MTHFD2	0.701617
ZNF148	SMAD5	0.68115
PPP1CC	GLO1	0.675129
RECQL	AIDA	0.666693
RPL15	SLC25A5	0.655811
TMPO	LMNB1	0.638617
QKI	SMURF2	0.633998
PHB	APEX1	0.624901
TCF12	BMI1	0.616337
DR1	TMED5	0.608281
HNRNPF	MSH2	0.587122
RFC3	EXO1	0.581429
MRPL18	UBE2N	0.579526
SERP1	TMED5	0.575655
MRPL18	TSN	0.570877
COX7B	SLC25A5	0.563805
MSH2	HLTF	0.5571
EFR3A	SGMS1	0.554146
EXOSC8	SNRPE	0.544778
FRYL	YWHAB	0.533663
BAZ1A	CD2AP	0.533405
SERP1	MTHFD2	0.5307
ZNF148	TMF1	0.529985
UBE2N	DR1	0.527628
CTDSP2	FOXN3	0.519346
EFR3A	DPY19L4	0.518919
PHB	CLPP	0.518614
DCP2	CD2AP	0.518157
DCP2	SUZ12	0.517517
NAB1	CBFB	0.515063
NEK2	EXO1	0.513249
TXNIP	ZFP36L2	0.511846
RFC3	WEE1	0.510656
UBE2D1	DR1	0.505012
NT5DC2	NME4	0.504371
TXNIP	DAZAP2	0.504279
CDH11	EFEMP2	0.503852
RBPJ	CASC3	0.502815
SAR1B	SERP1	0.500465
TCF12	CBFB	0.499107
SERP1	MTDH	0.498878
PPP1CC	MTDH	0.495308
TMED5	ADAM9	0.491555
RANBP1	SNRPE	0.491036
RECQL	EXOSC8	0.488779
VPS4B	BMI1	0.487772
BAZ1A	CBFB	0.485134
EGR1	NAB2	0.481613
ZNF148	FBXO21	0.480242
BMI1	ST13	0.477775
CALM3	YWHAB	0.476891
DCAF7	DYRK2	0.476754
PPP1CC	BMI1	0.473238
QKI	UBE2D1	0.472234
UBE2N	YWHAB	0.471656
NFIB	QKI	0.469573
ST13	HLTF	0.468494
MTDH	MTHFD2	0.465668
GIPC1	MYO1C	0.465121
VKORC1	NME4	0.465
RCC1	TMPO	0.464438
GLO1	LAPTM4B	0.463451
ANGPTL2	EFEMP2	0.461631
TCF12	PPP1CC	0.460387
EXO1	DTL	0.457538
EGR1	DUSP5	0.455418
QKI	YWHAB	0.453662
HNRNPF	EIF2S3	0.450608
SRPK2	TCF12	0.450095
TCF12	NREP	0.450034
HIPK2	WNK1	0.449974
MTDH	PAK2	0.446577
EGFR	SRC	0.446276
HNRNPF	AIDA	0.441048
UBE2N	BAG2	0.439424
MTDH	CBFB	0.436419
PPP1CC	RECQL	0.436299
BAZ1A	MTHFD2	0.435759
SS18	MSH2	0.433749
CTDSP2	QKI	0.433449
QKI	CBFB	0.432924
YBX1	APEX1	0.430454
CNN2	MYO1C	0.429885
TCF12	CNOT6	0.429347
AK2	UBE2N	0.429197
DCP2	PPP1CC	0.426986
QKI	FOXN3	0.426582
COX7B	SAR1B	0.425761
H3F3B	DAZAP2	0.425717
SUZ12	MSH2	0.425045
IGFBP5	CDH11	0.421812
SEC61A1	ELOVL1	0.419432
CCNI	FOXN3	0.418585
AKT2	RARG	0.418318
IGFBP5	EFEMP2	0.418303
PHB	GEMIN4	0.41541
ESRRA	FURIN	0.413366
MTDH	YWHAB	0.411532
YEATS4	EXOSC8	0.411502
TCF12	EXOSC8	0.410616
MTFR1	SAR1B	0.41035
PAK2	CBFB	0.404456
AIDA	TWSG1	0.404367
EGR1	BTG2	0.403868
GPC1	EFEMP2	0.403574
RECQL	SS18	0.403574
RECQL	MTHFD2	0.402135
RECQL	ZNHIT6	0.401636
NFIB	VLDLR	0.401255
RYK	SS18	0.400492
RECQL	CBFB	0.399335
RYK	TWSG1	0.398691
CBFB	RNF4	0.397594
EXOSC8	SUZ12	0.397185
FRYL	EFR3A	0.396484
ZBTB7B	RARG	0.395579
BTG2	ZFP36L2	0.394091
GLO1	HLTF	0.393887
MTFR1	EXOSC8	0.391762
RECQL	MSH2	0.391209
NFIB	CTDSPL	0.389655
H3F3B	TMSB10	0.389379
TSN	HLTF	0.38935
RFC3	HLTF	0.386944
FOXN3	TCF4	0.386076
UBE2N	HLTF	0.385728
KDELR3	EFEMP2	0.385266
RPL9	TMSB10	0.384572
NT5DC2	DBN1	0.383489
EXOSC8	HLTF	0.382984
CRKL	SP1	0.381774
IMPACT	DHX40	0.381658
FOXN3	ZFP36L2	0.380018
MTFR1	MTHFD2	0.379931
KDELR3	PPIC	0.379644
RFC3	RECQL	0.378897
MTDH	EXOSC8	0.377461
TMED5	BAG2	0.377261
SAR1B	ADAM9	0.377089
GLO1	ST13	0.377031
GEMIN4	CLPP	0.375155
RECQL	SNRPE	0.37464
RPS6KA5	FOXN3	0.374283
MTDH	TSN	0.374054
RPL11	TMSB10	0.373026
CORO1C	DR1	0.371941
TMSB10	RPS13	0.371371
CD2AP	MSH2	0.369606
NAB1	HLTF	0.369521
CTDSP2	CTDSPL	0.369322
DCP2	E2F3	0.368881
NFIB	LIMCH1	0.36827
DCP2	MSH2	0.368214
YEATS4	RECQL	0.368185
UBE2W	OSBPL8	0.366937
ST13	LAPTM4B	0.36569
AK2	PAK2	0.36494
CORO1C	AIDA	0.363625
SAR1B	DR1	0.363371
CTDSP2	TXNIP	0.363032
UBE2N	MED27	0.362891
PDLIM2	ELOVL1	0.362623
SUZ12	CBFB	0.362411
LMBR1L	CACFD1	0.362256
NME4	CLPP	0.361904
MTDH	SNRPE	0.361566
MTHFD2	PAK2	0.360749
DR1	CD2AP	0.359905
H3F3B	RNF4	0.359638
SAR1B	EXOSC8	0.358023
GPD2	SS18	0.356383
CTDSP2	MAML1	0.356061
EIF2S3	PAK2	0.355726
RPL15	TMSB10	0.355446
MTFR1	HLTF	0.355138
SMAD5	SLC26A2	0.354635
QKI	CDH11	0.354579
SEC61A1	PDIA5	0.354077
TMED5	ZNF24	0.35356
TSN	ZNHIT6	0.353477
MSH2	NXT2	0.352557
AIDA	BAG2	0.35218
DCP2	UBE2N	0.351735
UGP2	GLO1	0.351318
YWHAB	DAZAP2	0.350928
ECE1	EFEMP2	0.349886
MTDH	UBE2W	0.349734
TUB	RARG	0.349595
SS18	HIPK3	0.349206
PPP1CC	HLTF	0.348319
PPP1CC	DHX40	0.347904
ELOVL1	SZRD1	0.347599
SAR1B	UBE2D1	0.347544
MTDH	MSH2	0.347322
G6PC3	PDIA5	0.346838
RGL2	CTDSP2	0.346244
QKI	E2F3	0.346147
SP1	HIPK3	0.345664
HLTF	APEX1	0.345498
CTDSP2	DAZAP2	0.345139
AK2	SZRD1	0.34507
SAR1B	MTHFD2	0.344946
KDM1A	APEX1	0.34445
KDELR3	PDIA5	0.344009
PPP1CC	TMED5	0.342386
RPL15	ST13	0.342276
SUZ12	SNRPE	0.341616
HIPK2	MYB	0.341383
SS18	NAB1	0.341013
H3F3B	RPL15	0.34019
UBE2N	SZRD1	0.339957
WBP1L	MAML1	0.339834
PTN	EFEMP2	0.339766
TRIM23	UBE2W	0.339588
RECQL	TSN	0.33904
PPP1CC	SUZ12	0.338193
PTGES2	CLPP	0.337838
UBE2N	NXT2	0.337783
CCNI	ST13	0.337783
TJP2	YWHAB	0.336828
AHCYL1	ST13	0.336228
PPP4C	TMSB10	0.336011
SLC6A9	RARG	0.335738
WEE1	CD2AP	0.33548
EXOSC8	CD2AP	0.335112
DCAF7	AGPAT3	0.334732
EGFR	GAB1	0.334107
PPIF	GEMIN4	0.333835
PPP1CC	QKI	0.3337
FRYL	NHLRC2	0.332263
NREP	TCF4	0.331856
QKI	DYRK2	0.330923
NEK2	PSMC3IP	0.330856
SMAD5	TRIM23	0.330829
E2F3	BAZ1A	0.330775
RECQL	BAG2	0.330424
MTDH	DR1	0.330383
SMAD5	UBE2W	0.330167
PPP1CC	CNOT6	0.32929
IGFBP5	NOVA1	0.327325
SMURF2	SKIL	0.326962
MTHFD2	CD2AP	0.326949
GPC1	PLXNB2	0.326613
DHX40	PAIP2	0.325969
MTFR1	MTDH	0.325634
MTDH	GLO1	0.324375
SAR1B	TMED5	0.324188
RPL15	CCNI	0.323734
ESRRA	NECAB3	0.322266
TCF12	TJP2	0.321466
ESRRA	PDE4A	0.320628
SNAPC1	BAZ1A	0.319075
IGFBP5	ACTA2	0.318266
LITAF	BTG2	0.316587
SERP1	NXT2	0.314886
WBP1L	CTDSP2	0.311145
PPARA	MYO1C	0.309564
RECQL	RRM2B	0.308919
SERP1	SSR3	0.304953
MXRA7	EFEMP2	0.304448
RGL2	CTDSPL	0.303454
BMI1	ICK	0.303299
CXCL12	CDH11	0.300636
HIPK2	MYO1C	0.29929
SDR39U1	APEX1	0.298319
ZNF148	WNK1	0.297132
CTDSP2	ZFP36L2	0.296635
QKI	STK3	0.295884
TCF12	MAML1	0.293816
RNPEPL1	EFEMP2	0.292993
RGL2	DVL2	0.290358
TCFL5	HLTF	0.289453
DUSP5	BTG2	0.287449
NRP1	EFEMP2	0.285789
AKT2	RAB11B	0.285415
DEPDC1B	DTL	0.285042
METTL9	RPL15	0.282128
NRP1	ASPH	0.280733
GPC1	DBN1	0.276757
HNRNPF	TAF12	0.275428
ATL3	CORO1C	0.27426
MYB	E2F7	0.273826
MED14	SHROOM2	0.270932
CORO1C	CRKL	0.270667
CNOT6	SREK1IP1	0.267797
ZNF148	ZNF652	0.267629
ESRRA	NDST1	0.26745
TULP3	HIPK2	0.267342
B4GALT1	PPARA	0.26724
GATA2	FURIN	0.264174
MEGF9	FOXN3	0.26215
OSBP2	PDE4A	0.259855
MRPL18	TXNDC17	0.259585
SPOPL	DPY19L4	0.257356
BCORL1	GATA2	0.257315
APPL2	DAZAP2	0.255837
CALM3	CLPP	0.254491
MITF	NFIB	0.253508
ZNF148	ASXL2	0.252654
DCAF7	SZRD1	0.250643
CDCA7L	DTL	0.245373
RAB11B	SIRT6	0.244346
PRKX	FOXN3	0.242547
DCP2	UBR1	0.240448
ESRRA	SLC1A5	0.240133
ESCO2	DTL	0.239733
HCN2	SRC	0.23951
KLF15	TUB	0.239066
TUB	DPF3	0.238456
GAB1	HIPK3	0.23736
CTDSP2	NEK9	0.237349
VPS4B	USP38	0.23416
NRP1	HOXA5	0.233854
AKT2	HIC1	0.233307
ASPH	ALDH4A1	0.232827
RFC3	TRMT6	0.231353
CDH24	BCORL1	0.22987
HIPK2	SNTB2	0.229432
EGFR	SLC7A2	0.228742
ESRRA	NAB2	0.227882
PTGES2	PPP1R14B	0.227544
RPS13	PDCD6	0.225454
GPCPD1	SPOPL	0.225113
GXYLT1	DPY19L4	0.224257
SPTLC2	SP1	0.223509
E2F3	ADNP2	0.223361
SFXN2	LMNB1	0.221914
CTSF	EFEMP2	0.220683
TFEB	BCORL1	0.219207
IMPACT	GPAM	0.218586
PDLIM2	PLXNB2	0.217215
CCNI	ZFP36L2	0.215459
CYB5R4	UBE2N	0.21191
FXYD6	EFEMP2	0.20993
PDE4A	FAM78A	0.208304
SOX8	MYRF	0.207224
ELMOD2	DPY19L4	0.206024
ESRRA	SCN1B	0.205899
EGFR	EYA4	0.205381
B4GALT1	SYT7	0.204175
ZBTB7B	EFNA2	0.203396
PCGF6	MSH2	0.20299
EGFR	ZFP36L1	0.202251
NECAB3	ZC3H3	0.201975
STIM2	NAB1	0.201695
RSBN1L	CNOT6	0.200557
UBE2F	MTHFD2	0.200303
ESRRA	AGPAT3	0.199546
PPIF	BID	0.199429
G6PC3	SLC35A4	0.199113
EGFR	APLNR	0.195282
SPTLC2	RAB27A	0.194564
PDLIM2	EHBP1L1	0.194477
SPHK2	ESRRA	0.193809
GJC1	EGFR	0.19261
ABCA12	EGFR	0.191219
ZNF385A	ZBTB7B	0.18756
LIMCH1	PDLIM3	0.187481
C4orf46	GEMIN4	0.187434
TWSG1	FBXO33	0.187109
DUSP4	SKIL	0.186608
SPTLC2	GPD2	0.18479
DIRAS1	PDE4A	0.180716
GIPC1	NAT8L	0.18016
FAM126B	UBE2W	0.180021
PDE4A	NEFH	0.179868
PHGDH	NME4	0.179301
ESRRA	CPT1A	0.178011
SLC39A13	VLDLR	0.177085
DBN1	SLC9A3R2	0.176383
AIF1L	CTDSPL	0.176232
MDFI	EGFR	0.175692
SYT7	MSI1	0.174973
FAM126B	TMEM170A	0.173196
KIAA1147	RSBN1L	0.172978
UBE2N	UBLCP1	0.17139
TMF1	JMY	0.171212
SLC39A13	JDP2	0.169866
MED14	SCD5	0.169204
PPP4R2	UBE2W	0.16881
ABHD5	SPTLC2	0.167784
MED11	CLPP	0.163942
FAM126B	SPTY2D1	0.162835
PDE4A	SLC43A2	0.158548
NUP43	TSN	0.155282
SMIM14	SNTB2	0.153482
GLIS2	NAB2	0.153224
EN1	EGFR	0.153078
TUB	CLDN11	0.152485
PYGO1	EFNA2	0.151761
SMAD9	PDE4A	0.151204
CPLX1	ECE1	0.151086
EGR1	SKIL	0.150586
SCD5	NCAM2	0.150149
VSIG10	SNTB2	0.146483
SOX8	RCOR2	0.145697
UNC93B1	EHBP1L1	0.14524
NAT8L	ZSWIM4	0.143264
PDE4A	FAM222A	0.142478
TMEFF1	UBE2W	0.142332
NAT8L	PKDCC	0.140612
DCAF7	SNX12	0.139983
NAT8L	NKAIN1	0.137929
NAT8L	ARHGAP42	0.13539
MBD6	ZBTB7B	0.133105
SYT7	BEND4	0.132008
NRP1	PPARG	0.130746
TUB	VASH2	0.126579
SKIL	CCDC85C	0.12625
OSGEP	SNX12	0.123559
UGP2	SAR1B	0.118452
APH1B	SLC39A13	0.106472
CACFD1	C6orf47	0.103593
PLXNB2	MLC1	0.103229
IGFBP5	SLC47A1	0.0998781
NAT8L	MBNL3	0.0868059
UGP2	PCTP	0.0802784
POGLUT1	SEC22A	0.0667228
EGR1	PELI2	0.060879
FUNDC1	SEC22A	0.0379269
USP36	CD83	0.0301761
