# Supplementary material for: Synergism of Pro-neurogenic miRNAs&nbsp;Provides a More Effective Strategy to Target Glioma Stem Cells
Source: Research Square preprint supplement (doi:10.21203/rs.3.rs-125940/v1), 2020-12-15
Supplement: Supplementary file 3 [file 40eed3bf8b0b5ffcba55c8ca.xlsx]

## Sheet: DOWN_OVERLAP2
Ensembl ID	Gene Symbol	DOWN_1919	DOWN_3565	DOWN_BE2C	Sum Down	GENE_TYPE	Log2FC_GBMvsGTEx	FC_Stage1vsStage4	miR-124	miR-128	miR-137	Sum miRs
ENSG00000175215	CTDSP2	1	1	1	3	protein_coding	1.01861	#N/A	1	1	1	3
ENSG00000140564	FURIN	1	1	1	3	protein_coding	0	#N/A	1	1	1	3
ENSG00000147862	NFIB	1	1	1	3	protein_coding	0	#N/A	1	1	1	3
ENSG00000148411	NACC2	1	1	1	3	protein_coding	0	#N/A	1	1	1	3
ENSG00000101888	NXT2	1	1	1	3	protein_coding	1.89679	1.12971	1	1	1	3
ENSG00000011198	ABHD5	1	1	1	3	protein_coding	2.46195	1.04892	1	1	1	3
ENSG00000100596	SPTLC2	1	1	1	3	protein_coding	0	1.039	1	1	1	3
ENSG00000099942	CRKL	1	1	1	3	protein_coding	0	1.03105	1	1	1	3
ENSG00000214357	NEURL1B	1	1	1	3	protein_coding	0	-1.01621	1	1	1	3
ENSG00000115159	GPD2	1	1	1	3	protein_coding	0	-1.02197	1	1	1	3
ENSG00000196628	TCF4	1	1	1	3	protein_coding	0	-1.02625	1	1	1	3
ENSG00000112531	QKI	1	1	1	3	protein_coding	0	-1.05683	1	1	1	3
ENSG00000152518	ZFP36L2	0	1	1	2	protein_coding	2.12711	#N/A	1	1	1	3
ENSG00000154639	CXADR	1	0	1	2	protein_coding	1.01958	#N/A	1	1	1	3
ENSG00000126882	FAM78A	1	1	0	2	protein_coding	0	#N/A	1	1	1	3
ENSG00000070614	NDST1	1	0	1	2	protein_coding	0	#N/A	1	1	1	3
ENSG00000108854	SMURF2	1	0	1	2	protein_coding	0	#N/A	1	1	1	3
ENSG00000147649	MTDH	0	1	1	2	protein_coding	0	#N/A	1	1	1	3
ENSG00000151233	GXYLT1	0	1	1	2	protein_coding	0	#N/A	1	1	1	3
ENSG00000165406	43898	1	0	1	2	protein_coding	0	#N/A	1	1	1	3
ENSG00000177374	HIC1	1	1	0	2	protein_coding	0	#N/A	1	1	1	3
ENSG00000257093	KIAA1147	0	1	1	2	protein_coding	0	#N/A	1	1	1	3
ENSG00000119927	GPAM	0	1	1	2	protein_coding	-1.06881	#N/A	1	1	1	3
ENSG00000131323	TRAF3	0	1	1	2	protein_coding	-1.46703	#N/A	1	1	1	3
ENSG00000179119	SPTY2D1	0	1	1	2	protein_coding	0	1.06382	1	1	1	3
ENSG00000185591	SP1	1	1	0	2	protein_coding	0	1.01959	1	1	1	3
ENSG00000144677	CTDSPL	1	1	0	2	protein_coding	0	-1.03052	1	1	1	3
ENSG00000162738	VANGL2	1	1	1	3	protein_coding	2.11397	#N/A	1	1	0	2
ENSG00000134247	PTGFRN	1	1	1	3	protein_coding	2.08718	#N/A	0	1	1	2
ENSG00000128791	TWSG1	1	1	1	3	protein_coding	2.07022	#N/A	1	0	1	2
ENSG00000104341	LAPTM4B	1	1	1	3	protein_coding	1.63297	#N/A	0	1	1	2
ENSG00000132475	H3F3B	1	1	1	3	protein_coding	1.01887	#N/A	0	1	1	2
ENSG00000003989	SLC7A2	1	1	1	3	protein_coding	0	#N/A	1	0	1	2
ENSG00000004975	DVL2	1	1	1	3	protein_coding	0	#N/A	0	1	1	2
ENSG00000114999	TTL	1	1	1	3	protein_coding	0	#N/A	1	0	1	2
ENSG00000117174	ZNHIT6	1	1	1	3	protein_coding	0	#N/A	1	0	1	2
ENSG00000119139	TJP2	1	1	1	3	protein_coding	0	#N/A	1	0	1	2
ENSG00000120742	SERP1	1	1	1	3	protein_coding	0	#N/A	1	0	1	2
ENSG00000126603	GLIS2	1	1	1	3	protein_coding	0	#N/A	1	0	1	2
ENSG00000135093	USP30	1	1	1	3	protein_coding	0	#N/A	1	0	1	2
ENSG00000141380	SS18	1	1	1	3	protein_coding	0	#N/A	0	1	1	2
ENSG00000142327	RNPEPL1	1	1	1	3	protein_coding	0	#N/A	1	1	0	2
ENSG00000149679	CABLES2	1	1	1	3	protein_coding	0	#N/A	0	1	1	2
ENSG00000154059	IMPACT	1	1	1	3	protein_coding	0	#N/A	1	0	1	2
ENSG00000160216	AGPAT3	1	1	1	3	protein_coding	0	#N/A	0	1	1	2
ENSG00000161642	ZNF385A	1	1	1	3	protein_coding	0	#N/A	0	1	1	2
ENSG00000162437	RAVER2	1	1	1	3	protein_coding	0	#N/A	1	0	1	2
ENSG00000176834	VSIG10	1	1	1	3	protein_coding	0	#N/A	1	0	1	2
ENSG00000187098	MITF	1	1	1	3	protein_coding	0	#N/A	1	0	1	2
ENSG00000196865	NHLRC2	1	1	1	3	protein_coding	0	#N/A	1	0	1	2
ENSG00000198087	CD2AP	1	1	1	3	protein_coding	0	#N/A	0	1	1	2
ENSG00000249915	PDCD6	1	1	1	3	protein_coding	0	#N/A	1	0	1	2
ENSG00000165355	FBXO33	1	1	1	3	protein_coding	-1.25491	#N/A	0	1	1	2
ENSG00000064393	HIPK2	1	1	1	3	protein_coding	-1.76561	#N/A	1	1	0	2
ENSG00000117650	NEK2	1	1	1	3	protein_coding	2.86535	1.19158	0	1	1	2
ENSG00000163884	KLF15	1	1	1	3	protein_coding	0	1.16137	1	0	1	2
ENSG00000092621	PHGDH	1	1	1	3	protein_coding	0	1.09306	0	1	1	2
ENSG00000182963	GJC1	1	1	1	3	protein_coding	1.32853	1.08719	1	0	1	2
ENSG00000105948	TTC26	1	1	1	3	protein_coding	1.49699	1.06831	1	0	1	2
ENSG00000135097	MSI1	1	1	1	3	protein_coding	1.26366	1.05765	0	1	1	2
ENSG00000176087	SLC35A4	1	1	1	3	protein_coding	0	1.05433	1	0	1	2
ENSG00000131174	COX7B	1	1	1	3	protein_coding	0	1.05224	0	1	1	2
ENSG00000153944	MSI2	1	1	1	3	protein_coding	0	1.05111	0	1	1	2
ENSG00000163785	RYK	1	1	1	3	protein_coding	1.01387	1.04159	1	0	1	2
ENSG00000113368	LMNB1	1	1	1	3	protein_coding	3.45906	1.03793	0	1	1	2
ENSG00000184743	ATL3	1	1	1	3	protein_coding	1.20314	1.03756	1	1	0	2
ENSG00000156531	PHF6	1	1	1	3	protein_coding	0	1.03372	1	1	0	2
ENSG00000139921	TMX1	1	1	1	3	protein_coding	2.24183	1.03208	0	1	1	2
ENSG00000170185	USP38	1	1	1	3	protein_coding	1.05724	1.03165	1	0	1	2
ENSG00000108179	PPIF	1	1	1	3	protein_coding	0	1.03101	1	1	0	2
ENSG00000139433	GLTP	1	1	1	3	protein_coding	0	1.02809	1	1	0	2
ENSG00000089195	TRMT6	1	1	1	3	protein_coding	0	1.02779	1	0	1	2
ENSG00000163605	PPP4R2	1	1	1	3	protein_coding	0	1.02469	0	1	1	2
ENSG00000163389	POGLUT1	1	1	1	3	protein_coding	0	1.02228	1	1	0	2
ENSG00000180182	MED14	1	1	1	3	protein_coding	0	1.01913	0	1	1	2
ENSG00000105221	AKT2	1	1	1	3	protein_coding	0	1.01164	1	0	1	2
ENSG00000112062	MAPK14	1	1	1	3	protein_coding	0	-1.00986	1	1	0	2
ENSG00000060237	WNK1	1	1	1	3	protein_coding	0	-1.01135	1	1	0	2
ENSG00000053254	FOXN3	1	1	1	3	protein_coding	0	-1.01262	0	1	1	2
ENSG00000198964	SGMS1	1	1	1	3	protein_coding	0	-1.019	1	1	0	2
ENSG00000166224	SGPL1	1	1	1	3	protein_coding	0	-1.02237	1	0	1	2
ENSG00000166402	TUB	1	1	1	3	protein_coding	-1.94169	-1.02693	1	1	0	2
ENSG00000119541	VPS4B	1	1	1	3	protein_coding	0	-1.02762	1	1	0	2
ENSG00000117500	TMED5	1	1	1	3	protein_coding	1.65883	-1.02771	0	1	1	2
ENSG00000113595	TRIM23	1	1	1	3	protein_coding	0	-1.03488	0	1	1	2
ENSG00000132294	EFR3A	1	1	1	3	protein_coding	-1.21969	-1.03532	0	1	1	2
ENSG00000117298	ECE1	1	1	1	3	protein_coding	0	-1.05623	1	1	0	2
ENSG00000146648	EGFR	1	1	1	3	protein_coding	5.10146	-1.06558	0	1	1	2
ENSG00000176490	DIRAS1	1	1	1	3	protein_coding	-2.28579	-1.08529	0	1	1	2
ENSG00000099617	EFNA2	1	1	0	2	protein_coding	1.42423	#N/A	0	1	1	2
ENSG00000113658	SMAD5	1	1	0	2	protein_coding	1.20729	#N/A	1	1	0	2
ENSG00000104343	UBE2W	0	1	1	2	protein_coding	0	#N/A	1	1	0	2
ENSG00000110422	HIPK3	1	1	0	2	protein_coding	0	#N/A	1	1	0	2
ENSG00000112208	BAG2	1	1	0	2	protein_coding	0	#N/A	0	1	1	2
ENSG00000143970	ASXL2	1	1	0	2	protein_coding	0	#N/A	1	0	1	2
ENSG00000144426	NBEAL1	1	1	0	2	protein_coding	0	#N/A	0	1	1	2
ENSG00000145391	SETD7	1	1	0	2	protein_coding	0	#N/A	0	1	1	2
ENSG00000157657	ZNF618	1	0	1	2	protein_coding	0	#N/A	1	1	0	2
ENSG00000161021	MAML1	1	1	0	2	protein_coding	0	#N/A	1	0	1	2
ENSG00000163848	ZNF148	1	1	0	2	protein_coding	0	#N/A	1	0	1	2
ENSG00000172466	ZNF24	0	1	1	2	protein_coding	0	#N/A	0	1	1	2
ENSG00000178691	SUZ12	1	1	0	2	protein_coding	0	#N/A	0	1	1	2
ENSG00000211460	TSN	1	0	1	2	protein_coding	0	#N/A	1	0	1	2
ENSG00000064042	LIMCH1	1	0	1	2	protein_coding	-1.09644	#N/A	1	0	1	2
ENSG00000065989	PDE4A	1	1	0	2	protein_coding	-2.28127	#N/A	1	0	1	2
ENSG00000165891	E2F7	1	0	1	2	protein_coding	4.79978	1.10626	0	1	1	2
ENSG00000112242	E2F3	1	1	0	2	protein_coding	0	1.0802	1	1	0	2
ENSG00000185818	NAT8L	1	1	0	2	protein_coding	-2.52802	1.0695	1	0	1	2
ENSG00000205476	CCDC85C	1	0	1	2	protein_coding	0	1.056	0	1	1	2
ENSG00000165185	KIAA1958	1	1	0	2	protein_coding	0	1.04879	1	0	1	2
ENSG00000198740	ZNF652	1	1	0	2	protein_coding	0	1.04121	1	1	0	2
ENSG00000085185	BCORL1	1	1	0	2	protein_coding	0	1.03979	0	1	1	2
ENSG00000152700	SAR1B	1	1	0	2	protein_coding	0	1.03341	1	0	1	2
ENSG00000155850	SLC26A2	1	0	1	2	protein_coding	1.0635	1.03218	1	0	1	2
ENSG00000143494	VASH2	1	1	0	2	protein_coding	0	1.02701	0	1	1	2
ENSG00000004455	AK2	1	1	0	2	protein_coding	1.65977	1.02519	1	1	0	2
ENSG00000071564	TCF3	0	1	1	2	protein_coding	1.52458	1.01898	1	0	1	2
ENSG00000103365	GGA2	1	1	0	2	protein_coding	0	1.01201	1	1	0	2
ENSG00000136485	DCAF7	0	1	1	2	protein_coding	0	1.01156	1	1	0	2
ENSG00000091039	OSBPL8	1	1	0	2	protein_coding	0	-1.01583	1	0	1	2
ENSG00000196576	PLXNB2	1	0	1	2	protein_coding	0	-1.0169	1	0	1	2
ENSG00000184182	UBE2F	0	1	1	2	protein_coding	0	-1.01706	0	1	1	2
ENSG00000048392	RRM2B	1	1	0	2	protein_coding	0	-1.02098	1	0	1	2
ENSG00000151692	RNF144A	1	0	1	2	protein_coding	0	-1.02558	1	1	0	2
ENSG00000108349	CASC3	0	1	1	2	protein_coding	0	-1.02702	1	1	0	2
ENSG00000159388	BTG2	1	1	0	2	protein_coding	1.02371	-1.02966	1	1	0	2
ENSG00000140937	CDH11	0	1	1	2	protein_coding	1.9214	-1.03275	0	1	1	2
ENSG00000197879	MYO1C	0	1	1	2	protein_coding	0	-1.03525	1	0	1	2
ENSG00000112561	TFEB	0	1	1	2	protein_coding	0	-1.03556	1	1	0	2
ENSG00000134986	NREP	1	0	1	2	protein_coding	0	-1.04043	0	1	1	2
ENSG00000184792	OSBP2	1	0	1	2	protein_coding	-1.4725	-1.04069	1	0	1	2
ENSG00000139636	LMBR1L	1	0	1	2	protein_coding	0	-1.04072	0	1	1	2
ENSG00000155744	FAM126B	1	0	1	2	protein_coding	-1.82249	-1.05005	0	1	1	2
ENSG00000067955	CBFB	1	1	0	2	protein_coding	1.47631	-1.05429	1	1	0	2
ENSG00000144228	SPOPL	1	1	0	2	protein_coding	0	-1.05553	1	1	0	2
ENSG00000185650	ZFP36L1	1	1	0	2	protein_coding	0	-1.05827	1	1	0	2
ENSG00000138166	DUSP5	1	1	0	2	protein_coding	0	-1.05914	0	1	1	2
ENSG00000069974	RAB27A	1	0	1	2	protein_coding	1.17121	-1.05961	1	1	0	2
ENSG00000106004	HOXA5	1	1	0	2	protein_coding	7.91329	-1.06156	1	1	0	2
ENSG00000168916	ZNF608	1	1	0	2	protein_coding	0	-1.06696	1	1	0	2
ENSG00000099250	NRP1	0	1	1	2	protein_coding	1.61939	-1.08754	1	0	1	2
ENSG00000112319	EYA4	1	0	1	2	protein_coding	2.84019	-1.36089	1	1	0	2
ENSG00000065978	YBX1	1	1	1	3	protein_coding	2.47779	#N/A	0	0	1	1
ENSG00000004700	RECQL	1	1	1	3	protein_coding	2.41867	#N/A	0	0	1	1
ENSG00000150433	TMEM218	1	1	1	3	protein_coding	1.98842	#N/A	0	0	1	1
ENSG00000110057	UNC93B1	1	1	1	3	protein_coding	1.84567	#N/A	0	0	1	1
ENSG00000086062	B4GALT1	1	1	1	3	protein_coding	1.84077	#N/A	1	0	0	1
ENSG00000055070	SZRD1	1	1	1	3	protein_coding	1.83865	#N/A	0	1	0	1
ENSG00000165895	ARHGAP42	1	1	1	3	protein_coding	1.69118	#N/A	0	0	1	1
ENSG00000189067	LITAF	1	1	1	3	protein_coding	1.64686	#N/A	1	0	0	1
ENSG00000156162	DPY19L4	1	1	1	3	protein_coding	1.54453	#N/A	1	0	0	1
ENSG00000070831	CDC42	1	1	1	3	protein_coding	1.21621	#N/A	0	0	1	1
ENSG00000188428	BLOC1S5	1	1	1	3	protein_coding	1.20026	#N/A	0	1	0	1
ENSG00000161920	MED11	1	1	1	3	protein_coding	1.16091	#N/A	0	0	1	1
ENSG00000006459	KDM7A	1	1	1	3	protein_coding	0	#N/A	0	0	1	1
ENSG00000055483	USP36	1	1	1	3	protein_coding	0	#N/A	0	0	1	1
ENSG00000066322	ELOVL1	1	1	1	3	protein_coding	0	#N/A	0	0	1	1
ENSG00000071794	HLTF	1	1	1	3	protein_coding	0	#N/A	0	0	1	1
ENSG00000075539	FRYL	1	1	1	3	protein_coding	0	#N/A	0	1	0	1
ENSG00000078246	TULP3	1	1	1	3	protein_coding	0	#N/A	0	0	1	1
ENSG00000092094	OSGEP	1	1	1	3	protein_coding	0	#N/A	0	0	1	1
ENSG00000112149	CD83	1	1	1	3	protein_coding	0	#N/A	0	0	1	1
ENSG00000113300	CNOT6	1	1	1	3	protein_coding	0	#N/A	0	1	0	1
ENSG00000119977	TCTN3	1	1	1	3	protein_coding	0	#N/A	0	0	1	1
ENSG00000120253	NUP43	1	1	1	3	protein_coding	0	#N/A	0	0	1	1
ENSG00000124767	GLO1	1	1	1	3	protein_coding	0	#N/A	0	0	1	1
ENSG00000136044	APPL2	1	1	1	3	protein_coding	0	#N/A	0	0	1	1
ENSG00000138439	FAM117B	1	1	1	3	protein_coding	0	#N/A	0	0	1	1
ENSG00000142676	RPL11	1	1	1	3	protein_coding	0	#N/A	0	0	1	1
ENSG00000153006	SREK1IP1	1	1	1	3	protein_coding	0	#N/A	1	0	0	1
ENSG00000156374	PCGF6	1	1	1	3	protein_coding	0	#N/A	0	0	1	1
ENSG00000159423	ALDH4A1	1	1	1	3	protein_coding	0	#N/A	0	1	0	1
ENSG00000164332	UBLCP1	1	1	1	3	protein_coding	0	#N/A	0	0	1	1
ENSG00000166272	WBP1L	1	1	1	3	protein_coding	0	#N/A	0	1	0	1
ENSG00000166831	RBPMS2	1	1	1	3	protein_coding	0	#N/A	0	1	0	1
ENSG00000167771	RCOR2	1	1	1	3	protein_coding	0	#N/A	0	0	1	1
ENSG00000168214	RBPJ	1	1	1	3	protein_coding	0	#N/A	0	0	1	1
ENSG00000168710	AHCYL1	1	1	1	3	protein_coding	0	#N/A	0	0	1	1
ENSG00000171016	PYGO1	1	1	1	3	protein_coding	0	#N/A	0	0	1	1
ENSG00000174080	CTSF	1	1	1	3	protein_coding	0	#N/A	0	0	1	1
ENSG00000183943	PRKX	1	1	1	3	protein_coding	0	#N/A	0	1	0	1
ENSG00000198363	ASPH	1	1	1	3	protein_coding	0	#N/A	0	0	1	1
ENSG00000124920	MYRF	1	1	1	3	protein_coding	-1.51906	#N/A	1	0	0	1
ENSG00000160014	CALM3	1	1	1	3	protein_coding	-2.0501	#N/A	0	0	1	1
ENSG00000162878	PKDCC	1	1	1	3	protein_coding	-2.15417	#N/A	0	0	1	1
ENSG00000171320	ESCO2	1	1	1	3	protein_coding	5.75074	1.13701	0	0	1	1
ENSG00000105281	SLC1A5	1	1	1	3	protein_coding	3.87888	1.13597	0	0	1	1
ENSG00000143476	DTL	1	1	1	3	protein_coding	5.82332	1.13264	0	0	1	1
ENSG00000035499	DEPDC1B	1	1	1	3	protein_coding	3.38307	1.11518	0	1	0	1
ENSG00000156398	SFXN2	1	1	1	3	protein_coding	0	1.09929	0	1	0	1
ENSG00000205208	C4orf46	1	1	1	3	protein_coding	1.63583	1.08751	1	0	0	1
ENSG00000166483	WEE1	1	1	1	3	protein_coding	4.26363	1.07811	0	1	0	1
ENSG00000180198	RCC1	1	1	1	3	protein_coding	2.07451	1.07696	0	0	1	1
ENSG00000103202	NME4	1	1	1	3	protein_coding	0	1.07154	1	0	0	1
ENSG00000182004	SNRPE	1	1	1	3	protein_coding	1.98526	1.06348	0	0	1	1
ENSG00000173457	PPP1R14B	1	1	1	3	protein_coding	2.08544	1.05317	0	0	1	1
ENSG00000014164	ZC3H3	1	1	1	3	protein_coding	0	1.04995	0	0	1	1
ENSG00000167397	VKORC1	1	1	1	3	protein_coding	1.98324	1.04965	0	0	1	1
ENSG00000167085	PHB	1	1	1	3	protein_coding	1.78522	1.04687	0	1	0	1
ENSG00000164649	CDCA7L	1	1	1	3	protein_coding	3.75998	1.04617	0	0	1	1
ENSG00000100823	APEX1	1	1	1	3	protein_coding	1.08079	1.04504	0	1	0	1
ENSG00000120875	DUSP4	1	1	1	3	protein_coding	1.12262	1.04481	0	0	1	1
ENSG00000123159	GIPC1	1	1	1	3	protein_coding	0	1.04416	0	0	1	1
ENSG00000005022	SLC25A5	1	1	1	3	protein_coding	0	1.04355	0	0	1	1
ENSG00000173153	ESRRA	1	1	1	3	protein_coding	0	1.04325	0	0	1	1
ENSG00000160563	MED27	1	1	1	3	protein_coding	0	1.04138	0	0	1	1
ENSG00000058262	SEC61A1	1	1	1	3	protein_coding	1.9625	1.03894	0	1	0	1
ENSG00000177889	UBE2N	1	1	1	3	protein_coding	0	1.03631	0	1	0	1
ENSG00000139880	CDH24	1	1	1	3	protein_coding	0	1.03528	0	1	0	1
ENSG00000116157	GPX7	1	1	1	3	protein_coding	3.08798	1.03222	0	0	1	1
ENSG00000077463	SIRT6	1	1	1	3	protein_coding	0	1.03134	0	0	1	1
ENSG00000110700	RPS13	1	1	1	3	protein_coding	1.24652	1.03095	0	0	1	1
ENSG00000108406	DHX40	1	1	1	3	protein_coding	1.7148	1.03031	0	0	1	1
ENSG00000149923	PPP4C	1	1	1	3	protein_coding	1.8258	1.02849	0	1	0	1
ENSG00000101544	ADNP2	1	1	1	3	protein_coding	0	1.02628	1	0	0	1
ENSG00000197122	SRC	1	1	1	3	protein_coding	0	1.02576	0	0	1	1
ENSG00000125656	CLPP	1	1	1	3	protein_coding	1.18208	1.02429	0	1	0	1
ENSG00000100422	CERK	1	1	1	3	protein_coding	0	1.02346	0	0	1	1
ENSG00000141179	PCTP	1	1	1	3	protein_coding	0	1.0223	0	0	1	1
ENSG00000141349	G6PC3	1	1	1	3	protein_coding	1.27322	1.02145	0	1	0	1
ENSG00000119812	FAM98A	1	1	1	3	protein_coding	0	1.02105	0	0	1	1
ENSG00000065615	CYB5R4	1	1	1	3	protein_coding	0	1.02047	0	0	1	1
ENSG00000129235	TXNDC17	1	1	1	3	protein_coding	1.92859	1.02033	0	0	1	1
ENSG00000119711	ALDH6A1	1	1	1	3	protein_coding	-1.8898	1.01491	1	0	0	1
ENSG00000112110	MRPL18	1	1	1	3	protein_coding	0	1.01384	0	0	1	1
ENSG00000163682	RPL9	1	1	1	3	protein_coding	0	1.01012	0	0	1	1
ENSG00000166913	YWHAB	1	1	1	3	protein_coding	0	-1.0145	0	1	0	1
ENSG00000144455	SUMF1	1	1	1	3	protein_coding	1.40434	-1.0147	1	0	0	1
ENSG00000034510	TMSB10	1	1	1	3	protein_coding	1.12047	-1.0183	0	1	0	1
ENSG00000140262	TCF12	1	1	1	3	protein_coding	2.32923	-1.01848	0	0	1	1
ENSG00000135108	FBXO21	1	1	1	3	protein_coding	0	-1.01902	0	1	0	1
ENSG00000168283	BMI1	1	1	1	3	protein_coding	0	-1.01917	0	1	0	1
ENSG00000106780	MEGF9	1	1	1	3	protein_coding	0	-1.021	0	0	1	1
ENSG00000157191	NECAP2	1	1	1	3	protein_coding	1.78718	-1.02159	1	0	0	1
ENSG00000138386	NAB1	1	1	1	3	protein_coding	0	-1.02193	0	0	1	1
ENSG00000120727	PAIP2	1	1	1	3	protein_coding	0	-1.02205	0	1	0	1
ENSG00000135250	SRPK2	1	1	1	3	protein_coding	0	-1.02344	0	1	0	1
ENSG00000100784	RPS6KA5	1	1	1	3	protein_coding	-1.43475	-1.0245	0	1	0	1
ENSG00000169764	UGP2	1	1	1	3	protein_coding	-1.42929	-1.0248	0	0	1	1
ENSG00000104081	BMF	1	1	1	3	protein_coding	2.82407	-1.02921	1	0	0	1
ENSG00000104375	STK3	1	1	1	3	protein_coding	0	-1.03247	0	0	1	1
ENSG00000265972	TXNIP	1	1	1	3	protein_coding	0	-1.03546	0	1	0	1
ENSG00000109458	GAB1	1	1	1	3	protein_coding	0	-1.043	0	1	0	1
ENSG00000057757	PITHD1	1	1	1	3	protein_coding	-1.21777	-1.05013	0	1	0	1
ENSG00000105894	PTN	1	1	1	3	protein_coding	1.84776	-1.08117	0	0	1	1
ENSG00000112559	MDFI	1	1	0	2	protein_coding	4.07291	#N/A	0	1	0	1
ENSG00000162511	LAPTM5	1	1	0	2	protein_coding	3.80573	#N/A	0	0	1	1
ENSG00000136859	ANGPTL2	0	1	1	2	protein_coding	3.07447	#N/A	0	0	1	1
ENSG00000117318	ID3	1	1	0	2	protein_coding	2.99034	#N/A	0	1	0	1
ENSG00000064666	CNN2	1	1	0	2	protein_coding	2.89657	#N/A	0	0	1	1
ENSG00000168938	PPIC	1	1	0	2	protein_coding	2.88327	#N/A	0	0	1	1
ENSG00000100196	KDELR3	1	1	0	2	protein_coding	2.56054	#N/A	0	0	1	1
ENSG00000100445	SDR39U1	0	1	1	2	protein_coding	2.39875	#N/A	0	0	1	1
ENSG00000196517	SLC6A9	1	1	0	2	protein_coding	2.29568	#N/A	0	0	1	1
ENSG00000154553	PDLIM3	1	0	1	2	protein_coding	2.15206	#N/A	0	0	1	1
ENSG00000186063	AIDA	1	1	0	2	protein_coding	2.0694	#N/A	1	0	0	1
ENSG00000107796	ACTA2	1	1	0	2	protein_coding	1.95015	#N/A	0	1	0	1
ENSG00000168672	FAM84B	1	1	0	2	protein_coding	1.84511	#N/A	0	1	0	1
ENSG00000110880	CORO1C	1	1	0	2	protein_coding	1.46347	#N/A	0	1	0	1
ENSG00000181826	RELL1	0	1	1	2	protein_coding	1.45672	#N/A	0	0	1	1
ENSG00000172638	EFEMP2	0	1	1	2	protein_coding	1.3665	#N/A	0	0	1	1
ENSG00000089050	RBBP9	1	0	1	2	protein_coding	1.31037	#N/A	0	0	1	1
ENSG00000179409	GEMIN4	1	1	0	2	protein_coding	1.04621	#N/A	0	0	1	1
ENSG00000173442	EHBP1L1	1	1	0	2	protein_coding	0	#N/A	0	0	1	1
ENSG00000182247	UBE2E2	1	1	0	2	protein_coding	0	#N/A	0	1	0	1
ENSG00000100427	MLC1	1	1	0	2	protein_coding	0	#N/A	0	0	1	1
ENSG00000004487	KDM1A	0	1	1	2	protein_coding	0	#N/A	0	0	1	1
ENSG00000063978	RNF4	1	1	0	2	protein_coding	0	#N/A	0	0	1	1
ENSG00000071051	NCK2	1	0	1	2	protein_coding	0	#N/A	0	0	1	1
ENSG00000072401	UBE2D1	0	1	1	2	protein_coding	0	#N/A	0	1	0	1
ENSG00000100380	ST13	1	1	0	2	protein_coding	0	#N/A	0	0	1	1
ENSG00000110090	CPT1A	0	1	1	2	protein_coding	0	#N/A	1	0	0	1
ENSG00000113758	DBN1	1	0	1	2	protein_coding	0	#N/A	0	0	1	1
ENSG00000117505	DR1	1	1	0	2	protein_coding	0	#N/A	0	0	1	1
ENSG00000118816	CCNI	1	1	0	2	protein_coding	0	#N/A	0	0	1	1
ENSG00000120656	TAF12	1	1	0	2	protein_coding	0	#N/A	0	0	1	1
ENSG00000120693	SMAD9	1	1	0	2	protein_coding	0	#N/A	0	1	0	1
ENSG00000120913	PDLIM2	0	1	1	2	protein_coding	0	#N/A	0	1	0	1
ENSG00000126878	AIF1L	1	1	0	2	protein_coding	0	#N/A	1	0	0	1
ENSG00000132003	ZSWIM4	1	1	0	2	protein_coding	0	#N/A	0	0	1	1
ENSG00000132170	PPARG	0	1	1	2	protein_coding	0	#N/A	0	1	0	1
ENSG00000136603	SKIL	1	1	0	2	protein_coding	0	#N/A	0	0	1	1
ENSG00000138613	APH1B	0	1	1	2	protein_coding	0	#N/A	1	0	0	1
ENSG00000139438	FAM222A	0	1	1	2	protein_coding	0	#N/A	0	1	0	1
ENSG00000139910	NOVA1	1	0	1	2	protein_coding	0	#N/A	0	1	0	1
ENSG00000139946	PELI2	1	0	1	2	protein_coding	0	#N/A	0	1	0	1
ENSG00000144747	TMF1	1	1	0	2	protein_coding	0	#N/A	0	0	1	1
ENSG00000145284	SCD5	0	1	1	2	protein_coding	0	#N/A	0	0	1	1
ENSG00000152409	JMY	1	1	0	2	protein_coding	0	#N/A	0	0	1	1
ENSG00000157978	LDLRAP1	1	0	1	2	protein_coding	0	#N/A	1	0	0	1
ENSG00000159023	EPB41	1	1	0	2	protein_coding	0	#N/A	0	1	0	1
ENSG00000160685	ZBTB7B	1	1	0	2	protein_coding	0	#N/A	1	0	0	1
ENSG00000165449	SLC16A9	0	1	1	2	protein_coding	0	#N/A	0	0	1	1
ENSG00000166822	TMEM170A	1	1	0	2	protein_coding	0	#N/A	0	1	0	1
ENSG00000166987	MBD6	1	0	1	2	protein_coding	0	#N/A	0	0	1	1
ENSG00000168807	SNTB2	1	1	0	2	protein_coding	0	#N/A	1	0	0	1
ENSG00000172795	DCP2	0	1	1	2	protein_coding	0	#N/A	0	1	0	1
ENSG00000172819	RARG	0	1	1	2	protein_coding	0	#N/A	1	0	0	1
ENSG00000174748	RPL15	1	1	0	2	protein_coding	0	#N/A	0	0	1	1
ENSG00000179348	GATA2	1	1	0	2	protein_coding	0	#N/A	0	1	0	1
ENSG00000180370	PAK2	0	1	1	2	protein_coding	0	#N/A	0	0	1	1
ENSG00000182534	MXRA7	1	0	1	2	protein_coding	0	#N/A	0	0	1	1
ENSG00000186298	PPP1CC	0	1	1	2	protein_coding	0	#N/A	0	1	0	1
ENSG00000186918	ZNF395	1	0	1	2	protein_coding	0	#N/A	0	1	0	1
ENSG00000186951	PPARA	0	1	1	2	protein_coding	0	#N/A	0	0	1	1
ENSG00000187257	RSBN1L	1	1	0	2	protein_coding	0	#N/A	0	1	0	1
ENSG00000197006	METTL9	1	1	0	2	protein_coding	0	#N/A	0	0	1	1
ENSG00000065054	SLC9A3R2	1	1	0	2	protein_coding	-1.33714	#N/A	0	0	1	1
ENSG00000101190	TCFL5	1	1	0	2	protein_coding	-1.37337	#N/A	0	0	1	1
ENSG00000125967	NECAB3	1	1	0	2	protein_coding	-1.88043	#N/A	0	0	1	1
ENSG00000099822	HCN2	1	1	0	2	protein_coding	-2.9521	#N/A	0	0	1	1
ENSG00000241697	TMEFF1	0	1	1	2	protein_coding	-3.46808	#N/A	0	1	0	1
ENSG00000100285	NEFH	1	1	0	2	protein_coding	-4.87459	#N/A	0	0	1	1
ENSG00000144452	ABCA12	1	0	1	2	protein_coding	0	1.19172	0	1	0	1
ENSG00000163064	EN1	1	1	0	2	protein_coding	7.03579	1.17368	0	1	0	1
ENSG00000092853	CLSPN	1	1	0	2	protein_coding	2.42772	1.17124	0	0	1	1
ENSG00000174371	EXO1	0	1	1	2	protein_coding	3.86814	1.15596	0	0	1	1
ENSG00000119661	DNAL1	0	1	1	2	protein_coding	0	1.09383	0	0	1	1
ENSG00000118513	MYB	1	1	0	2	protein_coding	1.27858	1.08205	1	0	0	1
ENSG00000152455	SUV39H2	1	1	0	2	protein_coding	1.06791	1.08046	1	0	0	1
ENSG00000076770	MBNL3	1	0	1	2	protein_coding	1.65609	1.07508	1	0	0	1
ENSG00000120802	TMPO	1	1	0	2	protein_coding	1.67176	1.07152	0	0	1	1
ENSG00000188848	BEND4	0	1	1	2	protein_coding	-2.55962	1.06629	0	1	0	1
ENSG00000133195	SLC39A11	0	1	1	2	protein_coding	0	1.06482	0	1	0	1
ENSG00000198604	BAZ1A	0	1	1	2	protein_coding	1.41748	1.0544	0	0	1	1
ENSG00000114850	SSR3	0	1	1	2	protein_coding	1.47805	1.05091	0	0	1	1
ENSG00000133119	RFC3	0	1	1	2	protein_coding	1.88965	1.04937	0	0	1	1
ENSG00000160325	CACFD1	1	0	1	2	protein_coding	0	1.04877	1	0	0	1
ENSG00000023608	SNAPC1	1	1	0	2	protein_coding	1.30847	1.04785	0	0	1	1
ENSG00000168993	CPLX1	0	1	1	2	protein_coding	-4.8699	1.04728	0	0	1	1
ENSG00000105711	SCN1B	1	1	0	2	protein_coding	-3.90738	1.04583	0	0	1	1
ENSG00000065911	MTHFD2	1	1	0	2	protein_coding	3.03691	1.04253	0	0	1	1
ENSG00000148334	PTGES2	0	1	1	2	protein_coding	-1.19515	1.04218	0	0	1	1
ENSG00000005513	SOX8	1	1	0	2	protein_coding	1.04936	1.03803	1	0	0	1
ENSG00000185236	RAB11B	1	0	1	2	protein_coding	0	1.03741	0	0	1	1
ENSG00000013297	CLDN11	0	1	1	2	protein_coding	0	1.03547	0	0	1	1
ENSG00000099899	TRMT2A	0	1	1	2	protein_coding	0	1.03237	0	1	0	1
ENSG00000205683	DPF3	0	1	1	2	protein_coding	1.03411	1.03236	0	0	1	1
ENSG00000015475	BID	1	1	0	2	protein_coding	0	1.03083	1	0	0	1
ENSG00000141401	IMPA2	1	1	0	2	protein_coding	0	1.02825	0	0	1	1
ENSG00000069509	FUNDC1	1	1	0	2	protein_coding	0	1.02736	0	0	1	1
ENSG00000066855	MTFR1	1	1	0	2	protein_coding	1.39393	1.02639	0	0	1	1
ENSG00000131470	PSMC3IP	1	1	0	2	protein_coding	1.88398	1.02631	0	0	1	1
ENSG00000121542	SEC22A	1	0	1	2	protein_coding	0	1.02587	0	1	0	1
ENSG00000109689	STIM2	1	1	0	2	protein_coding	0	1.02568	0	1	0	1
ENSG00000127337	YEATS4	0	1	1	2	protein_coding	1.6612	1.0251	0	0	1	1
ENSG00000065485	PDIA5	0	1	1	2	protein_coding	2.1883	1.02455	0	1	0	1
ENSG00000169813	HNRNPF	1	1	0	2	protein_coding	1.34944	1.02324	0	1	0	1
ENSG00000204439	C6orf47	1	1	0	2	protein_coding	1.02244	1.023	0	0	1	1
ENSG00000179387	ELMOD2	1	0	1	2	protein_coding	0	1.0224	0	0	1	1
ENSG00000130741	EIF2S3	1	1	0	2	protein_coding	0	1.02203	0	0	1	1
ENSG00000063176	SPHK2	1	1	0	2	protein_coding	-1.03217	1.02193	0	0	1	1
ENSG00000168268	NT5DC2	1	0	1	2	protein_coding	2.07555	1.02126	0	0	1	1
ENSG00000099901	RANBP1	0	1	1	2	protein_coding	0	1.021	0	0	1	1
ENSG00000133065	SLC41A1	1	1	0	2	protein_coding	0	1.01822	0	0	1	1
ENSG00000166886	NAB2	1	1	0	2	protein_coding	0	1.01766	0	0	1	1
ENSG00000127334	DYRK2	1	1	0	2	protein_coding	0	1.01665	1	0	0	1
ENSG00000095002	MSH2	1	0	1	2	protein_coding	0	1.01377	0	0	1	1
ENSG00000147164	SNX12	0	1	1	2	protein_coding	0	1.01039	0	1	0	1
ENSG00000120699	EXOSC8	0	1	1	2	protein_coding	1.44872	-1.01315	0	0	1	1
ENSG00000119638	NEK9	0	1	1	2	protein_coding	0	-1.01328	1	0	0	1
ENSG00000165915	SLC39A13	1	0	1	2	protein_coding	0	-1.01347	0	1	0	1
ENSG00000183283	DAZAP2	1	0	1	2	protein_coding	0	-1.01473	0	1	0	1
ENSG00000237441	RGL2	1	1	0	2	protein_coding	0	-1.01574	0	1	0	1
ENSG00000163683	SMIM14	1	1	0	2	protein_coding	0	-1.01639	0	1	0	1
ENSG00000054965	FAM168A	1	1	0	2	protein_coding	0	-1.01858	0	0	1	1
ENSG00000137726	FXYD6	1	0	1	2	protein_coding	1.05144	-1.02148	0	0	1	1
ENSG00000147852	VLDLR	1	0	1	2	protein_coding	0	-1.0236	1	0	0	1
ENSG00000068489	PRR11	0	1	1	2	protein_coding	3.15184	-1.02495	0	0	1	1
ENSG00000130304	SLC27A1	1	1	0	2	protein_coding	0	-1.02586	1	0	0	1
ENSG00000063660	GPC1	0	1	1	2	protein_coding	0	-1.02671	1	0	0	1
ENSG00000167703	SLC43A2	1	1	0	2	protein_coding	0	-1.02984	0	0	1	1
ENSG00000140044	JDP2	1	1	0	2	protein_coding	0	-1.02989	0	0	1	1
ENSG00000168615	ADAM9	0	1	1	2	protein_coding	2.22475	-1.0325	0	0	1	1
ENSG00000084628	NKAIN1	0	1	1	2	protein_coding	0	-1.03273	0	0	1	1
ENSG00000112144	ICK	1	1	0	2	protein_coding	0	-1.03346	0	0	1	1
ENSG00000159459	UBR1	0	1	1	2	protein_coding	0	-1.03647	0	1	0	1
ENSG00000146950	SHROOM2	1	1	0	2	protein_coding	0	-1.03886	0	0	1	1
ENSG00000134817	APLNR	0	1	1	2	protein_coding	1.5934	-1.04074	0	1	0	1
ENSG00000144802	NFKBIZ	1	0	1	2	protein_coding	0	-1.04101	1	0	0	1
ENSG00000180773	SLC36A4	0	1	1	2	protein_coding	0	-1.04217	0	0	1	1
ENSG00000011347	SYT7	0	1	1	2	protein_coding	-3.76639	-1.04258	0	0	1	1
ENSG00000120738	EGR1	1	1	0	2	protein_coding	1.61902	-1.04622	1	0	0	1
ENSG00000173281	PPP1R3B	0	1	1	2	protein_coding	2.4061	-1.0516	1	0	0	1
ENSG00000107562	CXCL12	0	1	1	2	protein_coding	0	-1.05421	0	0	1	1
ENSG00000125772	GPCPD1	1	0	1	2	protein_coding	0	-1.05522	0	0	1	1
ENSG00000157107	FCHO2	1	0	1	2	protein_coding	0	-1.05898	1	0	0	1
ENSG00000129474	AJUBA	1	1	0	2	protein_coding	2.20553	-1.06644	0	0	1	1
ENSG00000115461	IGFBP5	1	1	0	2	protein_coding	3.59929	-1.06911	0	0	1	1
ENSG00000142494	SLC47A1	1	1	0	2	protein_coding	0	-1.07197	0	0	1	1
ENSG00000154654	NCAM2	0	1	1	2	protein_coding	0	-1.07777	1	0	0	1
ENSG00000153904	DDAH1	0	1	1	2	protein_coding	-1.09638	-1.0983	0	1	0	1
ENSG00000109861	CTSC	1	1	1	3	protein_coding	3.37738	#N/A	0	0	0	0
ENSG00000116670	MAD2L2	1	1	1	3	protein_coding	1.97049	#N/A	0	0	0	0
ENSG00000110900	TSPAN11	1	1	1	3	protein_coding	1.87076	#N/A	0	0	0	0
ENSG00000169299	PGM2	1	1	1	3	protein_coding	1.73676	#N/A	0	0	0	0
ENSG00000198538	ZNF28	1	1	1	3	protein_coding	1.46495	#N/A	0	0	0	0
ENSG00000196387	ZNF140	1	1	1	3	protein_coding	1.28021	#N/A	0	0	0	0
ENSG00000116747	TROVE2	1	1	1	3	protein_coding	1.19946	#N/A	0	0	0	0
ENSG00000085231	AK6	1	1	1	3	protein_coding	0	#N/A	0	0	0	0
ENSG00000112851	ERBIN	1	1	1	3	protein_coding	0	#N/A	0	0	0	0
ENSG00000114786	ABHD14A-ACY1	1	1	1	3	protein_coding	0	#N/A	0	0	0	0
ENSG00000119328	FAM206A	1	1	1	3	protein_coding	0	#N/A	0	0	0	0
ENSG00000124098	FAM210B	1	1	1	3	protein_coding	0	#N/A	0	0	0	0
ENSG00000134698	AGO4	1	1	1	3	protein_coding	0	#N/A	0	0	0	0
ENSG00000138434	ITPRID2	1	1	1	3	protein_coding	0	#N/A	0	0	0	0
ENSG00000148153	INIP	1	1	1	3	protein_coding	0	#N/A	0	0	0	0
ENSG00000151576	QTRT2	1	1	1	3	protein_coding	0	#N/A	0	0	0	0
ENSG00000154153	RETREG1	1	1	1	3	protein_coding	0	#N/A	0	0	0	0
ENSG00000164300	SERINC5	1	1	1	3	protein_coding	0	#N/A	0	0	0	0
ENSG00000166681	BEX3	1	1	1	3	protein_coding	0	#N/A	0	0	0	0
ENSG00000172057	ORMDL3	1	1	1	3	protein_coding	0	#N/A	0	0	0	0
ENSG00000175348	TMEM9B	1	1	1	3	protein_coding	0	#N/A	0	0	0	0
ENSG00000185432	METTL7A	1	1	1	3	protein_coding	0	#N/A	0	0	0	0
ENSG00000189362	NEMP2	1	1	1	3	protein_coding	0	#N/A	0	0	0	0
ENSG00000219545	UMAD1	1	1	1	3	protein_coding	0	#N/A	0	0	0	0
ENSG00000224940	PRRT4	1	1	1	3	protein_coding	0	#N/A	0	0	0	0
ENSG00000236609	ZNF853	1	1	1	3	protein_coding	0	#N/A	0	0	0	0
ENSG00000267673	FDX2	1	1	1	3	protein_coding	0	#N/A	0	0	0	0
ENSG00000274180	NATD1	1	1	1	3	protein_coding	0	#N/A	0	0	0	0
ENSG00000143416	SELENBP1	1	1	1	3	protein_coding	-1.47211	#N/A	0	0	0	0
ENSG00000134317	GRHL1	1	1	1	3	protein_coding	-1.50497	#N/A	0	0	0	0
ENSG00000128408	RIBC2	1	1	1	3	protein_coding	1.40059	1.15088	0	0	0	0
ENSG00000158402	CDC25C	1	1	1	3	protein_coding	4.66427	1.12823	0	0	0	0
ENSG00000014138	POLA2	1	1	1	3	protein_coding	1.12982	1.12406	0	0	0	0
ENSG00000130707	ASS1	1	1	1	3	protein_coding	-1.01451	1.10098	0	0	0	0
ENSG00000175322	ZNF519	1	1	1	3	protein_coding	0	1.09967	0	0	0	0
ENSG00000147536	GINS4	1	1	1	3	protein_coding	3.35293	1.0921	0	0	0	0
ENSG00000154920	EME1	1	1	1	3	protein_coding	3.93468	1.08063	0	0	0	0
ENSG00000187741	FANCA	1	1	1	3	protein_coding	1.69882	1.06894	0	0	0	0
ENSG00000092036	HAUS4	1	1	1	3	protein_coding	1.1026	1.06358	0	0	0	0
ENSG00000172409	CLP1	1	1	1	3	protein_coding	1.28136	1.05807	0	0	0	0
ENSG00000131844	MCCC2	1	1	1	3	protein_coding	0	1.05262	0	0	0	0
ENSG00000177108	ZDHHC22	1	1	1	3	protein_coding	-1.58521	1.04999	0	0	0	0
ENSG00000101189	MRGBP	1	1	1	3	protein_coding	0	1.04877	0	0	0	0
ENSG00000110492	MDK	1	1	1	3	protein_coding	3.03888	1.04723	0	0	0	0
ENSG00000163807	KIAA1143	1	1	1	3	protein_coding	0	1.04658	0	0	0	0
ENSG00000171792	RHNO1	1	1	1	3	protein_coding	0	1.04471	0	0	0	0
ENSG00000182307	C8orf33	1	1	1	3	protein_coding	0	1.04341	0	0	0	0
ENSG00000135617	PRADC1	1	1	1	3	protein_coding	0	1.04112	0	0	0	0
ENSG00000099284	H2AFY2	1	1	1	3	protein_coding	0	1.03957	0	0	0	0
ENSG00000284024	HSPA14	1	1	1	3	protein_coding	3.894	1.03348	0	0	0	0
ENSG00000101224	CDC25B	1	1	1	3	protein_coding	0	1.03149	0	0	0	0
ENSG00000184489	PTP4A3	1	1	1	3	protein_coding	0	1.03141	0	0	0	0
ENSG00000163832	ELP6	1	1	1	3	protein_coding	0	1.03055	0	0	0	0
ENSG00000242259	C22orf39	1	1	1	3	protein_coding	0	1.02742	0	0	0	0
ENSG00000178966	RMI1	1	1	1	3	protein_coding	1.47288	1.02246	0	0	0	0
ENSG00000134291	TMEM106C	1	1	1	3	protein_coding	1.64273	1.02217	0	0	0	0
ENSG00000077942	FBLN1	1	1	1	3	protein_coding	1.55746	1.02069	0	0	0	0
ENSG00000257103	LSM14A	1	1	1	3	protein_coding	0	1.01029	0	0	0	0
ENSG00000162734	PEA15	1	1	1	3	protein_coding	0	-1.01478	0	0	0	0
ENSG00000139218	SCAF11	1	1	1	3	protein_coding	0	-1.0188	0	0	0	0
ENSG00000167220	HDHD2	1	1	1	3	protein_coding	0	-1.0193	0	0	0	0
ENSG00000118418	HMGN3	1	1	1	3	protein_coding	0	-1.02074	0	0	0	0
ENSG00000133103	COG6	1	1	1	3	protein_coding	0	-1.02147	0	0	0	0
ENSG00000135776	ABCB10	1	1	1	3	protein_coding	0	-1.02227	0	0	0	0
ENSG00000075303	SLC25A40	1	1	1	3	protein_coding	0	-1.02372	0	0	0	0
ENSG00000163788	SNRK	1	1	1	3	protein_coding	0	-1.02977	0	0	0	0
ENSG00000171604	CXXC5	1	1	1	3	protein_coding	0	-1.03692	0	0	0	0
ENSG00000118242	MREG	1	1	1	3	protein_coding	1.58041	-1.03843	0	0	0	0
ENSG00000115641	FHL2	1	1	1	3	protein_coding	0	-1.04097	0	0	0	0
ENSG00000165795	NDRG2	1	1	1	3	protein_coding	-2.01163	-1.04504	0	0	0	0
ENSG00000182580	EPHB3	1	1	1	3	protein_coding	1.15343	-1.0514	0	0	0	0
ENSG00000106003	LFNG	1	1	1	3	protein_coding	2.47525	-1.05691	0	0	0	0
ENSG00000213047	DENND1B	1	1	1	3	protein_coding	0	-1.06162	0	0	0	0
ENSG00000120162	MOB3B	1	1	1	3	protein_coding	0	-1.07495	0	0	0	0
ENSG00000092758	COL9A3	1	1	1	3	protein_coding	0	-1.07929	0	0	0	0
ENSG00000154511	FAM69A	1	1	1	3	protein_coding	0	-1.13633	0	0	0	0
ENSG00000108821	COL1A1	1	0	1	2	protein_coding	6.03533	#N/A	0	0	0	0
ENSG00000088882	CPXM1	0	1	1	2	protein_coding	6.00029	#N/A	0	0	0	0
ENSG00000134668	SPOCD1	1	1	0	2	protein_coding	5.68998	#N/A	0	0	0	0
ENSG00000166803	PCLAF	1	1	0	2	protein_coding	5.5771	#N/A	0	0	0	0
ENSG00000177602	HASPIN	1	1	0	2	protein_coding	5.00652	#N/A	0	0	0	0
ENSG00000165490	DDIAS	1	1	0	2	protein_coding	3.98213	#N/A	0	0	0	0
ENSG00000100292	HMOX1	1	1	0	2	protein_coding	3.89228	#N/A	0	0	0	0
ENSG00000130592	LSP1	1	1	0	2	protein_coding	3.74909	#N/A	0	0	0	0
ENSG00000100336	APOL4	1	1	0	2	protein_coding	3.2969	#N/A	0	0	0	0
ENSG00000183160	TMEM119	0	1	1	2	protein_coding	3.18113	#N/A	0	0	0	0
ENSG00000262179	MYMX	1	1	0	2	protein_coding	3.02388	#N/A	0	0	0	0
ENSG00000175305	CCNE2	1	1	0	2	protein_coding	2.94705	#N/A	0	0	0	0
ENSG00000138080	EMILIN1	1	1	0	2	protein_coding	2.75447	#N/A	0	0	0	0
ENSG00000106624	AEBP1	0	1	1	2	protein_coding	2.60572	#N/A	0	0	0	0
ENSG00000213694	S1PR3	0	1	1	2	protein_coding	2.42518	#N/A	0	0	0	0
ENSG00000158246	TENT5B	1	1	0	2	protein_coding	2.19519	#N/A	0	0	0	0
ENSG00000167244	IGF2	1	0	1	2	protein_coding	2.13898	#N/A	0	0	0	0
ENSG00000114115	RBP1	1	1	0	2	protein_coding	2.11987	#N/A	0	0	0	0
ENSG00000010704	HFE	1	1	0	2	protein_coding	2.10819	#N/A	0	0	0	0
ENSG00000168209	DDIT4	1	1	0	2	protein_coding	2.07194	#N/A	0	0	0	0
ENSG00000142619	PADI3	1	1	0	2	protein_coding	1.87501	#N/A	0	0	0	0
ENSG00000167695	FAM57A	0	1	1	2	protein_coding	1.72983	#N/A	0	0	0	0
ENSG00000066230	SLC9A3	1	1	0	2	protein_coding	1.68642	#N/A	0	0	0	0
ENSG00000203546	AL139353.1	0	1	1	2	protein_coding	1.66187	#N/A	0	0	0	0
ENSG00000162430	SELENON	0	1	1	2	protein_coding	1.6075	#N/A	0	0	0	0
ENSG00000102699	PARP4	1	0	1	2	protein_coding	1.52057	#N/A	0	0	0	0
ENSG00000136943	CTSV	1	0	1	2	protein_coding	1.50599	#N/A	0	0	0	0
ENSG00000135437	RDH5	1	1	0	2	protein_coding	1.49991	#N/A	0	0	0	0
ENSG00000184557	SOCS3	0	1	1	2	protein_coding	1.45814	#N/A	0	0	0	0
ENSG00000058804	NDC1	1	1	0	2	protein_coding	1.45513	#N/A	0	0	0	0
ENSG00000149260	CAPN5	0	1	1	2	protein_coding	1.41874	#N/A	0	0	0	0
ENSG00000155090	KLF10	1	1	0	2	protein_coding	1.3779	#N/A	0	0	0	0
ENSG00000205581	HMGN1	1	0	1	2	protein_coding	1.37093	#N/A	0	0	0	0
ENSG00000175600	SUGCT	0	1	1	2	protein_coding	1.32136	#N/A	0	0	0	0
ENSG00000136451	VEZF1	1	1	0	2	protein_coding	1.30999	#N/A	0	0	0	0
ENSG00000142541	RPL13A	1	1	0	2	protein_coding	1.26396	#N/A	0	0	0	0
ENSG00000060138	YBX3	1	1	0	2	protein_coding	1.24188	#N/A	0	0	0	0
ENSG00000197958	RPL12	1	1	0	2	protein_coding	1.21651	#N/A	0	0	0	0
ENSG00000182103	FAM181B	0	1	1	2	protein_coding	1.18781	#N/A	0	0	0	0
ENSG00000176046	NUPR1	1	1	0	2	protein_coding	1.09815	#N/A	0	0	0	0
ENSG00000125089	SH3TC1	1	0	1	2	protein_coding	1.08897	#N/A	0	0	0	0
ENSG00000054967	RELT	1	1	0	2	protein_coding	1.08165	#N/A	0	0	0	0
ENSG00000130818	ZNF426	0	1	1	2	protein_coding	1.07786	#N/A	0	0	0	0
ENSG00000126790	L3HYPDH	1	1	0	2	protein_coding	1.04074	#N/A	0	0	0	0
ENSG00000161896	IP6K3	1	1	0	2	protein_coding	0	#N/A	0	0	0	0
ENSG00000166289	PLEKHF1	1	1	0	2	protein_coding	0	#N/A	0	0	0	0
ENSG00000167992	VWCE	1	1	0	2	protein_coding	0	#N/A	0	0	0	0
ENSG00000198959	TGM2	0	1	1	2	protein_coding	0	#N/A	0	0	0	0
ENSG00000241978	AKAP2	1	1	0	2	protein_coding	0	#N/A	0	0	0	0
ENSG00000248643	RBM14-RBM4	0	1	1	2	protein_coding	0	#N/A	0	0	0	0
ENSG00000167034	NKX3-1	1	0	1	2	protein_coding	0	#N/A	0	0	0	0
ENSG00000053371	AKR7A2	0	1	1	2	protein_coding	0	#N/A	0	0	0	0
ENSG00000072135	PTPN18	1	0	1	2	protein_coding	0	#N/A	0	0	0	0
ENSG00000074657	ZNF532	1	1	0	2	protein_coding	0	#N/A	0	0	0	0
ENSG00000087510	TFAP2C	1	1	0	2	protein_coding	0	#N/A	0	0	0	0
ENSG00000088836	SLC4A11	1	1	0	2	protein_coding	0	#N/A	0	0	0	0
ENSG00000100316	RPL3	1	1	0	2	protein_coding	0	#N/A	0	0	0	0
ENSG00000105088	OLFM2	1	1	0	2	protein_coding	0	#N/A	0	0	0	0
ENSG00000107821	KAZALD1	1	1	0	2	protein_coding	0	#N/A	0	0	0	0
ENSG00000108733	PEX12	1	1	0	2	protein_coding	0	#N/A	0	0	0	0
ENSG00000108786	HSD17B1	1	1	0	2	protein_coding	0	#N/A	0	0	0	0
ENSG00000109062	SLC9A3R1	1	1	0	2	protein_coding	0	#N/A	0	0	0	0
ENSG00000115738	ID2	1	1	0	2	protein_coding	0	#N/A	0	0	0	0
ENSG00000116874	WARS2	0	1	1	2	protein_coding	0	#N/A	0	0	0	0
ENSG00000117133	RPF1	0	1	1	2	protein_coding	0	#N/A	0	0	0	0
ENSG00000129493	HEATR5A	0	1	1	2	protein_coding	0	#N/A	0	0	0	0
ENSG00000132680	KHDC4	1	1	0	2	protein_coding	0	#N/A	0	0	0	0
ENSG00000135341	MAP3K7	1	1	0	2	protein_coding	0	#N/A	0	0	0	0
ENSG00000135486	HNRNPA1	1	1	0	2	protein_coding	0	#N/A	0	0	0	0
ENSG00000136425	CIB2	1	0	1	2	protein_coding	0	#N/A	0	0	0	0
ENSG00000138036	DYNC2LI1	1	0	1	2	protein_coding	0	#N/A	0	0	0	0
ENSG00000138658	ZGRF1	1	1	0	2	protein_coding	0	#N/A	0	0	0	0
ENSG00000139800	ZIC5	1	1	0	2	protein_coding	0	#N/A	0	0	0	0
ENSG00000140983	RHOT2	0	1	1	2	protein_coding	0	#N/A	0	0	0	0
ENSG00000142961	MOB3C	1	1	0	2	protein_coding	0	#N/A	0	0	0	0
ENSG00000149346	SLX4IP	1	0	1	2	protein_coding	0	#N/A	0	0	0	0
ENSG00000154102	C16orf74	1	1	0	2	protein_coding	0	#N/A	0	0	0	0
ENSG00000154124	OTULIN	1	1	0	2	protein_coding	0	#N/A	0	0	0	0
ENSG00000154429	CCSAP	1	1	0	2	protein_coding	0	#N/A	0	0	0	0
ENSG00000161996	WDR90	1	1	0	2	protein_coding	0	#N/A	0	0	0	0
ENSG00000162062	TEDC2	1	1	0	2	protein_coding	0	#N/A	0	0	0	0
ENSG00000164292	RHOBTB3	0	1	1	2	protein_coding	0	#N/A	0	0	0	0
ENSG00000164850	GPER1	1	0	1	2	protein_coding	0	#N/A	0	0	0	0
ENSG00000164904	ALDH7A1	0	1	1	2	protein_coding	0	#N/A	0	0	0	0
ENSG00000165716	FAM69B	0	1	1	2	protein_coding	0	#N/A	0	0	0	0
ENSG00000165879	FRAT1	1	1	0	2	protein_coding	0	#N/A	0	0	0	0
ENSG00000171903	CYP4F11	1	1	0	2	protein_coding	0	#N/A	0	0	0	0
ENSG00000175130	MARCKSL1	1	0	1	2	protein_coding	0	#N/A	0	0	0	0
ENSG00000175785	PRIMA1	0	1	1	2	protein_coding	0	#N/A	0	0	0	0
ENSG00000176261	ZBTB8OS	0	1	1	2	protein_coding	0	#N/A	0	0	0	0
ENSG00000176485	PLA2G16	0	1	1	2	protein_coding	0	#N/A	0	0	0	0
ENSG00000179604	CDC42EP4	1	1	0	2	protein_coding	0	#N/A	0	0	0	0
ENSG00000179772	FOXS1	1	1	0	2	protein_coding	0	#N/A	0	0	0	0
ENSG00000182022	CHST15	0	1	1	2	protein_coding	0	#N/A	0	0	0	0
ENSG00000182934	SRPRA	0	1	1	2	protein_coding	0	#N/A	0	0	0	0
ENSG00000188707	ZBED6CL	0	1	1	2	protein_coding	0	#N/A	0	0	0	0
ENSG00000197119	SLC25A29	1	0	1	2	protein_coding	0	#N/A	0	0	0	0
ENSG00000197417	SHPK	0	1	1	2	protein_coding	0	#N/A	0	0	0	0
ENSG00000198753	PLXNB3	0	1	1	2	protein_coding	0	#N/A	0	0	0	0
ENSG00000205544	TMEM256	0	1	1	2	protein_coding	0	#N/A	0	0	0	0
ENSG00000224578	HNRNPA1P48	1	1	0	2	protein_coding	0	#N/A	0	0	0	0
ENSG00000225968	ELFN1	0	1	1	2	protein_coding	0	#N/A	0	0	0	0
ENSG00000226174	TEX22	1	0	1	2	protein_coding	0	#N/A	0	0	0	0
ENSG00000232388	SMIM26	1	1	0	2	protein_coding	0	#N/A	0	0	0	0
ENSG00000249709	ZNF564	1	1	0	2	protein_coding	0	#N/A	0	0	0	0
ENSG00000255819	KLRC4-KLRK1	1	1	0	2	protein_coding	0	#N/A	0	0	0	0
ENSG00000263020	AL662899.2	1	1	0	2	protein_coding	0	#N/A	0	0	0	0
ENSG00000265818	EEF1E1-BLOC1S5	0	1	1	2	protein_coding	0	#N/A	0	0	0	0
ENSG00000266074	BAHCC1	1	0	1	2	protein_coding	0	#N/A	0	0	0	0
ENSG00000275993	SIK1B	1	1	0	2	protein_coding	0	#N/A	0	0	0	0
ENSG00000284491	THSD8	1	1	0	2	protein_coding	0	#N/A	0	0	0	0
ENSG00000284981	AC093668.3	1	0	1	2	protein_coding	0	#N/A	0	0	0	0
ENSG00000115687	PASK	1	1	0	2	protein_coding	-1.00017	#N/A	0	0	0	0
ENSG00000111077	TNS2	1	0	1	2	protein_coding	-1.19958	#N/A	0	0	0	0
ENSG00000151468	CCDC3	0	1	1	2	protein_coding	-1.39163	#N/A	0	0	0	0
ENSG00000135824	RGS8	0	1	1	2	protein_coding	-1.53828	#N/A	0	0	0	0
ENSG00000114378	HYAL1	0	1	1	2	protein_coding	-1.73448	#N/A	0	0	0	0
ENSG00000156381	ANKRD9	1	1	0	2	protein_coding	-1.80416	#N/A	0	0	0	0
ENSG00000229544	NKX1-2	1	1	0	2	protein_coding	-1.92293	#N/A	0	0	0	0
ENSG00000180921	FAM83H	1	1	0	2	protein_coding	-2.31032	#N/A	0	0	0	0
ENSG00000128268	MGAT3	0	1	1	2	protein_coding	-2.65779	#N/A	0	0	0	0
ENSG00000183092	BEGAIN	0	1	1	2	protein_coding	-3.3292	#N/A	0	0	0	0
ENSG00000167964	RAB26	1	1	0	2	protein_coding	-3.60985	#N/A	0	0	0	0
ENSG00000136492	BRIP1	1	0	1	2	protein_coding	2.86612	1.24266	0	0	0	0
ENSG00000128591	FLNC	0	1	1	2	protein_coding	3.15434	1.22298	0	0	0	0
ENSG00000189057	FAM111B	1	0	1	2	protein_coding	7.01586	1.20125	0	0	0	0
ENSG00000161888	SPC24	1	1	0	2	protein_coding	3.44558	1.19091	0	0	0	0
ENSG00000140534	TICRR	1	0	1	2	protein_coding	2.27996	1.16812	0	0	0	0
ENSG00000164591	MYOZ3	0	1	1	2	protein_coding	0	1.16003	0	0	0	0
ENSG00000101412	E2F1	1	1	0	2	protein_coding	0	1.15407	0	0	0	0
ENSG00000168496	FEN1	1	1	0	2	protein_coding	0	1.15095	0	0	0	0
ENSG00000123485	HJURP	1	1	0	2	protein_coding	6.48133	1.14603	0	0	0	0
ENSG00000171119	NRTN	0	1	1	2	protein_coding	0	1.14505	0	0	0	0
ENSG00000148204	CRB2	0	1	1	2	protein_coding	0	1.1434	0	0	0	0
ENSG00000100162	CENPM	1	1	0	2	protein_coding	4.15591	1.13329	0	0	0	0
ENSG00000103995	CEP152	1	0	1	2	protein_coding	0	1.12294	0	0	0	0
ENSG00000171848	RRM2	0	1	1	2	protein_coding	7.55229	1.11866	0	0	0	0
ENSG00000165480	SKA3	1	1	0	2	protein_coding	4.53882	1.1181	0	0	0	0
ENSG00000196584	XRCC2	1	0	1	2	protein_coding	2.63356	1.11549	0	0	0	0
ENSG00000167513	CDT1	1	1	0	2	protein_coding	2.0978	1.11248	0	0	0	0
ENSG00000093009	CDC45	1	1	0	2	protein_coding	5.66358	1.11005	0	0	0	0
ENSG00000123219	CENPK	1	1	0	2	protein_coding	4.6989	1.10902	0	0	0	0
ENSG00000085840	ORC1	1	1	0	2	protein_coding	3.7455	1.1048	0	0	0	0
ENSG00000270885	RASL10B	1	1	0	2	protein_coding	-1.71974	1.10257	0	0	0	0
ENSG00000186638	KIF24	1	0	1	2	protein_coding	0	1.10104	0	0	0	0
ENSG00000167670	CHAF1A	1	1	0	2	protein_coding	0	1.10013	0	0	0	0
ENSG00000138346	DNA2	1	0	1	2	protein_coding	0	1.09869	0	0	0	0
ENSG00000140525	FANCI	1	1	0	2	protein_coding	2.78085	1.09649	0	0	0	0
ENSG00000105697	HAMP	0	1	1	2	protein_coding	2.4249	1.09505	0	0	0	0
ENSG00000105011	ASF1B	1	1	0	2	protein_coding	6.47488	1.09128	0	0	0	0
ENSG00000168411	RFWD3	1	1	0	2	protein_coding	1.62713	1.08856	0	0	0	0
ENSG00000131747	TOP2A	1	1	0	2	protein_coding	8.32482	1.08356	0	0	0	0
ENSG00000011332	DPF1	0	1	1	2	protein_coding	-1.33797	1.08156	0	0	0	0
ENSG00000171425	ZNF581	1	1	0	2	protein_coding	1.06874	1.07531	0	0	0	0
ENSG00000142945	KIF2C	1	1	0	2	protein_coding	4.54187	1.07328	0	0	0	0
ENSG00000184992	BRI3BP	1	1	0	2	protein_coding	0	1.07312	0	0	0	0
ENSG00000128050	PAICS	0	1	1	2	protein_coding	1.45733	1.07257	0	0	0	0
ENSG00000170439	METTL7B	1	1	0	2	protein_coding	5.20671	1.07179	0	0	0	0
ENSG00000136122	BORA	0	1	1	2	protein_coding	2.54199	1.06566	0	0	0	0
ENSG00000078900	TP73	1	0	1	2	protein_coding	3.33881	1.06491	0	0	0	0
ENSG00000184160	ADRA2C	0	1	1	2	protein_coding	-3.46104	1.06103	0	0	0	0
ENSG00000010292	NCAPD2	0	1	1	2	protein_coding	1.63689	1.06072	0	0	0	0
ENSG00000262814	MRPL12	0	1	1	2	protein_coding	0	1.06006	0	0	0	0
ENSG00000144596	GRIP2	1	1	0	2	protein_coding	-3.63387	1.05943	0	0	0	0
ENSG00000145365	TIFA	1	0	1	2	protein_coding	1.56365	1.05906	0	0	0	0
ENSG00000160957	RECQL4	1	1	0	2	protein_coding	0	1.05741	0	0	0	0
ENSG00000056998	GYG2	1	1	0	2	protein_coding	1.25706	1.05608	0	0	0	0
ENSG00000145604	SKP2	0	1	1	2	protein_coding	1.02228	1.052	0	0	0	0
ENSG00000084693	AGBL5	1	1	0	2	protein_coding	0	1.05158	0	0	0	0
ENSG00000105173	CCNE1	0	1	1	2	protein_coding	0	1.05088	0	0	0	0
ENSG00000099958	DERL3	1	1	0	2	protein_coding	0	1.05034	0	0	0	0
ENSG00000067842	ATP2B3	0	1	1	2	protein_coding	-5.03476	1.05032	0	0	0	0
ENSG00000186998	EMID1	1	1	0	2	protein_coding	0	1.04995	0	0	0	0
ENSG00000165195	PIGA	0	1	1	2	protein_coding	0	1.04656	0	0	0	0
ENSG00000136261	BZW2	0	1	1	2	protein_coding	1.39142	1.04584	0	0	0	0
ENSG00000106333	PCOLCE	0	1	1	2	protein_coding	3.89913	1.0456	0	0	0	0
ENSG00000100802	C14orf93	1	1	0	2	protein_coding	0	1.04545	0	0	0	0
ENSG00000187049	TMEM216	0	1	1	2	protein_coding	0	1.0449	0	0	0	0
ENSG00000278129	ZNF8	1	1	0	2	protein_coding	0	1.04427	0	0	0	0
ENSG00000166578	IQCD	1	1	0	2	protein_coding	0	1.04399	0	0	0	0
ENSG00000156521	TYSND1	1	1	0	2	protein_coding	0	1.04347	0	0	0	0
ENSG00000137834	SMAD6	1	1	0	2	protein_coding	-1.41522	1.0428	0	0	0	0
ENSG00000182185	RAD51B	0	1	1	2	protein_coding	1.53098	1.04276	0	0	0	0
ENSG00000132207	SLX1A	1	1	0	2	protein_coding	5.87139	1.04214	0	0	0	0
ENSG00000182173	TSEN54	1	1	0	2	protein_coding	0	1.03976	0	0	0	0
ENSG00000100379	KCTD17	0	1	1	2	protein_coding	-1.20575	1.03871	0	0	0	0
ENSG00000121578	B4GALT4	0	1	1	2	protein_coding	0	1.03624	0	0	0	0
ENSG00000173918	C1QTNF1	1	1	0	2	protein_coding	2.12676	1.03615	0	0	0	0
ENSG00000145040	UCN2	1	1	0	2	protein_coding	1.94059	1.03551	0	0	0	0
ENSG00000105707	HPN	1	1	0	2	protein_coding	-1.85164	1.03528	0	0	0	0
ENSG00000160688	FLAD1	0	1	1	2	protein_coding	0	1.03509	0	0	0	0
ENSG00000180884	ZNF792	0	1	1	2	protein_coding	1.24529	1.03478	0	0	0	0
ENSG00000197275	RAD54B	0	1	1	2	protein_coding	3.38856	1.0342	0	0	0	0
ENSG00000188338	SLC38A3	1	1	0	2	protein_coding	0	1.0325	0	0	0	0
ENSG00000162068	NTN3	0	1	1	2	protein_coding	0	1.03147	0	0	0	0
ENSG00000155463	OXA1L	1	1	0	2	protein_coding	0	1.03095	0	0	0	0
ENSG00000198015	MRPL42	0	1	1	2	protein_coding	0	1.03046	0	0	0	0
ENSG00000119630	PGF	1	1	0	2	protein_coding	2.36982	1.03012	0	0	0	0
ENSG00000169100	SLC25A6	1	1	0	2	protein_coding	-1.16147	1.0269	0	0	0	0
ENSG00000100814	CCNB1IP1	1	1	0	2	protein_coding	0	1.02662	0	0	0	0
ENSG00000166965	RCCD1	1	1	0	2	protein_coding	0	1.02631	0	0	0	0
ENSG00000130005	GAMT	0	1	1	2	protein_coding	0	1.02507	0	0	0	0
ENSG00000198189	HSD17B11	0	1	1	2	protein_coding	1.00263	1.0246	0	0	0	0
ENSG00000159147	DONSON	1	1	0	2	protein_coding	0	1.02456	0	0	0	0
ENSG00000159792	PSKH1	0	1	1	2	protein_coding	1.38455	1.02421	0	0	0	0
ENSG00000221829	FANCG	1	1	0	2	protein_coding	0	1.0236	0	0	0	0
ENSG00000140043	PTGR2	1	1	0	2	protein_coding	0	1.02298	0	0	0	0
ENSG00000138767	CNOT6L	1	1	0	2	protein_coding	0	1.02189	0	0	0	0
ENSG00000126215	XRCC3	1	1	0	2	protein_coding	0	1.02163	0	0	0	0
ENSG00000078549	ADCYAP1R1	0	1	1	2	protein_coding	0	1.02145	0	0	0	0
ENSG00000164929	BAALC	0	1	1	2	protein_coding	0	1.02079	0	0	0	0
ENSG00000173511	VEGFB	0	1	1	2	protein_coding	0	1.02021	0	0	0	0
ENSG00000170464	DNAJC18	0	1	1	2	protein_coding	0	1.01891	0	0	0	0
ENSG00000149823	VPS51	1	1	0	2	protein_coding	0	1.01879	0	0	0	0
ENSG00000134419	RPS15A	1	1	0	2	protein_coding	1.8071	1.01834	0	0	0	0
ENSG00000175324	LSM1	1	1	0	2	protein_coding	1.68782	1.01816	0	0	0	0
ENSG00000166452	AKIP1	1	1	0	2	protein_coding	0	1.01687	0	0	0	0
ENSG00000172172	MRPL13	0	1	1	2	protein_coding	1.20299	1.01663	0	0	0	0
ENSG00000104886	PLEKHJ1	0	1	1	2	protein_coding	0	1.01448	0	0	0	0
ENSG00000090487	SPG21	0	1	1	2	protein_coding	0	1.01445	0	0	0	0
ENSG00000184432	COPB2	0	1	1	2	protein_coding	1.09392	1.01443	0	0	0	0
ENSG00000108468	CBX1	1	0	1	2	protein_coding	0	1.01249	0	0	0	0
ENSG00000108107	RPL28	1	1	0	2	protein_coding	0	1.01201	0	0	0	0
ENSG00000089157	RPLP0	1	1	0	2	protein_coding	2.49409	1.01104	0	0	0	0
ENSG00000060762	MPC1	0	1	1	2	protein_coding	0	1.01093	0	0	0	0
ENSG00000145592	RPL37	1	1	0	2	protein_coding	0	1.00971	0	0	0	0
ENSG00000112855	HARS2	0	1	1	2	protein_coding	0	-1.01165	0	0	0	0
ENSG00000187735	TCEA1	0	1	1	2	protein_coding	1.62487	-1.01198	0	0	0	0
ENSG00000100129	EIF3L	1	1	0	2	protein_coding	1.4025	-1.01284	0	0	0	0
ENSG00000119688	ABCD4	1	0	1	2	protein_coding	0	-1.01419	0	0	0	0
ENSG00000196655	TRAPPC4	0	1	1	2	protein_coding	0	-1.01476	0	0	0	0
ENSG00000172081	MOB3A	1	1	0	2	protein_coding	0	-1.01529	0	0	0	0
ENSG00000145029	NICN1	1	1	0	2	protein_coding	-1.35848	-1.01546	0	0	0	0
ENSG00000162032	SPSB3	1	0	1	2	protein_coding	0	-1.01551	0	0	0	0
ENSG00000068912	ERLEC1	0	1	1	2	protein_coding	0	-1.01621	0	0	0	0
ENSG00000177042	TMEM80	1	0	1	2	protein_coding	0	-1.01749	0	0	0	0
ENSG00000104870	FCGRT	0	1	1	2	protein_coding	2.36784	-1.01787	0	0	0	0
ENSG00000204387	C6orf48	1	1	0	2	protein_coding	0	-1.01872	0	0	0	0
ENSG00000167536	DHRS13	1	1	0	2	protein_coding	2.80377	-1.01889	0	0	0	0
ENSG00000146425	DYNLT1	0	1	1	2	protein_coding	2.32759	-1.01895	0	0	0	0
ENSG00000114268	PFKFB4	1	0	1	2	protein_coding	1.375	-1.01943	0	0	0	0
ENSG00000116205	TCEANC2	1	1	0	2	protein_coding	0	-1.0201	0	0	0	0
ENSG00000106868	SUSD1	0	1	1	2	protein_coding	0	-1.02418	0	0	0	0
ENSG00000158863	FAM160B2	0	1	1	2	protein_coding	0	-1.02432	0	0	0	0
ENSG00000134686	PHC2	0	1	1	2	protein_coding	1.24438	-1.02532	0	0	0	0
ENSG00000130844	ZNF331	1	1	0	2	protein_coding	0	-1.02546	0	0	0	0
ENSG00000088881	EBF4	1	1	0	2	protein_coding	0	-1.02838	0	0	0	0
ENSG00000172889	EGFL7	1	1	0	2	protein_coding	-2.25406	-1.02872	0	0	0	0
ENSG00000205464	ATP6AP1L	1	1	0	2	protein_coding	-1.02762	-1.02909	0	0	0	0
ENSG00000130066	SAT1	1	1	0	2	protein_coding	0	-1.02983	0	0	0	0
ENSG00000197429	IPP	0	1	1	2	protein_coding	0	-1.03021	0	0	0	0
ENSG00000164683	HEY1	1	1	0	2	protein_coding	1.6294	-1.03026	0	0	0	0
ENSG00000166575	TMEM135	1	0	1	2	protein_coding	0	-1.03061	0	0	0	0
ENSG00000142347	MYO1F	1	1	0	2	protein_coding	2.0893	-1.03073	0	0	0	0
ENSG00000160781	PAQR6	1	1	0	2	protein_coding	-2.59743	-1.03074	0	0	0	0
ENSG00000203880	PCMTD2	1	0	1	2	protein_coding	0	-1.03344	0	0	0	0
ENSG00000136997	MYC	0	1	1	2	protein_coding	3.0297	-1.03359	0	0	0	0
ENSG00000140931	CMTM3	1	0	1	2	protein_coding	3.36549	-1.03416	0	0	0	0
ENSG00000138606	SHF	1	0	1	2	protein_coding	0	-1.03509	0	0	0	0
ENSG00000169783	LINGO1	1	1	0	2	protein_coding	-1.9984	-1.03598	0	0	0	0
ENSG00000080644	CHRNA3	1	1	0	2	protein_coding	1.92434	-1.03657	0	0	0	0
ENSG00000160097	FNDC5	1	0	1	2	protein_coding	-2.16782	-1.03718	0	0	0	0
ENSG00000224389	C4B	1	1	0	2	protein_coding	5.36039	-1.0377	0	0	0	0
ENSG00000137331	IER3	1	1	0	2	protein_coding	1.48337	-1.03779	0	0	0	0
ENSG00000137710	RDX	0	1	1	2	protein_coding	1.61099	-1.03833	0	0	0	0
ENSG00000163453	IGFBP7	1	0	1	2	protein_coding	2.99851	-1.04062	0	0	0	0
ENSG00000125945	ZNF436	1	1	0	2	protein_coding	1.38212	-1.04127	0	0	0	0
ENSG00000137070	IL11RA	0	1	1	2	protein_coding	0	-1.04188	0	0	0	0
ENSG00000012171	SEMA3B	1	1	0	2	protein_coding	-1.24311	-1.04279	0	0	0	0
ENSG00000148400	NOTCH1	1	1	0	2	protein_coding	1.21748	-1.04896	0	0	0	0
ENSG00000136205	TNS3	1	1	0	2	protein_coding	0	-1.05094	0	0	0	0
ENSG00000101104	PABPC1L	1	0	1	2	protein_coding	1.17787	-1.05179	0	0	0	0
ENSG00000104267	CA2	1	1	0	2	protein_coding	1.3442	-1.05221	0	0	0	0
ENSG00000213809	KLRK1	1	1	0	2	protein_coding	1.08363	-1.05333	0	0	0	0
ENSG00000175899	A2M	1	1	0	2	protein_coding	2.43057	-1.05789	0	0	0	0
ENSG00000162522	KIAA1522	1	0	1	2	protein_coding	-1.74931	-1.06508	0	0	0	0
ENSG00000079215	SLC1A3	1	1	0	2	protein_coding	0	-1.0656	0	0	0	0
ENSG00000167549	CORO6	0	1	1	2	protein_coding	-5.80133	-1.06882	0	0	0	0
ENSG00000166682	TMPRSS5	1	1	0	2	protein_coding	0	-1.07448	0	0	0	0
ENSG00000168477	TNXB	1	1	0	2	protein_coding	0	-1.07691	0	0	0	0
ENSG00000109738	GLRB	1	1	0	2	protein_coding	-1.92895	-1.07834	0	0	0	0
ENSG00000065717	TLE2	1	1	0	2	protein_coding	0	-1.08626	0	0	0	0
ENSG00000173531	MST1	1	1	0	2	protein_coding	0	-1.09325	0	0	0	0
ENSG00000255690	TRIL	1	1	0	2	protein_coding	0	-1.09391	0	0	0	0
ENSG00000164318	EGFLAM	0	1	1	2	protein_coding	2.57762	-1.09508	0	0	0	0
ENSG00000075223	SEMA3C	0	1	1	2	protein_coding	0	-1.09954	0	0	0	0
ENSG00000141314	RHBDL3	1	1	0	2	protein_coding	-1.53532	-1.12926	0	0	0	0
ENSG00000070731	ST6GALNAC2	1	1	0	2	protein_coding	3.50317	-1.16771	0	0	0	0
ENSG00000018625	ATP1A2	1	1	0	2	protein_coding	-1.80538	-1.30734	0	0	0	0

## Sheet: Oncogenes
AKT2
BMI1
CBFB
CDH11
EGFR
GATA2
MITF
MSI1
MSI2
MYB
NFIB
PHB
PPARG
SRC
SS18
SUZ12
TCF12
TCF3
TFEB
TTL

## Sheet: GO targets overlap
PANTHER GO-Slim Biological Process	Homo sapiens - REFLIST (20851)	upload_1 (392)	upload_1 (expected)	upload_1 (over/under)	upload_1 (fold Enrichment)	upload_1 (raw P-value)	upload_1 (FDR)
regulation of cellular response to growth factor stimulus (GO:0090287)	30	5	0.56	+	8.87	0.000429	0.0143
positive regulation of neuron differentiation (GO:0045666)	37	5	0.7	+	7.19	0.00101	0.0271
positive regulation of neurogenesis (GO:0050769)	40	5	0.75	+	6.65	0.00139	0.0333
positive regulation of nervous system development (GO:0051962)	43	5	0.81	+	6.19	0.00186	0.0413
regulation of neuron differentiation (GO:0045664)	90	9	1.69	+	5.32	9.07e-05	0.00646
regulation of neurogenesis (GO:0050767)	108	9	2.03	+	4.43	0.000324	0.0126
regulation of nervous system development (GO:0051960)	121	10	2.27	+	4.4	0.000162	0.00838
protein polyubiquitination (GO:0000209)	87	7	1.64	+	4.28	0.00179	0.0405
regulation of cell development (GO:0060284)	118	9	2.22	+	4.06	0.000592	0.0185
regulation of multicellular organismal development (GO:2000026)	177	13	3.33	+	3.91	5.52e-05	0.00633
negative regulation of transcription by RNA polymerase II (GO:0000122)	180	12	3.38	+	3.55	0.000247	0.01
regulation of cell differentiation (GO:0045595)	156	10	2.93	+	3.41	0.00106	0.0277
protein ubiquitination (GO:0016567)	166	10	3.12	+	3.2	0.00165	0.0377
protein modification by small protein conjugation (GO:0032446)	194	11	3.65	+	3.02	0.00155	0.036
regulation of developmental process (GO:0050793)	247	14	4.64	+	3.01	0.000377	0.0134
regulation of multicellular organismal process (GO:0051239)	276	15	5.19	+	2.89	0.000359	0.0132
neuron differentiation (GO:0030182)	273	14	5.13	+	2.73	0.000957	0.026
positive regulation of transcription by RNA polymerase II (GO:0045944)	345	17	6.49	+	2.62	0.000439	0.0144
protein modification by small protein conjugation or removal (GO:0070647)	287	14	5.4	+	2.59	0.0015	0.0353
generation of neurons (GO:0048699)	293	14	5.51	+	2.54	0.00181	0.0405
positive regulation of nucleobase-containing compound metabolic process (GO:0045935)	454	21	8.54	+	2.46	0.000351	0.0134
positive regulation of cellular biosynthetic process (GO:0031328)	465	21	8.74	+	2.4	0.000406	0.014
positive regulation of nucleic acid-templated transcription (GO:1903508)	421	19	7.91	+	2.4	0.000834	0.0242
positive regulation of transcription, DNA-templated (GO:0045893)	421	19	7.91	+	2.4	0.000834	0.0239
positive regulation of RNA biosynthetic process (GO:1902680)	421	19	7.91	+	2.4	0.000834	0.0236
positive regulation of biosynthetic process (GO:0009891)	468	21	8.8	+	2.39	0.000426	0.0144
positive regulation of macromolecule biosynthetic process (GO:0010557)	458	20	8.61	+	2.32	0.000746	0.0223
positive regulation of RNA metabolic process (GO:0051254)	437	19	8.22	+	2.31	0.00108	0.0277
anatomical structure morphogenesis (GO:0009653)	467	20	8.78	+	2.28	0.000888	0.0244
multicellular organism development (GO:0007275)	796	34	14.96	+	2.27	1.56e-05	0.00645
positive regulation of gene expression (GO:0010628)	481	20	9.04	+	2.21	0.00119	0.0295
positive regulation of nitrogen compound metabolic process (GO:0051173)	773	32	14.53	+	2.2	4.64e-05	0.00638
transcription by RNA polymerase II (GO:0006366)	808	33	15.19	+	2.17	5.9e-05	0.00608
positive regulation of cellular metabolic process (GO:0031325)	771	31	14.49	+	2.14	0.000127	0.00822
regulation of transcription by RNA polymerase II (GO:0006357)	772	31	14.51	+	2.14	0.000129	0.00807
positive regulation of metabolic process (GO:0009893)	819	32	15.4	+	2.08	0.000135	0.00751
positive regulation of macromolecule metabolic process (GO:0010604)	797	31	14.98	+	2.07	0.000187	0.00878
system development (GO:0048731)	704	27	13.24	+	2.04	0.000646	0.0199

## Sheet: KEGG targets overlap
Enrichment FDR	Genes in list	Total genes	Functional Category	Genes
0.0246594	10	139	Signaling pathways regulating pluripotency of stem cells	MAPK14 DVL2 AKT2 ID3 SMAD5 SMAD9 BMI1 SKIL TCF3 PCGF6
0.0358655	7	85	ErbB signaling pathway	CRKL EGFR AKT2 GAB1 PAK2 SRC NCK2
0.0358655	6	65	Mitophagy	FUNDC1 MITF SP1 SRC TFEB USP30
0.0358655	10	160	Cellular senescence	HIPK3 MAPK14 E2F3 AKT2 HIPK2 SLC25A5 PPP1CC ZFP36L1 ZFP36L2 CALM3
