# Supplementary material for: Synergism of Pro-neurogenic miRNAs&nbsp;Provides a More Effective Strategy to Target Glioma Stem Cells
Source: Research Square preprint supplement (doi:10.21203/rs.3.rs-125940/v1), 2020-12-15
Supplement: Supplementary file 5 [file 57db809d30297f2bba249b22.xlsx]

## Sheet: Sheet1
Ensembl ID	Gene Symbol	miR-124	miR-128	miR-137
ENSG00000197312	DDI2	1	1	1
ENSG00000127124	HIVEP3	1	1	1
ENSG00000163531	NFASC	1	1	1
ENSG00000082482	KCNK2	1	1	1
ENSG00000154380	ENAH	1	1	1
ENSG00000143797	MBOAT2	1	1	1
ENSG00000169016	E2F6	1	1	1
ENSG00000152518	ZFP36L2	1	1	1
ENSG00000088179	PTPN4	1	1	1
ENSG00000115159	GPD2	1	1	1
ENSG00000151090	THRB	1	1	1
ENSG00000144681	STAC	1	1	1
ENSG00000144677	CTDSPL	1	1	1
ENSG00000011198	ABHD5	1	1	1
ENSG00000164080	RAD54L2	1	1	1
ENSG00000181722	ZBTB20	1	1	1
ENSG00000172667	ZMAT3	1	1	1
ENSG00000043093	DCUN1D1	1	1	1
ENSG00000109339	MAPK10	1	1	1
ENSG00000164134	NAA15	1	1	1
ENSG00000164190	NIPBL	1	1	1
ENSG00000112893	MAN2A1	1	1	1
ENSG00000185129	PURA	1	1	1
ENSG00000070614	NDST1	1	1	1
ENSG00000155511	GRIA1	1	1	1
ENSG00000214357	NEURL1B	1	1	1
ENSG00000124782	RREB1	1	1	1
ENSG00000205269	TMEM170B	1	1	1
ENSG00000178409	BEND3	1	1	1
ENSG00000112531	QKI	1	1	1
ENSG00000112541	PDE10A	1	1	1
ENSG00000157741	UBN2	1	1	1
ENSG00000257093	DENND11	1	1	1
ENSG00000164684	ZNF704	1	1	1
ENSG00000147649	MTDH	1	1	1
ENSG00000147862	NFIB	1	1	1
ENSG00000136826	KLF4	1	1	1
ENSG00000177125	ZBTB34	1	1	1
ENSG00000126882	FAM78A	1	1	1
ENSG00000148411	NACC2	1	1	1
ENSG00000108100	CCNY	1	1	1
ENSG00000165406	MARCHF8	1	1	1
ENSG00000119927	GPAM	1	1	1
ENSG00000110315	RNF141	1	1	1
ENSG00000187079	TEAD1	1	1	1
ENSG00000179119	SPTY2D1	1	1	1
ENSG00000175264	CHST1	1	1	1
ENSG00000185742	C11orf87	1	1	1
ENSG00000137642	SORL1	1	1	1
ENSG00000070018	LRP6	1	1	1
ENSG00000151233	GXYLT1	1	1	1
ENSG00000185591	SP1	1	1	1
ENSG00000175215	CTDSP2	1	1	1
ENSG00000133985	TTC9	1	1	1
ENSG00000100596	SPTLC2	1	1	1
ENSG00000131323	TRAF3	1	1	1
ENSG00000140564	FURIN	1	1	1
ENSG00000177374	HIC1	1	1	1
ENSG00000133026	MYH10	1	1	1
ENSG00000108582	CPD	1	1	1
ENSG00000108424	KPNB1	1	1	1
ENSG00000108854	SMURF2	1	1	1
ENSG00000120063	GNA13	1	1	1
ENSG00000196628	TCF4	1	1	1
ENSG00000125834	STK35	1	1	1
ENSG00000101384	JAG1	1	1	1
ENSG00000154639	CXADR	1	1	1
ENSG00000142178	SIK1	1	1	1
ENSG00000099968	BCL2L13	1	1	1
ENSG00000099942	CRKL	1	1	1
ENSG00000100354	TNRC6B	1	1	1
ENSG00000165288	BRWD3	1	1	1
ENSG00000101888	NXT2	1	1	1
ENSG00000142611	PRDM16	0	1	1
ENSG00000116560	SFPQ	0	1	1
ENSG00000196182	STK40	0	1	1
ENSG00000163873	GRIK3	0	1	1
ENSG00000117016	RIMS3	0	1	1
ENSG00000142864	SERBP1	0	1	1
ENSG00000116761	CTH	0	1	1
ENSG00000117500	TMED5	0	1	1
ENSG00000081019	RSBN1	0	1	1
ENSG00000134247	PTGFRN	0	1	1
ENSG00000092621	PHGDH	0	1	1
ENSG00000159164	SV2A	0	1	1
ENSG00000185278	ZBTB37	0	1	1
ENSG00000117650	NEK2	0	1	1
ENSG00000143494	VASH2	0	1	1
ENSG00000135801	TAF5L	0	1	1
ENSG00000119283	TRIM67	0	1	1
ENSG00000054267	ARID4B	0	1	1
ENSG00000176887	SOX11	0	1	1
ENSG00000084676	NCOA1	0	1	1
ENSG00000213626	LBH	0	1	1
ENSG00000183023	SLC8A1	0	1	1
ENSG00000057935	MTA3	0	1	1
ENSG00000179915	NRXN1	0	1	1
ENSG00000198380	GFPT1	0	1	1
ENSG00000119042	SATB2	0	1	1
ENSG00000155744	FAM126B	0	1	1
ENSG00000144426	NBEAL1	0	1	1
ENSG00000184182	UBE2F	0	1	1
ENSG00000157103	SLC6A1	0	1	1
ENSG00000131389	SLC6A6	0	1	1
ENSG00000272886	DCP1A	0	1	1
ENSG00000163605	PPP4R2	0	1	1
ENSG00000057019	DCBLD2	0	1	1
ENSG00000114439	BBX	0	1	1
ENSG00000173706	HEG1	0	1	1
ENSG00000169282	KCNAB1	0	1	1
ENSG00000154310	TNIK	0	1	1
ENSG00000197386	HTT	0	1	1
ENSG00000078140	UBE2K	0	1	1
ENSG00000109189	USP46	0	1	1
ENSG00000134853	PDGFRA	0	1	1
ENSG00000138756	BMP2K	0	1	1
ENSG00000170522	ELOVL6	0	1	1
ENSG00000145391	SETD7	0	1	1
ENSG00000109670	FBXW7	0	1	1
ENSG00000121207	LRAT	0	1	1
ENSG00000078295	ADCY2	0	1	1
ENSG00000113594	LIFR	0	1	1
ENSG00000164327	RICTOR	0	1	1
ENSG00000155545	MIER3	0	1	1
ENSG00000145632	PLK2	0	1	1
ENSG00000113595	TRIM23	0	1	1
ENSG00000113391	FAM172A	0	1	1
ENSG00000134986	NREP	0	1	1
ENSG00000113368	LMNB1	0	1	1
ENSG00000137266	SLC22A23	0	1	1
ENSG00000172348	RCAN2	0	1	1
ENSG00000198087	CD2AP	0	1	1
ENSG00000112208	BAG2	0	1	1
ENSG00000172461	FUT9	0	1	1
ENSG00000277443	MARCKS	0	1	1
ENSG00000105866	SP4	0	1	1
ENSG00000078399	HOXA9	0	1	1
ENSG00000146648	EGFR	0	1	1
ENSG00000183166	CALN1	0	1	1
ENSG00000158528	PPP1R9A	0	1	1
ENSG00000164715	LMTK2	0	1	1
ENSG00000105976	MET	0	1	1
ENSG00000104341	LAPTM4B	0	1	1
ENSG00000132294	EFR3A	0	1	1
ENSG00000198963	RORB	0	1	1
ENSG00000165023	DIRAS2	0	1	1
ENSG00000136928	GABBR2	0	1	1
ENSG00000148154	UGCG	0	1	1
ENSG00000136848	DAB2IP	0	1	1
ENSG00000077943	ITGA8	0	1	1
ENSG00000035403	VCL	0	1	1
ENSG00000107864	CPEB3	0	1	1
ENSG00000107443	CCNJ	0	1	1
ENSG00000196233	LCOR	0	1	1
ENSG00000138166	DUSP5	0	1	1
ENSG00000110786	PTPN5	0	1	1
ENSG00000168959	GRM5	0	1	1
ENSG00000149289	ZC3H12C	0	1	1
ENSG00000172572	PDE3A	0	1	1
ENSG00000211455	STK38L	0	1	1
ENSG00000170456	DENND5B	0	1	1
ENSG00000139174	PRICKLE1	0	1	1
ENSG00000139636	LMBR1L	0	1	1
ENSG00000161642	ZNF385A	0	1	1
ENSG00000161638	ITGA5	0	1	1
ENSG00000123360	PDE1B	0	1	1
ENSG00000165891	E2F7	0	1	1
ENSG00000067715	SYT1	0	1	1
ENSG00000070961	ATP2B1	0	1	1
ENSG00000089159	PXN	0	1	1
ENSG00000135097	MSI1	0	1	1
ENSG00000090975	PITPNM2	0	1	1
ENSG00000102580	DNAJC3	0	1	1
ENSG00000125266	EFNB2	0	1	1
ENSG00000165355	FBXO33	0	1	1
ENSG00000139921	TMX1	0	1	1
ENSG00000053254	FOXN3	0	1	1
ENSG00000205476	CCDC85C	0	1	1
ENSG00000066629	EML1	0	1	1
ENSG00000169918	OTUD7A	0	1	1
ENSG00000069667	RORA	0	1	1
ENSG00000157890	MEGF11	0	1	1
ENSG00000140538	NTRK3	0	1	1
ENSG00000184207	PGP	0	1	1
ENSG00000103342	GSPT1	0	1	1
ENSG00000103494	RPGRIP1L	0	1	1
ENSG00000140937	CDH11	0	1	1
ENSG00000168748	CA7	0	1	1
ENSG00000103066	PLA2G15	0	1	1
ENSG00000040199	PHLPP2	0	1	1
ENSG00000004975	DVL2	0	1	1
ENSG00000178691	SUZ12	0	1	1
ENSG00000125686	MED1	0	1	1
ENSG00000094804	CDC6	0	1	1
ENSG00000108960	MMD	0	1	1
ENSG00000153944	MSI2	0	1	1
ENSG00000108389	MTMR4	0	1	1
ENSG00000175175	PPM1E	0	1	1
ENSG00000136478	TEX2	0	1	1
ENSG00000132475	H3-3B	0	1	1
ENSG00000141380	SS18	0	1	1
ENSG00000172466	ZNF24	0	1	1
ENSG00000170677	SOCS6	0	1	1
ENSG00000166342	NETO1	0	1	1
ENSG00000099617	EFNA2	0	1	1
ENSG00000176490	DIRAS1	0	1	1
ENSG00000105738	SIPA1L3	0	1	1
ENSG00000142549	IGLON5	0	1	1
ENSG00000101463	SYNDIG1	0	1	1
ENSG00000025293	PHF20	0	1	1
ENSG00000124207	CSE1L	0	1	1
ENSG00000149679	CABLES2	0	1	1
ENSG00000154736	ADAMTS5	0	1	1
ENSG00000157617	C2CD2	0	1	1
ENSG00000160216	AGPAT3	0	1	1
ENSG00000243902	FP325335.1	0	1	1
ENSG00000166897	ELFN2	0	1	1
ENSG00000172346	CSDC2	0	1	1
ENSG00000067992	PDK3	0	1	1
ENSG00000180182	MED14	0	1	1
ENSG00000065923	SLC9A7	0	1	1
ENSG00000131174	COX7B	0	1	1
ENSG00000085185	BCORL1	0	1	1
ENSG00000187961	KLHL17	1	0	1
ENSG00000157933	SKI	1	0	1
ENSG00000116237	ICMT	1	0	1
ENSG00000188786	MTF1	1	0	1
ENSG00000159658	EFCAB14	1	0	1
ENSG00000162437	RAVER2	1	0	1
ENSG00000172260	NEGR1	1	0	1
ENSG00000117174	ZNHIT6	1	0	1
ENSG00000143013	LMO4	1	0	1
ENSG00000065243	PKN2	1	0	1
ENSG00000137942	FNBP1L	1	0	1
ENSG00000213281	NRAS	1	0	1
ENSG00000117479	SLC19A2	1	0	1
ENSG00000117707	PROX1	1	0	1
ENSG00000162909	CAPN2	1	0	1
ENSG00000143771	CNIH4	1	0	1
ENSG00000198626	RYR2	1	0	1
ENSG00000163032	VSNL1	1	0	1
ENSG00000143970	ASXL2	1	0	1
ENSG00000115808	STRN	1	0	1
ENSG00000059728	MXD1	1	0	1
ENSG00000187605	TET3	1	0	1
ENSG00000168887	C2orf68	1	0	1
ENSG00000153094	BCL2L11	1	0	1
ENSG00000153214	TMEM87B	1	0	1
ENSG00000114999	TTL	1	0	1
ENSG00000115112	TFCP2L1	1	0	1
ENSG00000211460	TSN	1	0	1
ENSG00000173349	SFT2D3	1	0	1
ENSG00000157827	FMNL2	1	0	1
ENSG00000136536	MARCHF7	1	0	1
ENSG00000082438	COBLL1	1	0	1
ENSG00000217236	SP9	1	0	1
ENSG00000187231	SESTD1	1	0	1
ENSG00000065413	ANKRD44	1	0	1
ENSG00000173166	RAPH1	1	0	1
ENSG00000115425	PECR	1	0	1
ENSG00000196220	SRGAP3	1	0	1
ENSG00000033867	SLC4A7	1	0	1
ENSG00000144642	RBMS3	1	0	1
ENSG00000172939	OXSR1	1	0	1
ENSG00000163812	ZDHHC3	1	0	1
ENSG00000144730	IL17RD	1	0	1
ENSG00000187098	MITF	1	0	1
ENSG00000163428	LRRC58	1	0	1
ENSG00000163430	FSTL1	1	0	1
ENSG00000163848	ZNF148	1	0	1
ENSG00000163884	KLF15	1	0	1
ENSG00000163785	RYK	1	0	1
ENSG00000175066	GK5	1	0	1
ENSG00000114127	XRN1	1	0	1
ENSG00000181744	DIPK2A	1	0	1
ENSG00000120742	SERP1	1	0	1
ENSG00000163900	TMEM41A	1	0	1
ENSG00000185818	NAT8L	1	0	1
ENSG00000173011	TADA2B	1	0	1
ENSG00000169851	PCDH7	1	0	1
ENSG00000065882	TBC1D1	1	0	1
ENSG00000064042	LIMCH1	1	0	1
ENSG00000109220	CHIC2	1	0	1
ENSG00000170185	USP38	1	0	1
ENSG00000164164	OTUD4	1	0	1
ENSG00000052795	FNIP2	1	0	1
ENSG00000182552	RWDD4	1	0	1
ENSG00000249915	PDCD6	1	0	1
ENSG00000133401	PDZD2	1	0	1
ENSG00000113387	SUB1	1	0	1
ENSG00000095015	MAP3K1	1	0	1
ENSG00000113448	PDE4D	1	0	1
ENSG00000113356	POLR3G	1	0	1
ENSG00000153922	CHD1	1	0	1
ENSG00000172869	DMXL1	1	0	1
ENSG00000064651	SLC12A2	1	0	1
ENSG00000053108	FSTL4	1	0	1
ENSG00000152700	SAR1B	1	0	1
ENSG00000158458	NRG2	1	0	1
ENSG00000176087	SLC35A4	1	0	1
ENSG00000155850	SLC26A2	1	0	1
ENSG00000168246	UBTD2	1	0	1
ENSG00000164466	SFXN1	1	0	1
ENSG00000161021	MAML1	1	0	1
ENSG00000112183	RBM24	1	0	1
ENSG00000161904	LEMD2	1	0	1
ENSG00000001561	ENPP4	1	0	1
ENSG00000065308	TRAM2	1	0	1
ENSG00000112200	ZNF451	1	0	1
ENSG00000146247	PHIP	1	0	1
ENSG00000135316	SYNCRIP	1	0	1
ENSG00000025039	RRAGD	1	0	1
ENSG00000112182	BACH2	1	0	1
ENSG00000112234	FBXL4	1	0	1
ENSG00000123552	USP45	1	0	1
ENSG00000111860	CEP85L	1	0	1
ENSG00000136238	RAC1	1	0	1
ENSG00000106392	C1GALT1	1	0	1
ENSG00000106546	AHR	1	0	1
ENSG00000070882	OSBPL3	1	0	1
ENSG00000243335	KCTD7	1	0	1
ENSG00000105810	CDK6	1	0	1
ENSG00000105948	TTC26	1	0	1
ENSG00000106462	EZH2	1	0	1
ENSG00000155189	AGPAT5	1	0	1
ENSG00000003989	SLC7A2	1	0	1
ENSG00000157168	NRG1	1	0	1
ENSG00000171316	CHD7	1	0	1
ENSG00000185728	YTHDF3	1	0	1
ENSG00000205268	PDE7A	1	0	1
ENSG00000140396	NCOA2	1	0	1
ENSG00000104369	JPH1	1	0	1
ENSG00000048392	RRM2B	1	0	1
ENSG00000104447	TRPS1	1	0	1
ENSG00000147724	FAM135B	1	0	1
ENSG00000119139	TJP2	1	0	1
ENSG00000148082	SHC3	1	0	1
ENSG00000165185	KIAA1958	1	0	1
ENSG00000165995	CACNB2	1	0	1
ENSG00000197321	SVIL	1	0	1
ENSG00000099250	NRP1	1	0	1
ENSG00000177283	FZD8	1	0	1
ENSG00000122877	EGR2	1	0	1
ENSG00000148730	EIF4EBP2	1	0	1
ENSG00000166224	SGPL1	1	0	1
ENSG00000107742	SPOCK2	1	0	1
ENSG00000138279	ANXA7	1	0	1
ENSG00000180628	PCGF5	1	0	1
ENSG00000119912	IDE	1	0	1
ENSG00000196865	NHLRC2	1	0	1
ENSG00000110047	EHD1	1	0	1
ENSG00000162105	SHANK2	1	0	1
ENSG00000077458	FAM76B	1	0	1
ENSG00000170145	SIK2	1	0	1
ENSG00000151491	EPS8	1	0	1
ENSG00000060982	BCAT1	1	0	1
ENSG00000123094	RASSF8	1	0	1
ENSG00000012822	CALCOCO1	1	0	1
ENSG00000166908	PIP4K2C	1	0	1
ENSG00000174106	LEMD3	1	0	1
ENSG00000166225	FRS2	1	0	1
ENSG00000091039	OSBPL8	1	0	1
ENSG00000135093	USP30	1	0	1
ENSG00000076513	ANKRD13A	1	0	1
ENSG00000196850	PPTC7	1	0	1
ENSG00000186815	TPCN1	1	0	1
ENSG00000176834	VSIG10	1	0	1
ENSG00000110987	BCL7A	1	0	1
ENSG00000175727	MLXIP	1	0	1
ENSG00000132953	XPO4	1	0	1
ENSG00000182957	SPATA13	1	0	1
ENSG00000228741	AL445985.1	1	0	1
ENSG00000178695	KCTD12	1	0	1
ENSG00000136160	EDNRB	1	0	1
ENSG00000134874	DZIP1	1	0	1
ENSG00000152767	FARP1	1	0	1
ENSG00000068650	ATP11A	1	0	1
ENSG00000179454	KLHL28	1	0	1
ENSG00000198252	STYX	1	0	1
ENSG00000165417	GTF2A1	1	0	1
ENSG00000100697	DICER1	1	0	1
ENSG00000127152	BCL11B	1	0	1
ENSG00000170113	NIPA1	1	0	1
ENSG00000104067	TJP1	1	0	1
ENSG00000104154	SLC30A4	1	0	1
ENSG00000128872	TMOD2	1	0	1
ENSG00000157470	FAM81A	1	0	1
ENSG00000138604	GLCE	1	0	1
ENSG00000169330	MINAR1	1	0	1
ENSG00000140548	ZNF710	1	0	1
ENSG00000068305	MEF2A	1	0	1
ENSG00000162104	ADCY9	1	0	1
ENSG00000126603	GLIS2	1	0	1
ENSG00000237515	SHISA9	1	0	1
ENSG00000188215	DCUN1D3	1	0	1
ENSG00000188322	SBK1	1	0	1
ENSG00000205423	CNEP1R1	1	0	1
ENSG00000087253	LPCAT2	1	0	1
ENSG00000166747	AP1G1	1	0	1
ENSG00000224470	ATXN1L	1	0	1
ENSG00000197879	MYO1C	1	0	1
ENSG00000174238	PITPNA	1	0	1
ENSG00000065559	MAP2K4	1	0	1
ENSG00000083290	ULK2	1	0	1
ENSG00000182963	GJC1	1	0	1
ENSG00000108924	HLF	1	0	1
ENSG00000108984	MAP2K6	1	0	1
ENSG00000128791	TWSG1	1	0	1
ENSG00000101752	MIB1	1	0	1
ENSG00000154059	IMPACT	1	0	1
ENSG00000141429	GALNT1	1	0	1
ENSG00000141622	RNF165	1	0	1
ENSG00000011304	PTBP1	1	0	1
ENSG00000071564	TCF3	1	0	1
ENSG00000178951	ZBTB7A	1	0	1
ENSG00000065989	PDE4A	1	0	1
ENSG00000008441	NFIX	1	0	1
ENSG00000105221	AKT2	1	0	1
ENSG00000089195	TRMT6	1	0	1
ENSG00000182621	PLCB1	1	0	1
ENSG00000244462	RBM12	1	0	1
ENSG00000158445	KCNB1	1	0	1
ENSG00000101096	NFATC2	1	0	1
ENSG00000124225	PMEPA1	1	0	1
ENSG00000154642	C21orf91	1	0	1
ENSG00000157540	DYRK1A	1	0	1
ENSG00000184792	OSBP2	1	0	1
ENSG00000196576	PLXNB2	1	0	1
ENSG00000146938	NLGN4X	1	0	1
ENSG00000215301	DDX3X	1	0	1
ENSG00000181704	YIPF6	1	0	1
ENSG00000133131	MORC4	1	0	1
ENSG00000101935	AMMECR1	1	0	1
ENSG00000126016	AMOT	1	0	1
ENSG00000171388	APLN	1	0	1
ENSG00000169057	MECP2	1	0	1
ENSG00000130827	PLXNA3	1	0	1
ENSG00000169598	DFFB	0	0	1
ENSG00000049239	H6PD	0	0	1
ENSG00000120948	TARDBP	0	0	1
ENSG00000159339	PADI4	0	0	1
ENSG00000162542	TMCO4	0	0	1
ENSG00000162545	CAMK2N1	0	0	1
ENSG00000070831	CDC42	0	0	1
ENSG00000004487	KDM1A	0	0	1
ENSG00000169641	LUZP1	0	0	1
ENSG00000142676	RPL11	0	0	1
ENSG00000204138	PHACTR4	0	0	1
ENSG00000180198	RCC1	0	0	1
ENSG00000120656	TAF12	0	0	1
ENSG00000162511	LAPTM5	0	0	1
ENSG00000084628	NKAIN1	0	0	1
ENSG00000092853	CLSPN	0	0	1
ENSG00000183386	FHL3	0	0	1
ENSG00000066136	NFYC	0	0	1
ENSG00000177181	RIMKLA	0	0	1
ENSG00000065978	YBX1	0	0	1
ENSG00000066322	ELOVL1	0	0	1
ENSG00000066135	KDM4A	0	0	1
ENSG00000126091	ST3GAL3	0	0	1
ENSG00000196517	SLC6A9	0	0	1
ENSG00000159592	GPBP1L1	0	0	1
ENSG00000117461	PIK3R3	0	0	1
ENSG00000117481	NSUN4	0	0	1
ENSG00000123472	ATPAF1	0	0	1
ENSG00000116157	GPX7	0	0	1
ENSG00000157216	SSBP3	0	0	1
ENSG00000132854	KANK4	0	0	1
ENSG00000125703	ATG4C	0	0	1
ENSG00000142856	ITGB3BP	0	0	1
ENSG00000213625	LEPROT	0	0	1
ENSG00000142892	PIGK	0	0	1
ENSG00000117155	SSX2IP	0	0	1
ENSG00000055732	MCOLN3	0	0	1
ENSG00000162645	GBP2	0	0	1
ENSG00000162664	ZNF326	0	0	1
ENSG00000162669	HFM1	0	0	1
ENSG00000122484	RPAP2	0	0	1
ENSG00000117505	DR1	0	0	1
ENSG00000172339	ALG14	0	0	1
ENSG00000152078	TLCD4	0	0	1
ENSG00000181656	GPR88	0	0	1
ENSG00000060718	COL11A1	0	0	1
ENSG00000121957	GPSM2	0	0	1
ENSG00000134243	SORT1	0	0	1
ENSG00000168710	AHCYL1	0	0	1
ENSG00000197106	SLC6A17	0	0	1
ENSG00000177301	KCNA2	0	0	1
ENSG00000143079	CTTNBP2NL	0	0	1
ENSG00000197323	TRIM33	0	0	1
ENSG00000131791	PRKAB2	0	0	1
ENSG00000143376	SNX27	0	0	1
ENSG00000198837	DENND4B	0	0	1
ENSG00000143590	EFNA3	0	0	1
ENSG00000116539	ASH1L	0	0	1
ENSG00000132716	DCAF8	0	0	1
ENSG00000143153	ATP1B1	0	0	1
ENSG00000094963	FMO2	0	0	1
ENSG00000075391	RASAL2	0	0	1
ENSG00000116199	FAM20B	0	0	1
ENSG00000073756	PTGS2	0	0	1
ENSG00000162630	B3GALT2	0	0	1
ENSG00000118193	KIF14	0	0	1
ENSG00000117139	KDM5B	0	0	1
ENSG00000159346	ADIPOR1	0	0	1
ENSG00000058673	ZC3H11A	0	0	1
ENSG00000182004	SNRPE	0	0	1
ENSG00000133059	DSTYK	0	0	1
ENSG00000158715	SLC45A3	0	0	1
ENSG00000069275	NUCKS1	0	0	1
ENSG00000133065	SLC41A1	0	0	1
ENSG00000076356	PLXNA2	0	0	1
ENSG00000143473	KCNH1	0	0	1
ENSG00000123684	LPGAT1	0	0	1
ENSG00000143476	DTL	0	0	1
ENSG00000152104	PTPN14	0	0	1
ENSG00000196482	ESRRG	0	0	1
ENSG00000092969	TGFB2	0	0	1
ENSG00000143507	DUSP10	0	0	1
ENSG00000143776	CDC42BPA	0	0	1
ENSG00000116991	SIPA1L2	0	0	1
ENSG00000285053	TBCE	0	0	1
ENSG00000284770	TBCE	0	0	1
ENSG00000162885	B3GALNT2	0	0	1
ENSG00000077585	GPR137B	0	0	1
ENSG00000174371	EXO1	0	0	1
ENSG00000203667	COX20	0	0	1
ENSG00000153187	HNRNPU	0	0	1
ENSG00000172059	KLF11	0	0	1
ENSG00000196208	GREB1	0	0	1
ENSG00000162981	LRATD1	0	0	1
ENSG00000163029	SMC6	0	0	1
ENSG00000119772	DNMT3A	0	0	1
ENSG00000138073	PREB	0	0	1
ENSG00000119760	SUPT7L	0	0	1
ENSG00000213639	PPP1CB	0	0	1
ENSG00000119812	FAM98A	0	0	1
ENSG00000115825	PRKD3	0	0	1
ENSG00000138061	CYP1B1	0	0	1
ENSG00000162878	PKDCC	0	0	1
ENSG00000095002	MSH2	0	0	1
ENSG00000169764	UGP2	0	0	1
ENSG00000204923	FBXO48	0	0	1
ENSG00000163235	TGFA	0	0	1
ENSG00000144040	SFXN5	0	0	1
ENSG00000163013	FBXO41	0	0	1
ENSG00000065911	MTHFD2	0	0	1
ENSG00000168874	ATOH8	0	0	1
ENSG00000153561	RMND5A	0	0	1
ENSG00000115042	FAHD2A	0	0	1
ENSG00000115526	CHST10	0	0	1
ENSG00000115539	PDCL3	0	0	1
ENSG00000071051	NCK2	0	0	1
ENSG00000153201	RANBP2	0	0	1
ENSG00000188177	ZC3H6	0	0	1
ENSG00000115762	PLEKHB2	0	0	1
ENSG00000176771	NCKAP5	0	0	1
ENSG00000144224	UBXN4	0	0	1
ENSG00000076003	MCM6	0	0	1
ENSG00000144227	NXPH2	0	0	1
ENSG00000121964	GTDC1	0	0	1
ENSG00000135999	EPC2	0	0	1
ENSG00000187123	LYPD6	0	0	1
ENSG00000241399	CD302	0	0	1
ENSG00000115271	GCA	0	0	1
ENSG00000136531	SCN2A	0	0	1
ENSG00000115806	GORASP2	0	0	1
ENSG00000170144	HNRNPA3	0	0	1
ENSG00000144331	ZNF385B	0	0	1
ENSG00000170396	ZNF804A	0	0	1
ENSG00000138448	ITGAV	0	0	1
ENSG00000064989	CALCRL	0	0	1
ENSG00000144366	GULP1	0	0	1
ENSG00000151690	MFSD6	0	0	1
ENSG00000138386	NAB1	0	0	1
ENSG00000128641	MYO1B	0	0	1
ENSG00000162944	RFTN2	0	0	1
ENSG00000138439	FAM117B	0	0	1
ENSG00000163596	ICA1L	0	0	1
ENSG00000114948	ADAM23	0	0	1
ENSG00000118263	KLF7	0	0	1
ENSG00000178568	ERBB4	0	0	1
ENSG00000115461	IGFBP5	0	0	1
ENSG00000116106	EPHA4	0	0	1
ENSG00000153827	TRIP12	0	0	1
ENSG00000157087	ATP2B2	0	0	1
ENSG00000197548	ATG7	0	0	1
ENSG00000154764	WNT7A	0	0	1
ENSG00000131370	SH3BP5	0	0	1
ENSG00000114166	KAT2B	0	0	1
ENSG00000174748	RPL15	0	0	1
ENSG00000163527	STT3B	0	0	1
ENSG00000163539	CLASP2	0	0	1
ENSG00000170248	PDCD6IP	0	0	1
ENSG00000114853	ZBTB47	0	0	1
ENSG00000160796	NBEAL2	0	0	1
ENSG00000173402	DAG1	0	0	1
ENSG00000164061	BSN	0	0	1
ENSG00000168268	NT5DC2	0	0	1
ENSG00000163681	SLMAP	0	0	1
ENSG00000163686	ABHD6	0	0	1
ENSG00000168291	PDHB	0	0	1
ENSG00000285258	None	0	0	1
ENSG00000163635	ATXN7	0	0	1
ENSG00000144747	TMF1	0	0	1
ENSG00000144744	UBA3	0	0	1
ENSG00000114861	FOXP1	0	0	1
ENSG00000163412	EIF4E3	0	0	1
ENSG00000175161	CADM2	0	0	1
ENSG00000175105	ZNF654	0	0	1
ENSG00000182504	CEP97	0	0	1
ENSG00000144824	PHLDB2	0	0	1
ENSG00000184307	ZDHHC23	0	0	1
ENSG00000153767	GTF2E1	0	0	1
ENSG00000114626	ABTB1	0	0	1
ENSG00000074416	MGLL	0	0	1
ENSG00000182923	CEP63	0	0	1
ENSG00000114107	CEP70	0	0	1
ENSG00000177311	ZBTB38	0	0	1
ENSG00000120756	PLS1	0	0	1
ENSG00000071794	HLTF	0	0	1
ENSG00000169908	TM4SF1	0	0	1
ENSG00000196428	TSC22D2	0	0	1
ENSG00000114850	SSR3	0	0	1
ENSG00000113810	SMC4	0	0	1
ENSG00000163536	SERPINI1	0	0	1
ENSG00000136603	SKIL	0	0	1
ENSG00000013297	CLDN11	0	0	1
ENSG00000114346	ECT2	0	0	1
ENSG00000197584	KCNMB2	0	0	1
ENSG00000145198	VWA5B2	0	0	1
ENSG00000163882	POLR2H	0	0	1
ENSG00000244405	ETV5	0	0	1
ENSG00000058866	DGKG	0	0	1
ENSG00000114331	ACAP2	0	0	1
ENSG00000180370	PAK2	0	0	1
ENSG00000168993	CPLX1	0	0	1
ENSG00000159692	CTBP1	0	0	1
ENSG00000063978	RNF4	0	0	1
ENSG00000168824	NSG1	0	0	1
ENSG00000091490	SEL1L3	0	0	1
ENSG00000168214	RBPJ	0	0	1
ENSG00000109680	TBC1D19	0	0	1
ENSG00000181826	RELL1	0	0	1
ENSG00000109790	KLHL5	0	0	1
ENSG00000163682	RPL9	0	0	1
ENSG00000121892	PDS5A	0	0	1
ENSG00000109133	TMEM33	0	0	1
ENSG00000157404	KIT	0	0	1
ENSG00000109255	NMU	0	0	1
ENSG00000145242	EPHA5	0	0	1
ENSG00000083896	YTHDC1	0	0	1
ENSG00000118816	CCNI	0	0	1
ENSG00000138764	CCNG2	0	0	1
ENSG00000145284	SCD5	0	0	1
ENSG00000189308	LIN54	0	0	1
ENSG00000138641	HERC3	0	0	1
ENSG00000152208	GRID2	0	0	1
ENSG00000138778	CENPE	0	0	1
ENSG00000168772	CXXC4	0	0	1
ENSG00000164109	MAD2L1	0	0	1
ENSG00000153132	CLGN	0	0	1
ENSG00000179387	ELMOD2	0	0	1
ENSG00000170153	RNF150	0	0	1
ENSG00000109452	INPP4B	0	0	1
ENSG00000170390	DCLK2	0	0	1
ENSG00000109472	CPE	0	0	1
ENSG00000145439	CBR4	0	0	1
ENSG00000164120	HPGD	0	0	1
ENSG00000129128	SPCS3	0	0	1
ENSG00000109674	NEIL3	0	0	1
ENSG00000151718	WWC2	0	0	1
ENSG00000168556	ING2	0	0	1
ENSG00000164305	CASP3	0	0	1
ENSG00000109762	SNX25	0	0	1
ENSG00000154553	PDLIM3	0	0	1
ENSG00000154556	SORBS2	0	0	1
ENSG00000164342	TLR3	0	0	1
ENSG00000109794	FAM149A	0	0	1
ENSG00000112877	CEP72	0	0	1
ENSG00000071539	TRIP13	0	0	1
ENSG00000142319	SLC6A3	0	0	1
ENSG00000183580	FBXL7	0	0	1
ENSG00000113361	CDH6	0	0	1
ENSG00000132356	PRKAA1	0	0	1
ENSG00000198865	CCDC152	0	0	1
ENSG00000172239	PAIP1	0	0	1
ENSG00000169067	ACTBL2	0	0	1
ENSG00000164197	RNF180	0	0	1
ENSG00000186479	RGS7BP	0	0	1
ENSG00000197860	SGTB	0	0	1
ENSG00000145734	BDP1	0	0	1
ENSG00000164252	AGGF1	0	0	1
ENSG00000085365	SCAMP1	0	0	1
ENSG00000145685	LHFPL2	0	0	1
ENSG00000113273	ARSB	0	0	1
ENSG00000152409	JMY	0	0	1
ENSG00000039319	ZFYVE16	0	0	1
ENSG00000228716	DHFR	0	0	1
ENSG00000145687	SSBP2	0	0	1
ENSG00000164176	EDIL3	0	0	1
ENSG00000164291	ARSK	0	0	1
ENSG00000174132	FAM174A	0	0	1
ENSG00000145743	FBXL17	0	0	1
ENSG00000152495	CAMK4	0	0	1
ENSG00000168938	PPIC	0	0	1
ENSG00000173926	MARCHF3	0	0	1
ENSG00000138829	FBN2	0	0	1
ENSG00000217128	FNIP1	0	0	1
ENSG00000164398	ACSL6	0	0	1
ENSG00000145824	CXCL14	0	0	1
ENSG00000164620	RELL2	0	0	1
ENSG00000091009	RBM27	0	0	1
ENSG00000176049	JAKMIP2	0	0	1
ENSG00000113712	CSNK1A1	0	0	1
ENSG00000070808	CAMK2A	0	0	1
ENSG00000196743	GM2A	0	0	1
ENSG00000177556	ATOX1	0	0	1
ENSG00000164332	UBLCP1	0	0	1
ENSG00000170234	PWWP2A	0	0	1
ENSG00000113645	WWC1	0	0	1
ENSG00000120137	PANK3	0	0	1
ENSG00000174705	SH3PXD2B	0	0	1
ENSG00000120129	DUSP1	0	0	1
ENSG00000113739	STC2	0	0	1
ENSG00000198055	GRK6	0	0	1
ENSG00000113758	DBN1	0	0	1
ENSG00000196670	ZFP62	0	0	1
ENSG00000124783	SSR1	0	0	1
ENSG00000197977	ELOVL2	0	0	1
ENSG00000078401	EDN1	0	0	1
ENSG00000010017	RANBP9	0	0	1
ENSG00000112149	CD83	0	0	1
ENSG00000124788	ATXN1	0	0	1
ENSG00000172197	MBOAT1	0	0	1
ENSG00000146038	DCDC2	0	0	1
ENSG00000204439	C6orf47	0	0	1
ENSG00000204394	VARS1	0	0	1
ENSG00000065029	ZNF76	0	0	1
ENSG00000096063	SRPK1	0	0	1
ENSG00000124767	GLO1	0	0	1
ENSG00000112144	CILK1	0	0	1
ENSG00000146151	HMGCLL1	0	0	1
ENSG00000151917	BEND6	0	0	1
ENSG00000118482	PHF3	0	0	1
ENSG00000065609	SNAP91	0	0	1
ENSG00000065615	CYB5R4	0	0	1
ENSG00000172469	MANEA	0	0	1
ENSG00000272398	CD24	0	0	1
ENSG00000081087	OSTM1	0	0	1
ENSG00000155111	CDK19	0	0	1
ENSG00000111832	RWDD1	0	0	1
ENSG00000111907	TPD52L1	0	0	1
ENSG00000135547	HEY2	0	0	1
ENSG00000203760	CENPW	0	0	1
ENSG00000093144	ECHDC1	0	0	1
ENSG00000034693	PEX3	0	0	1
ENSG00000120253	NUP43	0	0	1
ENSG00000130338	TULP4	0	0	1
ENSG00000112110	MRPL18	0	0	1
ENSG00000177706	FAM20C	0	0	1
ENSG00000198517	MAFK	0	0	1
ENSG00000164916	FOXK1	0	0	1
ENSG00000005108	THSD7A	0	0	1
ENSG00000122691	TWIST1	0	0	1
ENSG00000105855	ITGB8	0	0	1
ENSG00000164649	CDCA7L	0	0	1
ENSG00000136237	RAPGEF5	0	0	1
ENSG00000169193	CCDC126	0	0	1
ENSG00000086300	SNX10	0	0	1
ENSG00000006625	GGCT	0	0	1
ENSG00000122557	HERPUD2	0	0	1
ENSG00000015676	NUDCD3	0	0	1
ENSG00000146676	PURB	0	0	1
ENSG00000146731	CCT6A	0	0	1
ENSG00000091073	DTX2	0	0	1
ENSG00000127951	FGL2	0	0	1
ENSG00000006576	PHTF2	0	0	1
ENSG00000105793	GTPBP10	0	0	1
ENSG00000006453	BAIAP2L1	0	0	1
ENSG00000146830	GIGYF1	0	0	1
ENSG00000005249	PRKAR2B	0	0	1
ENSG00000173114	LRRN3	0	0	1
ENSG00000135272	MDFIC	0	0	1
ENSG00000077063	CTTNBP2	0	0	1
ENSG00000184408	KCND2	0	0	1
ENSG00000106025	TSPAN12	0	0	1
ENSG00000196937	FAM3C	0	0	1
ENSG00000008311	AASS	0	0	1
ENSG00000081803	CADPS2	0	0	1
ENSG00000128594	LRRC4	0	0	1
ENSG00000158457	TSPAN33	0	0	1
ENSG00000158467	AHCYL2	0	0	1
ENSG00000186591	UBE2H	0	0	1
ENSG00000128510	CPA4	0	0	1
ENSG00000106484	MEST	0	0	1
ENSG00000205060	SLC35B4	0	0	1
ENSG00000122786	CALD1	0	0	1
ENSG00000105894	PTN	0	0	1
ENSG00000006459	KDM7A	0	0	1
ENSG00000174469	CNTNAP2	0	0	1
ENSG00000009335	UBE3C	0	0	1
ENSG00000183117	CSMD1	0	0	1
ENSG00000154319	FAM167A	0	0	1
ENSG00000155975	VPS37A	0	0	1
ENSG00000003987	MTMR7	0	0	1
ENSG00000129422	MTUS1	0	0	1
ENSG00000168481	LGI3	0	0	1
ENSG00000104635	SLC39A14	0	0	1
ENSG00000159167	STC1	0	0	1
ENSG00000277586	NEFL	0	0	1
ENSG00000104765	BNIP3L	0	0	1
ENSG00000171320	ESCO2	0	0	1
ENSG00000147421	HMBOX1	0	0	1
ENSG00000120875	DUSP4	0	0	1
ENSG00000147475	ERLIN2	0	0	1
ENSG00000156735	BAG4	0	0	1
ENSG00000168615	ADAM9	0	0	1
ENSG00000104738	MCM4	0	0	1
ENSG00000168300	PCMTD1	0	0	1
ENSG00000147488	ST18	0	0	1
ENSG00000120992	LYPLA1	0	0	1
ENSG00000215114	UBXN2B	0	0	1
ENSG00000198363	ASPH	0	0	1
ENSG00000180828	BHLHE22	0	0	1
ENSG00000104442	ARMC1	0	0	1
ENSG00000066855	MTFR1	0	0	1
ENSG00000137573	SULF1	0	0	1
ENSG00000137558	PI15	0	0	1
ENSG00000121005	CRISPLD1	0	0	1
ENSG00000104375	STK3	0	0	1
ENSG00000155096	AZIN1	0	0	1
ENSG00000147650	LRP12	0	0	1
ENSG00000169946	ZFPM2	0	0	1
ENSG00000164830	OXR1	0	0	1
ENSG00000164796	CSMD3	0	0	1
ENSG00000187955	COL14A1	0	0	1
ENSG00000172167	MTBP	0	0	1
ENSG00000156795	WDYHV1	0	0	1
ENSG00000156804	FBXO32	0	0	1
ENSG00000170873	MTSS1	0	0	1
ENSG00000022567	SLC45A4	0	0	1
ENSG00000014164	ZC3H3	0	0	1
ENSG00000261678	SCRT1	0	0	1
ENSG00000106993	CDC37L1	0	0	1
ENSG00000153714	LURAP1L	0	0	1
ENSG00000120156	TEK	0	0	1
ENSG00000168913	ENHO	0	0	1
ENSG00000137094	DNAJB5	0	0	1
ENSG00000122707	RECK	0	0	1
ENSG00000122694	GLIPR2	0	0	1
ENSG00000122696	SLC25A51	0	0	1
ENSG00000083067	TRPM3	0	0	1
ENSG00000197969	VPS13A	0	0	1
ENSG00000187764	SEMA4D	0	0	1
ENSG00000196116	TDRD7	0	0	1
ENSG00000136824	SMC2	0	0	1
ENSG00000070214	SLC44A1	0	0	1
ENSG00000041982	TNC	0	0	1
ENSG00000106780	MEGF9	0	0	1
ENSG00000165209	STRBP	0	0	1
ENSG00000119414	PPP6C	0	0	1
ENSG00000119487	MAPKAP1	0	0	1
ENSG00000167081	PBX3	0	0	1
ENSG00000136859	ANGPTL2	0	0	1
ENSG00000148334	PTGES2	0	0	1
ENSG00000136816	TOR1B	0	0	1
ENSG00000160563	MED27	0	0	1
ENSG00000130635	COL5A1	0	0	1
ENSG00000015171	ZMYND11	0	0	1
ENSG00000151240	DIP2C	0	0	1
ENSG00000151461	UPF2	0	0	1
ENSG00000086475	SEPHS1	0	0	1
ENSG00000120594	PLXDC2	0	0	1
ENSG00000185875	THNSL1	0	0	1
ENSG00000151025	GPR158	0	0	1
ENSG00000148459	PDSS1	0	0	1
ENSG00000107562	CXCL12	0	0	1
ENSG00000107643	MAPK8	0	0	1
ENSG00000177613	CSTF2T	0	0	1
ENSG00000122952	ZWINT	0	0	1
ENSG00000122873	CISD1	0	0	1
ENSG00000165449	SLC16A9	0	0	1
ENSG00000072422	RHOBTB1	0	0	1
ENSG00000182010	RTKN2	0	0	1
ENSG00000181915	ADO	0	0	1
ENSG00000183230	CTNNA3	0	0	1
ENSG00000108187	PBLD	0	0	1
ENSG00000172731	LRRC20	0	0	1
ENSG00000148719	DNAJB12	0	0	1
ENSG00000196968	FUT11	0	0	1
ENSG00000119938	PPP1R3C	0	0	1
ENSG00000095564	BTAF1	0	0	1
ENSG00000108239	TBC1D12	0	0	1
ENSG00000119969	HELLS	0	0	1
ENSG00000119977	TCTN3	0	0	1
ENSG00000156374	PCGF6	0	0	1
ENSG00000043591	ADRB1	0	0	1
ENSG00000165832	TRUB1	0	0	1
ENSG00000107518	ATRNL1	0	0	1
ENSG00000148704	VAX1	0	0	1
ENSG00000019995	ZRANB1	0	0	1
ENSG00000068383	INPP5A	0	0	1
ENSG00000184524	CEND1	0	0	1
ENSG00000184545	DUSP8	0	0	1
ENSG00000110628	SLC22A18	0	0	1
ENSG00000110171	TRIM3	0	0	1
ENSG00000110321	EIF4G2	0	0	1
ENSG00000110693	SOX6	0	0	1
ENSG00000166689	PLEKHA7	0	0	1
ENSG00000110700	RPS13	0	0	1
ENSG00000129159	KCNC1	0	0	1
ENSG00000187398	LUZP2	0	0	1
ENSG00000109881	CCDC34	0	0	1
ENSG00000110436	SLC1A2	0	0	1
ENSG00000166181	API5	0	0	1
ENSG00000134571	MYBPC3	0	0	1
ENSG00000156599	ZDHHC5	0	0	1
ENSG00000204950	LRRC10B	0	0	1
ENSG00000011347	SYT7	0	0	1
ENSG00000149016	TUT1	0	0	1
ENSG00000167771	RCOR2	0	0	1
ENSG00000173457	PPP1R14B	0	0	1
ENSG00000173153	ESRRA	0	0	1
ENSG00000168067	MAP4K2	0	0	1
ENSG00000149798	CDC42EP2	0	0	1
ENSG00000173442	EHBP1L1	0	0	1
ENSG00000172638	EFEMP2	0	0	1
ENSG00000174080	CTSF	0	0	1
ENSG00000173120	KDM2A	0	0	1
ENSG00000110057	UNC93B1	0	0	1
ENSG00000162129	CLPB	0	0	1
ENSG00000054965	FAM168A	0	0	1
ENSG00000166435	XRRA1	0	0	1
ENSG00000110172	CHORDC1	0	0	1
ENSG00000165323	FAT3	0	0	1
ENSG00000180773	SLC36A4	0	0	1
ENSG00000165895	ARHGAP42	0	0	1
ENSG00000170962	PDGFD	0	0	1
ENSG00000152402	GUCY1A2	0	0	1
ENSG00000204370	SDHD	0	0	1
ENSG00000048028	USP28	0	0	1
ENSG00000168092	PAFAH1B2	0	0	1
ENSG00000177103	DSCAML1	0	0	1
ENSG00000137726	FXYD6	0	0	1
ENSG00000172350	ABCG4	0	0	1
ENSG00000248712	CCDC153	0	0	1
ENSG00000150433	TMEM218	0	0	1
ENSG00000166106	ADAMTS15	0	0	1
ENSG00000183715	OPCML	0	0	1
ENSG00000151067	CACNA1C	0	0	1
ENSG00000004478	FKBP4	0	0	1
ENSG00000078246	TULP3	0	0	1
ENSG00000111664	GNB3	0	0	1
ENSG00000089818	NECAP1	0	0	1
ENSG00000166532	RIMKLB	0	0	1
ENSG00000111266	DUSP16	0	0	1
ENSG00000013588	GPRC5A	0	0	1
ENSG00000121316	PLBD1	0	0	1
ENSG00000052126	PLEKHA5	0	0	1
ENSG00000121350	PYROXD1	0	0	1
ENSG00000004700	RECQL	0	0	1
ENSG00000139132	FGD4	0	0	1
ENSG00000139117	CPNE8	0	0	1
ENSG00000123352	SPATS2	0	0	1
ENSG00000196876	SCN8A	0	0	1
ENSG00000063046	EIF4B	0	0	1
ENSG00000123411	IKZF4	0	0	1
ENSG00000139645	ANKRD52	0	0	1
ENSG00000076108	BAZ2A	0	0	1
ENSG00000166886	NAB2	0	0	1
ENSG00000166987	MBD6	0	0	1
ENSG00000139266	MARCHF9	0	0	1
ENSG00000174099	MSRB3	0	0	1
ENSG00000149948	HMGA2	0	0	1
ENSG00000155974	GRIP1	0	0	1
ENSG00000135678	CPM	0	0	1
ENSG00000111605	CPSF6	0	0	1
ENSG00000127337	YEATS4	0	0	1
ENSG00000139278	GLIPR1	0	0	1
ENSG00000177425	PAWR	0	0	1
ENSG00000072041	SLC6A15	0	0	1
ENSG00000120802	TMPO	0	0	1
ENSG00000111666	CHPT1	0	0	1
ENSG00000111670	GNPTAB	0	0	1
ENSG00000111727	HCFC2	0	0	1
ENSG00000136044	APPL2	0	0	1
ENSG00000139437	TCHP	0	0	1
ENSG00000174437	ATP2A2	0	0	1
ENSG00000111300	NAA25	0	0	1
ENSG00000135111	TBX3	0	0	1
ENSG00000135119	RNFT2	0	0	1
ENSG00000111725	PRKAB1	0	0	1
ENSG00000110931	CAMKK2	0	0	1
ENSG00000179195	ZNF664	0	0	1
ENSG00000081760	AACS	0	0	1
ENSG00000139364	TMEM132B	0	0	1
ENSG00000090615	GOLGA3	0	0	1
ENSG00000121741	ZMYM2	0	0	1
ENSG00000150457	LATS2	0	0	1
ENSG00000102678	FGF9	0	0	1
ENSG00000102683	SGCG	0	0	1
ENSG00000139508	SLC46A3	0	0	1
ENSG00000132938	MTUS2	0	0	1
ENSG00000073910	FRY	0	0	1
ENSG00000133119	RFC3	0	0	1
ENSG00000172915	NBEA	0	0	1
ENSG00000133083	DCLK1	0	0	1
ENSG00000120699	EXOSC8	0	0	1
ENSG00000133110	POSTN	0	0	1
ENSG00000133107	TRPC4	0	0	1
ENSG00000150893	FREM2	0	0	1
ENSG00000204977	TRIM13	0	0	1
ENSG00000139734	DIAPH3	0	0	1
ENSG00000118922	KLF12	0	0	1
ENSG00000118939	UCHL3	0	0	1
ENSG00000136155	SCEL	0	0	1
ENSG00000139737	SLAIN1	0	0	1
ENSG00000152749	GPR180	0	0	1
ENSG00000125285	SOX21	0	0	1
ENSG00000139793	MBNL2	0	0	1
ENSG00000125247	TMTC4	0	0	1
ENSG00000139826	ABHD13	0	0	1
ENSG00000185950	IRS2	0	0	1
ENSG00000139842	CUL4A	0	0	1
ENSG00000092094	OSGEP	0	0	1
ENSG00000129474	AJUBA	0	0	1
ENSG00000100445	SDR39U1	0	0	1
ENSG00000100852	ARHGAP5	0	0	1
ENSG00000165410	CFL2	0	0	1
ENSG00000198604	BAZ1A	0	0	1
ENSG00000100934	SEC23A	0	0	1
ENSG00000187790	FANCM	0	0	1
ENSG00000165527	ARF6	0	0	1
ENSG00000100503	NIN	0	0	1
ENSG00000180998	GPR137C	0	0	1
ENSG00000100526	CDKN3	0	0	1
ENSG00000168175	MAPK1IP1L	0	0	1
ENSG00000023608	SNAPC1	0	0	1
ENSG00000198133	TMEM229B	0	0	1
ENSG00000081181	ARG2	0	0	1
ENSG00000182732	RGS6	0	0	1
ENSG00000205683	DPF3	0	0	1
ENSG00000100767	PAPLN	0	0	1
ENSG00000119661	DNAL1	0	0	1
ENSG00000140044	JDP2	0	0	1
ENSG00000100593	ISM2	0	0	1
ENSG00000185070	FLRT2	0	0	1
ENSG00000100604	CHGA	0	0	1
ENSG00000133958	UNC79	0	0	1
ENSG00000196136	SERPINA3	0	0	1
ENSG00000206190	ATP10A	0	0	1
ENSG00000198826	ARHGAP11A	0	0	1
ENSG00000198146	ZNF770	0	0	1
ENSG00000092470	WDR76	0	0	1
ENSG00000166200	COPS2	0	0	1
ENSG00000128833	MYO5C	0	0	1
ENSG00000171016	PYGO1	0	0	1
ENSG00000181827	RFX7	0	0	1
ENSG00000140262	TCF12	0	0	1
ENSG00000140299	BNIP2	0	0	1
ENSG00000241839	PLEKHO2	0	0	1
ENSG00000074603	DPP8	0	0	1
ENSG00000137868	STRA6	0	0	1
ENSG00000178802	MPI	0	0	1
ENSG00000058335	RASGRF1	0	0	1
ENSG00000064726	BTBD1	0	0	1
ENSG00000140526	ABHD2	0	0	1
ENSG00000140522	RLBP1	0	0	1
ENSG00000196557	CACNA1H	0	0	1
ENSG00000065054	SLC9A3R2	0	0	1
ENSG00000103174	NAGPA	0	0	1
ENSG00000213853	EMP2	0	0	1
ENSG00000182108	DEXI	0	0	1
ENSG00000038532	CLEC16A	0	0	1
ENSG00000184602	SNN	0	0	1
ENSG00000170537	TMC7	0	0	1
ENSG00000167186	COQ7	0	0	1
ENSG00000197006	METTL9	0	0	1
ENSG00000174938	SEZ6L2	0	0	1
ENSG00000099365	STX1B	0	0	1
ENSG00000167397	VKORC1	0	0	1
ENSG00000103460	TOX3	0	0	1
ENSG00000177200	CHD9	0	0	1
ENSG00000125124	BBS2	0	0	1
ENSG00000187193	MT1X	0	0	1
ENSG00000088682	COQ9	0	0	1
ENSG00000102978	POLR2C	0	0	1
ENSG00000159714	ZDHHC1	0	0	1
ENSG00000178573	MAF	0	0	1
ENSG00000261609	GAN	0	0	1
ENSG00000131153	GINS2	0	0	1
ENSG00000179409	GEMIN4	0	0	1
ENSG00000167703	SLC43A2	0	0	1
ENSG00000074755	ZZEF1	0	0	1
ENSG00000161920	MED11	0	0	1
ENSG00000129235	TXNDC17	0	0	1
ENSG00000161958	FGF11	0	0	1
ENSG00000183011	NAA38	0	0	1
ENSG00000170049	KCNAB3	0	0	1
ENSG00000178921	PFAS	0	0	1
ENSG00000125430	HS3ST3B1	0	0	1
ENSG00000142494	SLC47A1	0	0	1
ENSG00000108599	AKAP10	0	0	1
ENSG00000109083	IFT20	0	0	1
ENSG00000109079	TNFAIP1	0	0	1
ENSG00000278540	ACACA	0	0	1
ENSG00000141750	STAC2	0	0	1
ENSG00000161594	KLHL10	0	0	1
ENSG00000131470	PSMC3IP	0	0	1
ENSG00000073969	NSF	0	0	1
ENSG00000189120	SP6	0	0	1
ENSG00000159184	HOXB13	0	0	1
ENSG00000159202	UBE2Z	0	0	1
ENSG00000141179	PCTP	0	0	1
ENSG00000182628	SKA2	0	0	1
ENSG00000068489	PRR11	0	0	1
ENSG00000108406	DHX40	0	0	1
ENSG00000141378	PTRH2	0	0	1
ENSG00000108506	INTS2	0	0	1
ENSG00000197170	PSMD12	0	0	1
ENSG00000141576	RNF157	0	0	1
ENSG00000182534	MXRA7	0	0	1
ENSG00000167889	MGAT5B	0	0	1
ENSG00000055483	USP36	0	0	1
ENSG00000101745	ANKRD12	0	0	1
ENSG00000141401	IMPA2	0	0	1
ENSG00000175354	PTPN2	0	0	1
ENSG00000101639	CEP192	0	0	1
ENSG00000141458	NPC1	0	0	1
ENSG00000141447	OSBPL1A	0	0	1
ENSG00000171885	AQP4	0	0	1
ENSG00000118276	B4GALT6	0	0	1
ENSG00000141424	SLC39A6	0	0	1
ENSG00000152242	C18orf25	0	0	1
ENSG00000078043	PIAS2	0	0	1
ENSG00000167216	KATNAL2	0	0	1
ENSG00000081923	ATP8B1	0	0	1
ENSG00000101542	CDH20	0	0	1
ENSG00000176641	RNF152	0	0	1
ENSG00000141664	ZCCHC2	0	0	1
ENSG00000206052	DOK6	0	0	1
ENSG00000176225	RTTN	0	0	1
ENSG00000101493	ZNF516	0	0	1
ENSG00000099822	HCN2	0	0	1
ENSG00000064666	CNN2	0	0	1
ENSG00000118046	STK11	0	0	1
ENSG00000079313	REXO1	0	0	1
ENSG00000125912	NCLN	0	0	1
ENSG00000105229	PIAS4	0	0	1
ENSG00000077463	SIRT6	0	0	1
ENSG00000104880	ARHGEF18	0	0	1
ENSG00000185236	RAB11B	0	0	1
ENSG00000196361	ELAVL3	0	0	1
ENSG00000132003	ZSWIM4	0	0	1
ENSG00000123159	GIPC1	0	0	1
ENSG00000167461	RAB8A	0	0	1
ENSG00000127528	KLF2	0	0	1
ENSG00000105711	SCN1B	0	0	1
ENSG00000105698	USF2	0	0	1
ENSG00000249115	HAUS5	0	0	1
ENSG00000075702	WDR62	0	0	1
ENSG00000011485	PPP5C	0	0	1
ENSG00000160014	CALM3	0	0	1
ENSG00000105281	SLC1A5	0	0	1
ENSG00000063176	SPHK2	0	0	1
ENSG00000105538	RASIP1	0	0	1
ENSG00000142552	RCN3	0	0	1
ENSG00000131398	KCNC3	0	0	1
ENSG00000105379	ETFB	0	0	1
ENSG00000101266	CSNK2A1	0	0	1
ENSG00000215397	SCRT2	0	0	1
ENSG00000088832	FKBP1A	0	0	1
ENSG00000125772	GPCPD1	0	0	1
ENSG00000125885	MCM8	0	0	1
ENSG00000125827	TMX4	0	0	1
ENSG00000089050	RBBP9	0	0	1
ENSG00000185052	SLC24A3	0	0	1
ENSG00000101003	GINS1	0	0	1
ENSG00000101350	KIF3B	0	0	1
ENSG00000078699	CBFA2T2	0	0	1
ENSG00000125967	NECAB3	0	0	1
ENSG00000197122	SRC	0	0	1
ENSG00000101445	PPP1R16B	0	0	1
ENSG00000198900	TOP1	0	0	1
ENSG00000149596	JPH2	0	0	1
ENSG00000197296	FITM2	0	0	1
ENSG00000124140	SLC12A5	0	0	1
ENSG00000124151	NCOA3	0	0	1
ENSG00000158470	B4GALT5	0	0	1
ENSG00000171940	ZNF217	0	0	1
ENSG00000019186	CYP24A1	0	0	1
ENSG00000087586	AURKA	0	0	1
ENSG00000101144	BMP7	0	0	1
ENSG00000101190	TCFL5	0	0	1
ENSG00000156273	BACH1	0	0	1
ENSG00000099901	RANBP1	0	0	1
ENSG00000100285	NEFH	0	0	1
ENSG00000182541	LIMK2	0	0	1
ENSG00000185666	SYN3	0	0	1
ENSG00000100196	KDELR3	0	0	1
ENSG00000100380	ST13	0	0	1
ENSG00000167074	TEF	0	0	1
ENSG00000100167	SEPTIN3	0	0	1
ENSG00000100304	TTLL12	0	0	1
ENSG00000186951	PPARA	0	0	1
ENSG00000075240	GRAMD4	0	0	1
ENSG00000100422	CERK	0	0	1
ENSG00000219438	TAFA5	0	0	1
ENSG00000100425	BRD1	0	0	1
ENSG00000182858	ALG12	0	0	1
ENSG00000100427	MLC1	0	0	1
ENSG00000073150	PANX2	0	0	1
ENSG00000146950	SHROOM2	0	0	1
ENSG00000047230	CTPS2	0	0	1
ENSG00000169891	REPS2	0	0	1
ENSG00000012174	MBTPS2	0	0	1
ENSG00000174010	KLHL15	0	0	1
ENSG00000130741	EIF2S3	0	0	1
ENSG00000169306	IL1RAPL1	0	0	1
ENSG00000198814	GK	0	0	1
ENSG00000165169	DYNLT3	0	0	1
ENSG00000183337	BCOR	0	0	1
ENSG00000183690	EFHC2	0	0	1
ENSG00000069509	FUNDC1	0	0	1
ENSG00000102317	RBM3	0	0	1
ENSG00000102057	KCND1	0	0	1
ENSG00000072501	SMC1A	0	0	1
ENSG00000165259	HDX	0	0	1
ENSG00000188419	CHM	0	0	1
ENSG00000188917	TRMT2B	0	0	1
ENSG00000158427	TMSB15B	0	0	1
ENSG00000269226	TMSB15B	0	0	1
ENSG00000089682	RBM41	0	0	1
ENSG00000080561	MID2	0	0	1
ENSG00000077264	PAK3	0	0	1
ENSG00000175556	LONRF3	0	0	1
ENSG00000005022	SLC25A5	0	0	1
ENSG00000123728	RAP2C	0	0	1
ENSG00000160131	VMA21	0	0	1
ENSG00000221867	MAGEA3	0	0	1
ENSG00000130821	SLC6A8	0	0	1
ENSG00000130830	MPP1	0	0	1
ENSG00000198712	MT-CO2	0	0	1
ENSG00000276996	None	0	0	1
ENSG00000188157	AGRN	1	1	0
ENSG00000142599	RERE	1	1	0
ENSG00000011021	CLCN6	1	1	0
ENSG00000169991	IFFO2	1	1	0
ENSG00000117298	ECE1	1	1	0
ENSG00000004455	AK2	1	1	0
ENSG00000126070	AGO3	1	1	0
ENSG00000162367	TAL1	1	1	0
ENSG00000162599	NFIA	1	1	0
ENSG00000162433	AK4	1	1	0
ENSG00000162613	FUBP1	1	1	0
ENSG00000117519	CNN3	1	1	0
ENSG00000117569	PTBP2	1	1	0
ENSG00000162695	SLC30A7	1	1	0
ENSG00000155380	SLC16A1	1	1	0
ENSG00000173218	VANGL1	1	1	0
ENSG00000143603	KCNN3	1	1	0
ENSG00000162738	VANGL2	1	1	0
ENSG00000143195	ILDR2	1	1	0
ENSG00000143190	POU2F1	1	1	0
ENSG00000094975	SUCO	1	1	0
ENSG00000143322	ABL2	1	1	0
ENSG00000116667	C1orf21	1	1	0
ENSG00000116833	NR5A2	1	1	0
ENSG00000159388	BTG2	1	1	0
ENSG00000117266	CDK18	1	1	0
ENSG00000168118	RAB4A	1	1	0
ENSG00000183780	SLC35F3	1	1	0
ENSG00000151692	RNF144A	1	1	0
ENSG00000198399	ITSN2	1	1	0
ENSG00000157851	DPYSL5	1	1	0
ENSG00000075426	FOSL2	1	1	0
ENSG00000013016	EHD3	1	1	0
ENSG00000115904	SOS1	1	1	0
ENSG00000171150	SOCS5	1	1	0
ENSG00000115355	CCDC88A	1	1	0
ENSG00000179833	SERTAD2	1	1	0
ENSG00000115107	STEAP3	1	1	0
ENSG00000169967	MAP3K2	1	1	0
ENSG00000144233	AMMECR1L	1	1	0
ENSG00000144228	SPOPL	1	1	0
ENSG00000123636	BAZ2B	1	1	0
ENSG00000182263	FIGN	1	1	0
ENSG00000198648	STK39	1	1	0
ENSG00000197121	PGAP1	1	1	0
ENSG00000118257	NRP2	1	1	0
ENSG00000114933	INO80D	1	1	0
ENSG00000118260	CREB1	1	1	0
ENSG00000030419	IKZF2	1	1	0
ENSG00000068024	HDAC4	1	1	0
ENSG00000142327	RNPEPL1	1	1	0
ENSG00000132182	NUP210	1	1	0
ENSG00000144645	OSBPL10	1	1	0
ENSG00000114745	GORASP1	1	1	0
ENSG00000163602	RYBP	1	1	0
ENSG00000163389	POGLUT1	1	1	0
ENSG00000082701	GSK3B	1	1	0
ENSG00000114126	TFDP2	1	1	0
ENSG00000144893	MED12L	1	1	0
ENSG00000121871	SLITRK3	1	1	0
ENSG00000013293	SLC7A14	1	1	0
ENSG00000121879	PIK3CA	1	1	0
ENSG00000152492	CCDC50	1	1	0
ENSG00000163288	GABRB1	1	1	0
ENSG00000173542	MOB1B	1	1	0
ENSG00000152785	BMP3	1	1	0
ENSG00000185477	GPRIN3	1	1	0
ENSG00000120519	SLC10A7	1	1	0
ENSG00000109756	RAPGEF2	1	1	0
ENSG00000154447	SH3RF1	1	1	0
ENSG00000173320	STOX2	1	1	0
ENSG00000178996	SNX18	1	1	0
ENSG00000153914	SREK1	1	1	0
ENSG00000038427	VCAN	1	1	0
ENSG00000176018	LYSMD3	1	1	0
ENSG00000118985	ELL2	1	1	0
ENSG00000113532	ST8SIA4	1	1	0
ENSG00000092421	SEMA6A	1	1	0
ENSG00000168916	ZNF608	1	1	0
ENSG00000131437	KIF3A	1	1	0
ENSG00000072364	AFF4	1	1	0
ENSG00000113658	SMAD5	1	1	0
ENSG00000132563	REEP2	1	1	0
ENSG00000156453	PCDH1	1	1	0
ENSG00000183111	ARHGEF37	1	1	0
ENSG00000135074	ADAM19	1	1	0
ENSG00000164463	CREBRF	1	1	0
ENSG00000197226	TBC1D9B	1	1	0
ENSG00000131459	GFPT2	1	1	0
ENSG00000164379	FOXQ1	1	1	0
ENSG00000112242	E2F3	1	1	0
ENSG00000112062	MAPK14	1	1	0
ENSG00000112561	TFEB	1	1	0
ENSG00000164663	USP49	1	1	0
ENSG00000151914	DST	1	1	0
ENSG00000187772	LIN28B	1	1	0
ENSG00000112319	EYA4	1	1	0
ENSG00000118496	FBXO30	1	1	0
ENSG00000111961	SASH1	1	1	0
ENSG00000105926	MPP6	1	1	0
ENSG00000106004	HOXA5	1	1	0
ENSG00000106609	TMEM248	1	1	0
ENSG00000127946	HIP1	1	1	0
ENSG00000234545	FAM133B	1	1	0
ENSG00000161048	NAPEPLD	1	1	0
ENSG00000064393	HIPK2	1	1	0
ENSG00000261115	TMEM178B	1	1	0
ENSG00000164778	EN2	1	1	0
ENSG00000154359	LONRF1	1	1	0
ENSG00000156675	RAB11FIP1	1	1	0
ENSG00000147526	TACC1	1	1	0
ENSG00000181690	PLAG1	1	1	0
ENSG00000104313	EYA1	1	1	0
ENSG00000104343	UBE2W	1	1	0
ENSG00000177570	SAMD12	1	1	0
ENSG00000080298	RFX3	1	1	0
ENSG00000099219	ERMP1	1	1	0
ENSG00000106799	TGFBR1	1	1	0
ENSG00000165029	ABCA1	1	1	0
ENSG00000243444	None	1	1	0
ENSG00000157657	ZNF618	1	1	0
ENSG00000182752	PAPPA	1	1	0
ENSG00000107021	TBC1D13	1	1	0
ENSG00000148248	SURF4	1	1	0
ENSG00000186350	RXRA	1	1	0
ENSG00000151474	FRMD4A	1	1	0
ENSG00000078114	NEBL	1	1	0
ENSG00000198964	SGMS1	1	1	0
ENSG00000151151	IPMK	1	1	0
ENSG00000108091	CCDC6	1	1	0
ENSG00000096717	SIRT1	1	1	0
ENSG00000138336	TET1	1	1	0
ENSG00000108179	PPIF	1	1	0
ENSG00000165424	ZCCHC24	1	1	0
ENSG00000198682	PAPSS2	1	1	0
ENSG00000152782	PANK1	1	1	0
ENSG00000187122	SLIT1	1	1	0
ENSG00000269891	ARHGAP19-SLIT1	1	1	0
ENSG00000099194	SCD	1	1	0
ENSG00000107957	SH3PXD2A	1	1	0
ENSG00000108001	EBF3	1	1	0
ENSG00000166402	TUB	1	1	0
ENSG00000011405	PIK3C2A	1	1	0
ENSG00000166833	NAV2	1	1	0
ENSG00000110422	HIPK3	1	1	0
ENSG00000110042	DTX4	1	1	0
ENSG00000162231	NXF1	1	1	0
ENSG00000184743	ATL3	1	1	0
ENSG00000173465	ZNRD2	1	1	0
ENSG00000165434	PGM2L1	1	1	0
ENSG00000149308	NPAT	1	1	0
ENSG00000086848	ALG9	1	1	0
ENSG00000182985	CADM1	1	1	0
ENSG00000186318	BACE1	1	1	0
ENSG00000110367	DDX6	1	1	0
ENSG00000184232	OAF	1	1	0
ENSG00000060237	WNK1	1	1	0
ENSG00000151079	KCNA6	1	1	0
ENSG00000111262	KCNA1	1	1	0
ENSG00000166860	ZBTB39	1	1	0
ENSG00000135677	GNS	1	1	0
ENSG00000135643	KCNMB4	1	1	0
ENSG00000173451	THAP2	1	1	0
ENSG00000067798	NAV3	1	1	0
ENSG00000136010	ALDH1L2	1	1	0
ENSG00000084112	SSH1	1	1	0
ENSG00000139433	GLTP	1	1	0
ENSG00000112787	FBRSL1	1	1	0
ENSG00000102753	KPNA3	1	1	0
ENSG00000136158	SPRY2	1	1	0
ENSG00000102466	FGF14	1	1	0
ENSG00000184304	PRKD1	1	1	0
ENSG00000151327	FAM177A1	1	1	0
ENSG00000126821	SGPP1	1	1	0
ENSG00000054690	PLEKHH1	1	1	0
ENSG00000185650	ZFP36L1	1	1	0
ENSG00000080815	PSEN1	1	1	0
ENSG00000100433	KCNK10	1	1	0
ENSG00000140320	BAHD1	1	1	0
ENSG00000128917	DLL4	1	1	0
ENSG00000137872	SEMA6D	1	1	0
ENSG00000069974	RAB27A	1	1	0
ENSG00000169410	PTPN9	1	1	0
ENSG00000173517	PEAK1	1	1	0
ENSG00000103126	AXIN1	1	1	0
ENSG00000103365	GGA2	1	1	0
ENSG00000102921	N4BP1	1	1	0
ENSG00000125107	CNOT1	1	1	0
ENSG00000067955	CBFB	1	1	0
ENSG00000103056	SMPD3	1	1	0
ENSG00000102908	NFAT5	1	1	0
ENSG00000171724	VAT1L	1	1	0
ENSG00000166446	CDYL2	1	1	0
ENSG00000185722	ANKFY1	1	1	0
ENSG00000129245	FXR2	1	1	0
ENSG00000173065	FAM222B	1	1	0
ENSG00000160551	TAOK1	1	1	0
ENSG00000108349	CASC3	1	1	0
ENSG00000171475	WIPF2	1	1	0
ENSG00000167182	SP2	1	1	0
ENSG00000198740	ZNF652	1	1	0
ENSG00000136504	KAT7	1	1	0
ENSG00000153933	DGKE	1	1	0
ENSG00000108443	RPS6KB1	1	1	0
ENSG00000170921	TANC2	1	1	0
ENSG00000136485	DCAF7	1	1	0
ENSG00000109089	CDR2L	1	1	0
ENSG00000177885	GRB2	1	1	0
ENSG00000141448	GATA6	1	1	0
ENSG00000101746	NOL4	1	1	0
ENSG00000134769	DTNA	1	1	0
ENSG00000119547	ONECUT2	1	1	0
ENSG00000119541	VPS4B	1	1	0
ENSG00000180011	ZADH2	1	1	0
ENSG00000205922	ONECUT3	1	1	0
ENSG00000178904	DPY19L3	1	1	0
ENSG00000126458	RRAS	1	1	0
ENSG00000179922	ZNF784	1	1	0
ENSG00000088854	C20orf194	1	1	0
ENSG00000125848	FLRT3	1	1	0
ENSG00000173404	INSM1	1	1	0
ENSG00000126003	PLAGL2	1	1	0
ENSG00000101115	SALL4	1	1	0
ENSG00000101150	TPD52L2	1	1	0
ENSG00000198743	SLC5A3	1	1	0
ENSG00000157542	KCNJ6	1	1	0
ENSG00000100030	MAPK1	1	1	0
ENSG00000100302	RASD2	1	1	0
ENSG00000170638	TRABD	1	1	0
ENSG00000147036	LANCL3	1	1	0
ENSG00000196632	WNK3	1	1	0
ENSG00000204116	CHIC1	1	1	0
ENSG00000131263	RLIM	1	1	0
ENSG00000179083	FAM133A	1	1	0
ENSG00000156531	PHF6	1	1	0
ENSG00000168939	SPRY3	1	1	0
ENSG00000019549	SNAI2	1	1	0
ENSG00000162493	PDPN	0	1	0
ENSG00000055070	SZRD1	0	1	0
ENSG00000159423	ALDH4A1	0	1	0
ENSG00000133216	EPHB2	0	1	0
ENSG00000117318	ID3	0	1	0
ENSG00000057757	PITHD1	0	1	0
ENSG00000189266	PNRC2	0	1	0
ENSG00000131914	LIN28A	0	1	0
ENSG00000142784	WDTC1	0	1	0
ENSG00000159023	EPB41	0	1	0
ENSG00000025800	KPNA6	0	1	0
ENSG00000160050	CCDC28B	0	1	0
ENSG00000116544	DLGAP3	0	1	0
ENSG00000146463	ZMYM4	0	1	0
ENSG00000185090	MANEAL	0	1	0
ENSG00000174574	AKIRIN1	0	1	0
ENSG00000116981	NT5C1A	0	1	0
ENSG00000085831	TTC39A	0	1	0
ENSG00000162390	ACOT11	0	1	0
ENSG00000185483	ROR1	0	1	0
ENSG00000172380	GNG12	0	1	0
ENSG00000050628	PTGER3	0	1	0
ENSG00000184005	ST6GALNAC3	0	1	0
ENSG00000162642	C1orf52	0	1	0
ENSG00000153904	DDAH1	0	1	0
ENSG00000069702	TGFBR3	0	1	0
ENSG00000117525	F3	0	1	0
ENSG00000134215	VAV3	0	1	0
ENSG00000174151	CYB561D1	0	1	0
ENSG00000184371	CSF1	0	1	0
ENSG00000171385	KCND3	0	1	0
ENSG00000116489	CAPZA1	0	1	0
ENSG00000081026	MAGI3	0	1	0
ENSG00000143061	IGSF3	0	1	0
ENSG00000265972	TXNIP	0	1	0
ENSG00000169291	SHE	0	1	0
ENSG00000260238	PMF1-BGLAP	0	1	0
ENSG00000132694	ARHGEF11	0	1	0
ENSG00000117143	UAP1	0	1	0
ENSG00000000457	SCYL3	0	1	0
ENSG00000116161	CACYBP	0	1	0
ENSG00000143324	XPR1	0	1	0
ENSG00000198756	COLGALT2	0	1	0
ENSG00000116406	EDEM3	0	1	0
ENSG00000135842	NIBAN1	0	1	0
ENSG00000143858	SYT2	0	1	0
ENSG00000198625	MDM4	0	1	0
ENSG00000184144	CNTN2	0	1	0
ENSG00000162873	KLHDC8A	0	1	0
ENSG00000266028	SRGAP2	0	1	0
ENSG00000117625	RCOR3	0	1	0
ENSG00000136630	HLX	0	1	0
ENSG00000154342	WNT3A	0	1	0
ENSG00000132031	MATN3	0	1	0
ENSG00000138031	ADCY3	0	1	0
ENSG00000115226	FNDC4	0	1	0
ENSG00000152527	PLEKHH2	0	1	0
ENSG00000184261	KCNK12	0	1	0
ENSG00000119737	GPR75	0	1	0
ENSG00000115306	SPTBN1	0	1	0
ENSG00000075340	ADD2	0	1	0
ENSG00000124374	PAIP2B	0	1	0
ENSG00000075292	ZNF638	0	1	0
ENSG00000034510	TMSB10	0	1	0
ENSG00000176407	KCMF1	0	1	0
ENSG00000152291	TGOLN2	0	1	0
ENSG00000115548	KDM3A	0	1	0
ENSG00000144218	AFF3	0	1	0
ENSG00000198914	POU3F3	0	1	0
ENSG00000196862	RGPD4	0	1	0
ENSG00000135968	GCC2	0	1	0
ENSG00000135960	EDAR	0	1	0
ENSG00000183054	RGPD6	0	1	0
ENSG00000163064	EN1	0	1	0
ENSG00000082258	CCNT2	0	1	0
ENSG00000121989	ACVR2A	0	1	0
ENSG00000204406	MBD5	0	1	0
ENSG00000115963	RND3	0	1	0
ENSG00000162989	KCNJ3	0	1	0
ENSG00000136542	GALNT5	0	1	0
ENSG00000123612	ACVR1C	0	1	0
ENSG00000115339	GALNT3	0	1	0
ENSG00000144285	SCN1A	0	1	0
ENSG00000138398	PPIG	0	1	0
ENSG00000128683	GAD1	0	1	0
ENSG00000152256	PDK1	0	1	0
ENSG00000116044	NFE2L2	0	1	0
ENSG00000170035	UBE2E3	0	1	0
ENSG00000168542	COL3A1	0	1	0
ENSG00000115415	STAT1	0	1	0
ENSG00000173559	NABP1	0	1	0
ENSG00000196950	SLC39A10	0	1	0
ENSG00000144381	HSPD1	0	1	0
ENSG00000082153	BZW1	0	1	0
ENSG00000064012	CASP8	0	1	0
ENSG00000204217	BMPR2	0	1	0
ENSG00000144401	METTL21A	0	1	0
ENSG00000144406	UNC80	0	1	0
ENSG00000174453	VWC2L	0	1	0
ENSG00000144452	ABCA12	0	1	0
ENSG00000169047	IRS1	0	1	0
ENSG00000173744	AGFG1	0	1	0
ENSG00000156966	B3GNT7	0	1	0
ENSG00000124831	LRRFIP1	0	1	0
ENSG00000132326	PER2	0	1	0
ENSG00000168395	ING5	0	1	0
ENSG00000132170	PPARG	0	1	0
ENSG00000163520	FBLN2	0	1	0
ENSG00000131375	CAPN7	0	1	0
ENSG00000206561	COLQ	0	1	0
ENSG00000154822	PLCL2	0	1	0
ENSG00000151789	ZNF385D	0	1	0
ENSG00000182247	UBE2E2	0	1	0
ENSG00000174738	NR1D2	0	1	0
ENSG00000151092	NGLY1	0	1	0
ENSG00000163513	TGFBR2	0	1	0
ENSG00000172995	ARPP21	0	1	0
ENSG00000144655	CSRNP1	0	1	0
ENSG00000114648	KLHL18	0	1	0
ENSG00000177352	CCDC71	0	1	0
ENSG00000114738	MAPKAPK3	0	1	0
ENSG00000259956	RBM15B	0	1	0
ENSG00000163935	SFMBT1	0	1	0
ENSG00000157445	CACNA2D3	0	1	0
ENSG00000187672	ERC2	0	1	0
ENSG00000163376	KBTBD8	0	1	0
ENSG00000169855	ROBO1	0	1	0
ENSG00000206538	VGLL3	0	1	0
ENSG00000121579	NAA50	0	1	0
ENSG00000185565	LSAMP	0	1	0
ENSG00000065485	PDIA5	0	1	0
ENSG00000121542	SEC22A	0	1	0
ENSG00000058262	SEC61A1	0	1	0
ENSG00000179348	GATA2	0	1	0
ENSG00000163902	RPN1	0	1	0
ENSG00000004399	PLXND1	0	1	0
ENSG00000172765	TMCC1	0	1	0
ENSG00000138246	DNAJC13	0	1	0
ENSG00000118007	STAG1	0	1	0
ENSG00000114098	ARMC8	0	1	0
ENSG00000158258	CLSTN2	0	1	0
ENSG00000155903	RASA2	0	1	0
ENSG00000196549	MME	0	1	0
ENSG00000163655	GMPS	0	1	0
ENSG00000058063	ATP11B	0	1	0
ENSG00000198836	OPA1	0	1	0
ENSG00000163960	UBXN7	0	1	0
ENSG00000185619	PCGF3	0	1	0
ENSG00000152953	STK32B	0	1	0
ENSG00000170871	KIAA0232	0	1	0
ENSG00000196526	AFAP1	0	1	0
ENSG00000109705	NKX3-2	0	1	0
ENSG00000145147	SLIT2	0	1	0
ENSG00000109819	PPARGC1A	0	1	0
ENSG00000181982	CCDC149	0	1	0
ENSG00000109689	STIM2	0	1	0
ENSG00000109787	KLF3	0	1	0
ENSG00000163683	SMIM14	0	1	0
ENSG00000188848	BEND4	0	1	0
ENSG00000124406	ATP8A1	0	1	0
ENSG00000075539	FRYL	0	1	0
ENSG00000109184	DCUN1D4	0	1	0
ENSG00000174799	CEP135	0	1	0
ENSG00000174780	SRP72	0	1	0
ENSG00000018189	RUFY3	0	1	0
ENSG00000138670	RASGEF1B	0	1	0
ENSG00000163624	CDS1	0	1	0
ENSG00000138640	FAM13A	0	1	0
ENSG00000155011	DKK2	0	1	0
ENSG00000145362	ANK2	0	1	0
ENSG00000174607	UGT8	0	1	0
ENSG00000138688	KIAA1109	0	1	0
ENSG00000151012	SLC7A11	0	1	0
ENSG00000172007	RAB33B	0	1	0
ENSG00000109458	GAB1	0	1	0
ENSG00000151612	ZNF827	0	1	0
ENSG00000109572	CLCN3	0	1	0
ENSG00000109586	GALNT7	0	1	0
ENSG00000164107	HAND2	0	1	0
ENSG00000150630	VEGFC	0	1	0
ENSG00000153395	LPCAT1	0	1	0
ENSG00000113360	DROSHA	0	1	0
ENSG00000039560	RAI14	0	1	0
ENSG00000112964	GHR	0	1	0
ENSG00000016082	ISL1	0	1	0
ENSG00000164171	ITGA2	0	1	0
ENSG00000164258	NDUFS4	0	1	0
ENSG00000035499	DEPDC1B	0	1	0
ENSG00000123213	NLN	0	1	0
ENSG00000145675	PIK3R1	0	1	0
ENSG00000083312	TNPO1	0	1	0
ENSG00000113231	PDE8B	0	1	0
ENSG00000174695	TMEM167A	0	1	0
ENSG00000145681	HAPLN1	0	1	0
ENSG00000176055	MBLAC2	0	1	0
ENSG00000129595	EPB41L4A	0	1	0
ENSG00000172795	DCP2	0	1	0
ENSG00000113083	LOX	0	1	0
ENSG00000131435	PDLIM4	0	1	0
ENSG00000198944	SOWAHA	0	1	0
ENSG00000113615	SEC24A	0	1	0
ENSG00000113648	MACROH2A1	0	1	0
ENSG00000120709	FAM53C	0	1	0
ENSG00000120727	PAIP2	0	1	0
ENSG00000113070	HBEGF	0	1	0
ENSG00000183775	KCTD16	0	1	0
ENSG00000186314	PRELID2	0	1	0
ENSG00000172548	NIPAL4	0	1	0
ENSG00000118322	ATP10B	0	1	0
ENSG00000113328	CCNG1	0	1	0
ENSG00000113742	CPEB4	0	1	0
ENSG00000165671	NSD1	0	1	0
ENSG00000146067	FAM193B	0	1	0
ENSG00000161013	MGAT4B	0	1	0
ENSG00000113300	CNOT6	0	1	0
ENSG00000131446	MGAT1	0	1	0
ENSG00000188428	BLOC1S5	0	1	0
ENSG00000111846	GCNT2	0	1	0
ENSG00000180537	RNF182	0	1	0
ENSG00000204248	COL11A2	0	1	0
ENSG00000237441	RGL2	0	1	0
ENSG00000030110	BAK1	0	1	0
ENSG00000096070	BRPF3	0	1	0
ENSG00000065491	TBC1D22B	0	1	0
ENSG00000112139	MDGA1	0	1	0
ENSG00000137166	FOXP4	0	1	0
ENSG00000112559	MDFI	0	1	0
ENSG00000124496	TRERF1	0	1	0
ENSG00000181577	C6orf223	0	1	0
ENSG00000178233	TMEM151B	0	1	0
ENSG00000146233	CYP39A1	0	1	0
ENSG00000244694	PTCHD4	0	1	0
ENSG00000124743	KLHL31	0	1	0
ENSG00000124749	COL21A1	0	1	0
ENSG00000112305	SMAP1	0	1	0
ENSG00000198478	SH3BGRL2	0	1	0
ENSG00000118402	ELOVL4	0	1	0
ENSG00000118432	CNR1	0	1	0
ENSG00000111880	RNGTT	0	1	0
ENSG00000112159	MDN1	0	1	0
ENSG00000146267	FAXC	0	1	0
ENSG00000132424	PNISR	0	1	0
ENSG00000123505	AMD1	0	1	0
ENSG00000112394	SLC16A10	0	1	0
ENSG00000196911	KPNA5	0	1	0
ENSG00000153989	NUS1	0	1	0
ENSG00000196376	SLC35F1	0	1	0
ENSG00000111879	FAM184A	0	1	0
ENSG00000135549	PKIB	0	1	0
ENSG00000111912	NCOA7	0	1	0
ENSG00000146374	RSPO3	0	1	0
ENSG00000118518	RNF146	0	1	0
ENSG00000171408	PDE7B	0	1	0
ENSG00000135597	REPS1	0	1	0
ENSG00000164442	CITED2	0	1	0
ENSG00000118495	PLAGL1	0	1	0
ENSG00000111962	UST	0	1	0
ENSG00000091844	RGS17	0	1	0
ENSG00000049618	ARID1B	0	1	0
ENSG00000085511	MAP3K4	0	1	0
ENSG00000182095	TNRC18	0	1	0
ENSG00000106346	USP42	0	1	0
ENSG00000146530	VWDE	0	1	0
ENSG00000122591	FAM126A	0	1	0
ENSG00000253293	HOXA10	0	1	0
ENSG00000106031	HOXA13	0	1	0
ENSG00000106080	FKBP14	0	1	0
ENSG00000164600	NEUROD6	0	1	0
ENSG00000122547	EEPD1	0	1	0
ENSG00000155849	ELMO1	0	1	0
ENSG00000106608	URGCP	0	1	0
ENSG00000136280	CCM2	0	1	0
ENSG00000185811	IKZF1	0	1	0
ENSG00000106683	LIMK1	0	1	0
ENSG00000272391	POM121C	0	1	0
ENSG00000187257	RSBN1L	0	1	0
ENSG00000019991	HGF	0	1	0
ENSG00000242265	PEG10	0	1	0
ENSG00000106236	NPTX2	0	1	0
ENSG00000146834	MEPCE	0	1	0
ENSG00000106351	AGFG2	0	1	0
ENSG00000106330	MOSPD3	0	1	0
ENSG00000189056	RELN	0	1	0
ENSG00000164815	ORC5	0	1	0
ENSG00000135250	SRPK2	0	1	0
ENSG00000128573	FOXP2	0	1	0
ENSG00000234224	TMEM229A	0	1	0
ENSG00000048405	ZNF800	0	1	0
ENSG00000179562	GCC1	0	1	0
ENSG00000174697	LEP	0	1	0
ENSG00000181072	CHRM2	0	1	0
ENSG00000157680	DGKI	0	1	0
ENSG00000122778	KIAA1549	0	1	0
ENSG00000055609	KMT2C	0	1	0
ENSG00000164690	SHH	0	1	0
ENSG00000176595	KBTBD11	0	1	0
ENSG00000147324	MFHAS1	0	1	0
ENSG00000171056	SOX7	0	1	0
ENSG00000155970	MICU3	0	1	0
ENSG00000198791	CNOT7	0	1	0
ENSG00000078674	PCM1	0	1	0
ENSG00000120913	PDLIM2	0	1	0
ENSG00000179388	EGR3	0	1	0
ENSG00000186918	ZNF395	0	1	0
ENSG00000104290	FZD3	0	1	0
ENSG00000104332	SFRP1	0	1	0
ENSG00000083168	KAT6A	0	1	0
ENSG00000131931	THAP1	0	1	0
ENSG00000185697	MYBL1	0	1	0
ENSG00000066777	ARFGEF1	0	1	0
ENSG00000164749	HNF4G	0	1	0
ENSG00000091656	ZFHX4	0	1	0
ENSG00000171033	PKIA	0	1	0
ENSG00000180694	TMEM64	0	1	0
ENSG00000156466	GDF6	0	1	0
ENSG00000104517	UBR5	0	1	0
ENSG00000165156	ZHX1	0	1	0
ENSG00000168672	LRATD2	0	1	0
ENSG00000153317	ASAP1	0	1	0
ENSG00000104415	CCN4	0	1	0
ENSG00000123908	AGO2	0	1	0
ENSG00000080503	SMARCA2	0	1	0
ENSG00000107105	ELAVL2	0	1	0
ENSG00000137055	PLAA	0	1	0
ENSG00000086102	NFX1	0	1	0
ENSG00000137075	RNF38	0	1	0
ENSG00000107362	ABHD17B	0	1	0
ENSG00000135052	GOLM1	0	1	0
ENSG00000023318	ERP44	0	1	0
ENSG00000251349	MSANTD3-TMEFF1	0	1	0
ENSG00000241697	TMEFF1	0	1	0
ENSG00000148143	ZNF462	0	1	0
ENSG00000196739	COL27A1	0	1	0
ENSG00000119408	NEK6	0	1	0
ENSG00000173611	SCAI	0	1	0
ENSG00000196814	MVB12B	0	1	0
ENSG00000095370	SH2D3C	0	1	0
ENSG00000167106	FAM102A	0	1	0
ENSG00000148339	SLC25A25	0	1	0
ENSG00000107130	NCS1	0	1	0
ENSG00000107164	FUBP3	0	1	0
ENSG00000165699	TSC1	0	1	0
ENSG00000198435	NRARP	0	1	0
ENSG00000198879	SFMBT2	0	1	0
ENSG00000183049	CAMK1D	0	1	0
ENSG00000204682	MIR1915HG	0	1	0
ENSG00000078403	MLLT10	0	1	0
ENSG00000269897	COMMD3-BMI1	0	1	0
ENSG00000168283	BMI1	0	1	0
ENSG00000107863	ARHGAP21	0	1	0
ENSG00000148516	ZEB1	0	1	0
ENSG00000165322	ARHGAP12	0	1	0
ENSG00000165731	RET	0	1	0
ENSG00000169813	HNRNPF	0	1	0
ENSG00000072401	UBE2D1	0	1	0
ENSG00000122870	BICC1	0	1	0
ENSG00000148572	NRBF2	0	1	0
ENSG00000171988	JMJD1C	0	1	0
ENSG00000122912	SLC25A16	0	1	0
ENSG00000108219	TSPAN14	0	1	0
ENSG00000107789	MINPP1	0	1	0
ENSG00000107796	ACTA2	0	1	0
ENSG00000198060	MARCHF5	0	1	0
ENSG00000138193	PLCE1	0	1	0
ENSG00000156398	SFXN2	0	1	0
ENSG00000166272	WBP1L	0	1	0
ENSG00000148842	CNNM2	0	1	0
ENSG00000065613	SLK	0	1	0
ENSG00000119950	MXI1	0	1	0
ENSG00000108061	SHOC2	0	1	0
ENSG00000151923	TIAL1	0	1	0
ENSG00000095574	IKZF5	0	1	0
ENSG00000174672	BRSK2	0	1	0
ENSG00000205339	IPO7	0	1	0
ENSG00000166483	WEE1	0	1	0
ENSG00000152270	PDE3B	0	1	0
ENSG00000148943	LIN7C	0	1	0
ENSG00000182255	KCNA4	0	1	0
ENSG00000066382	MPPED2	0	1	0
ENSG00000007372	PAX6	0	1	0
ENSG00000110427	KIAA1549L	0	1	0
ENSG00000135373	EHF	0	1	0
ENSG00000110435	PDHX	0	1	0
ENSG00000179241	LDLRAD3	0	1	0
ENSG00000165915	SLC39A13	0	1	0
ENSG00000134817	APLNR	0	1	0
ENSG00000110107	PRPF19	0	1	0
ENSG00000185670	ZBTB3	0	1	0
ENSG00000175591	P2RY2	0	1	0
ENSG00000214517	PPME1	0	1	0
ENSG00000150672	DLG2	0	1	0
ENSG00000152558	TMEM123	0	1	0
ENSG00000149294	NCAM1	0	1	0
ENSG00000118058	KMT2A	0	1	0
ENSG00000149582	TMEM25	0	1	0
ENSG00000137709	POU2F3	0	1	0
ENSG00000166257	SCN3B	0	1	0
ENSG00000064309	CDON	0	1	0
ENSG00000053702	NRIP2	0	1	0
ENSG00000111218	PRMT8	0	1	0
ENSG00000273079	GRIN2B	0	1	0
ENSG00000123095	BHLHE41	0	1	0
ENSG00000188375	H3-5	0	1	0
ENSG00000174718	RESF1	0	1	0
ENSG00000205592	MUC19	0	1	0
ENSG00000189079	ARID2	0	1	0
ENSG00000139209	SLC38A4	0	1	0
ENSG00000152556	PFKM	0	1	0
ENSG00000174233	ADCY6	0	1	0
ENSG00000134287	ARF3	0	1	0
ENSG00000139644	TMBIM6	0	1	0
ENSG00000161813	LARP4	0	1	0
ENSG00000183283	DAZAP2	0	1	0
ENSG00000197757	HOXC6	0	1	0
ENSG00000094916	CBX5	0	1	0
ENSG00000123307	NEUROD4	0	1	0
ENSG00000135414	GDF11	0	1	0
ENSG00000111530	CAND1	0	1	0
ENSG00000127314	RAP1B	0	1	0
ENSG00000175183	CSRP2	0	1	0
ENSG00000139220	PPFIA2	0	1	0
ENSG00000179104	TMTC2	0	1	0
ENSG00000049130	KITLG	0	1	0
ENSG00000177889	UBE2N	0	1	0
ENSG00000136040	PLXNC1	0	1	0
ENSG00000180263	FGD6	0	1	0
ENSG00000017427	IGF1	0	1	0
ENSG00000136011	STAB2	0	1	0
ENSG00000136026	CKAP4	0	1	0
ENSG00000110880	CORO1C	0	1	0
ENSG00000139445	FOXN4	0	1	0
ENSG00000139438	FAM222A	0	1	0
ENSG00000186298	PPP1CC	0	1	0
ENSG00000123066	MED13L	0	1	0
ENSG00000135108	FBXO21	0	1	0
ENSG00000111786	SRSF9	0	1	0
ENSG00000157782	CABP1	0	1	0
ENSG00000150967	ABCB9	0	1	0
ENSG00000139697	SBNO1	0	1	0
ENSG00000119242	CCDC92	0	1	0
ENSG00000177169	ULK1	0	1	0
ENSG00000121743	GJA3	0	1	0
ENSG00000165566	AMER2	0	1	0
ENSG00000083642	PDS5B	0	1	0
ENSG00000120693	SMAD9	0	1	0
ENSG00000139668	WDFY2	0	1	0
ENSG00000184226	PCDH9	0	1	0
ENSG00000136111	TBC1D4	0	1	0
ENSG00000204442	FAM155A	0	1	0
ENSG00000139832	RAB20	0	1	0
ENSG00000126217	MCF2L	0	1	0
ENSG00000100823	APEX1	0	1	0
ENSG00000092203	TOX4	0	1	0
ENSG00000139880	CDH24	0	1	0
ENSG00000139910	NOVA1	0	1	0
ENSG00000092148	HECTD1	0	1	0
ENSG00000151322	NPAS3	0	1	0
ENSG00000198807	PAX9	0	1	0
ENSG00000151338	MIPOL1	0	1	0
ENSG00000168229	PTGDR	0	1	0
ENSG00000100523	DDHD1	0	1	0
ENSG00000139946	PELI2	0	1	0
ENSG00000165588	OTX2	0	1	0
ENSG00000053770	AP5M1	0	1	0
ENSG00000181619	GPR135	0	1	0
ENSG00000126778	SIX1	0	1	0
ENSG00000139998	RAB15	0	1	0
ENSG00000089916	GPATCH2L	0	1	0
ENSG00000042088	TDP1	0	1	0
ENSG00000100784	RPS6KA5	0	1	0
ENSG00000015133	CCDC88C	0	1	0
ENSG00000140092	FBLN5	0	1	0
ENSG00000066427	ATXN3	0	1	0
ENSG00000140090	SLC24A4	0	1	0
ENSG00000090061	CCNK	0	1	0
ENSG00000185559	DLK1	0	1	0
ENSG00000100664	EIF5	0	1	0
ENSG00000179627	ZBTB42	0	1	0
ENSG00000034053	APBA2	0	1	0
ENSG00000166923	GREM1	0	1	0
ENSG00000175265	GOLGA8A	0	1	0
ENSG00000134138	MEIS2	0	1	0
ENSG00000159459	UBR1	0	1	0
ENSG00000137770	CTDSPL2	0	1	0
ENSG00000069956	MAPK6	0	1	0
ENSG00000069966	GNB5	0	1	0
ENSG00000137766	UNC13C	0	1	0
ENSG00000069869	NEDD4	0	1	0
ENSG00000137845	ADAM10	0	1	0
ENSG00000171956	FOXB1	0	1	0
ENSG00000074410	CA12	0	1	0
ENSG00000103671	TRIP4	0	1	0
ENSG00000166831	RBPMS2	0	1	0
ENSG00000188779	SKOR1	0	1	0
ENSG00000169018	FEM1B	0	1	0
ENSG00000215186	GOLGA6B	0	1	0
ENSG00000067141	NEO1	0	1	0
ENSG00000138622	HCN4	0	1	0
ENSG00000159289	GOLGA6A	0	1	0
ENSG00000138623	SEMA7A	0	1	0
ENSG00000167195	GOLGA6C	0	1	0
ENSG00000140478	GOLGA6D	0	1	0
ENSG00000278662	GOLGA6L10	0	1	0
ENSG00000184206	GOLGA6L4	0	1	0
ENSG00000196547	MAN2A2	0	1	0
ENSG00000176463	SLCO3A1	0	1	0
ENSG00000185551	NR2F2	0	1	0
ENSG00000140450	ARRDC4	0	1	0
ENSG00000059145	UNKL	0	1	0
ENSG00000138834	MAPK8IP3	0	1	0
ENSG00000140992	PDPK1	0	1	0
ENSG00000185739	SRL	0	1	0
ENSG00000089486	CDIP1	0	1	0
ENSG00000157106	SMG1	0	1	0
ENSG00000155592	ZKSCAN2	0	1	0
ENSG00000149923	PPP4C	0	1	0
ENSG00000090238	YPEL3	0	1	0
[truncated: 1,095 more rows]
