# Supplementary material for: Synergism of Pro-neurogenic miRNAs&nbsp;Provides a More Effective Strategy to Target Glioma Stem Cells
Source: Research Square preprint supplement (doi:10.21203/rs.3.rs-125940/v1), 2020-12-15
Supplement: Supplementary file 6 [file 7e11ee69ee98428874afb526.xlsx]

## Sheet: Down all overlap GO
PANTHER GO-Slim Biological Process	Homo sapiens - REFLIST (20851)	upload_1 (745)	upload_1 (expected)	upload_1 (over/under)	upload_1 (fold Enrichment)	upload_1 (raw P-value)	upload_1 (FDR)
response to hypoxia (GO:0001666)	12	4	0.43	+	9.33	0.00184	0.0399
DNA-dependent DNA replication (GO:0006261)	62	11	2.22	+	4.97	3.88e-05	0.00616
DNA replication (GO:0006260)	73	12	2.61	+	4.6	3.4e-05	0.00638
regulation of axonogenesis (GO:0050770)	43	7	1.54	+	4.56	0.00155	0.0368
regulation of neuron differentiation (GO:0045664)	90	13	3.22	+	4.04	5.42e-05	0.00746
DNA biosynthetic process (GO:0071897)	97	13	3.47	+	3.75	0.000108	0.00966
regulation of neurogenesis (GO:0050767)	108	14	3.86	+	3.63	8.18e-05	0.00804
regulation of nervous system development (GO:0051960)	121	15	4.32	+	3.47	7.3e-05	0.00793
regulation of mitotic cell cycle (GO:0007346)	115	14	4.11	+	3.41	0.00015	0.00996
positive regulation of developmental process (GO:0051094)	84	10	3	+	3.33	0.00149	0.0363
regulation of cell development (GO:0060284)	118	14	4.22	+	3.32	0.000191	0.0119
regulation of multicellular organismal development (GO:2000026)	177	21	6.32	+	3.32	5.3e-06	0.00273
negative regulation of cell cycle (GO:0045786)	86	10	3.07	+	3.25	0.00175	0.0385
regulation of anatomical structure morphogenesis (GO:0022603)	133	15	4.75	+	3.16	0.00019	0.0122
regulation of cell cycle (GO:0051726)	222	25	7.93	+	3.15	1.64e-06	0.00169
DNA recombination (GO:0006310)	99	11	3.54	+	3.11	0.00147	0.0361
regulation of cell differentiation (GO:0045595)	156	16	5.57	+	2.87	0.000316	0.0163
axon development (GO:0061564)	132	13	4.72	+	2.76	0.00157	0.0367
regulation of developmental process (GO:0050793)	247	24	8.83	+	2.72	2.54e-05	0.00582
negative regulation of transcription by RNA polymerase II (GO:0000122)	180	17	6.43	+	2.64	0.0005	0.0191
regulation of multicellular organismal process (GO:0051239)	276	25	9.86	+	2.54	7.43e-05	0.00767
DNA repair (GO:0006281)	202	17	7.22	+	2.36	0.00206	0.0438
cellular response to DNA damage stimulus (GO:0006974)	264	22	9.43	+	2.33	0.000451	0.0182
mitotic cell cycle (GO:0000278)	278	23	9.93	+	2.32	0.00036	0.0173
mitotic cell cycle process (GO:1903047)	278	23	9.93	+	2.32	0.00036	0.0169
mitotic nuclear division (GO:0140014)	278	23	9.93	+	2.32	0.00036	0.0165
DNA metabolic process (GO:0006259)	319	25	11.4	+	2.19	0.000473	0.0188
nuclear division (GO:0000280)	321	25	11.47	+	2.18	0.000505	0.0189
negative regulation of biosynthetic process (GO:0009890)	336	26	12.01	+	2.17	0.000412	0.0177
negative regulation of cellular biosynthetic process (GO:0031327)	336	26	12.01	+	2.17	0.000412	0.0173
organelle fission (GO:0048285)	340	26	12.15	+	2.14	0.000682	0.0231
cell cycle (GO:0007049)	477	35	17.04	+	2.05	0.000121	0.00999
negative regulation of macromolecule biosynthetic process (GO:0010558)	328	24	11.72	+	2.05	0.00164	0.0379
negative regulation of cellular macromolecule biosynthetic process (GO:2000113)	328	24	11.72	+	2.05	0.00164	0.0375
positive regulation of transcription by RNA polymerase II (GO:0045944)	345	25	12.33	+	2.03	0.00136	0.0356

## Sheet: Down all overlap KEGG
Enrichment FDR	Genes in list	Total genes	Functional Category	Genes
0.015057	14	134	Ribosome	RPL13A MRPL13 MRPL18 RPL3 RPL9 RPL11 RPL12 RPL15 RPL28 RPL37 RPLP0 MRPL12 RPS13 RPS15A
0.015057	13	124	Cell cycle	MAD2L2 E2F1 E2F3 MYC ORC1 SKP2 WEE1 YWHAB CDC45 CCNE1 CCNE2 CDC25B CDC25C
0.015057	15	160	Cellular senescence	HIPK3 MAPK14 E2F1 E2F3 AKT2 HIPK2 SLC25A5 SLC25A6 MYC PPP1CC ZFP36L1 ZFP36L2 CALM3 CCNE1 CCNE2
0.015057	15	150	MicroRNAs in cancer	CRKL E2F1 E2F3 EGFR HMOX1 MYC NOTCH1 DDIT4 RDX BMI1 CCNE1 BMF CCNE2 RPS6KA5 CDC25B

## Sheet: UP all overlap GO
PANTHER GO-Slim Biological Process	Homo sapiens - REFLIST (20851)	Input (863)	Expected	over/under	fold Enrichment	(raw P-value)	(FDR)
vesicle transport along microtubule (GO:0047496)	14	5	0.58	+	8.63	0.000716	0.0202
axo-dendritic transport (GO:0008088)	16	5	0.66	+	7.55	0.00117	0.0292
regulation of microtubule polymerization or depolymerization (GO:0031110)	20	5	0.83	+	6.04	0.00268	0.049
negative regulation of kinase activity (GO:0033673)	38	7	1.57	+	4.45	0.00185	0.0391
negative regulation of transferase activity (GO:0051348)	39	7	1.61	+	4.34	0.00211	0.0428
microtubule polymerization or depolymerization (GO:0031109)	39	7	1.61	+	4.34	0.00211	0.0424
negative regulation of phosphorylation (GO:0042326)	41	7	1.7	+	4.13	0.00272	0.0492
cellular protein complex disassembly (GO:0043624)	41	7	1.7	+	4.13	0.00272	0.0487
neurotransmitter secretion (GO:0007269)	47	8	1.95	+	4.11	0.0014	0.0329
signal release from synapse (GO:0099643)	47	8	1.95	+	4.11	0.0014	0.0325
regulation of exocytosis (GO:0017157)	59	10	2.44	+	4.1	0.000379	0.0135
regulated exocytosis (GO:0045055)	54	9	2.24	+	4.03	0.000819	0.0222
sodium ion transmembrane transport (GO:0035725)	54	9	2.24	+	4.03	0.000819	0.0219
vesicle fusion to plasma membrane (GO:0099500)	104	17	4.3	+	3.95	6.02e-06	0.00207
exocytic process (GO:0140029)	104	17	4.3	+	3.95	6.02e-06	0.00177
exocytosis (GO:0006887)	104	17	4.3	+	3.95	6.02e-06	0.00155
activation of protein kinase activity (GO:0032147)	51	8	2.11	+	3.79	0.00222	0.0428
signal release (GO:0023061)	58	9	2.4	+	3.75	0.00128	0.0308
protein-containing complex disassembly (GO:0032984)	66	10	2.73	+	3.66	0.000829	0.0219
protein secretion (GO:0009306)	61	9	2.52	+	3.56	0.00176	0.0386
establishment of protein localization to extracellular region (GO:0035592)	62	9	2.57	+	3.51	0.00194	0.0405
protein localization to extracellular region (GO:0071692)	63	9	2.61	+	3.45	0.00214	0.0426
sodium ion transport (GO:0006814)	63	9	2.61	+	3.45	0.00214	0.0421
peptide secretion (GO:0002790)	64	9	2.65	+	3.4	0.00236	0.0447
secretion by cell (GO:0032940)	164	22	6.79	+	3.24	5.09e-06	0.0021
regulation of kinase activity (GO:0043549)	150	20	6.21	+	3.22	1.46e-05	0.00216
vesicle fusion (GO:0006906)	136	18	5.63	+	3.2	4.22e-05	0.00363
regulation of protein kinase activity (GO:0045859)	144	19	5.96	+	3.19	2.71e-05	0.00294
organelle membrane fusion (GO:0090174)	137	18	5.67	+	3.17	4.6e-05	0.00351
secretion (GO:0046903)	170	22	7.04	+	3.13	8.52e-06	0.00147
regulation of vesicle-mediated transport (GO:0060627)	101	13	4.18	+	3.11	0.000602	0.0188
regulation of secretion by cell (GO:1903530)	94	12	3.89	+	3.08	0.00103	0.0262
membrane fusion (GO:0061025)	165	21	6.83	+	3.08	1.7e-05	0.00234
regulation of transferase activity (GO:0051338)	158	20	6.54	+	3.06	2.88e-05	0.00297
export from cell (GO:0140352)	182	23	7.53	+	3.05	7.62e-06	0.00143
regulation of secretion (GO:0051046)	97	12	4.01	+	2.99	0.00131	0.0312
organelle fusion (GO:0048284)	146	18	6.04	+	2.98	9.64e-05	0.00452
cell morphogenesis involved in neuron differentiation (GO:0048667)	141	17	5.84	+	2.91	0.00019	0.008
cell projection morphogenesis (GO:0048858)	158	19	6.54	+	2.91	8.42e-05	0.00458
neuron projection morphogenesis (GO:0048812)	158	19	6.54	+	2.91	8.42e-05	0.00446
plasma membrane bounded cell projection morphogenesis (GO:0120039)	158	19	6.54	+	2.91	8.42e-05	0.00435
cell part morphogenesis (GO:0032990)	159	19	6.58	+	2.89	9.09e-05	0.00436
axon guidance (GO:0007411)	101	12	4.18	+	2.87	0.0018	0.039
neuron projection guidance (GO:0097485)	101	12	4.18	+	2.87	0.0018	0.0386
establishment of vesicle localization (GO:0051650)	129	15	5.34	+	2.81	0.000626	0.019
vesicle localization (GO:0051648)	129	15	5.34	+	2.81	0.000626	0.0187
axonogenesis (GO:0007409)	130	15	5.38	+	2.79	0.000673	0.0193
cellular component disassembly (GO:0022411)	104	12	4.3	+	2.79	0.00224	0.0429
axon development (GO:0061564)	132	15	5.46	+	2.75	0.000777	0.0217
organelle localization (GO:0051640)	223	25	9.23	+	2.71	2.03e-05	0.00233
neuron projection development (GO:0031175)	197	22	8.15	+	2.7	6.59e-05	0.00425
regulation of cytoskeleton organization (GO:0051493)	150	16	6.21	+	2.58	0.000979	0.0253
neuron development (GO:0048666)	208	22	8.61	+	2.56	0.00022	0.00841
protein localization to membrane (GO:0072657)	153	16	6.33	+	2.53	0.00118	0.0291
signal transduction by protein phosphorylation (GO:0023014)	154	16	6.37	+	2.51	0.00126	0.0306
cell morphogenesis (GO:0000902)	261	27	10.8	+	2.5	4.3e-05	0.00355
neurogenesis (GO:0022008)	310	31	12.83	+	2.42	1.84e-05	0.00238
regulation of protein phosphorylation (GO:0001932)	283	28	11.71	+	2.39	5.53e-05	0.00394
regulation of transport (GO:0051049)	244	24	10.1	+	2.38	0.000207	0.00823
cell morphogenesis involved in differentiation (GO:0000904)	183	18	7.57	+	2.38	0.00143	0.0327
regulation of phosphorylation (GO:0042325)	297	29	12.29	+	2.36	7.22e-05	0.00438
generation of neurons (GO:0048699)	293	28	12.13	+	2.31	0.00012	0.0055
cell projection organization (GO:0030030)	356	34	14.73	+	2.31	1.9e-05	0.0023
cellular component morphogenesis (GO:0032989)	287	27	11.88	+	2.27	0.00019	0.00786
regulation of phosphorus metabolic process (GO:0051174)	321	30	13.29	+	2.26	8.4e-05	0.00482
regulation of phosphate metabolic process (GO:0019220)	321	30	13.29	+	2.26	8.4e-05	0.00469
protein phosphorylation (GO:0006468)	493	46	20.4	+	2.25	1.59e-06	0.00164
microtubule-based movement (GO:0007018)	204	19	8.44	+	2.25	0.00164	0.0365
plasma membrane bounded cell projection organization (GO:0120036)	347	32	14.36	+	2.23	8.17e-05	0.00482
neuron differentiation (GO:0030182)	273	25	11.3	+	2.21	0.000452	0.0153
cell adhesion (GO:0007155)	299	27	12.38	+	2.18	0.000456	0.0152
biological adhesion (GO:0022610)	299	27	12.38	+	2.18	0.000456	0.0149
regulation of protein modification process (GO:0031399)	339	30	14.03	+	2.14	0.00022	0.00856
nervous system development (GO:0007399)	427	37	17.67	+	2.09	5.88e-05	0.00405
regulation of localization (GO:0032879)	395	33	16.35	+	2.02	0.000371	0.0137
phosphorylation (GO:0016310)	592	49	24.5	+	2	1.26e-05	0.002

## Sheet: UP all overlap KEGG
Enrichment FDR	Genes in list	Total genes	Functional Category	Genes
4.91199e-05	8	19	Steroid biosynthesis	CYP51A1 DHCR7 DHCR24 FDFT1 HSD17B7 MSMO1 SC5D SQLE
0.000170121	22	181	Axon guidance	MYL12B SEMA4F SEMA4B DPYSL2 EFNA5 EPHB1 GNAI1 KRAS L1CAM NFATC2 NRAS PAK3 PARD6A SEMA4C PPP3CB PRKCA PRKCZ PAK6 LRRC4 SEMA7A SSH2 UNC5C
0.00281385	16	131	Dopaminergic synapse	GNAI1 GNAQ GNG3 KIF5A ARRB2 MAOA GNG2 PPP2R2B PPP2R5B PPP3CB PRKCA PRKCB GNB4 CREB3L2 CACNA1B CLOCK
0.00355551	26	295	MAPK signaling pathway	DUSP1 DUSP3 EFNA5 EGF ELK4 FGF2 MAPK8IP2 IL1R1 IL1RAP KRAS ARRB2 MAP3K5 NRAS TAOK3 PPP3CB PRKCA PRKCB MAP2K3 MAP2K5 CACNG8 RPS6KA2 TGFBR2 CACNA1B CACNA2D1 CACNB2 PLA2G4C
0.00592455	6	22	Terpenoid backbone biosynthesis	HMGCR HMGCS1 IDI1 ACAT2 MVD MVK
0.00608461	13	106	Parathyroid hormone synthesis, secretion and action	AKAP13 HBEGF GNAI1 GNAQ ARRB2 MEF2A MEF2D MMP15 MMP16 PRKCA PRKCB CREB3L2 CREB5
0.00608461	20	211	Human immunodeficiency virus 1 infection	AP1S1 PTK2B GNAI1 GNAQ GNG3 TMEM173 KRAS NFATC2 NRAS PAK3 GNG2 PPP3CB PRKCA PRKCB MAP2K3 PAK6 GNB4 TLR4 CUL4B CCNB3
0.00674569	16	153	Oxytocin signaling pathway	GNAI1 GNAQ KCNJ2 KRAS NFATC2 NRAS PPP3CB PRKCA PRKCB MAP2K5 CAMK1D CACNG8 RGS2 CACNA2D1 CACNB2 PLA2G4C
0.0073896	13	112	Cholinergic synapse	GNAI1 GNAQ GNG3 KCNJ2 KRAS ACHE NRAS GNG2 PRKCA PRKCB GNB4 CREB3L2 CACNA1B
0.0073896	13	112	Serotonergic synapse	DUSP1 GNAI1 GNAQ GNG3 KRAS MAOA NRAS GNG2 PRKCA PRKCB GNB4 CACNA1B PLA2G4C
0.00874424	6	27	Glycosphingolipid biosynthesis	ST3GAL6 B3GNT2 FUT4 A4GALT B3GNT4 B3GNT5
0.00874424	15	148	Phospholipase D signaling pathway	RAPGEF4 DGKG DGKH LPAR1 EGF PTK2B DNM3 KRAS SHC4 NRAS SHC3 PRKCA AGPAT4 PLA2G4C PLPP1
0.00874424	11	88	Gap junction	TUBB3 LPAR1 EGF GNAI1 GNAQ KRAS NRAS PRKCA PRKCB MAP2K5 TUBB2A
0.00874424	11	89	GABAergic synapse	ABAT GNAI1 GNG3 GNG2 PRKCA PRKCB GNB4 TRAK2 CACNA1B SLC38A1 HAP1
0.0127039	18	206	Rap1 signaling pathway	RGS14 RAPGEF4 LPAR1 EFNA5 EGF FGF2 SIPA1L1 GNAI1 GNAQ KRAS NRAS PARD6A PRKCA PRKCB PRKCZ MAP2K3 RASSF5 DOCK4
0.0127039	25	330	Human papillomavirus infection	DLG3 EGF ITGA6 ITGA2 ITGB8 KRAS LAMA2 LAMA3 NOTCH4 NRAS PARD6A ATP6V1B2 PPP2R2B PPP2R5B PRKCZ CREB3L2 SPP1 THBS2 WNT9A AXIN2 FZD7 ITGA10 CCND2 CREB5 IKBKE
0.0136658	26	353	PI3K-Akt signaling pathway	LPAR1 EFNA5 EGF FGF2 GNG3 IL6R ITGA6 ITGA2 ITGB8 KRAS LAMA2 LAMA3 NRAS GNG2 PPP2R2B PPP2R5B PRKCA GNB4 CREB3L2 SPP1 THBS2 TLR4 YWHAH ITGA10 CCND2 CREB5
0.0150375	14	145	Adrenergic signaling in cardiomyocytes	RAPGEF4 GNAI1 GNAQ MYH7 ATP1A3 ATP2B2 PPP2R2B PPP2R5B PRKCA CACNG8 SCN7A CREB3L2 CACNA2D1 CACNB2
0.0150375	13	129	Relaxin signaling pathway	GNAI1 GNG3 KRAS SHC4 ARRB2 NRAS SHC3 GNG2 PRKCA PRKCZ GNB4 CREB3L2 TGFBR2
0.0155159	10	85	ErbB signaling pathway	HBEGF EGF KRAS SHC4 NRAS PAK3 SHC3 PRKCA PRKCB PAK6
